# Supplementary material
Source: PubMed Central journal article supplement (PMC6217806)
Supplement: NIHMS989976-supplement-1.pdf [file NIHMS989976-supplement-1.pdf]

## Supplementary Data

# Identification, structural modification, and dichotomous effects on human immunodeficiency virus type 1 (HIV-1) replication of ingenane esters from *Euphorbia kansui*

Qingbo Liu <sup>a,b</sup>, Wei Li <sup>a,\*</sup>, Li Huang <sup>c</sup>, Yoshihisa Asada <sup>a</sup>, Susan L. Morris-Natschke <sup>d</sup>, Chin-Ho Chen <sup>c,\*</sup>, Kuo-Hsiung Lee <sup>d,e,\*</sup>, Kazuo Koike <sup>a,\*</sup>

<sup>a</sup> Faculty of Pharmaceutical Sciences, Toho University, Miyama 2-2-1, Funabashi, Chiba 274-8510, Japan

<sup>b</sup> Key Laboratory of Structure-Based Drug Design and Discovery of Ministry of Education, Shenyang Pharmaceutical University, Shenyang 110016, China.

<sup>c</sup> Surgical Science, Department of Surgery, Duke University Medical Center, Durham, North Carolina 27710, United States

<sup>d</sup> Natural Products Research Laboratories, UNC Eshelman School of Pharmacy, University of North Carolina, Chapel Hill, North Carolina 27599, United States

<sup>e</sup> Chinese Medicine Research and Development Center, China Medical University and Hospital, Taichung 40402, Taiwan

Correspondence:

E-mail addresses: liwei@phar.toho-u.ac.jp (W. Li).  
chc@duke.edu (C.-H. Chen).

khlee@unc.edu (K.-H. Lee).  
koike@phar.toho-u.ac.jp (K. Koike).

### Table of Contents

|                                                                                 |     |
|---------------------------------------------------------------------------------|-----|
| Anti-HIV activities of <i>E. kansui</i> MeOH extract and fractions (E1-4) ..... | S2  |
| Selective deacylation of ingenane esters <b>1</b> and <b>5</b> .....            | S2  |
| LC-MS analysis .....                                                            | S4  |
| Spectra data of <b>10</b> .....                                                 | S6  |
| Preparation details of <b>19-21</b> .....                                       | S6  |
| HRMS, IR and NMR spectra .....                                                  | S10 |

## Anti-HIV activities of *E. kansui* MeOH extract and fractions (E1-4)

TableS1. Anti-HIV activities of *E. kansui* MeOH extract and fractions

| Extract                   | anti-HIV<br>EC <sub>50</sub> (μg/ml) | cytotoxicity<br>CC <sub>50</sub> (μg/ml) |
|---------------------------|--------------------------------------|------------------------------------------|
| MeOH extract              | 0.15                                 | >10                                      |
| EtOAc fraction            | 0.11                                 | >10                                      |
| H <sub>2</sub> O fraction | >10                                  | >10                                      |
| E1                        | 1.3                                  | >10                                      |
| E2                        | >10                                  | >10                                      |
| E3                        | 0.028                                | 9.4                                      |
| E4                        | 0.86                                 | >10                                      |

### Selective deacylation of ingenane esters **1** and **5**.

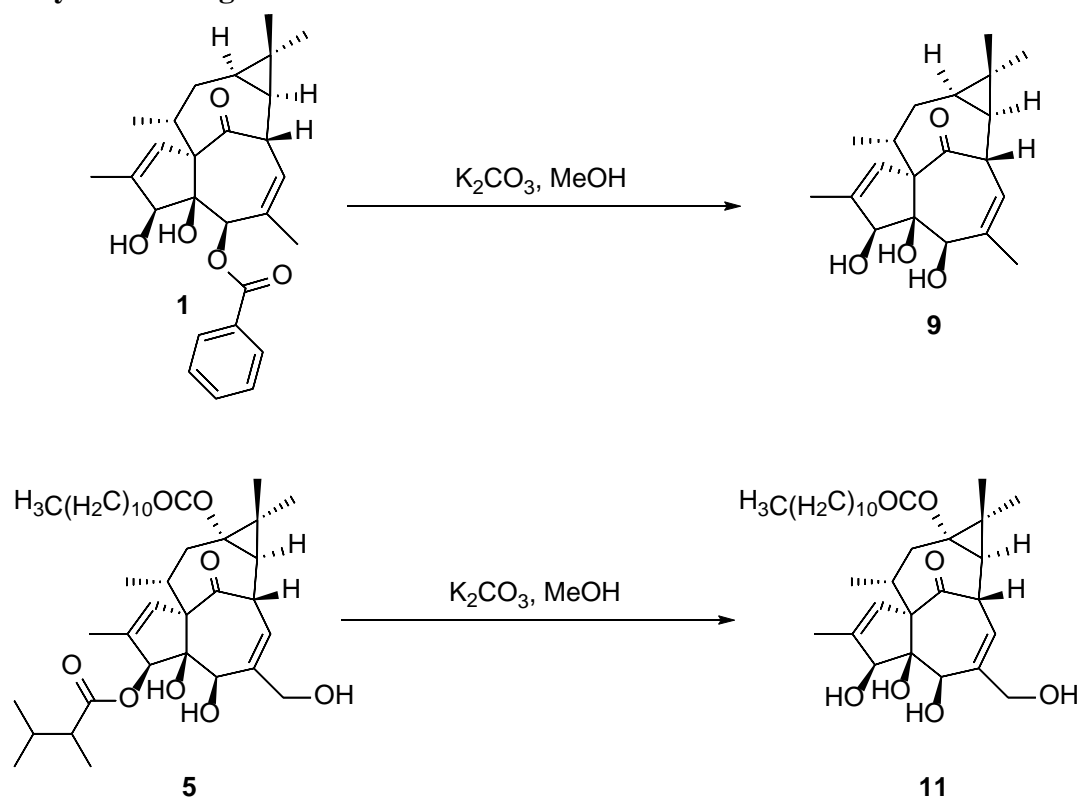

A solution of **1** (4 mg, 9 μmol) or **5** (4 mg, 6 μmol) and potassium carbonate (3 mg, 15 μmol) in 3 mL of anhydrous methanol was stirred at room temperature for 3 h, diluted with diethyl ether, washed with water. After removal of solvent *in vacuo*, the residue was purified by RP-HPLC (YMC Pack Pro C<sub>18</sub>, MeCN-H<sub>2</sub>O, 50:50 and 90:10, 5 mL/min) to give **9** (2.6 mg, 82%,  $t_R$  = 22.0 min) and **11** (2.3 mg, 70%,  $t_R$  = 25.5 min).

*20-Deoxyingenol* (**9**): colorless oil;  $[\alpha]_D^{25}$  -13.5 ( $c$  0.2, MeOH); UV (MeCN)  $\lambda_{max}$  (log  $\epsilon$ ): 205 (4.34) nm; IR (KBr) max: 2923, 1707, 1449, 1379, 1460, 1261, 1168, 1100, 1098, 801  $cm^{-1}$ ; <sup>1</sup>H NMR (pyridine-*d*<sub>5</sub>,

500 MHz)  $\delta$  6.23 (1H, q,  $J = 1.2$  Hz, H-1), 5.02 (1H, d,  $J = 5.8$  Hz, H-3), 3.87 (1H, d,  $J = 10.9$  Hz, H-5), 5.90 (1H, dq,  $J = 4.8, 1.4$  Hz, H-7), 4.60 (1H, ddq,  $J = 11.2, 4.8, 2.0$  Hz, H-8), 2.80 (1H, qdd,  $J = 7.2, 4.6, 3.0$  Hz, H-11), 2.63 (1H, ddd,  $J = 15.4, 8.9, 3.0$  Hz, H<sub>2</sub>-12a), 1.75 (1H, ddd,  $J = 15.4, 6.3, 4.6$  Hz, H<sub>2</sub>-12b), 0.75 (1H, ddd,  $J = 8.9, 8.6, 6.3$  Hz, H-13), 1.17 (dd,  $J = 12.1, 8.6$  Hz, H-14), 1.06 (3H, s, H<sub>3</sub>-16), 1.24 (3H, s, H<sub>3</sub>-17), 1.14 (3H, d,  $J = 7.2$  Hz, H<sub>3</sub>-18), 1.89 (3H, d,  $J = 1.2$  Hz, H<sub>3</sub>-19), 1.96 (3H, brs, H<sub>3</sub>-20); <sup>13</sup>C NMR (pyridine-*d*<sub>5</sub>, 125 MHz)  $\delta$  129.5 (C-1), 140.3 (C-2), 80.6 (C-3), 85.9 (C-4), 77.0 (C-5), 140.4 (C-6), 123.1 (C-7), 44.4 (C-8), 207.4 (C-9), 73.3 (C-10), 39.9 (C-11), 31.4 (C-12), 23.7 (C-13), 24.3 (C-14), 24.1 (C-15), 28.7 (C-16), 15.8 (C-17), 17.5 (C-18), 15.7 (C-19), 22.8 (C-20); positive-ion HRESIMS  $m/z$  355.1878 [M+Na]<sup>+</sup>, (calcd for C<sub>20</sub>H<sub>28</sub>O<sub>4</sub>Na, 355.1885).

*13-Oxyingenol-13-dodecanoate* (**11**): colorless oil;  $[\alpha]_D^{25}$  -41.4 (*c* 0.2, CHCl<sub>3</sub>); UV (MeCN)  $\lambda_{\max}$  (log  $\epsilon$ ): 203 (4.31); IR (KBr) max: 2926, 1727, 1605, 1458, 1379, 1260, 1021, 800 cm<sup>-1</sup>; <sup>1</sup>H NMR (CDCl<sub>3</sub>, 500 MHz)  $\delta$  5.90 (1H, brq,  $J = 1.6$  Hz, H-1), 4.40 (1H, s, H-3), 3.82 (1H, brs, H-5), 5.90 (1H, dd,  $J = 4.9, 1.4$  Hz, H-7), 4.06 (1H, brdd,  $J = 11.7, 4.0$  Hz, H-8), 2.42 (1H, m, H-11), 2.63 (1H, dd,  $J = 16.6, 4.2$  Hz, CH<sub>2</sub>-12a), 2.18 (1H, overlap, CH<sub>2</sub>-12b), 1.28 (1H, overlap, H-14), 1.05 (3H, s, H<sub>3</sub>-16), 1.20 (H, s, CH<sub>3</sub>-17), 0.95 (3H, d,  $J = 7.2$  Hz, H<sub>3</sub>-18), 1.84 (3H, d,  $J = 1.5$  Hz, H<sub>3</sub>-19), 4.16 (1H, d,  $J = 12.6$  Hz, H<sub>2</sub>-20a), 4.11 (1H, d,  $J = 12.6$  Hz, H<sub>2</sub>-20b), 2.18 (2H, t,  $J = 6.9$  Hz, H<sub>2</sub>-2'), 1.55 (2H, overlap, H<sub>2</sub>-3'), 1.27-1.21 (16H, m, H<sub>2</sub>-4'-H<sub>2</sub>-11'), 0.86 (3H, t,  $J = 6.9$  Hz, H<sub>3</sub>-12') ppm; <sup>13</sup>C NMR (CDCl<sub>3</sub>, 125 MHz)  $\delta$  129.3 (C-1), 139.3 (C-2), 80.4 (C-3), 84.1 (C-4), 75.3 (C-5), 140.8 (C-6), 126.1 (C-7), 43.3 (C-8), 206.2 (C-9), 72.6 (C-10), 38.7 (C-11), 35.1 (C-12), 68.9 (C-13), 28.3 (C-14), 30.3 (C-15), 22.5 (C-16), 16.7 (C-17), 18.4 (C-18), 15.3 (C-19), 66.8 (C-20), 174.0 (C-1'), 34.4 (C-2'), 24.8 (C-3'), 29.7-29.2 (C-4'-C-11'), 14.1 (C-12'); positive-ion HRESIMS  $m/z$  569.3475 [M+Na]<sup>+</sup>, (calcd for C<sub>32</sub>H<sub>50</sub>O<sub>7</sub>Na, 569.3454).

## ESI-MS fragmentation behavior of isolated ingenane esters (1–5) and monitoring deacylation by LC-MS analysis

The reference solutions of **1–5** were prepared by dissolving them in LC-MS grade acetonitrile, and were made up at a concentration of 0.1 mg/mL. The samples (E3-fraction and E3-fraction after deacylation of *E. kansui* MeOH extract) used for LC-MS analysis were prepared by dissolving in MeOH at a concentration of 2.5 mg/mL. All the samples were filtered on 0.45  $\mu\text{m}$  filter.

LC-MS analysis was performed on a Shimadzu LCMS-8040 Triple Quadrupole LC/MS/MS Mass Spectrometer. Nitrogen was used as the dry, nebulizer and auxiliary heated gas, and ultrapure helium was used as the collision gas. The ESI parameters were set as follows: interface voltage (4.5 kV in the positive-ion mode and -3.5 kV in the negative-ion mode); collision voltage, 15 V; dry gas, 15 L/min; dry temperature, 350 °C. Both the positive and negative ionization modes were checked, data reported in the range of  $m/z$  100-800 Da.

HPLC was performed using a Shimadzu 8040 system (Shimadzu, Kyoto, Japan), which was equipped with a binary solvent delivery system and an auto-sampler. Separation was performed on a YMC-Triart C<sub>18</sub> column (150 mm  $\times$  20 mm) maintained at 35°C, and the flow rate was 0.2 mL/min. The mobile phase was composed of A (0.1% formic acid in aqueous solution) and B (acetonitrile) with a gradient elution: 0-30 min, 50%-100% B, and the column was equilibrated for 20 min under the initial conditions. A volume of 2  $\mu\text{L}$  was injected for LC-MS analysis. ESI-MS fragmentation behavior of **1-5** in positive ion mode was shown in Figure S1.



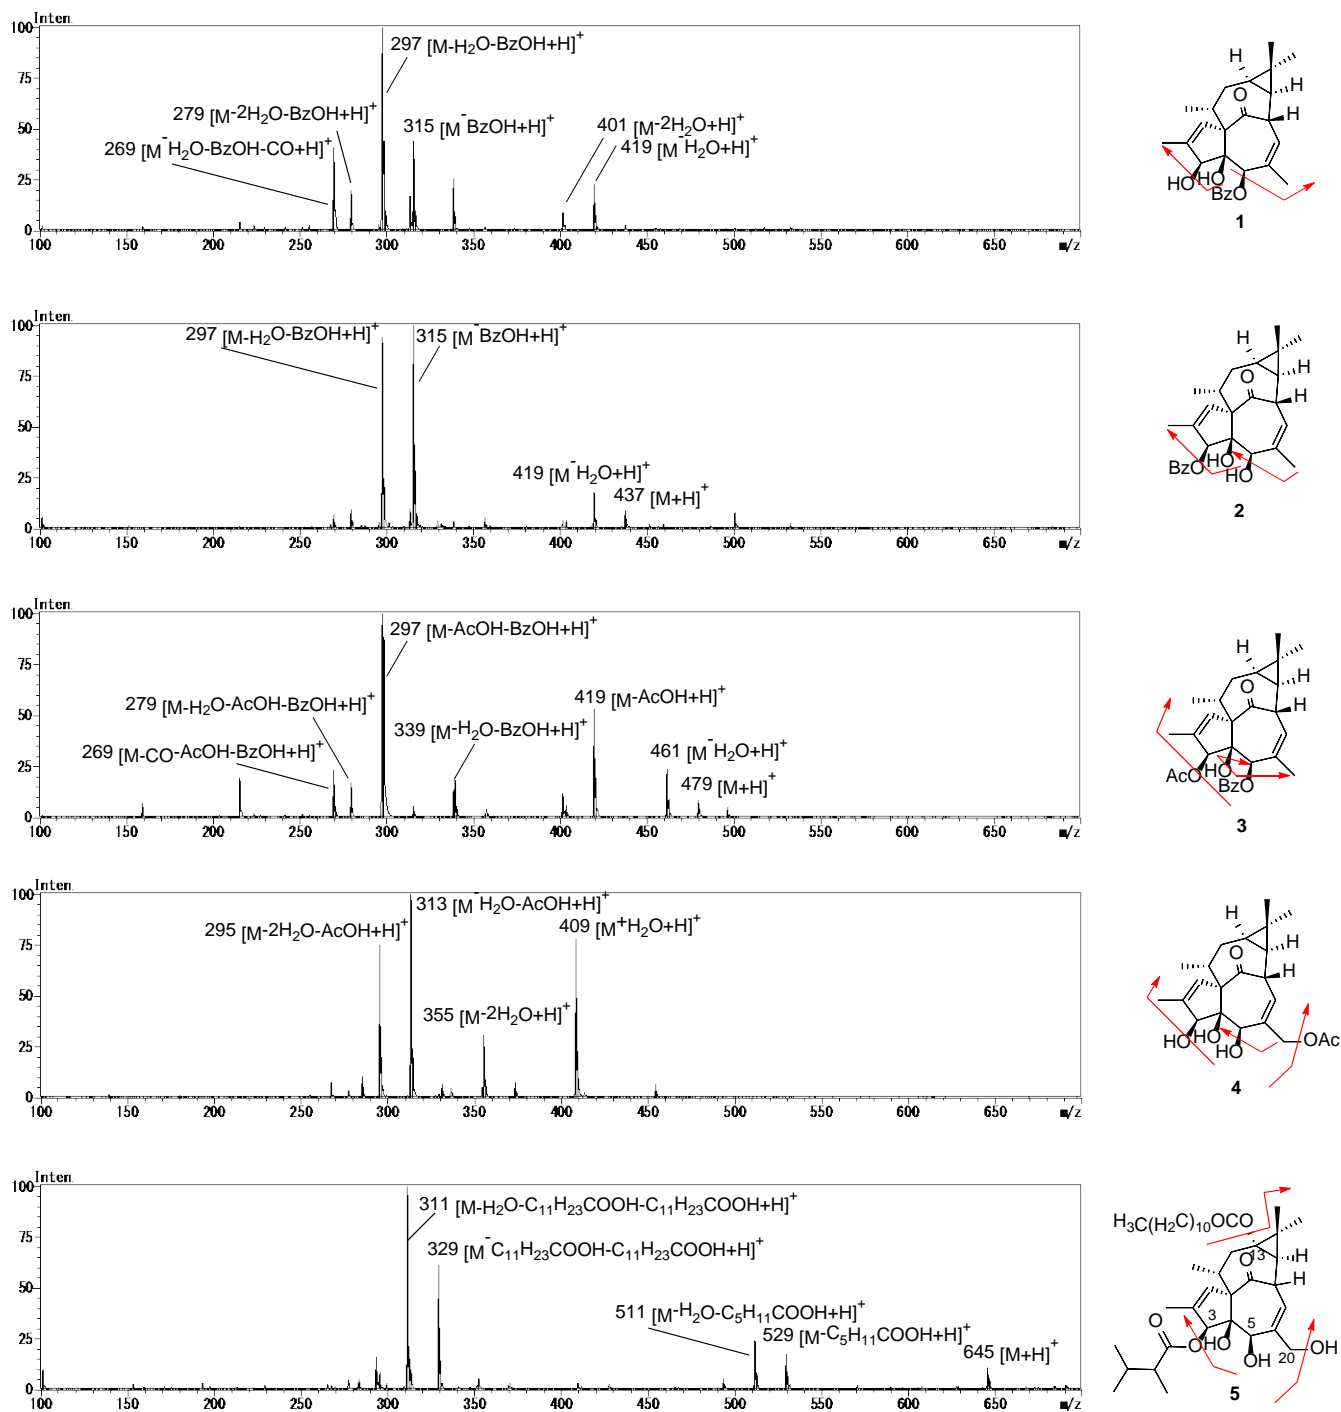

Figure S1. Proposed main ESI-MS fragmentation behavior of **1-5** in positive ion mode.

## Physical and spectroscopic data of ingenol (10).

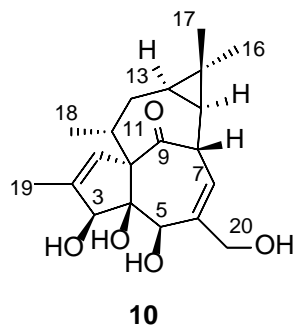

**Ingenol (10):** colorless oil;  $[\alpha]_D^{25} -44.6$  ( $c$  0.4,  $\text{CHCl}_3$ ); UV (MeCN)  $\lambda_{\text{max}}$  ( $\log \epsilon$ ): 203 (4.31) nm; IR (KBr) max: 2935, 1710, 1454, 1379, 1460, 1150, 1017, 756  $\text{cm}^{-1}$ ;  $^1\text{H}$  NMR ( $\text{CDCl}_3$ , 500 MHz)  $\delta$  6.03 (1H, brd,  $J = 4.3$  Hz, H-1), 4.37 (1H, s, H-3), 3.79 (1H, brs, H-5), 5.90 (1H, dd,  $J = 3.1, 1.7$  Hz, H-7), 4.10 (1H, overlap, H-8), 2.32 (1H, m, H-11), 2.26 (1H, ddd,  $J = 15.5, 8.9, 2.8$  Hz, H<sub>2</sub>-12a), 1.74 (1H, ddd,  $J = 15.5, 6.3, 5.1$  Hz, H<sub>2</sub>-12b), 0.68 (1H, ddd,  $J = 8.9, 8.9, 6.3$  Hz, H-13), 0.92 (1H, dd,  $J = 12.0, 8.9$  Hz, H-14), 1.04 (3H, s, H<sub>3</sub>-16), 1.10 (3H, s, H<sub>3</sub>-17), 0.95 (3H, d,  $J = 6.8$  Hz, H<sub>3</sub>-18), 1.83 (3H, d,  $J = 1.5$  Hz, H<sub>3</sub>-19), 4.15 (1H, d,  $J = 12.6$  Hz, H<sub>2</sub>-20a), 4.10 (1H, d,  $J = 12.6$  Hz, H<sub>2</sub>-20b) ppm;  $^{13}\text{C}$  NMR ( $\text{CDCl}_3$ , 125 MHz)  $\delta$  129.8 (C-1), 138.9 (C-2), 80.5 (C-3), 84.3 (C-4), 75.3 (C-5), 140.4 (C-6), 127.4 (C-7), 44.1 (C-8), 207.2 (C-9), 72.6 (C-10), 39.7 (C-11), 30.9 (C-12), 23.2 (C-13), 23.0 (C-14), 23.9 (C-15), 28.5 (C-16), 15.5 (C-17), 17.3 (C-18), 15.4 (C-19), 66.9 (C-20); positive-ion HRESIMS  $m/z$  371.1823  $[\text{M}+\text{Na}]^+$ , (calcd for  $\text{C}_{20}\text{H}_{28}\text{O}_5\text{Na}$ , 371.1834).

## Preparation of ingenol-5,20-acetonide (19).

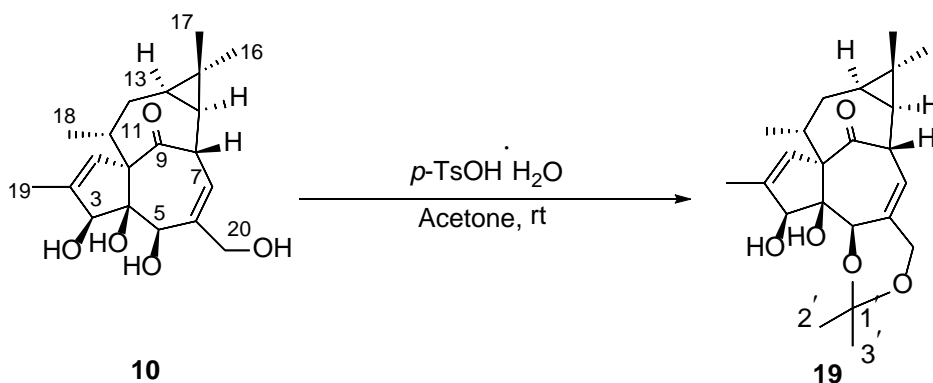

To a stirred solution of **10** (11 mg, 32  $\mu\text{mol}$ ) in acetone (6 mL) was added  $p\text{-TsOH} \cdot \text{H}_2\text{O}$  (0.5 mg, 2.6  $\mu\text{mol}$ ) at room temperature for 2 h. After removal of solvent *in vacuo*, the residue passed through a Sep-

Pak C18 cartridge (Waters) using MeCN-H<sub>2</sub>O (10:90 and 100:0, each 10.0 ml) as solvents. Then, CH<sub>3</sub>CN-H<sub>2</sub>O (100:0) eluate was purified by RP-HPLC (YMC Pack Pro C<sub>18</sub>, MeCN-H<sub>2</sub>O, 60:40, 5 mL/min) to give **19** (8.3 mg, 66.8%, *t<sub>R</sub>* = 21.0 min).

**Ingenol-5,20-acetonide (19)**: colorless oil; [ $\alpha$ ]<sub>D</sub><sup>25</sup> -26.1 (*c* 0.3, CHCl<sub>3</sub>); UV (MeCN)  $\lambda$ <sub>max</sub> (log  $\epsilon$ ): 204 (4.14) nm; IR (KBr) max: 2924, 1724, 1469, 1379, 1261, 1222, 1157, 1077 cm<sup>-1</sup>; <sup>1</sup>H NMR (CDCl<sub>3</sub>, 500 MHz)  $\delta$  5.90 (1H, q, *J* = 1.7 Hz, H-1), 4.23 (1H, s, H-3), 3.91 (1H, brs, H-5), 5.78 (1H, dq, *J* = 4.0, 1.7 Hz, H-7), 4.10 (1H, overlap, H-8), 2.47 (1H, m, H-11), 2.24 (1H, ddd, *J* = 15.8, 8.3, 3.1 Hz, H<sub>2</sub>-12a), 1.76 (1H, ddd, *J* = 15.8, 6.3, 5.5 Hz, H<sub>2</sub>-12b), 0.69 (1H, ddd, *J* = 8.3, 8.3, 6.3 Hz, H-13), 0.91 (1H, dd, *J* = 11.8, 8.3 Hz, H-14), 1.03 (3H, s, H<sub>3</sub>-16), 1.10 (3H, s, H<sub>3</sub>-17), 0.95 (3H, d, *J* = 7.2 Hz, H<sub>3</sub>-18), 1.83 (3H, d, *J* = 1.7 Hz, H<sub>3</sub>-19), 4.15 (1H, d, *J* = 12.6 Hz, H<sub>2</sub>-20a), 4.10 (1H, d, *J* = 12.6 Hz, H<sub>2</sub>-20b), 1.39 (3H, s, H<sub>3</sub>-2'), 1.33 (3H, s, H<sub>3</sub>-3'); <sup>13</sup>C NMR (CDCl<sub>3</sub>, 125 MHz)  $\delta$  129.5 (C-1), 136.1 (C-2), 80.0 (C-3), 83.3 (C-4), 73.8 (C-5), 139.6 (C-6), 122.3 (C-7), 44.0 (C-8), 207.6 (C-9), 72.9 (C-10), 38.3 (C-11), 31.2 (C-12), 23.6 (C-13), 23.0 (C-14), 23.8 (C-15), 28.6 (C-16), 15.6 (C-17), 17.8 (C-18), 15.6 (C-19), 64.2 (C-20), 100.6 (C-1'), 26.6 (C-2'), 21.1 (C-3'); positive-ion HRESIMS *m/z* 411.2147 [M+Na]<sup>+</sup>, (calcd for C<sub>23</sub>H<sub>32</sub>O<sub>5</sub>Na, 411.2159).

#### Preparation of 3-angeloylingenol-5,20-acetonide (**20**).

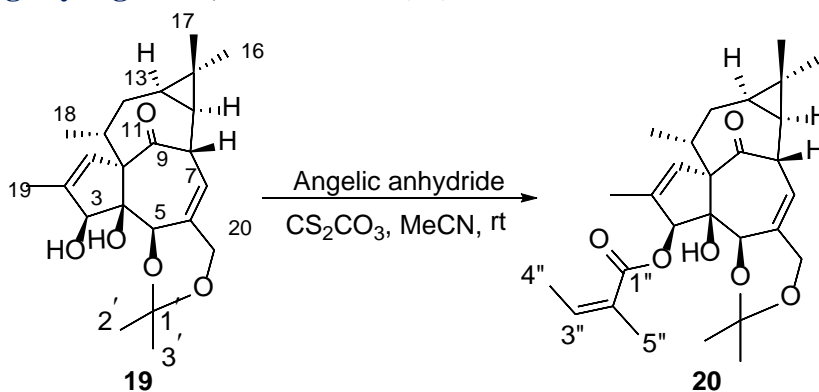

To a stirred solution of diol **19** (2.7 mg, 7  $\mu$ mol) in MeCN (2.0 ml) were added Cs<sub>2</sub>CO<sub>3</sub> (9 mg, 27.6  $\mu$ mol) and angelic anhydride (5  $\mu$ L, 28  $\mu$ mol) at room temperature for 4 h. After removal of solvent *in vacuo*, the residue passed through a Sep-Pak C18 cartridge (Waters) using MeCN-H<sub>2</sub>O (10:90 and 100:0, each 10 mL) as solvents to obtain **20** (3 mg, 95.7%, *t<sub>R</sub>* = 21.0 min).

**3-Angeloylingenol-5,20-acetonide (20):** colorless oil;  $^1\text{H}$  NMR ( $\text{CDCl}_3$ , 500 MHz)  $\delta$  6.03 (1H, brq,  $J = 1.5$  Hz, H-1), 5.64 (1H, s, H-3), 4.00 (1H, brs, H-5), 5.78 (1H, dq,  $J = 4.0, 2.0$  Hz, H-7), 4.15 (1H, m, H-8), 2.59 (1H, m, H-11), 2.25 (1H, ddd,  $J = 15.7, 8.9, 2.8$  Hz,  $\text{CH}_2$ -12a), 1.73 (1H, ddd,  $J = 15.7, 6.3, 5.5$  Hz,  $\text{CH}_2$ -12b), 0.67 (1H, ddd,  $J = 8.9, 8.3, 6.5$  Hz, H-13), 0.89 (1H, dd,  $J = 12.0, 8.3$  Hz, H-14), 1.05 (3H, s,  $\text{H}_3$ -16), 1.15 (3H, s,  $\text{H}_3$ -17), 0.95 (3H, d,  $J = 7.1$  Hz,  $\text{H}_3$ -18), 1.76 (3H, d,  $J = 1.7$  Hz,  $\text{H}_3$ -19), 4.19 (1H, d,  $J = 12.6$  Hz,  $\text{H}_2$ -20a), 4.13 (1H, d,  $J = 12.6$  Hz,  $\text{H}_2$ -20b), 1.44 (3H, s,  $\text{CH}_3$ -2'), 1.40 (3H, s,  $\text{CH}_3$ -3'), 6.06 (1H, qq,  $J = 7.1, 1.5$  Hz, H-3''), 2.00 (1H, dq,  $J = 7.2, 1.5$  Hz, H-4''), 1.91 (3H, qui,  $J = 1.5$  Hz,  $\text{CH}_3$ -5'');  $^{13}\text{C}$  NMR ( $\text{CDCl}_3$ , 125 MHz)  $\delta$  132.5 (C-1), 136.8 (C-2), 81.5 (C-3), 84.1 (C-4), 74.0 (C-5), 136.2 (C-6), 122.2 (C-7), 43.6 (C-8), 208.0 (C-9), 72.3 (C-10), 37.5 (C-11), 30.9 (C-12), 23.2 (C-13), 22.8 (C-14), 23.9 (C-15), 28.3 (C-16), 15.4 (C-17), 17.2 (C-18), 15.5 (C-19), 64.2 (C-20), 100.5 (C-1'), 26.5 (C-2'), 21.1 (C-3'), 168.5 (C-1''), 128.1 (C-2''), 138.2 (C-3''), 15.5 (C-4''), 20.6 (C-5'').

**Preparation of 3-(2-naphthoyl)ingenol-5,20-acetonide (21).**

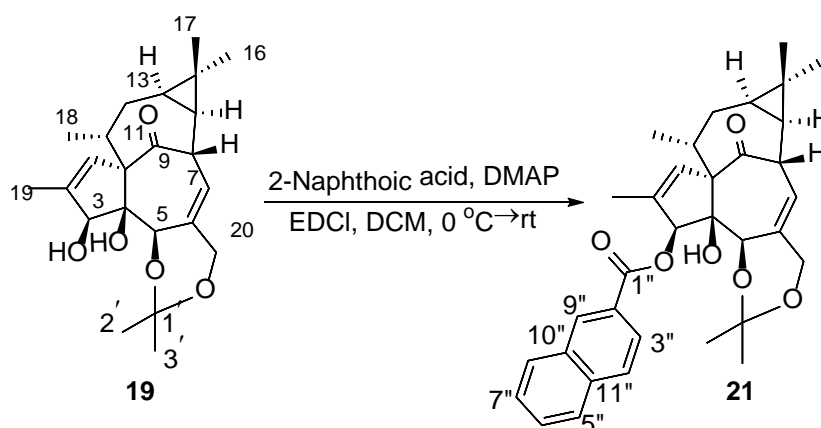

To a stirred solution of diol **19** (2.7 mg, 7  $\mu\text{mol}$ ) in dehydrated DCM (3 mL) were added DMAP (3 mg, 25  $\mu\text{mol}$ ) and 2-naphthoic acid (5 mg, 29  $\mu\text{mol}$ ), and chilled to 0  $^\circ\text{C}$ . A solution of EDCI (4 mg, 20  $\mu\text{mol}$ ) dissolved in dehydrated DCM (0.5 mL) was added dropwise, and the reaction mixture was stirred at room temperature for 4 h under protection of argon. After removal of solvent *in vacuo*, the residue was purified by RP-HPLC (YMC Pack Pro  $\text{C}_{18}$ ,  $\text{MeCN-H}_2\text{O}$ , 80:20, 5.0 mL/min) to give **21** (2.6 mg, 68.6%,  $t_R = 28.5$  min).

**3-(2-naphthoyl)ingenol-5,20-acetonide (21):** colorless oil;  $^1\text{H}$  NMR ( $\text{CDCl}_3$ , 500 MHz)  $\delta$  6.14 (1H,

brq,  $J = 1.5$  Hz, H-1), 5.84 (1H, s, H-3), 4.08 (1H, brs, H-5), 5.78 (1H, dq,  $J = 4.0, 1.7$  Hz, H-7), 4.18 (1H, ddq,  $J = 11.7, 4.0, 2.3$  Hz, H-8), 2.74 (1H, m, H-11), 2.26 (1H, ddd,  $J = 15.8, 8.9, 3.2$  Hz, H<sub>2</sub>-12a), 1.73 (1H, ddd,  $J = 15.8, 8.3, 6.3$  Hz, H<sub>2</sub>-12b), 0.67 (1H, ddd,  $J = 8.9, 8.6, 6.0$  Hz, H-13), 0.91 (1H, dd,  $J = 11.8, 8.3$  Hz, H-14), 1.03 (3H, s, H<sub>3</sub>-16), 1.05 (3H, s, H<sub>3</sub>-17), 1.08 (3H, d,  $J = 7.1$  Hz, H<sub>3</sub>-18), 1.80 (3H, d,  $J = 1.2$  Hz, H<sub>3</sub>-19), 4.23 (1H, d,  $J = 12.6$  Hz, H<sub>2</sub>-20a), 4.15 (1H, d,  $J = 12.6$  Hz, H<sub>2</sub>-20b), 1.50 (3H, s, H<sub>3</sub>-2'), 1.47 (3H, s, H<sub>3</sub>-3'), 8.03 (1H, dd,  $J = 8.6, 1.5$  Hz, H-3''), 7.89 (1H, d,  $J = 8.6$  Hz, H-4''), 7.87 (1H, brd,  $J = 8.0$  Hz, H-5''), 7.58 (1H, ddd,  $J = 8.0, 6.9, 1.2$  Hz, H-6''), 7.53 (1H, ddd,  $J = 8.0, 6.9, 1.2$  Hz, H-7''), 7.95 (1H, brd,  $J = 8.0$  Hz, H-8''), 8.58 (1H, brs, H-9''); <sup>13</sup>C NMR (CDCl<sub>3</sub>, 125 MHz)  $\delta$  132.7 (C-1), 136.5 (C-2), 82.7 (C-3), 84.3 (C-4), 74.1 (C-5), 135.8 (C-6), 124.2 (C-7), 43.4 (C-8), 207.5 (C-9), 72.4 (C-10), 37.9 (C-11), 31.3 (C-12), 23.6 (C-13), 23.0 (C-14), 24.0 (C-15), 28.5 (C-16), 15.5 (C-17), 17.6 (C-18), 15.6 (C-19), 64.4 (C-20), 100.5 (C-1'), 26.8 (C-2'), 20.9 (C-3'), 167.6 (C-1''), 127.5 (C-2''), 125.3 (C-3''), 128.3 (C-4''), 127.7 (C-5''), 128.4 (C-6''), 126.7 (C-7''), 129.4 (C-8''), 131.3 (C-9''), 132.5 (C-10''), 135.6 (C-11'').

測定データ名: KS-2  
 作成条件: 平均(MS[1]) 経過時間: 1.25.1.98

実験日時: 2017/10/07 16:45:24  
 イオン化モード: ESI+

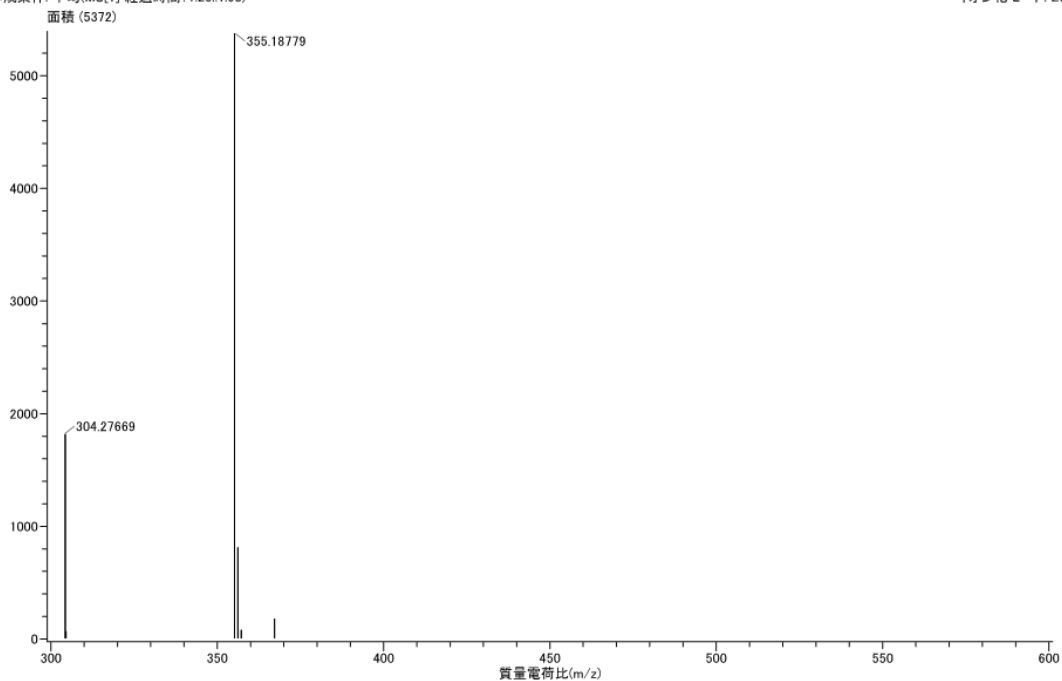

The HRESIMS spectrum of compound 9

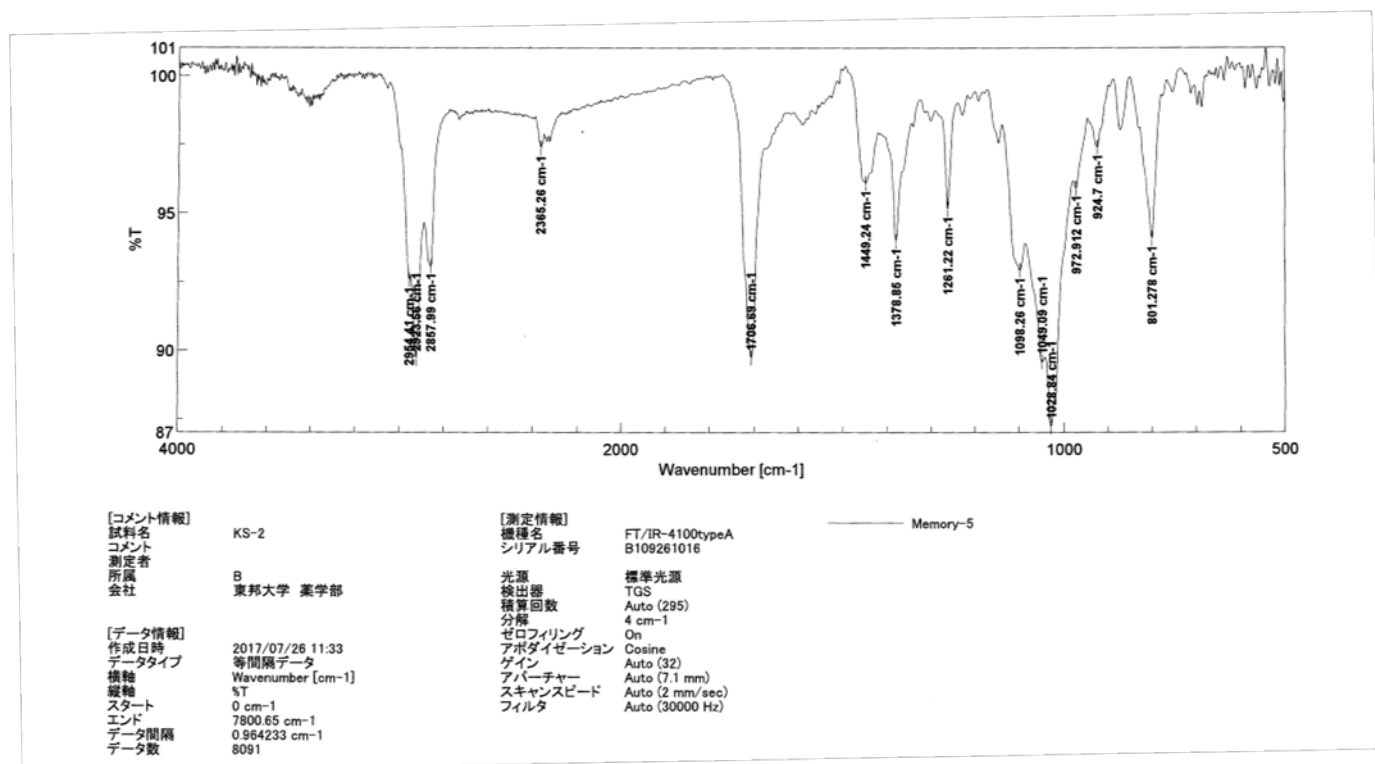

The IR spectrum of compound 9

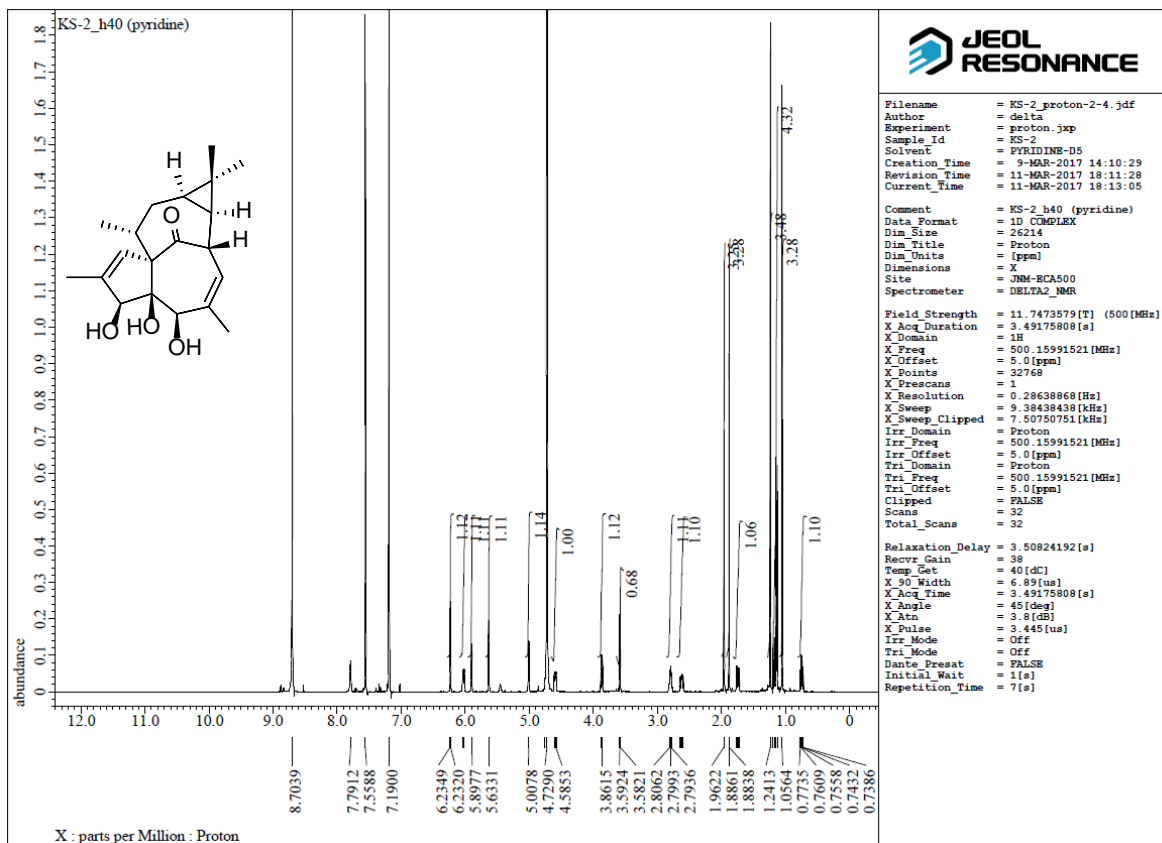

The  $^1\text{H}$  spectrum of compound 9

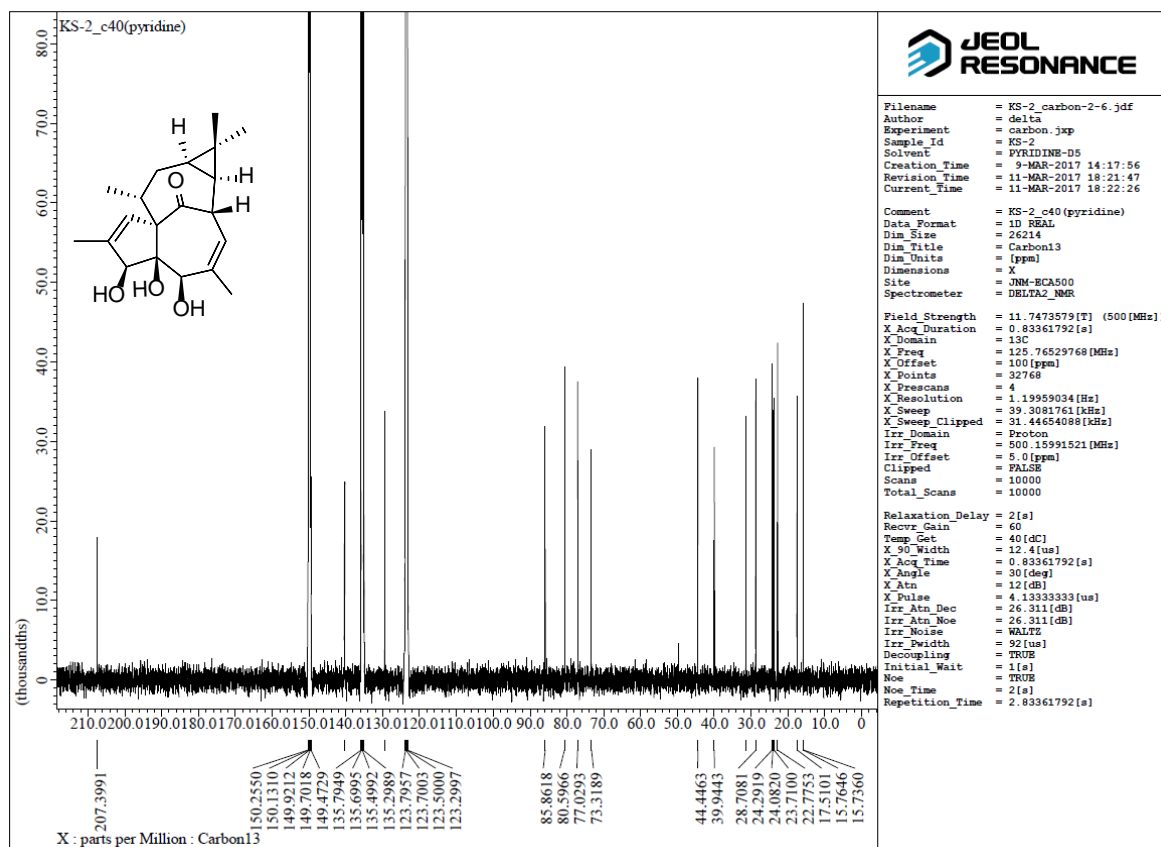

The  $^{13}\text{C}$  spectrum of compound 9

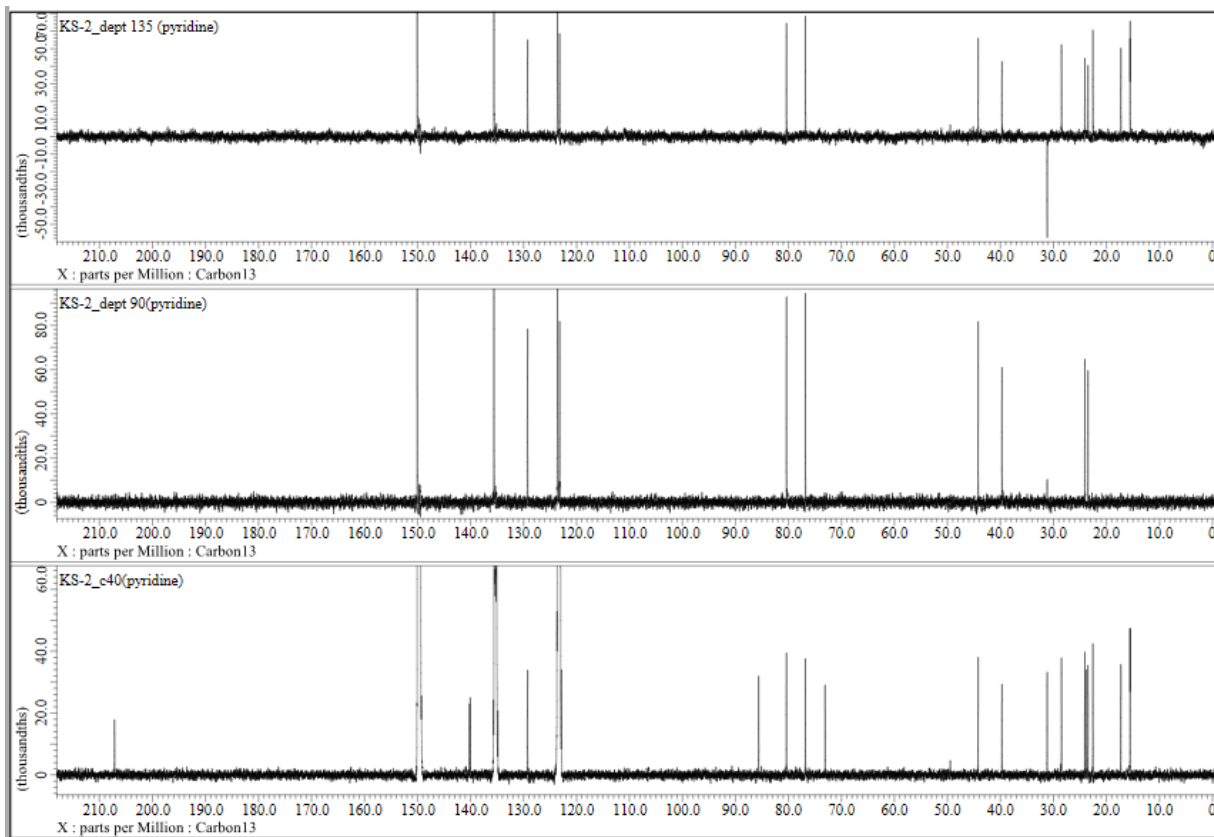

The DEPT spectrum of compound 9

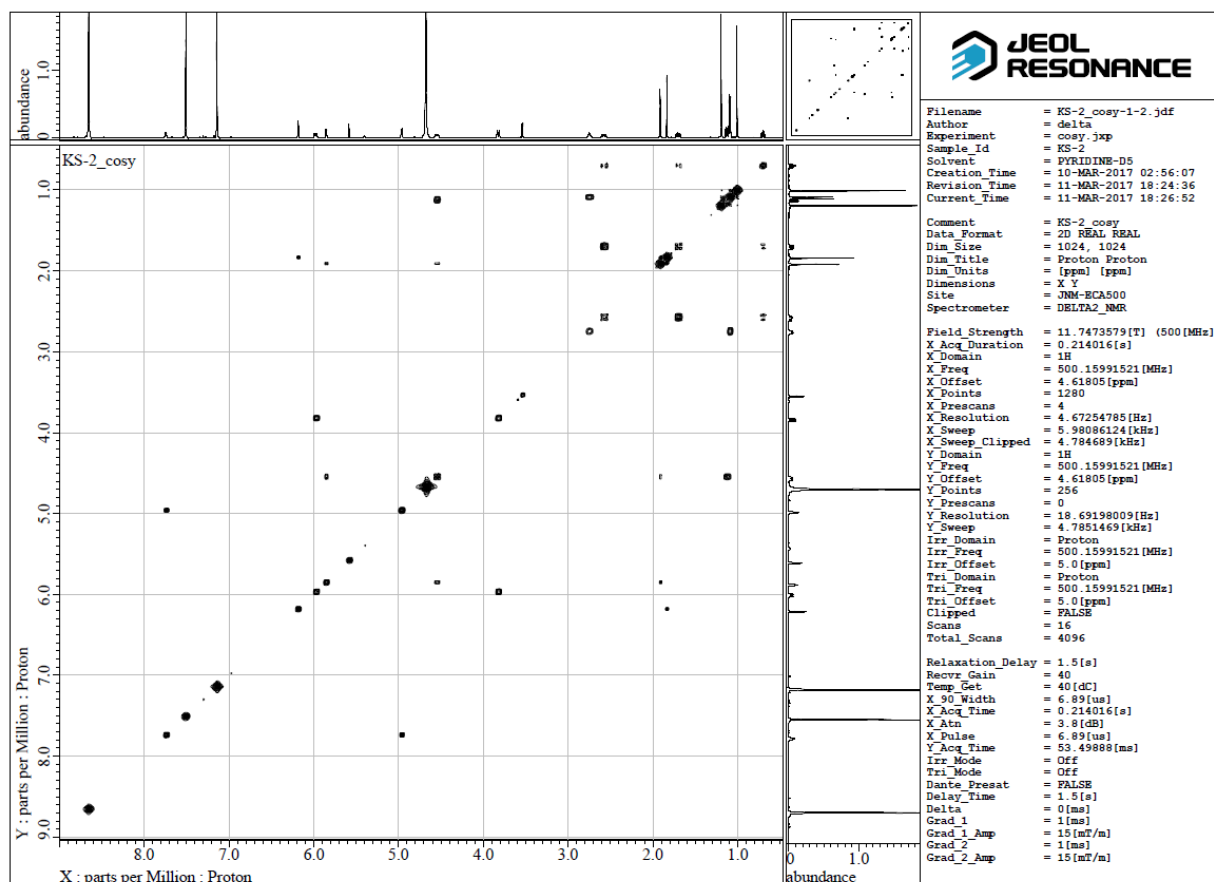

The DQF\_COSY spectrum of compound 9



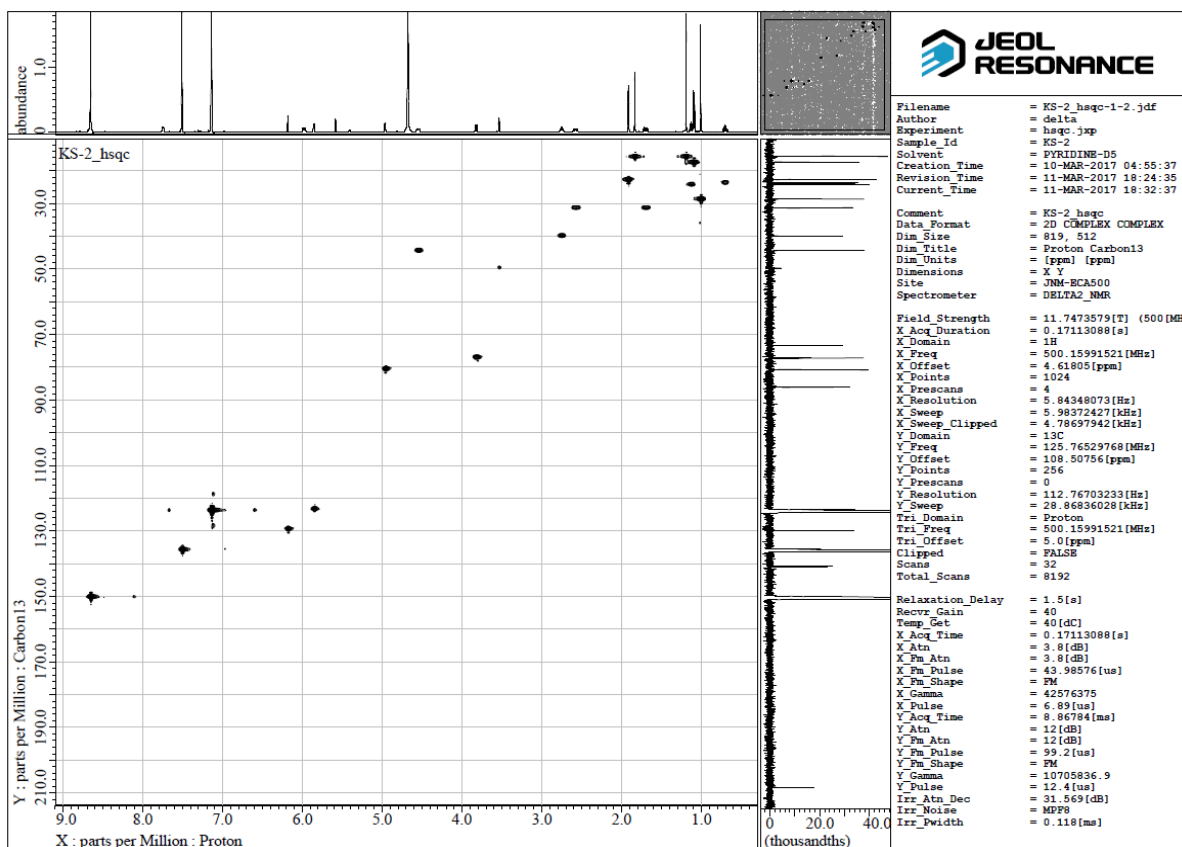

The HSQC spectrum of compound 9

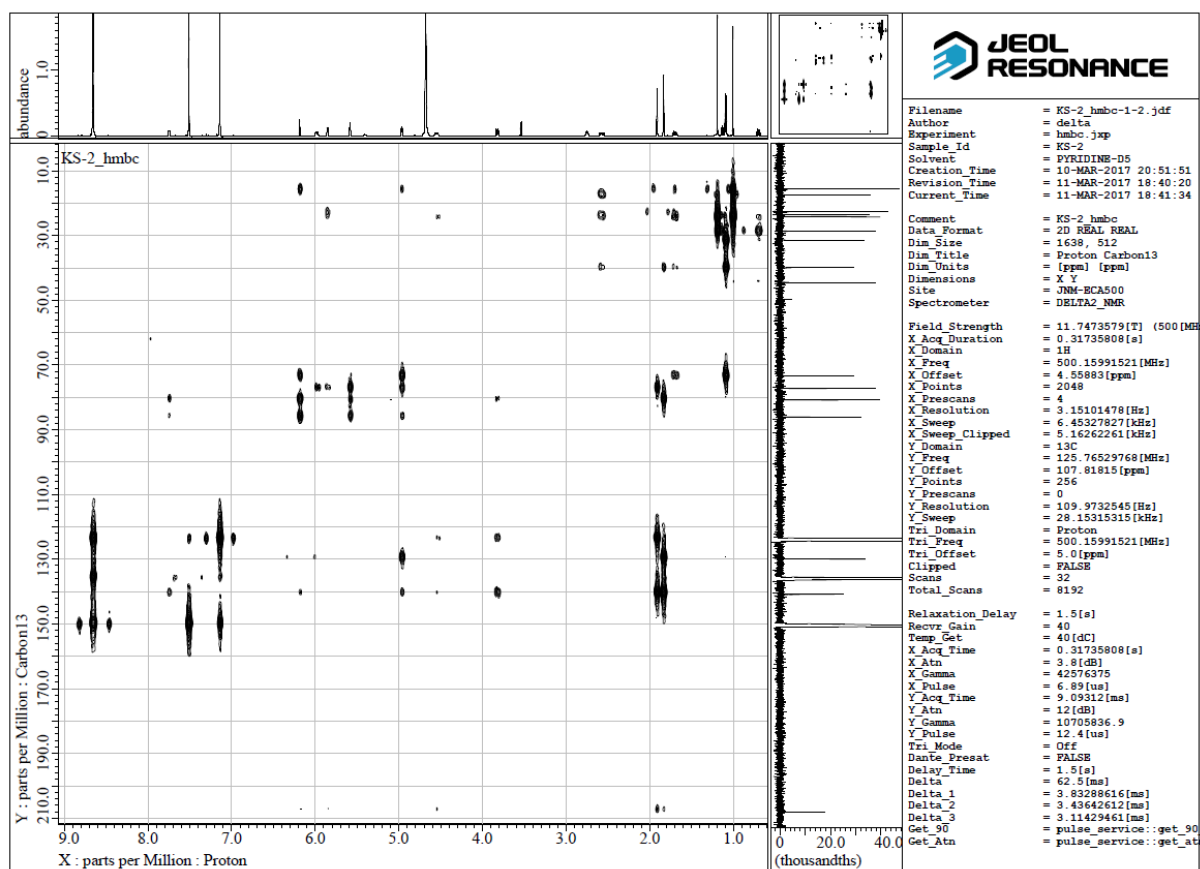

The HMBC spectrum of compound 9

測定データ名: KS-7.02  
 作成条件: 平均(MS[1] 経過時間: 0.47..0.86)  
 x10<sup>3</sup> 面積 (12868)

実験日時: 2017/10/13 21:25:51  
 イオン化モード: ESI+

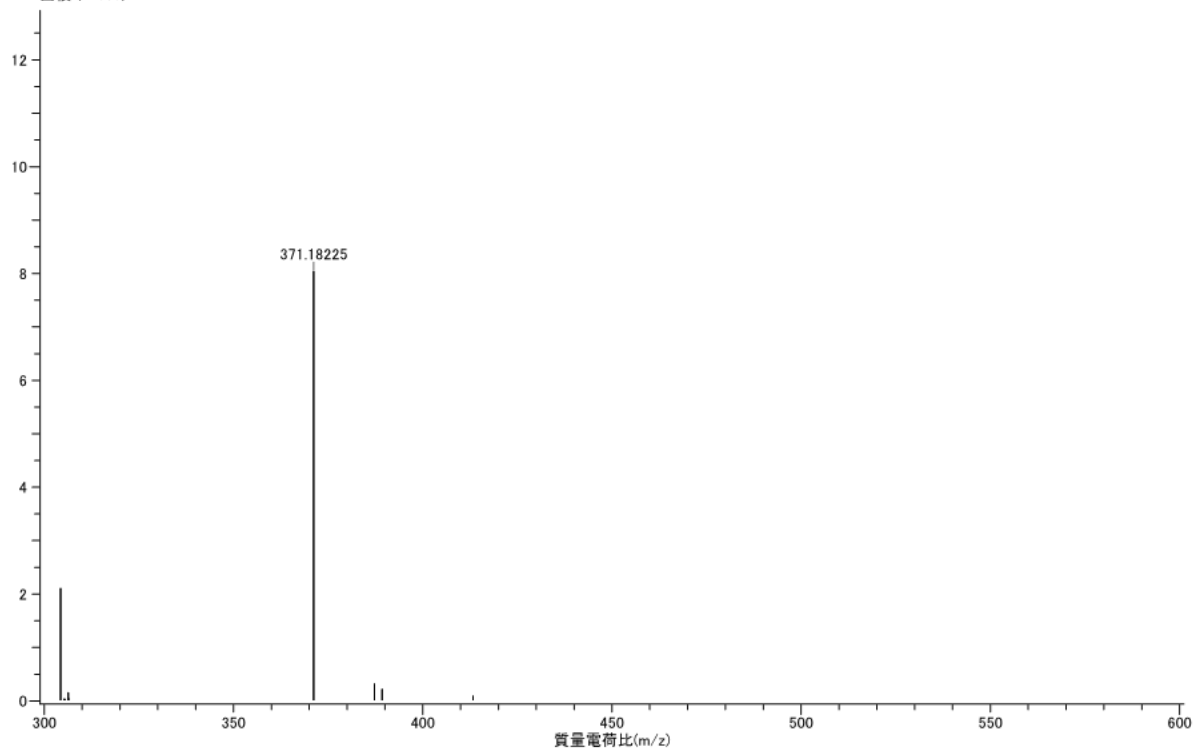

The HRESIMS spectrum of compound **10**

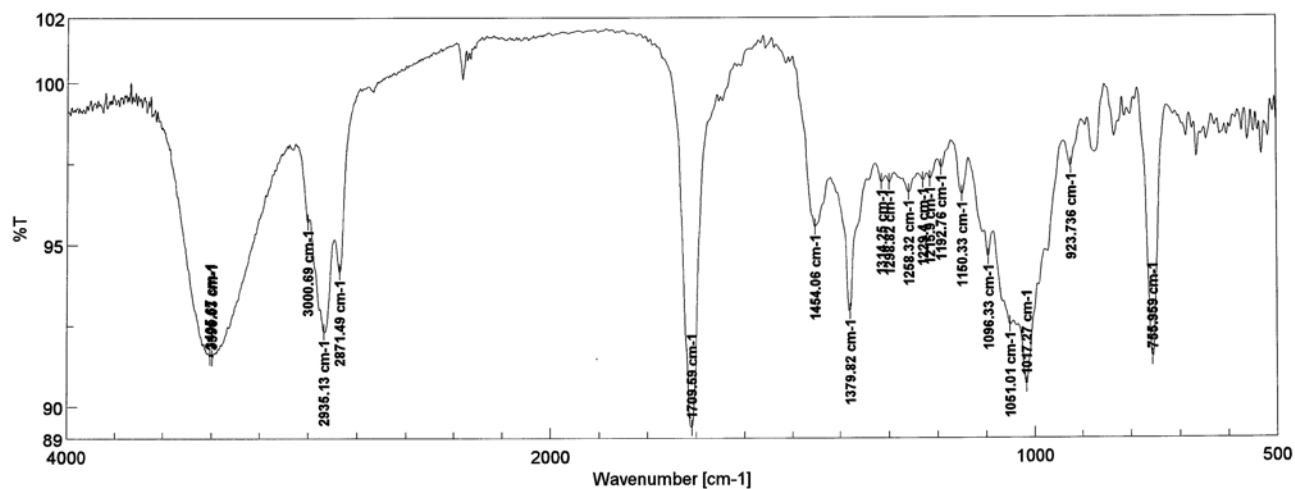

[コメント情報]  
 試料名  
 コメント  
 測定者  
 所属  
 会社

KS-7  
 B  
 東邦大学 薬学部

[測定情報]  
 機種名  
 シリアル番号

FT/IR-4100typeA  
 B109261016

光源 標準光源  
 検出器 TGS  
 積算回数 Auto (186)  
 分解 4 cm<sup>-1</sup>  
 ゼロファイリング On  
 アポダイゼーション Cosine  
 ゲイン Auto (16)  
 アパーチャ Auto (7.1 mm)  
 スキャンスピード Auto (2 mm/sec)  
 フィルタ Auto (30000 Hz)

Memory-2

[データ情報]  
 作成日時  
 データタイプ  
 横軸  
 縦軸  
 スタート  
 エンド  
 データ間隔  
 データ数

2017/07/26 14:22  
 等間隔データ  
 Wavenumber [cm<sup>-1</sup>]  
 %T  
 0 cm<sup>-1</sup>  
 7800.65 cm<sup>-1</sup>  
 0.964233 cm<sup>-1</sup>  
 8091

The IR spectrum of compound **10**

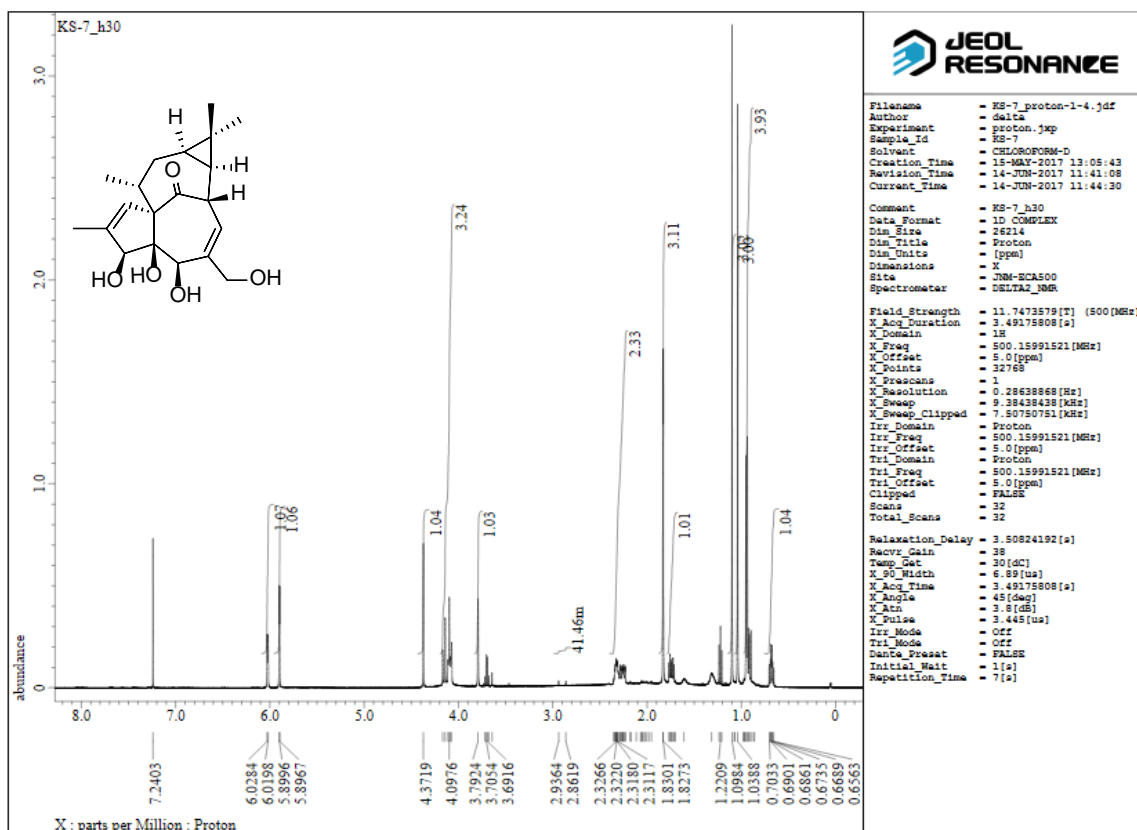

The  $^1\text{H}$  spectrum of compound 10

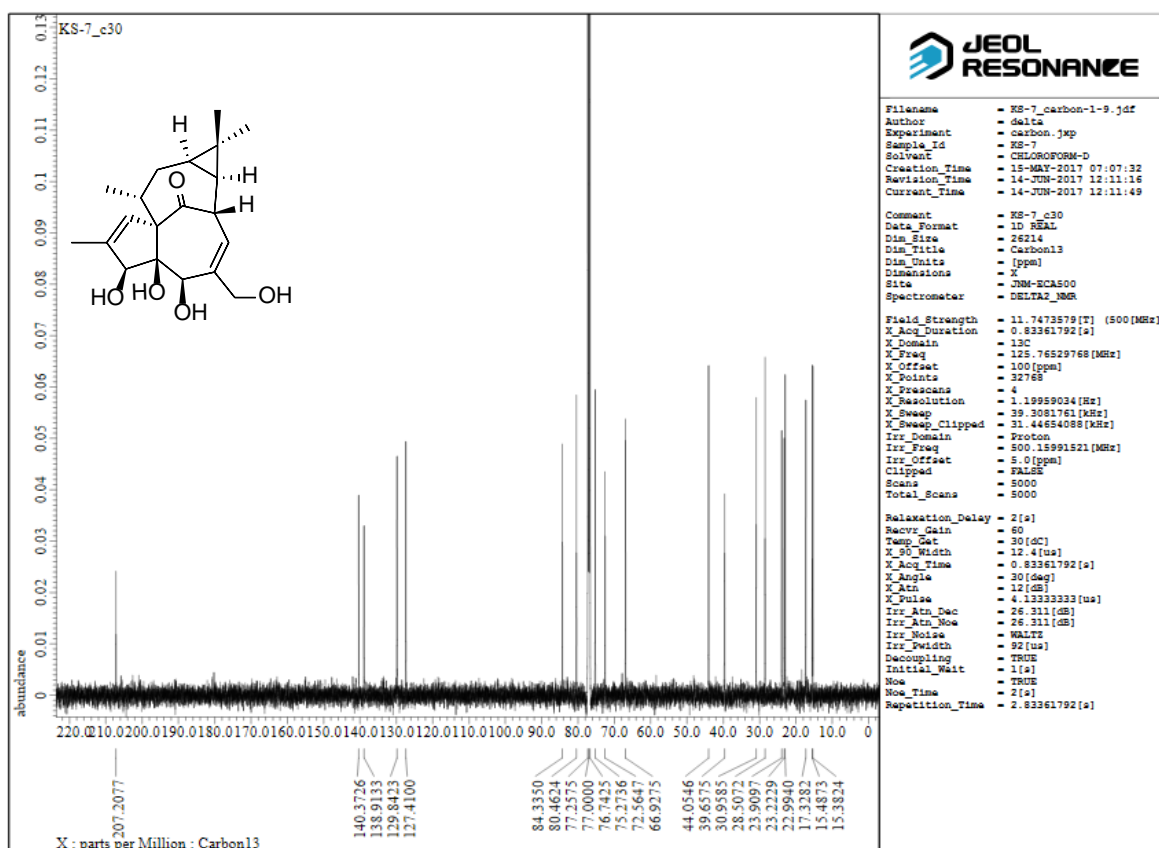

The  $^{13}\text{C}$  spectrum of compound 10

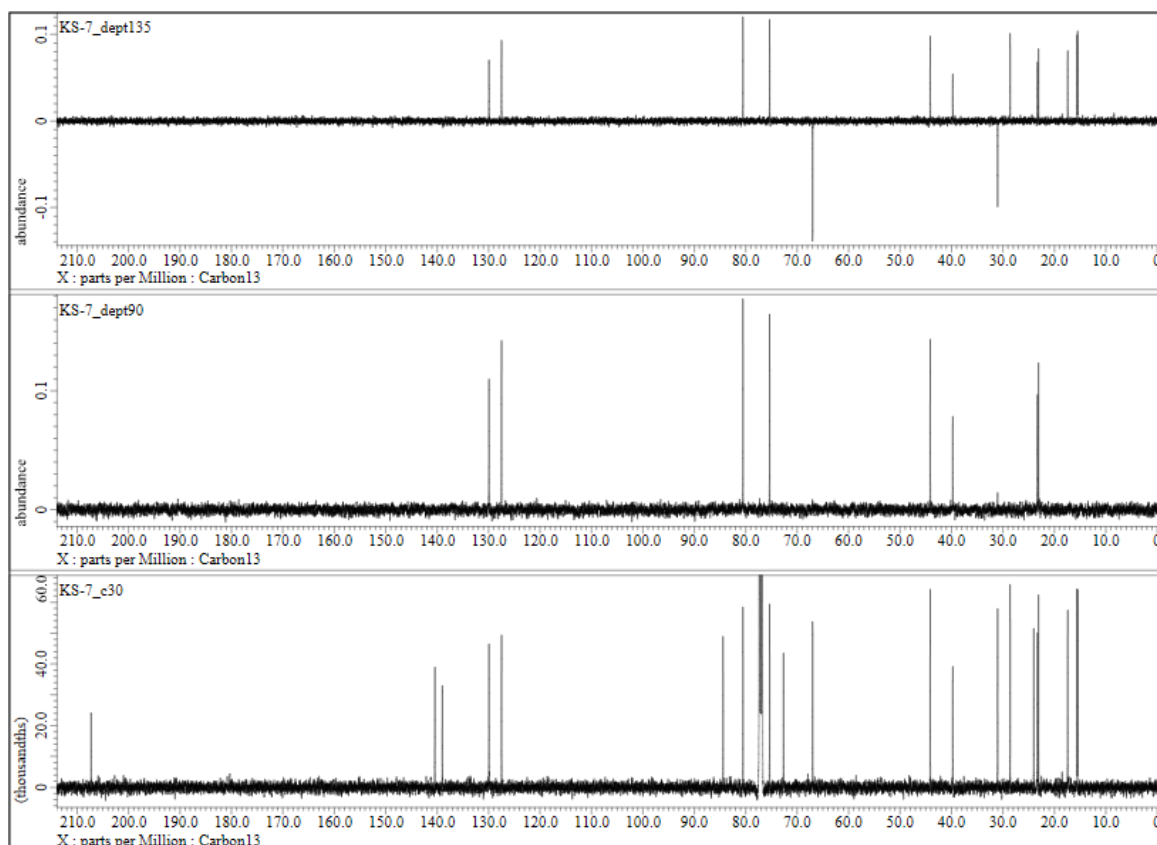

The DEPT spectrum of compound 10

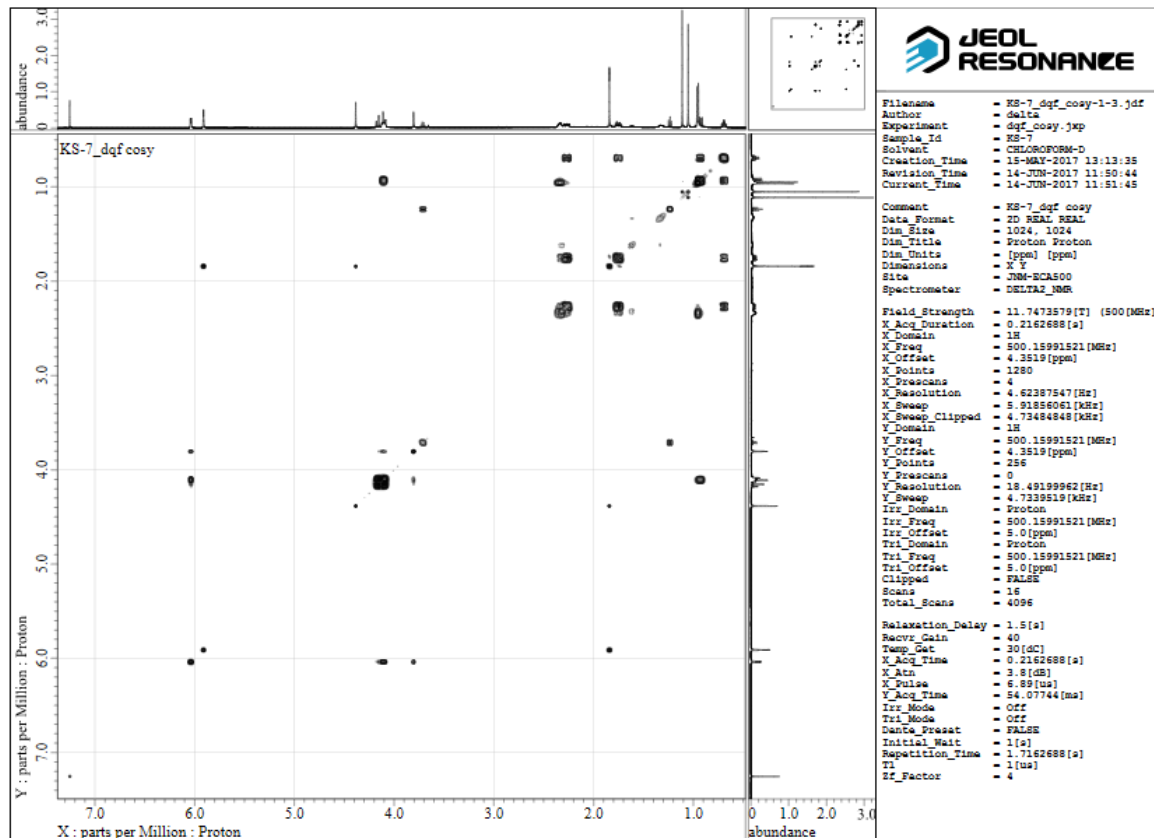

The DQF-COSY spectrum of compound 10

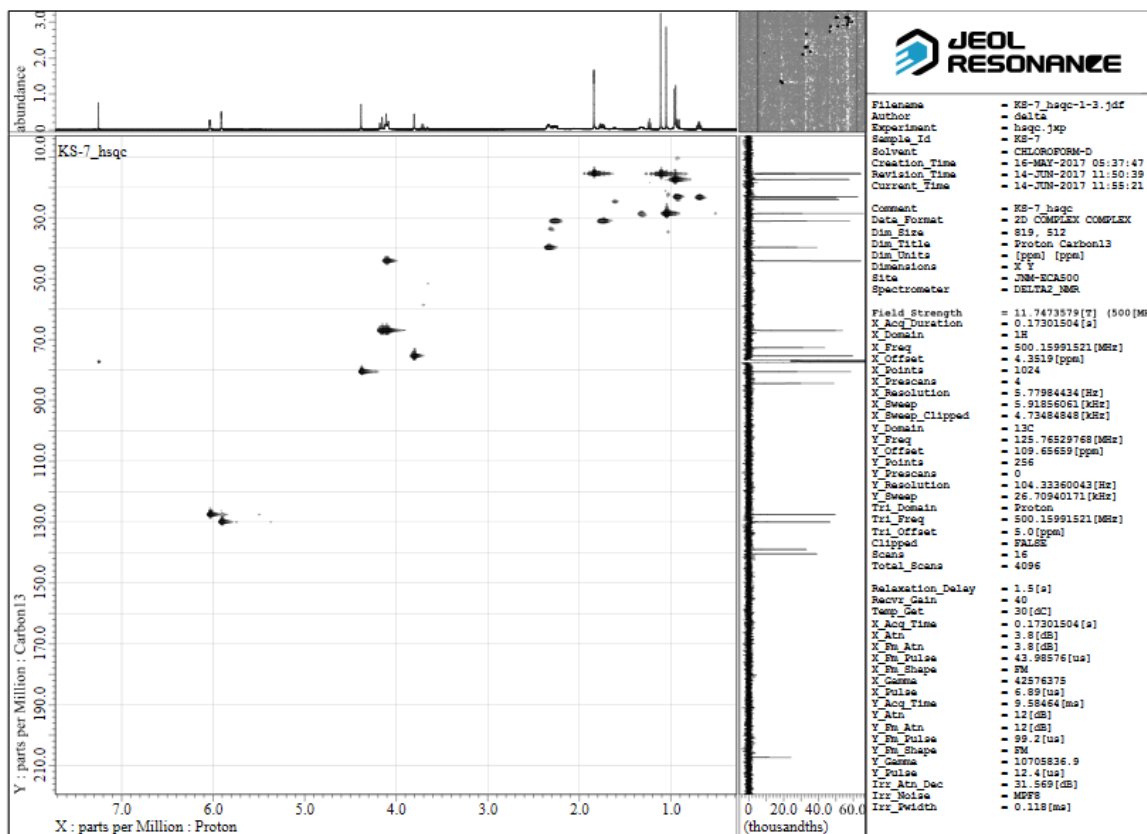

The HSQC spectrum of compound 10

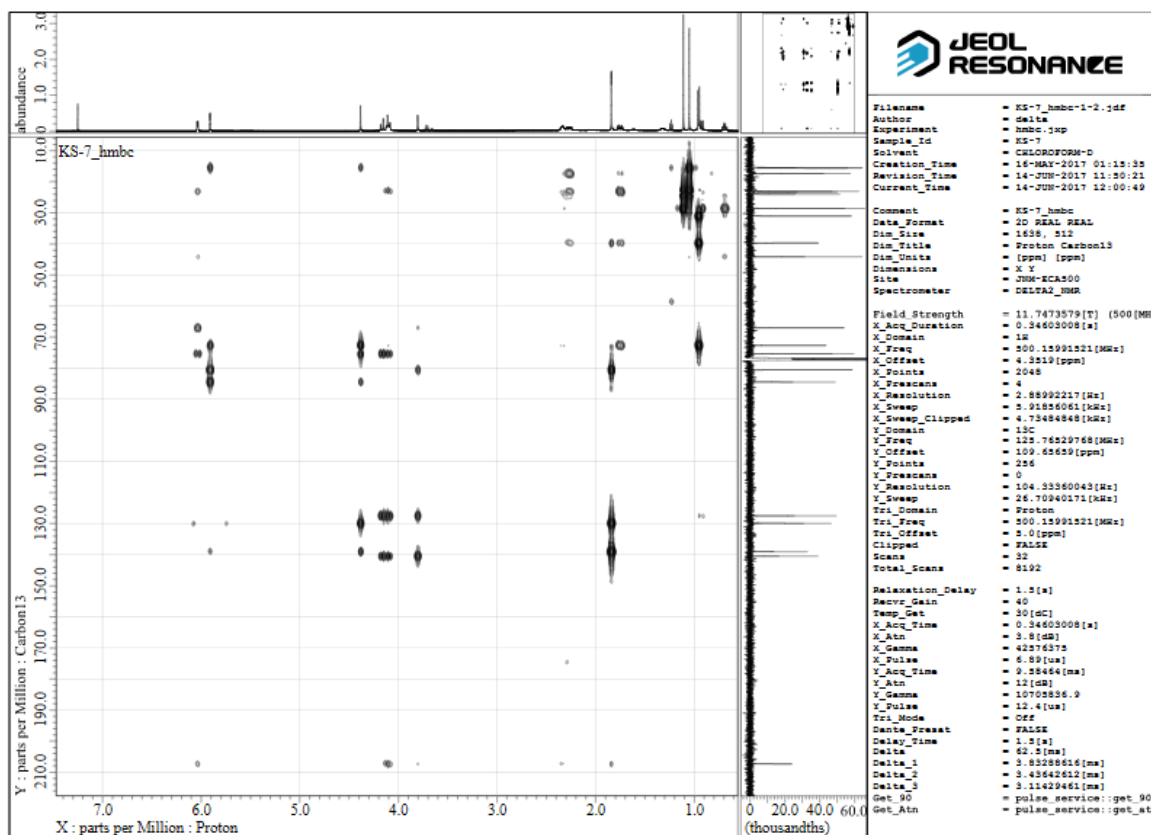

The HMBC spectrum of compound 10

測定データ名: ks-1  
 作成条件: 平均(MS[1]) 経過時間: 0.78..1.53

実験日時: 2017/10/07 15:50:45  
 イオン化モード: ESI+

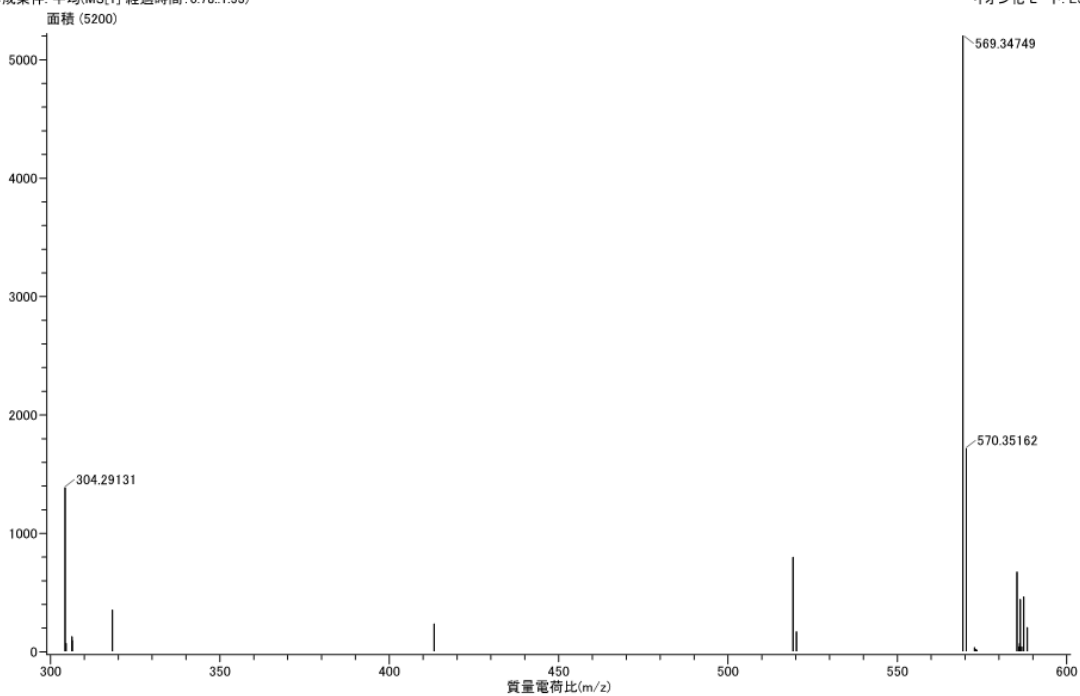

The HRESIMS spectrum of compound **11**

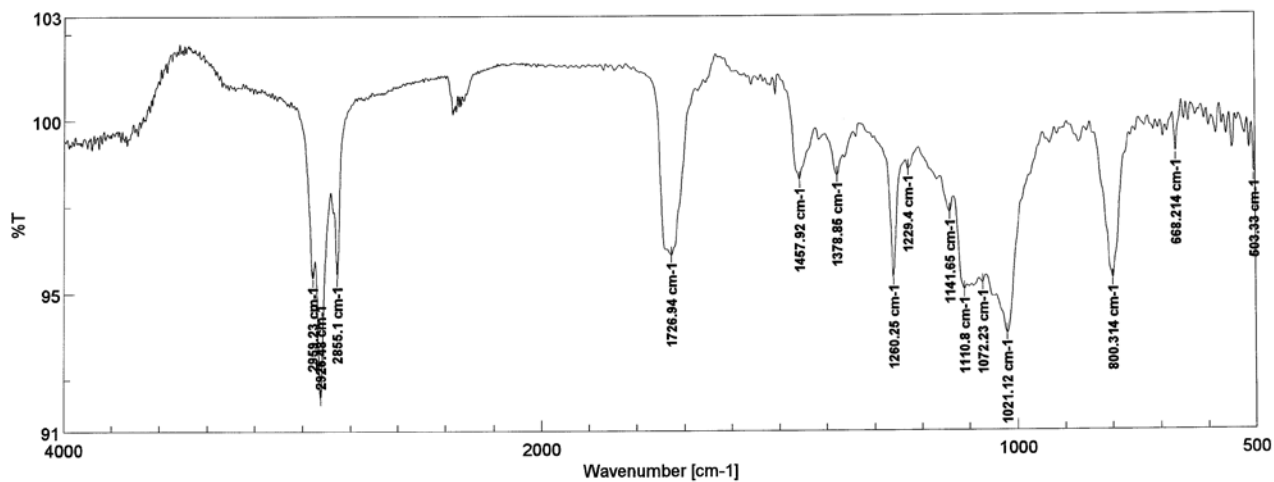

[コメント情報]  
 試料名 KS-1  
 コメント  
 測定者 B  
 所属 東邦大学 薬学部  
 会社

[データ情報]  
 作成日時 2017/07/26 11:03  
 データタイプ 等間隔データ  
 横軸 Wavenumber [cm-1]  
 縦軸 %T  
 スタート 0 cm-1  
 エンド 7800.65 cm-1  
 データ間隔 0.964233 cm-1  
 データ数 8091

[測定情報] FT/IR-4100typeA  
 機種名 B109261016  
 シリアル番号

光源 標準光源  
 検出器 TGS  
 積算回数 Auto (206)  
 分解 4 cm-1  
 ゼロフィリング On  
 アポダイゼーション Cosine  
 ゲイン Auto (16)  
 アパーチャー Auto (7.1 mm)  
 スキャンスピード Auto (2 mm/sec)  
 フィルタ Auto (30000 Hz)

KS-1,2

The IR spectrum of compound **11**

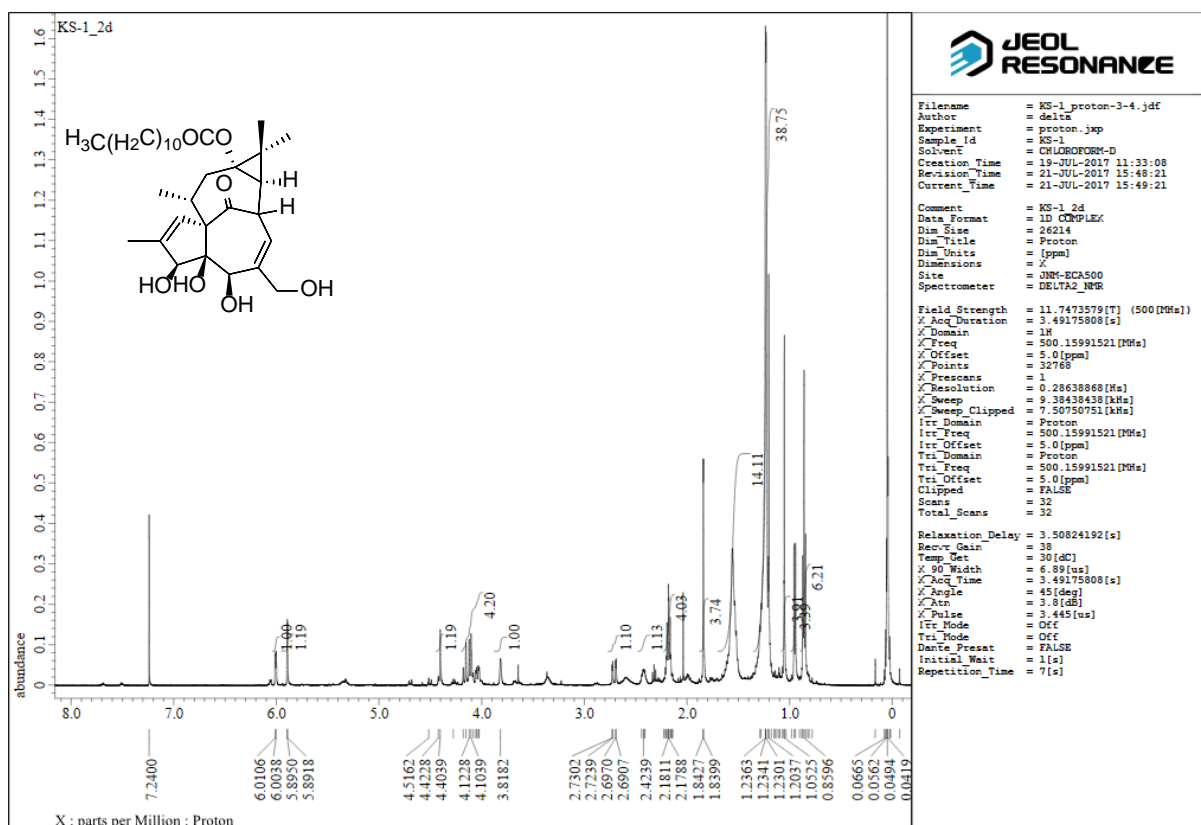

The  $^1\text{H}$  spectrum of compound **11**

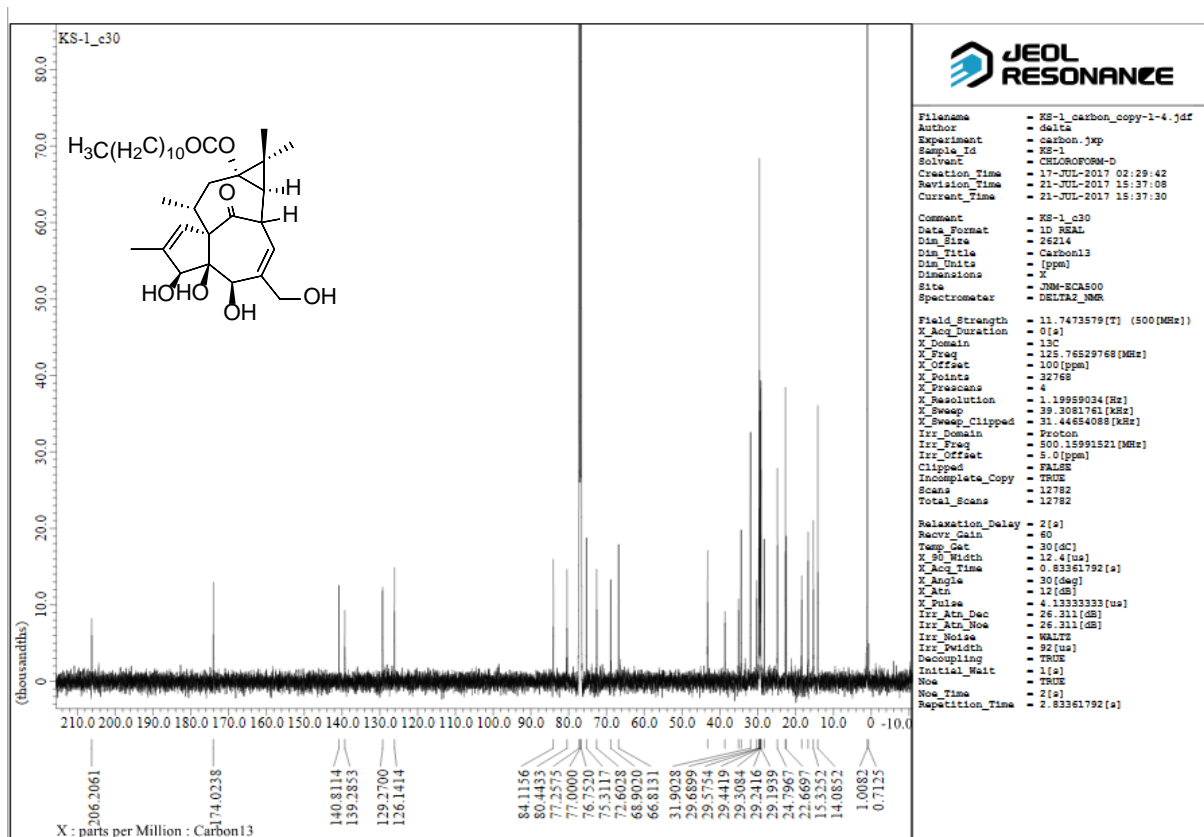

The  $^{13}\text{C}$  spectrum of compound **11**

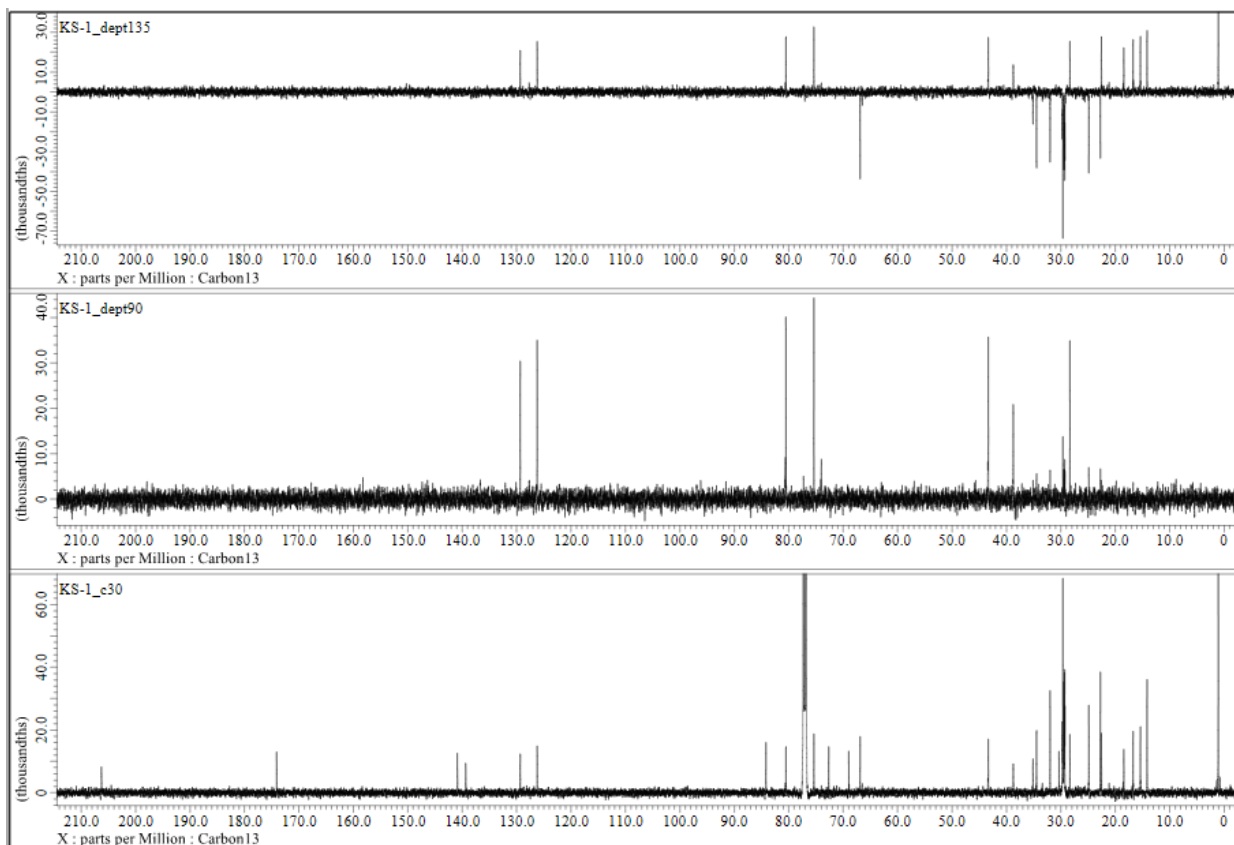

The DEPT spectrum of compound 11

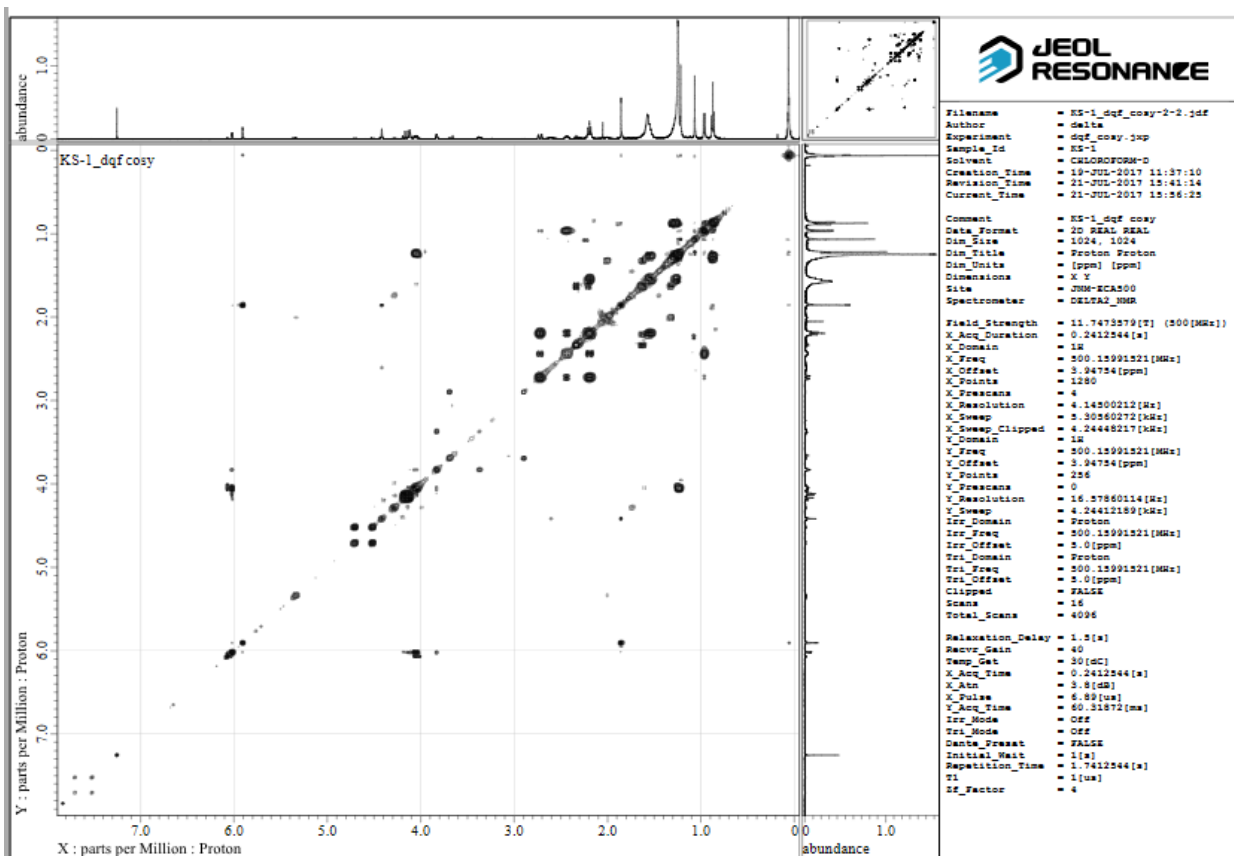

The DQF-COSY spectrum of compound 11



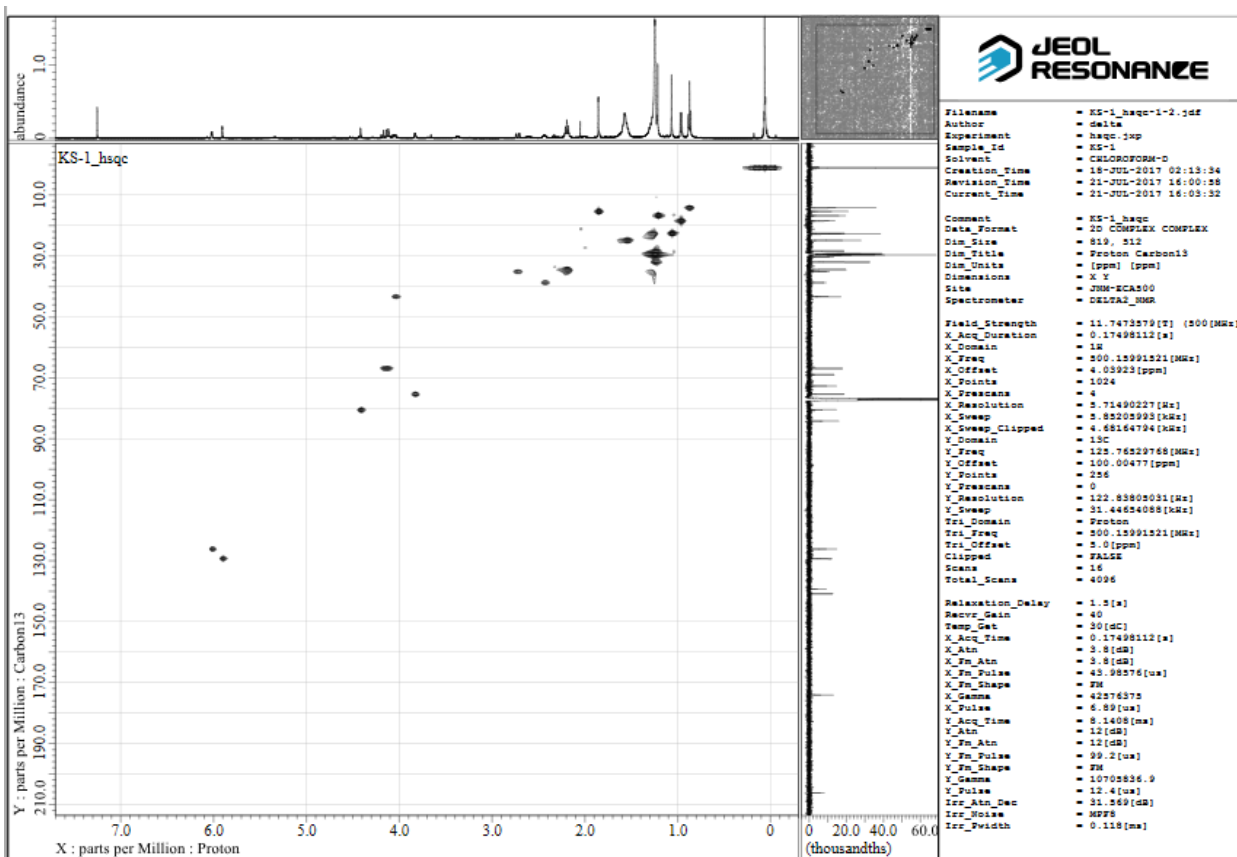

The HSQC spectrum of compound **11**

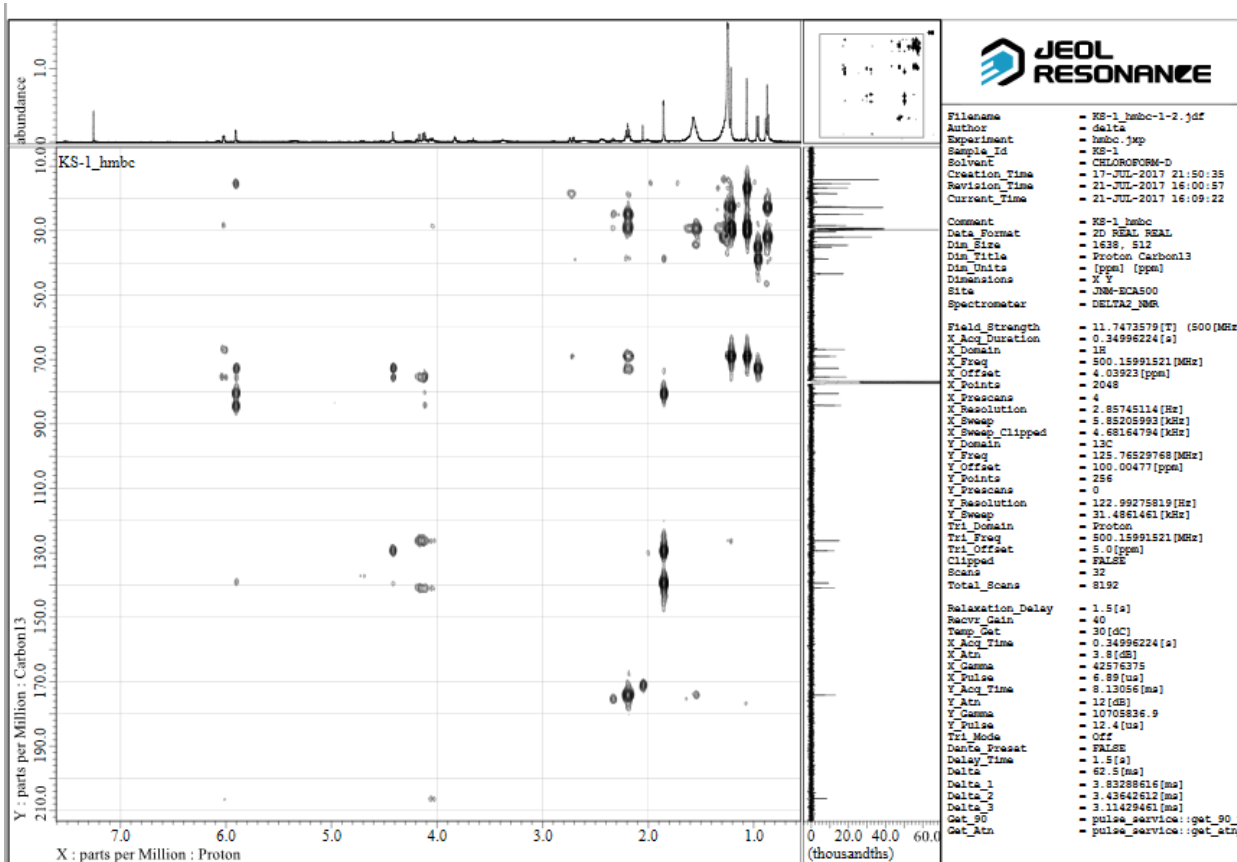

The HMBC spectrum of compound **11**

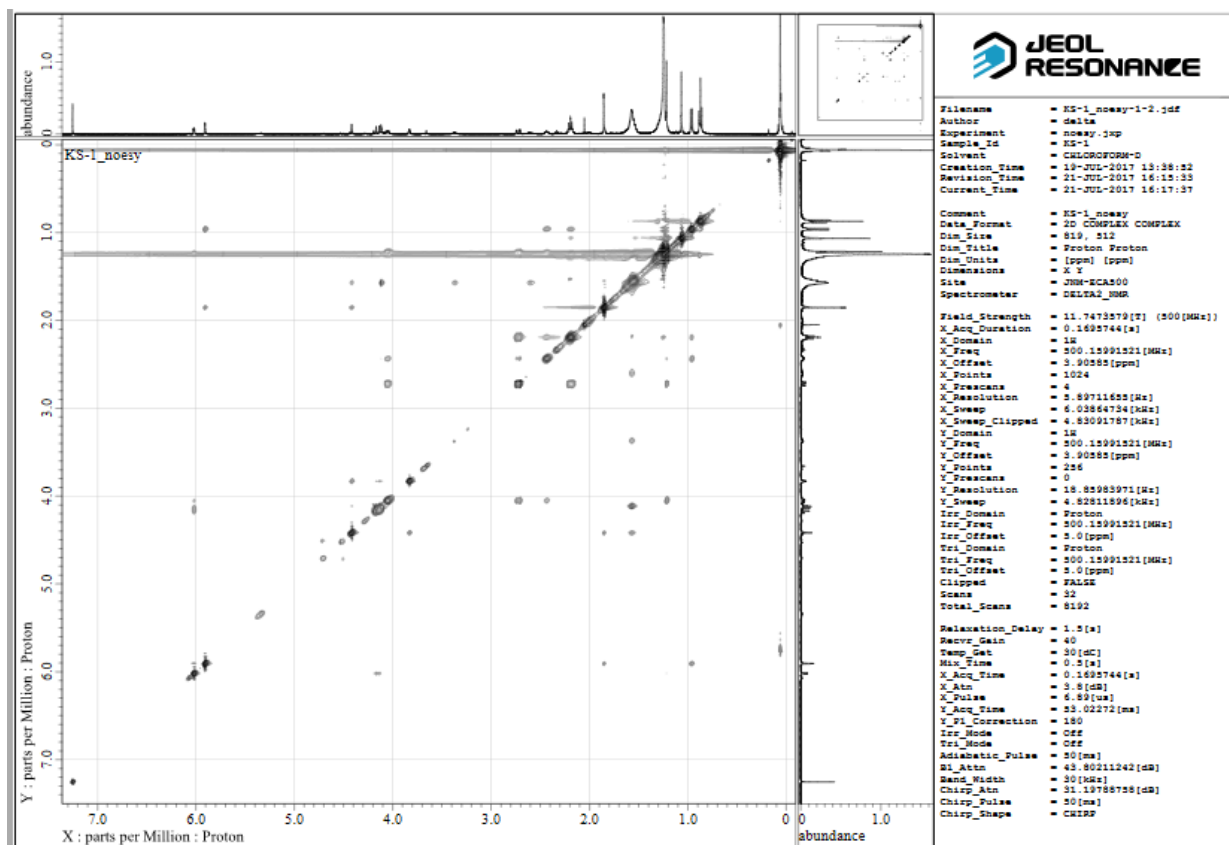

The NOESY spectrum of compound **11**

[ Mass Spectrum ]  
 Data : KS-6+Na-FABpHR2-NBA Date : 22-Aug-2017 17:01  
 Instrument : MSStation  
 Sample : KS-6  
 Note : -  
 Inlet : Direct Ion Mode : FAB+  
 Spectrum Type : Normal Ion [EP-Linear]  
 RT : 3.69 min Scan# : 14 Temp : 3276.7 deg.C  
 BP : m/z 499.2252 Int. : 81.91 (858854)  
 Output m/z range : 410 to 550 Cut Level : 0.00 %

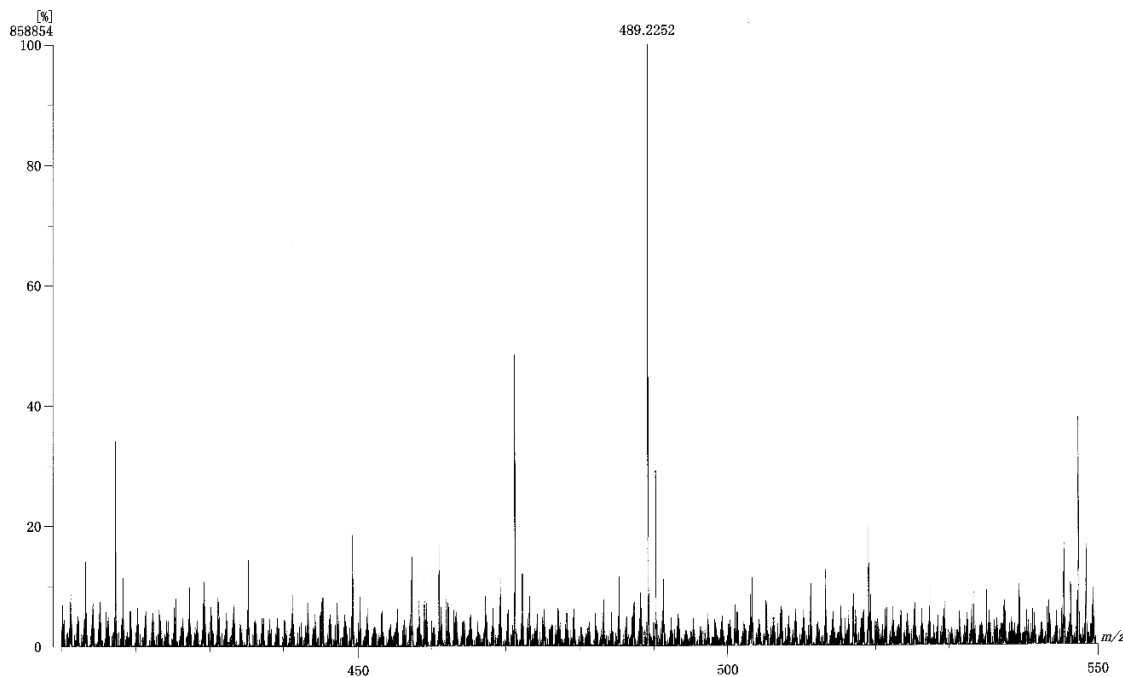

The HRFABMS spectrum of compound **12a**

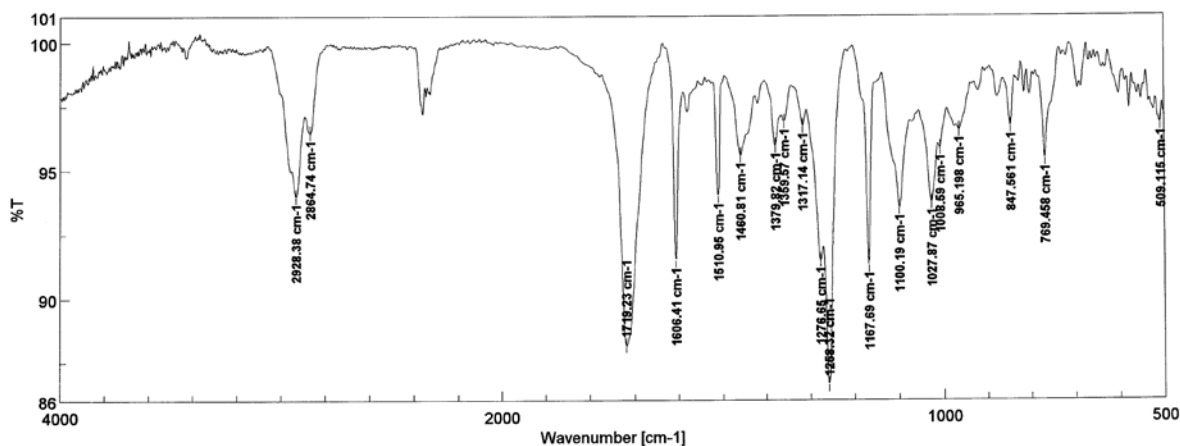

|                                                                                                                                                                                                                                                                                                                                                                       |                                                                                                                                                                                                                                                                                                                                                                        |               |
|-----------------------------------------------------------------------------------------------------------------------------------------------------------------------------------------------------------------------------------------------------------------------------------------------------------------------------------------------------------------------|------------------------------------------------------------------------------------------------------------------------------------------------------------------------------------------------------------------------------------------------------------------------------------------------------------------------------------------------------------------------|---------------|
| <p><b>[コメント情報]</b><br/>         試料名 KS-6<br/>         コメント<br/>         測定者 B<br/>         所属 東邦大学 薬学部 会社</p> <p><b>[データ情報]</b><br/>         作成日時 2017/07/26 14:08<br/>         データタイプ 等間隔データ<br/>         横軸 Wavenumber [cm-1]<br/>         縦軸 %T<br/>         スタート 0 cm-1<br/>         エンド 7800.65 cm-1<br/>         データ間隔 0.964233 cm-1<br/>         データ数 8091</p> | <p><b>[測定情報]</b><br/>         機種名 FT/IR-4100typeA<br/>         シリアル番号 B109261016</p> <p>光源 標準光源<br/>         検出器 TGS<br/>         積算回数 Auto (174)<br/>         分解 4 cm-1<br/>         ゼロフリンク On<br/>         アボダイゼーション Cosine<br/>         ゲイン Auto (16)<br/>         アパーチャー Auto (7.1 mm)<br/>         スキャンスピード Auto (2 mm/sec)<br/>         フィルタ Auto (30000 Hz)</p> | <p>KS-6.2</p> |
|-----------------------------------------------------------------------------------------------------------------------------------------------------------------------------------------------------------------------------------------------------------------------------------------------------------------------------------------------------------------------|------------------------------------------------------------------------------------------------------------------------------------------------------------------------------------------------------------------------------------------------------------------------------------------------------------------------------------------------------------------------|---------------|

The IR spectrum of compound 12a

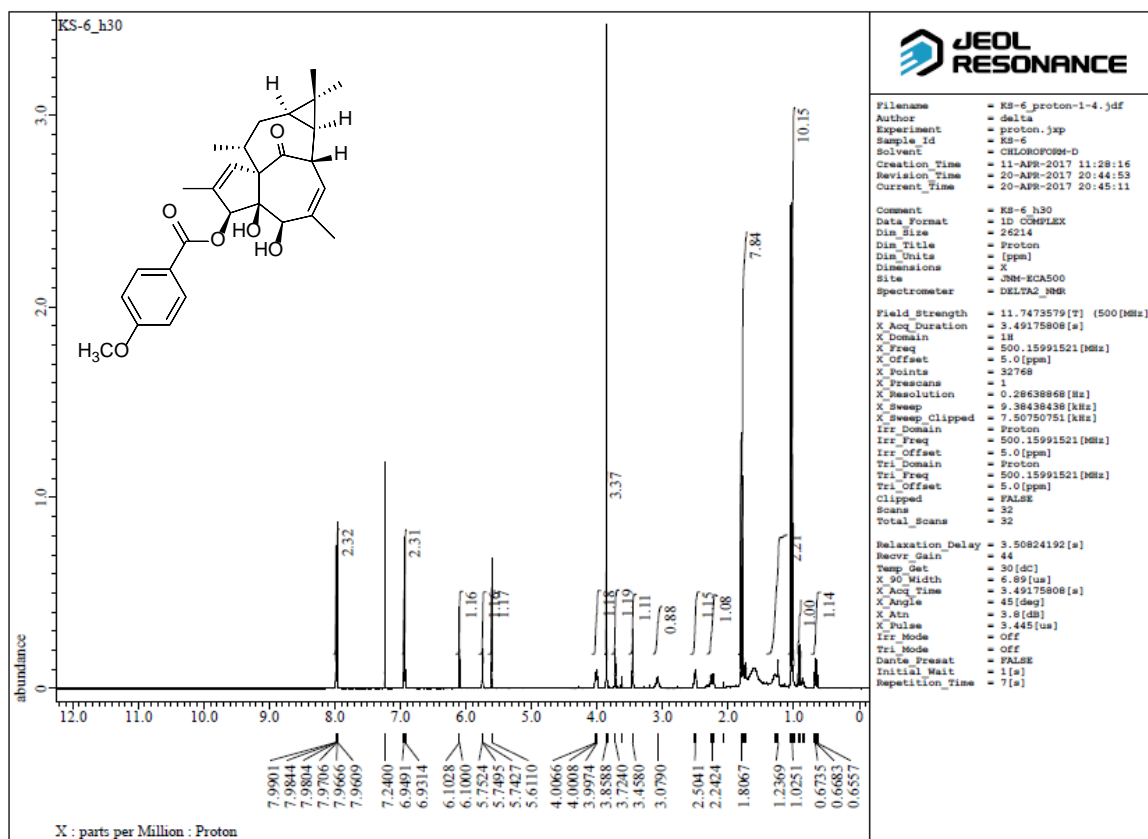

The <sup>1</sup>H spectrum of compound 12a

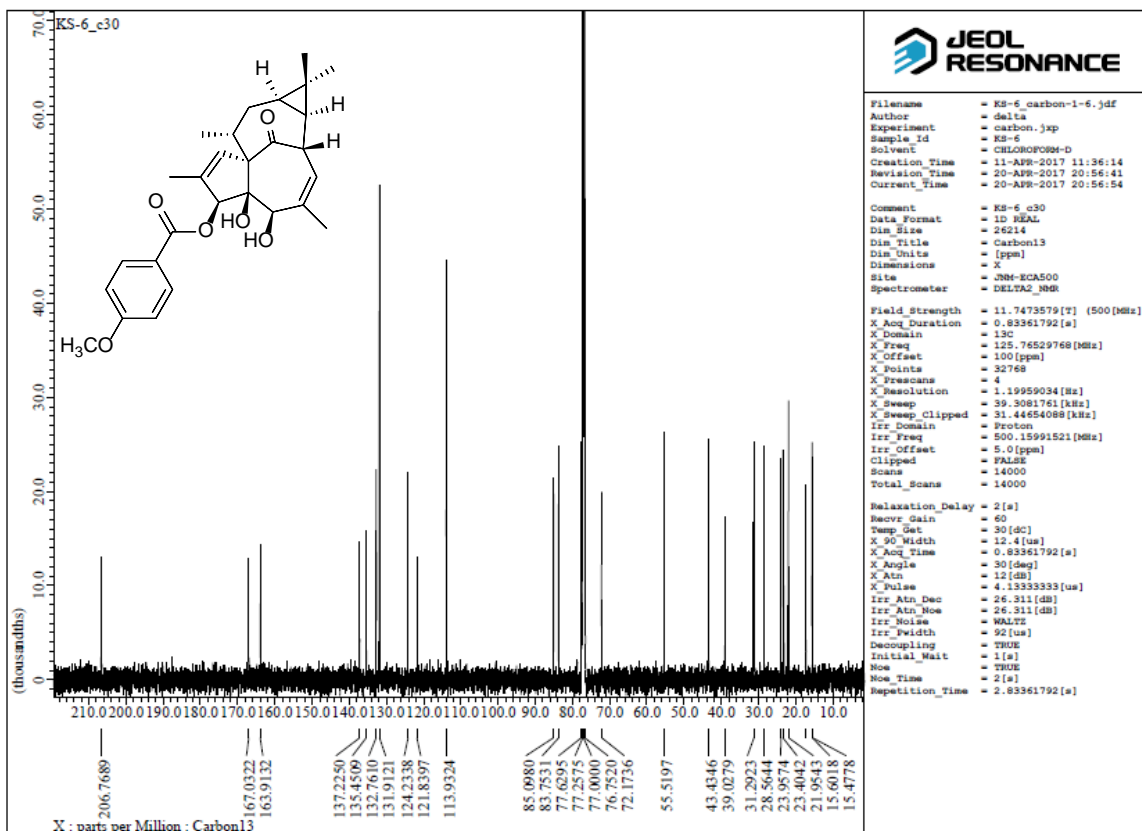

The <sup>13</sup>C spectrum of compound 12a

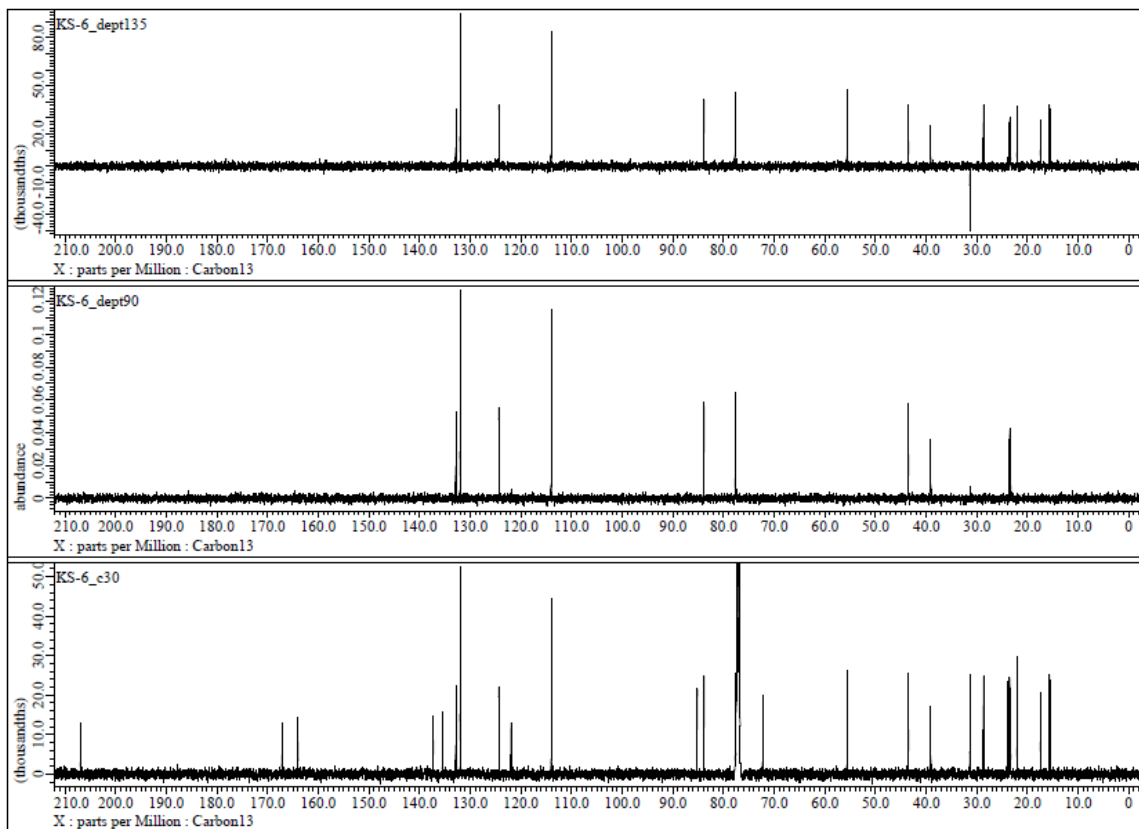

The DEPT spectrum of compound 12a

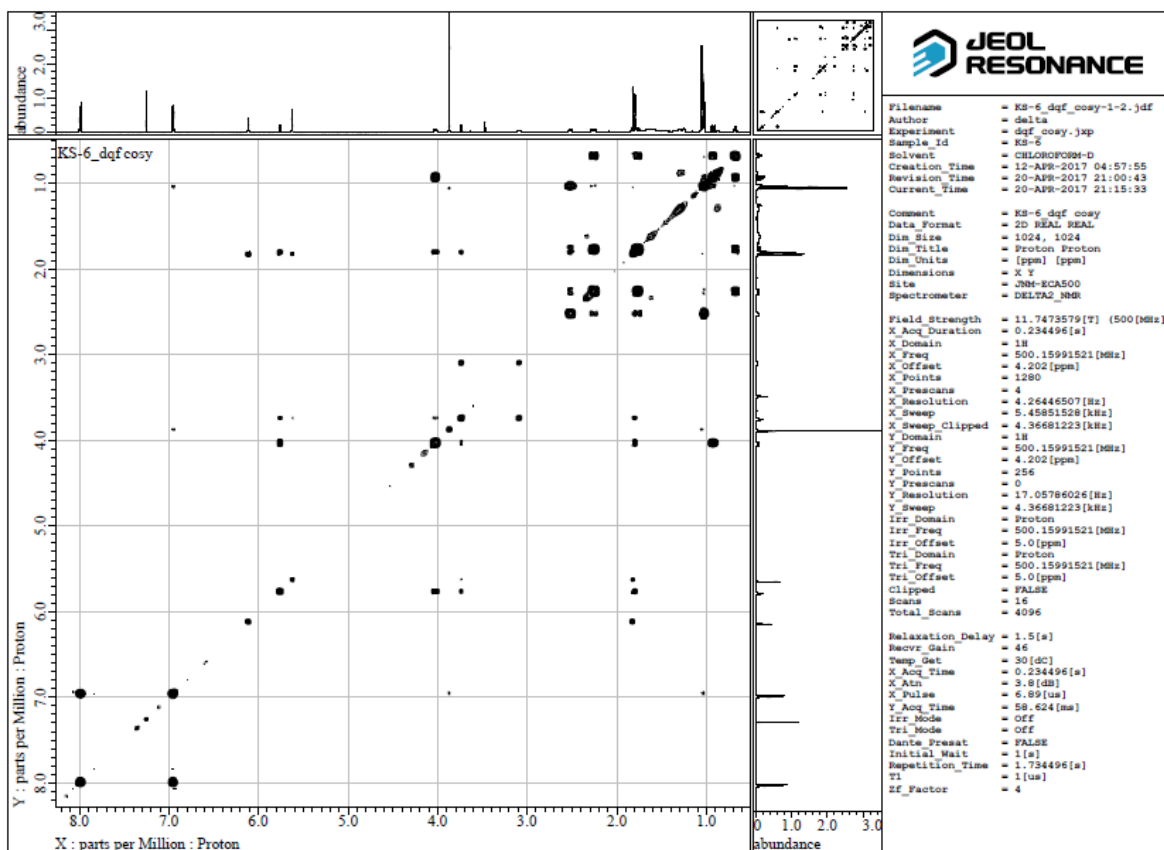

The DQF\_COSY spectrum of compound 12a

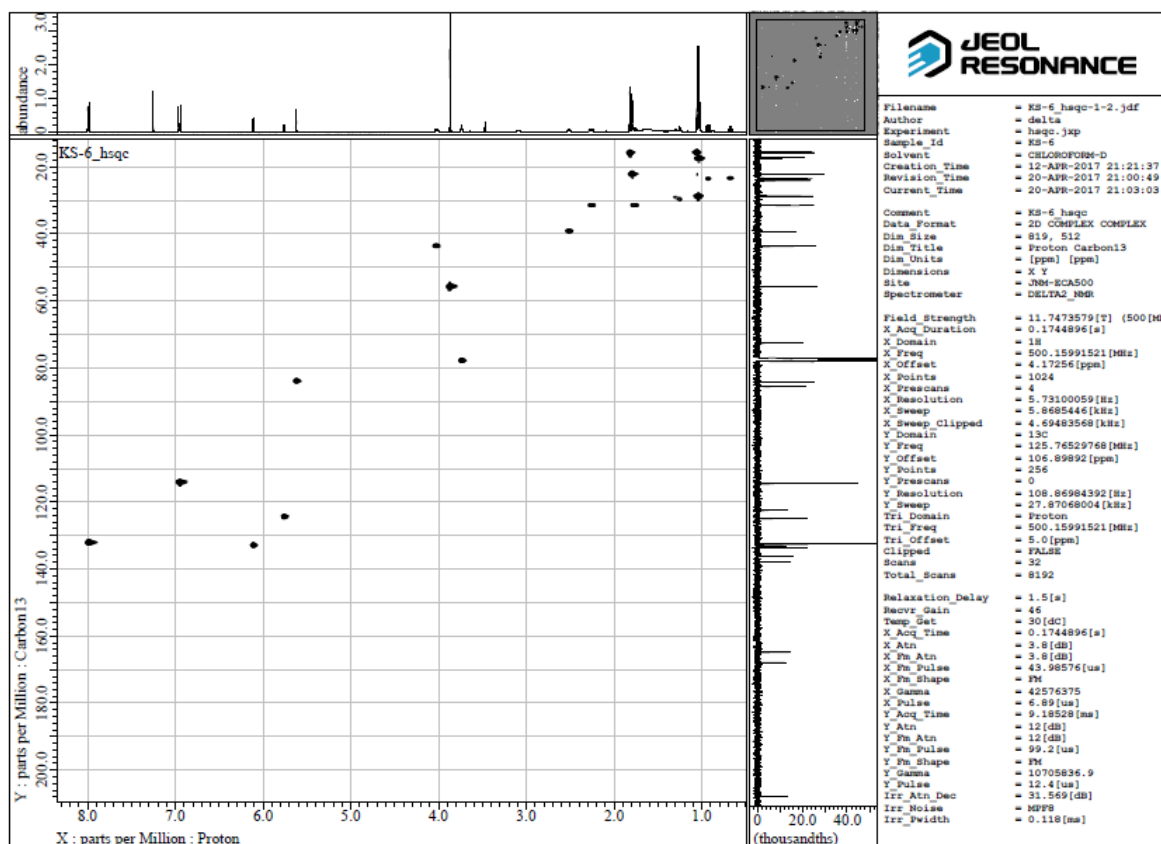

The HSQC spectrum of compound 12a

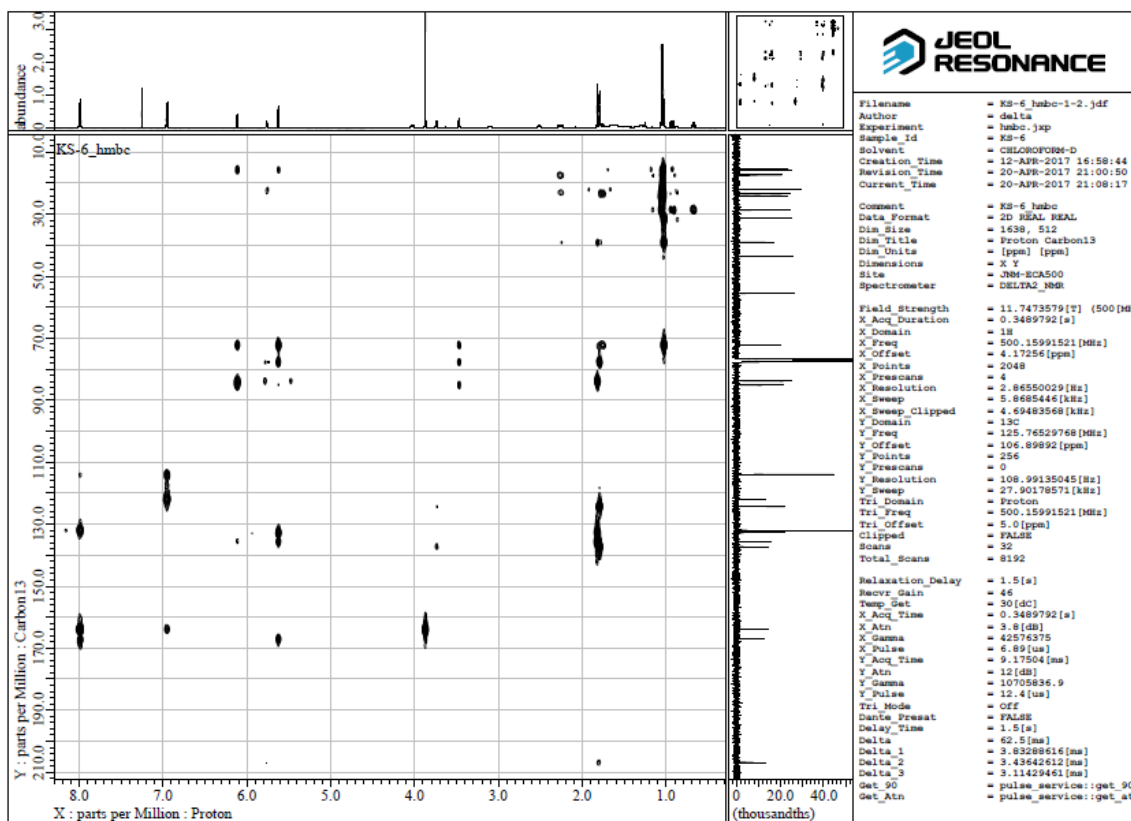

The HMBC spectrum of compound 12a

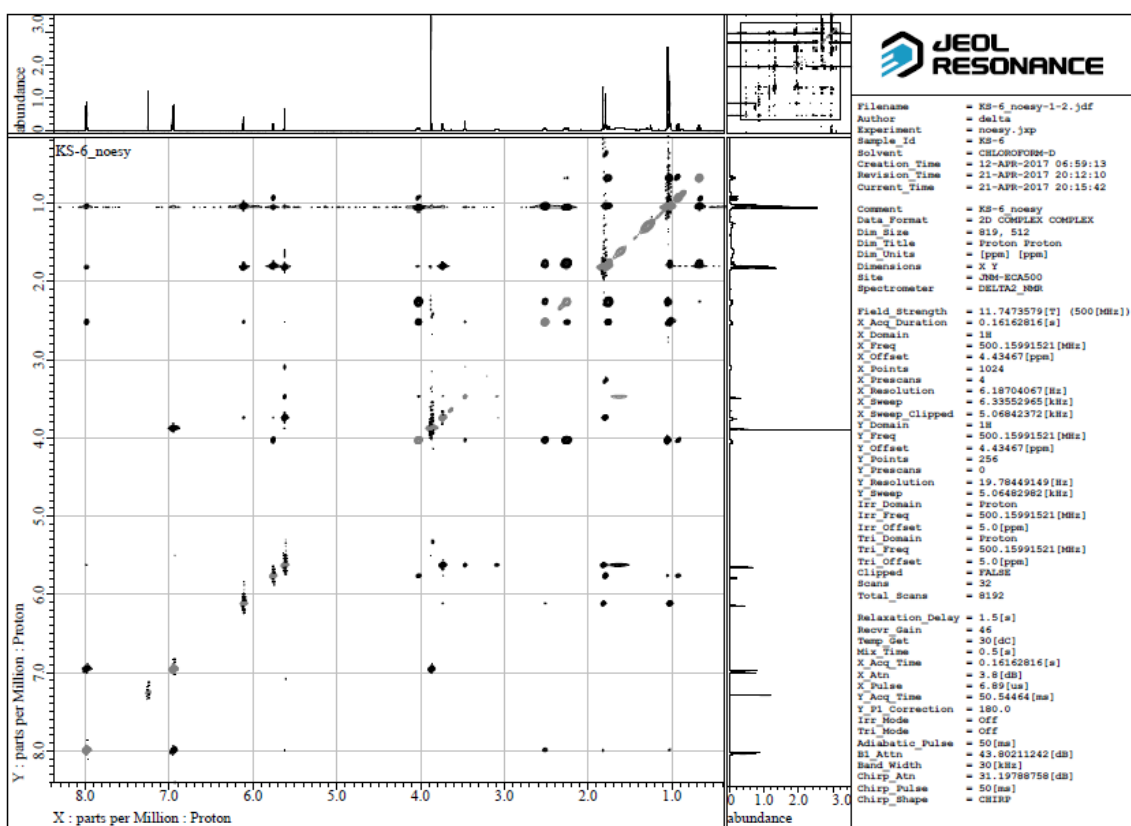

The NOESY spectrum of compound 12a

[ Mass Spectrum ]  
 Data : KS-5+Na-FABpHR-NBA Date : 22-Aug-2017 13:55  
 Instrument : MStation  
 Sample : KS-5  
 Note : -  
 Inlet : Direct Ion Mode : FAB+  
 Spectrum Type : Normal Ion [EF-Linear]  
 RT : 5.37 min Scan# : 20 Temp : 3276.7 deg.C  
 BP : m/z 489.2282 Int. : 193.46 (2028574)  
 Output m/z range : 410 to 550 Cut Level : 0.00 %

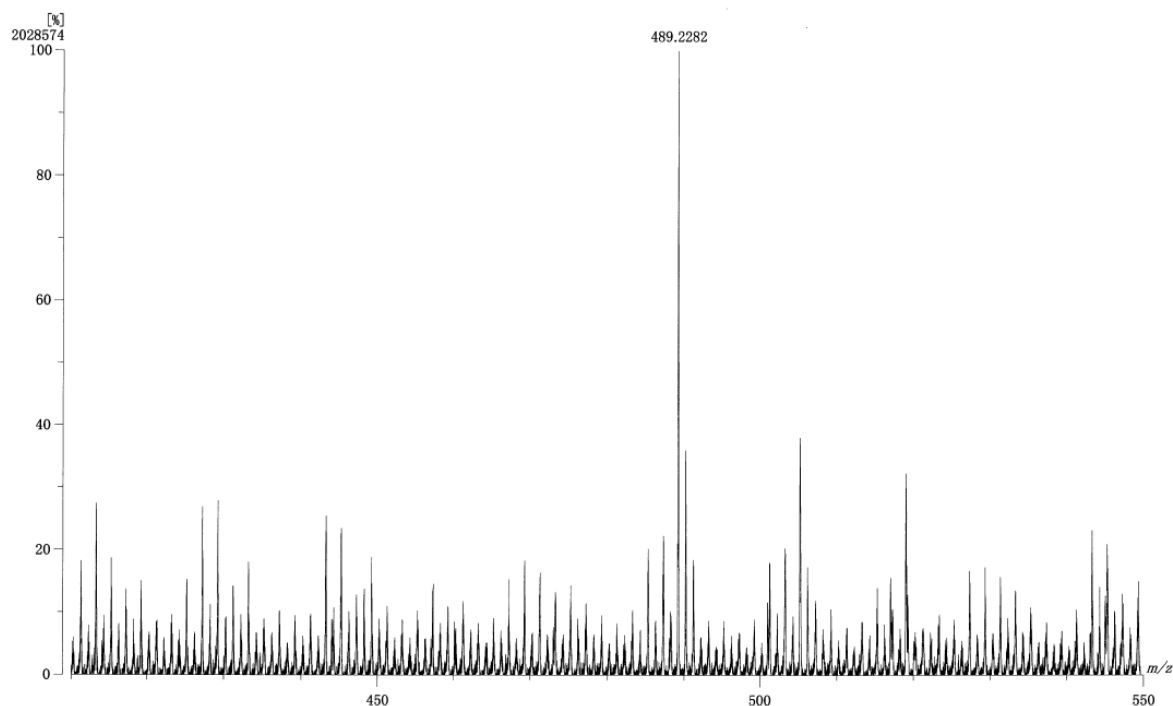

The HRFABMS spectrum of compound **12b**

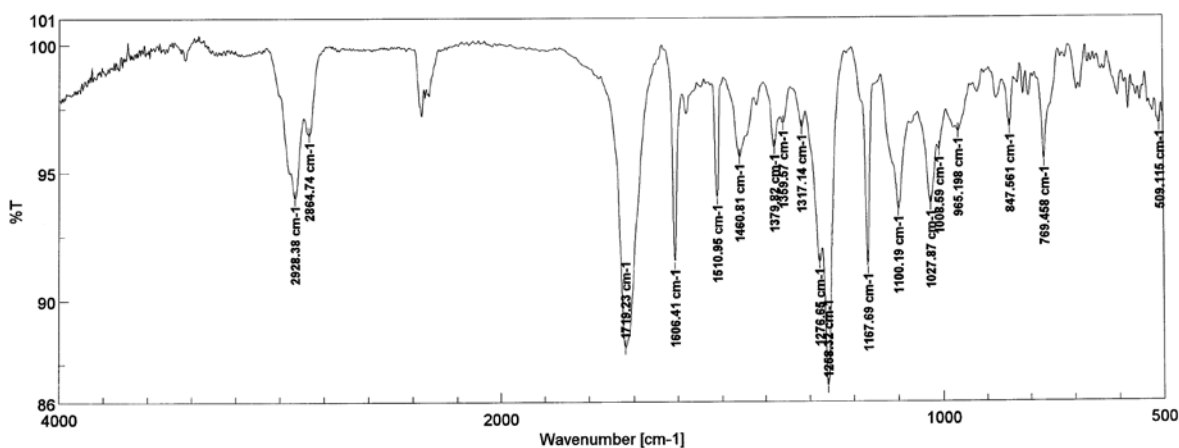

[コメント情報]  
 試料名 KS-6  
 コメント  
 測定者  
 所属 B  
 会社 東邦大学 薬学部

[データ情報]  
 作成日時 2017/07/26 14:08  
 データタイプ 等間隔データ  
 横軸 Wavenumber [cm-1]  
 縦軸 %T  
 スタート 0 cm-1  
 エンド 7800.65 cm-1  
 データ間隔 0.964233 cm-1  
 データ数 8091

[測定情報]  
 機種名 FT/IR-4100typeA  
 シリアル番号 B109261016

光源 標準光源  
 検出器 TGS  
 積算回数 Auto (174)  
 分解 4 cm-1  
 ゼロフリンギング On  
 アポダイゼーション Cosine  
 ゲイン Auto (16)  
 アパーチャー Auto (7.1 mm)  
 スキャンスピード Auto (2 mm/sec)  
 フィルタ Auto (30000 Hz)

KS-6\_2

The IR spectrum of compound **12b**



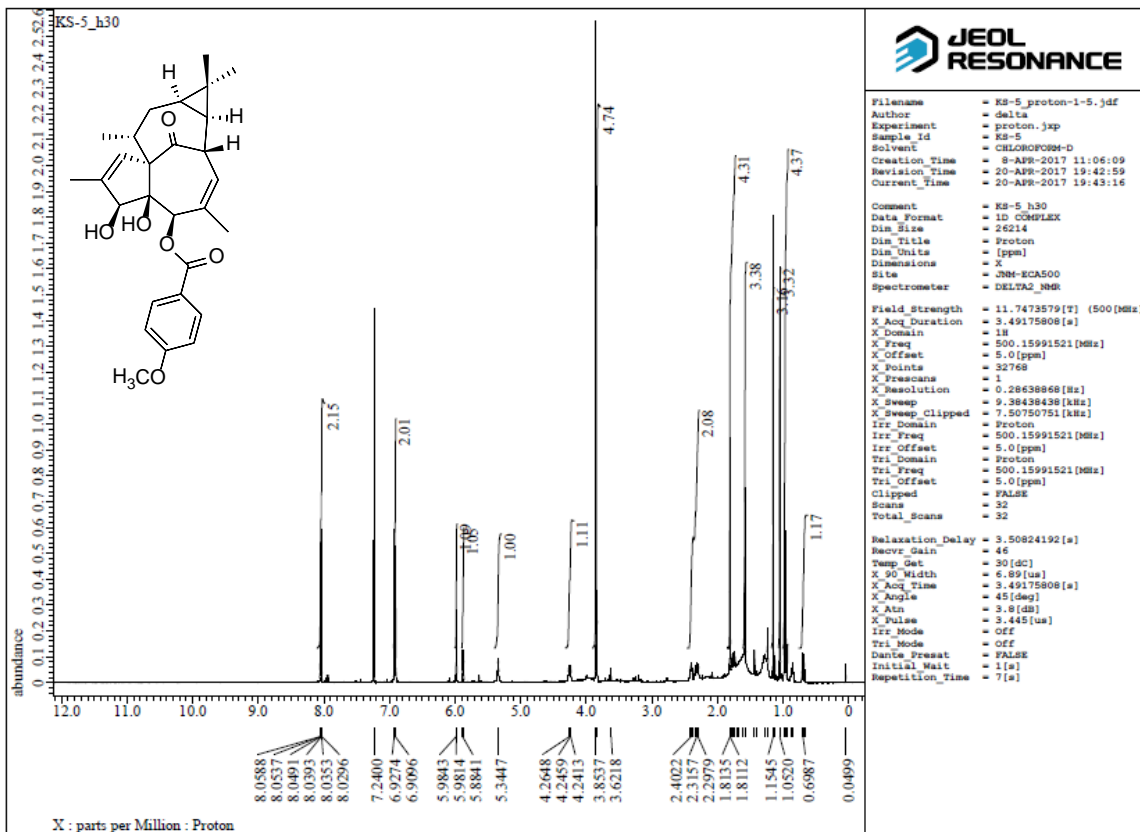

The  $^1\text{H}$  spectrum of compound 12b

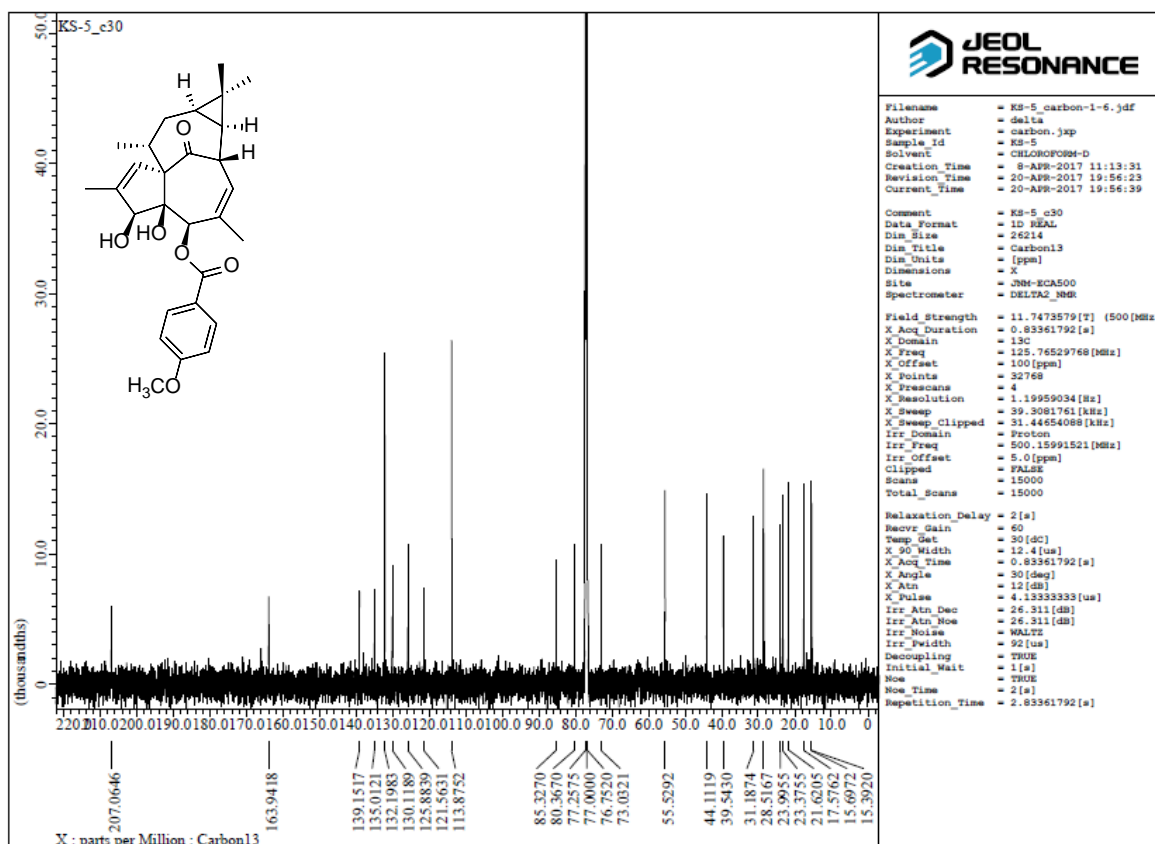

The  $^{13}\text{C}$  spectrum of compound 12b



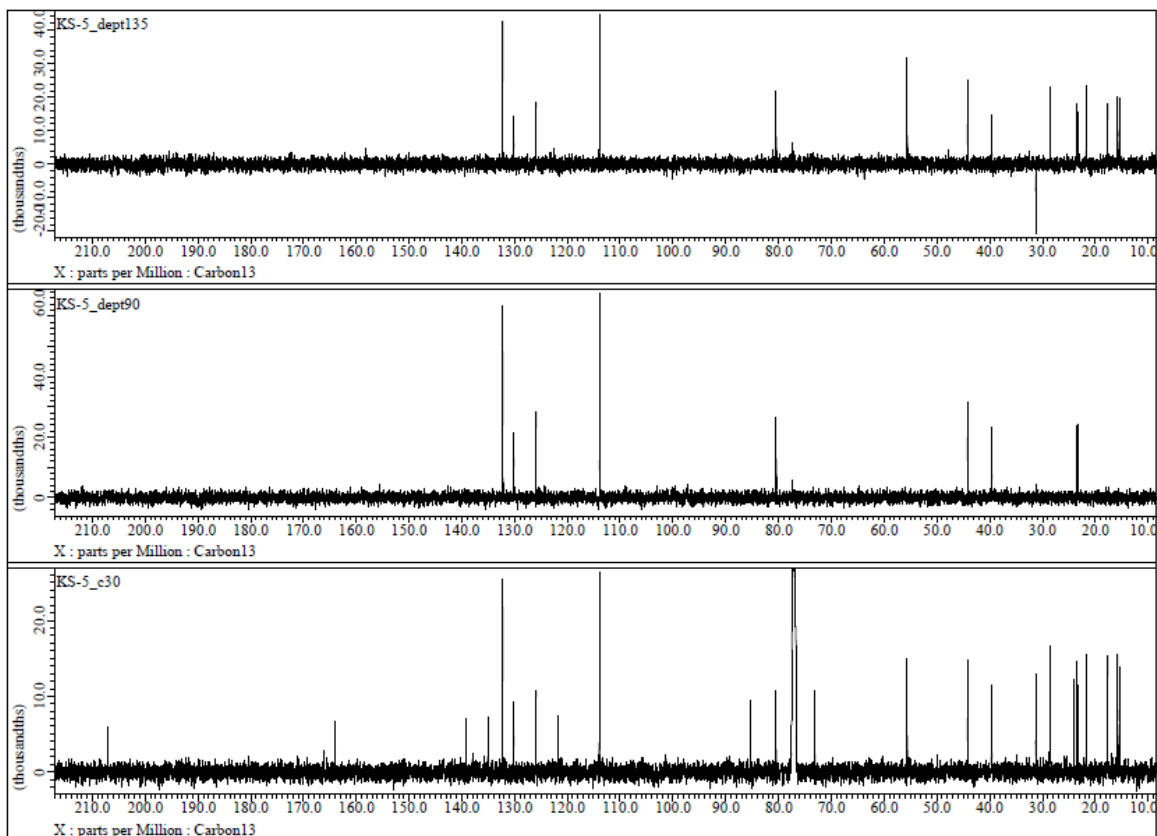

The DEPT spectrum of compound **12b**

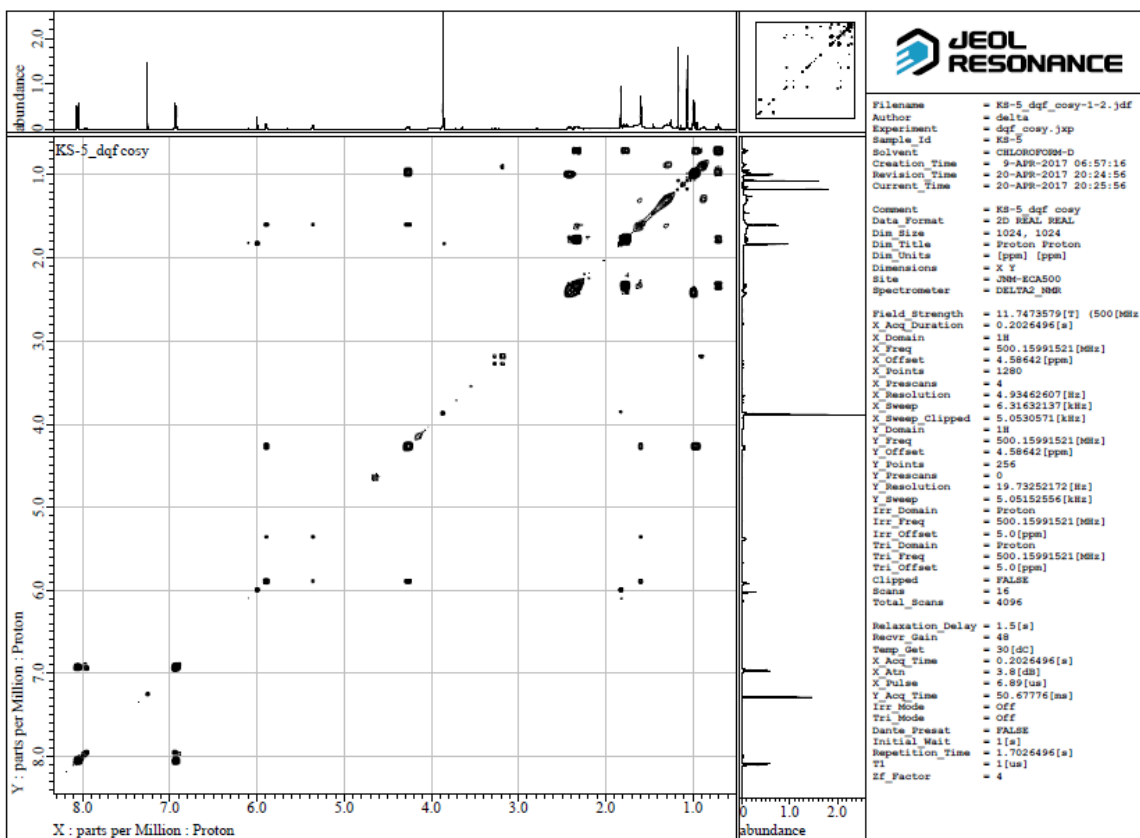

The DQF-COSY spectrum of compound **12b**

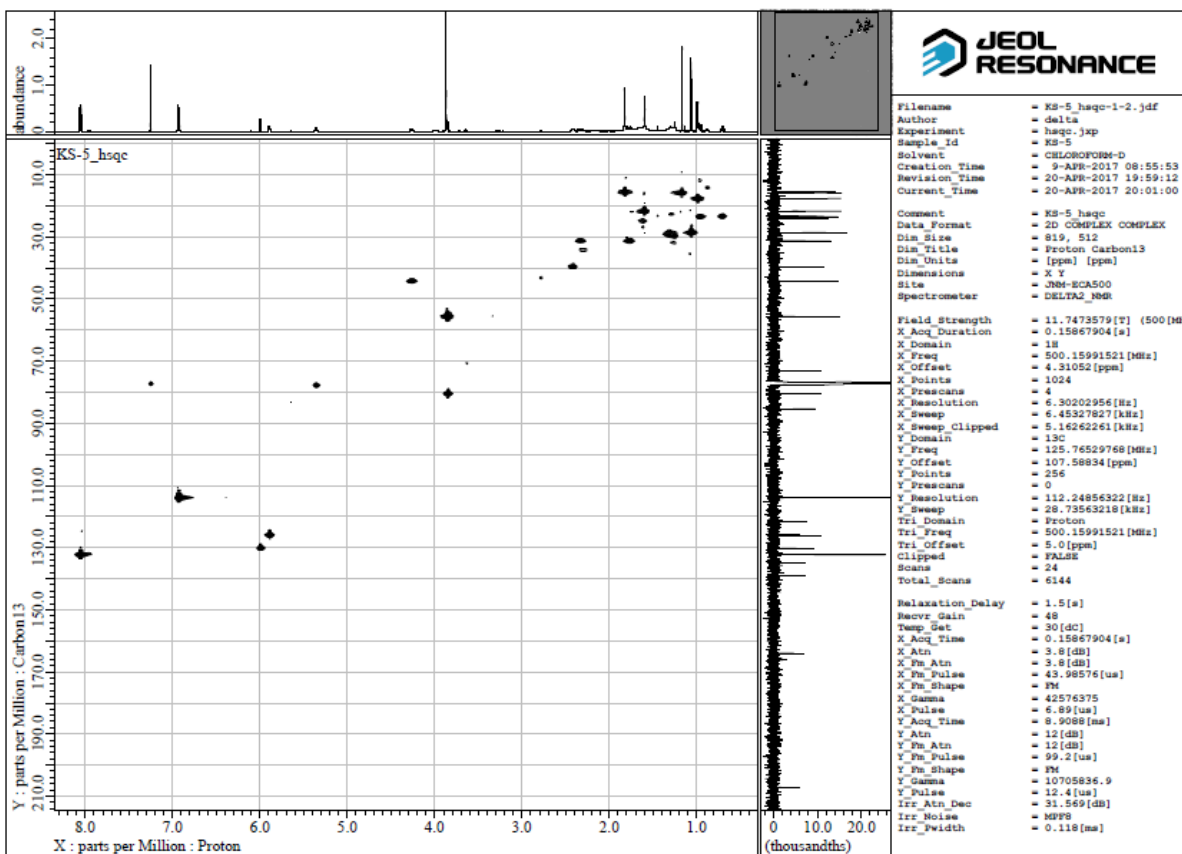

The HSQC spectrum of compound 12b

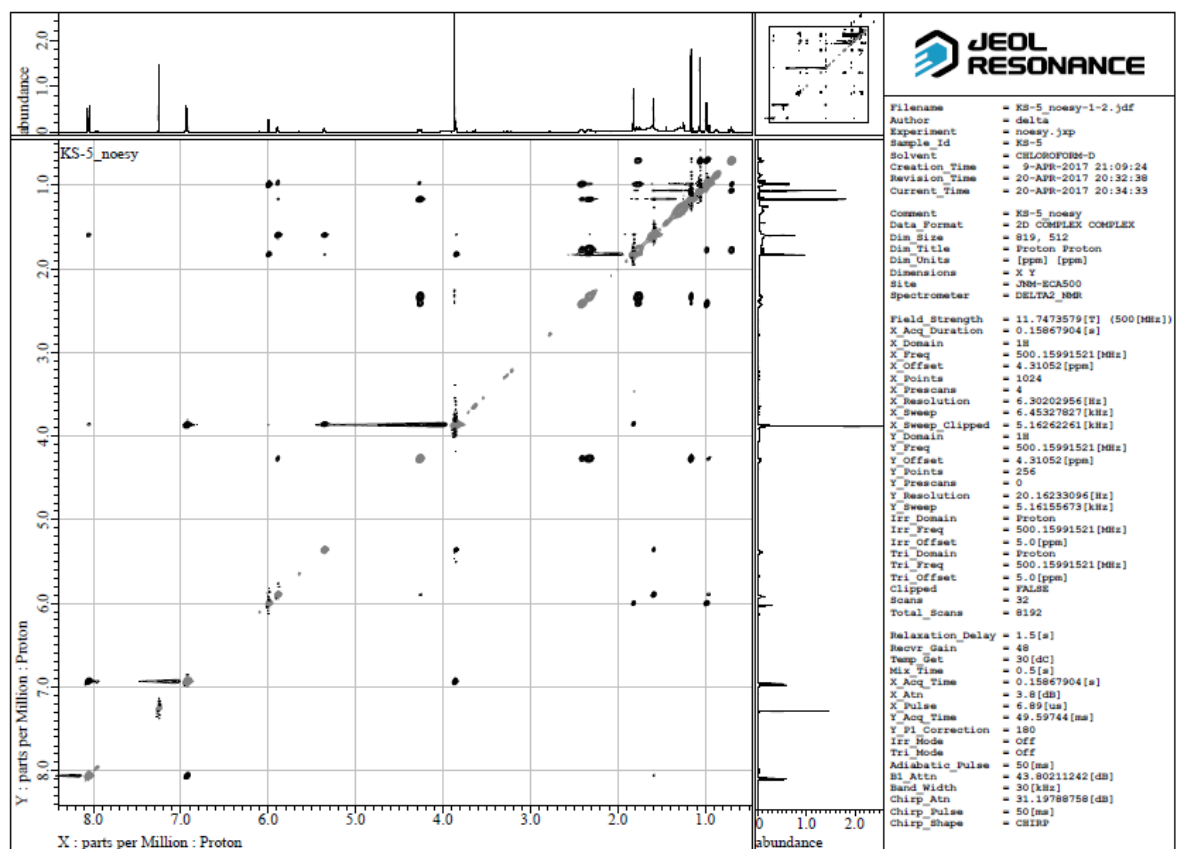

The NOESY spectrum of compound 12b

測定データ名: KS-14.01  
 作成条件: 平均(MS[1]) 経過時間: 0.66.0.82)  
 x10<sup>3</sup> 面積 (22590)

実験日時: 2017/10/13 21:52:53  
 イオン化モード: ESI+

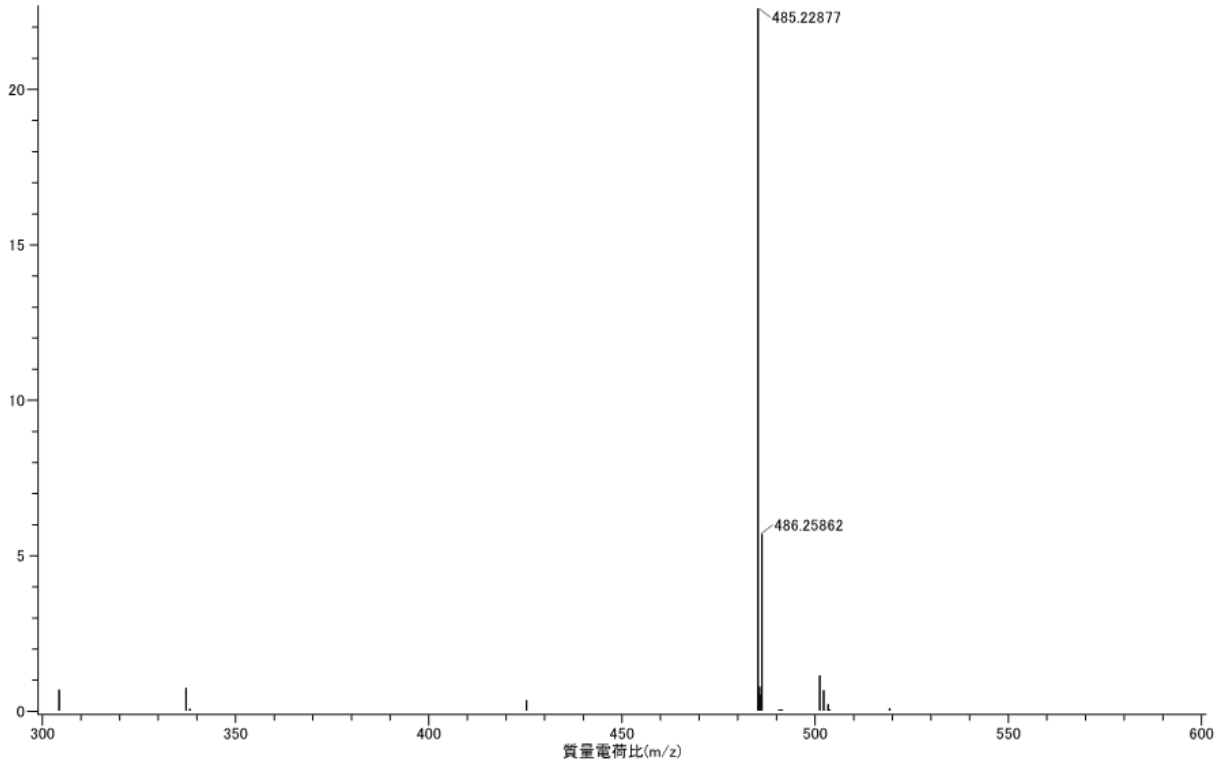

The HRESIMS spectrum of compound 13a

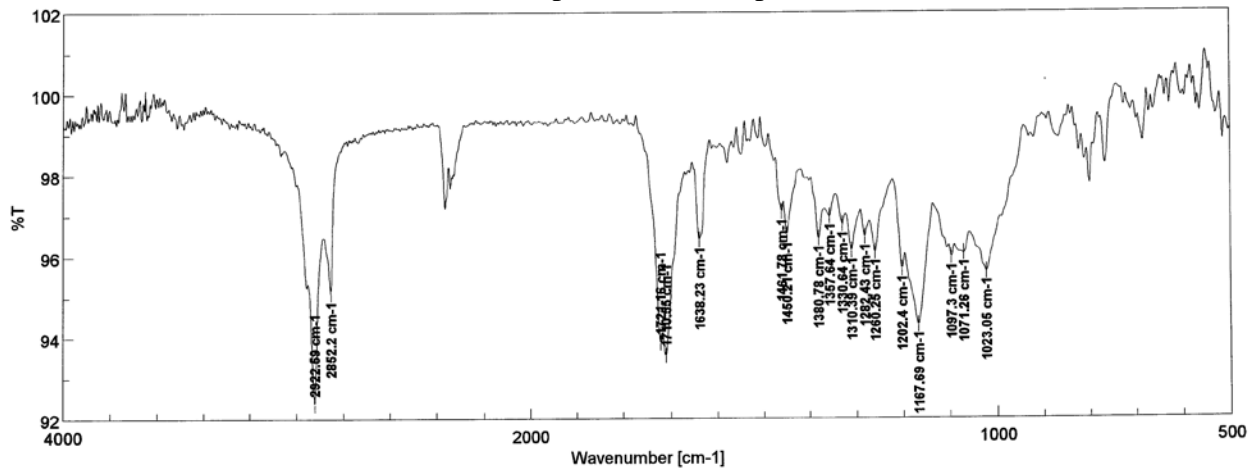

【コメント情報】  
 試料名 KS-14  
 コメント  
 測定者 B  
 所属 東邦大学 薬学部  
 会社

【データ情報】  
 作成日時 2017/07/26 15:57  
 データタイプ 等間隔データ  
 横軸 Wavenumber [cm-1]  
 縦軸 %T  
 スタート 0 cm-1  
 エンド 7800.85 cm-1  
 データ間隔 0.964233 cm-1  
 データ数 8091

【測定情報】  
 機種名 FT/IR-4100typeA  
 シリアル番号 B109261016

光源 標準光源  
 検出器 TGS  
 積算回数 Auto (223)  
 分解 4 cm-1  
 ゼロフリンギング On  
 アポダイゼーション Cosine  
 ゲイン Auto (16)  
 アパーチャ Auto (7.1 mm)  
 スキャンスピード Auto (2 mm/sec)  
 フィルタ Auto (30000 Hz)

Memory-2

The IR spectrum of compound 13a

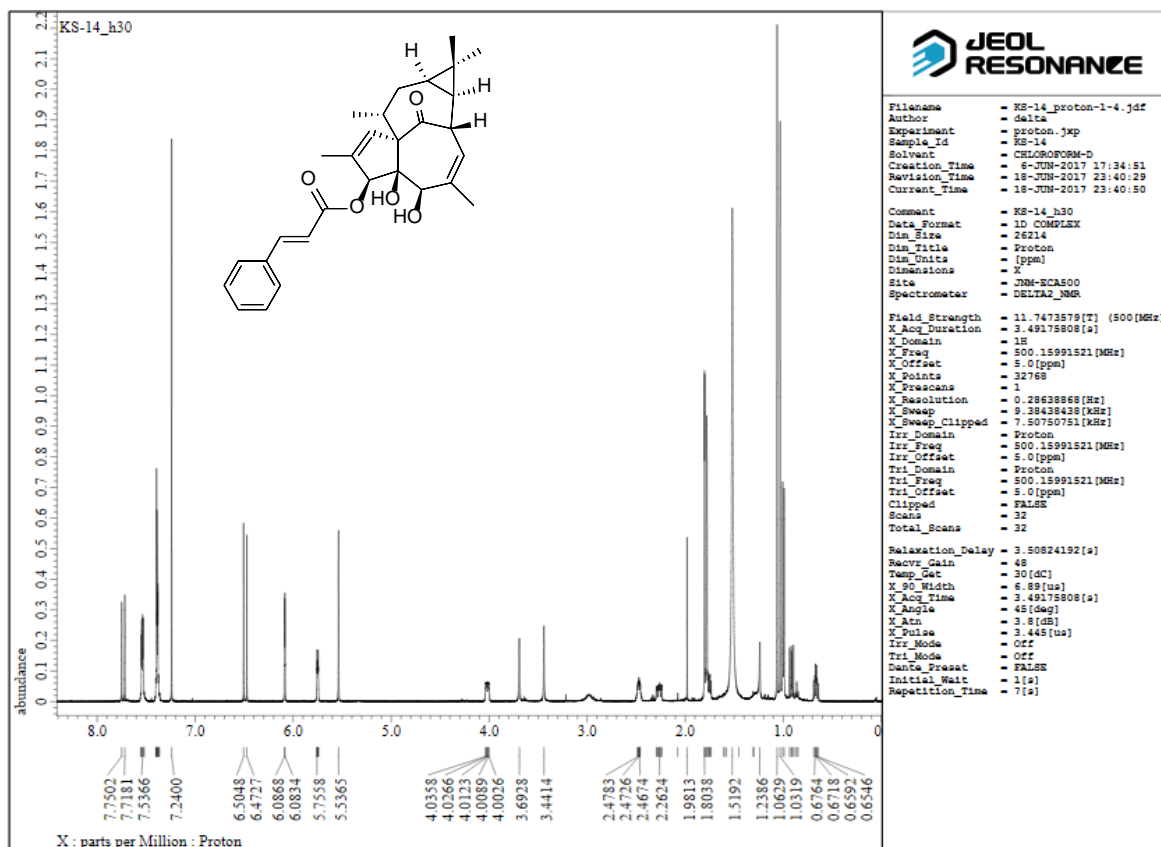

The <sup>1</sup>H spectrum of compound 13a

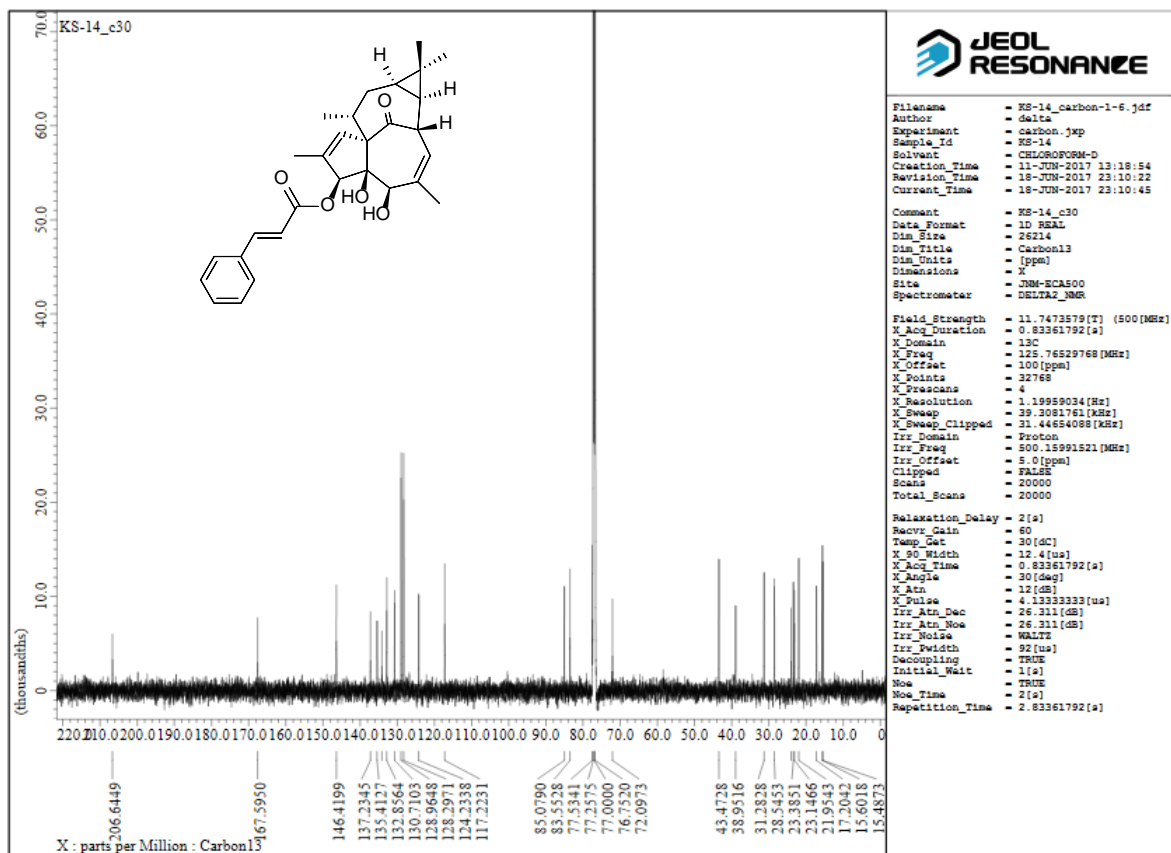

The <sup>13</sup>C spectrum of compound 13a

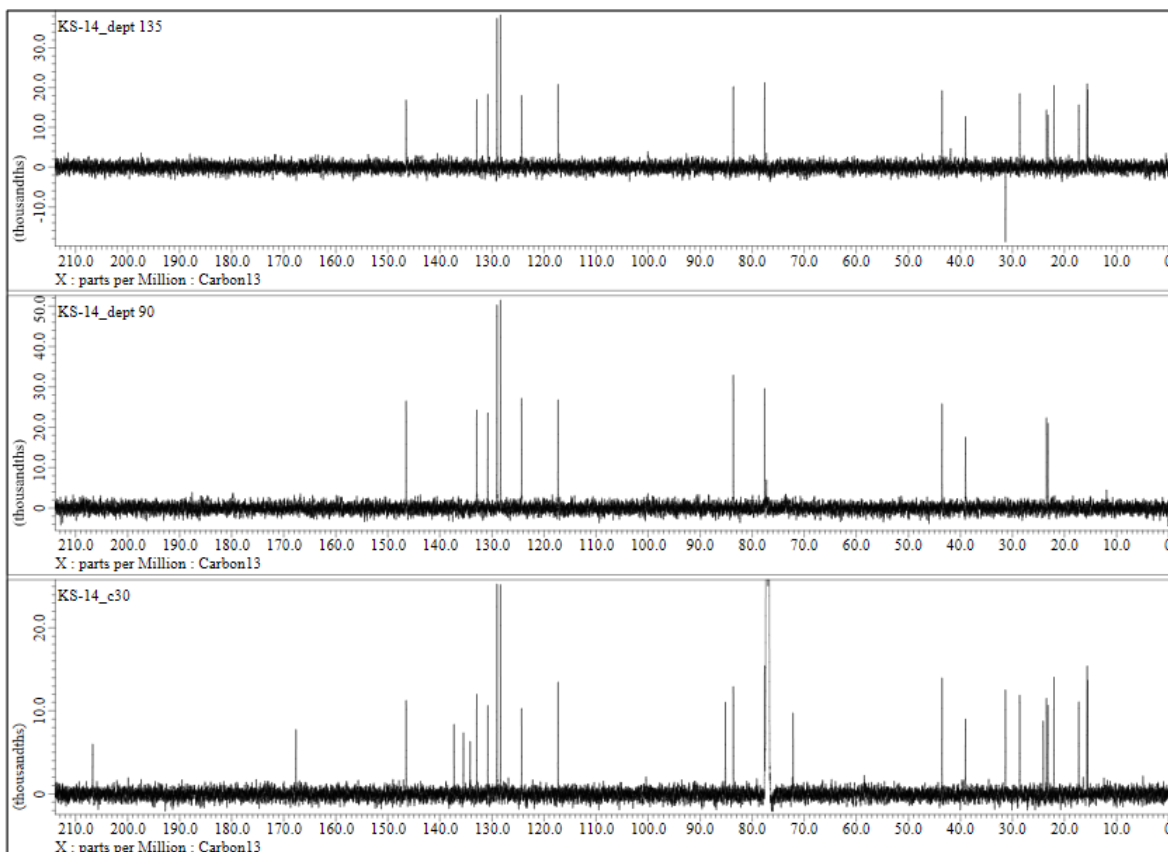

The DEPT spectrum of compound 13a

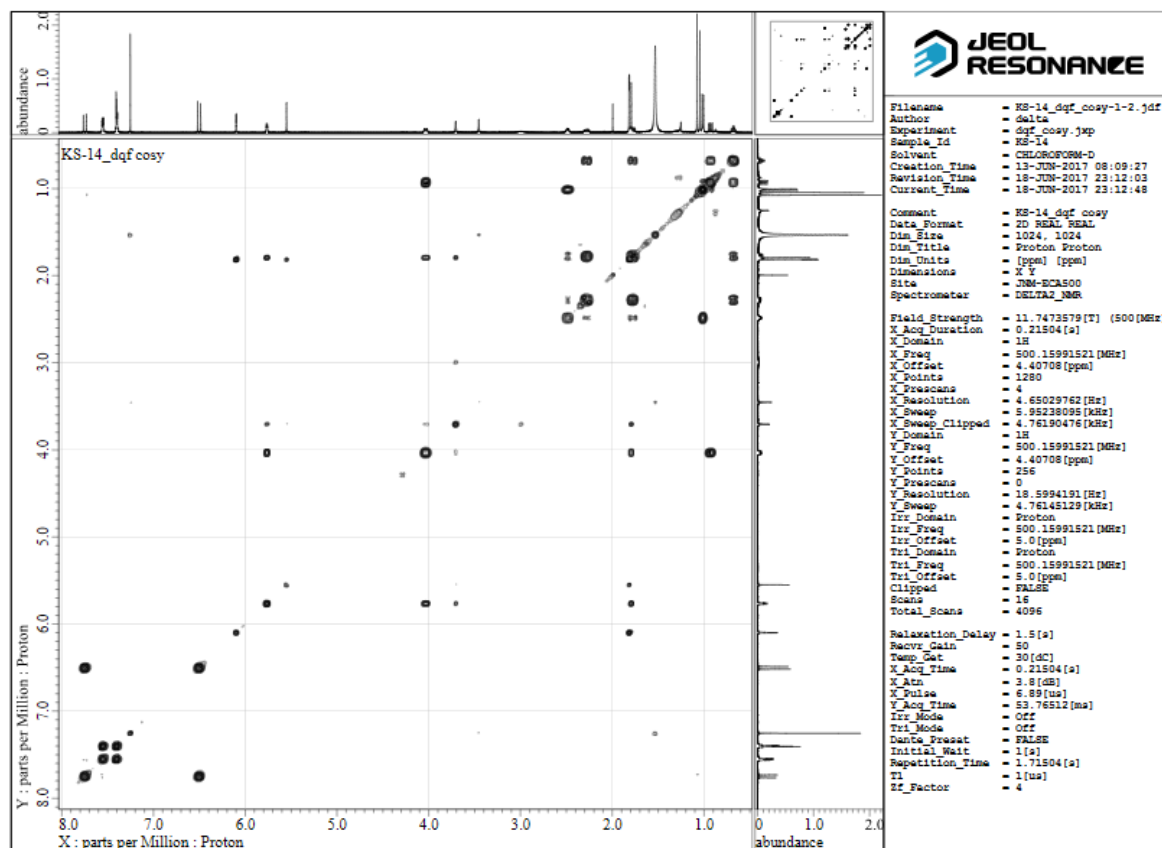

The DQF-COSY spectrum of compound 13a

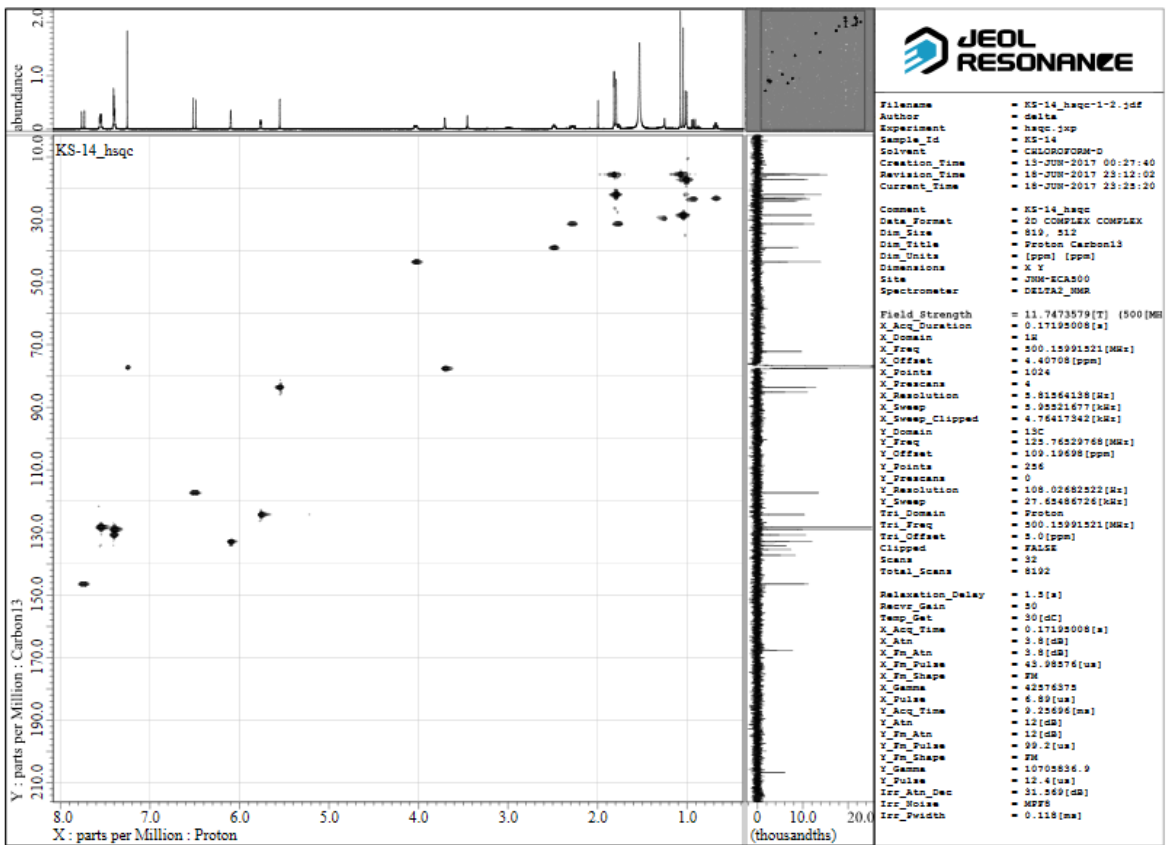

The HSQC spectrum of compound 13a

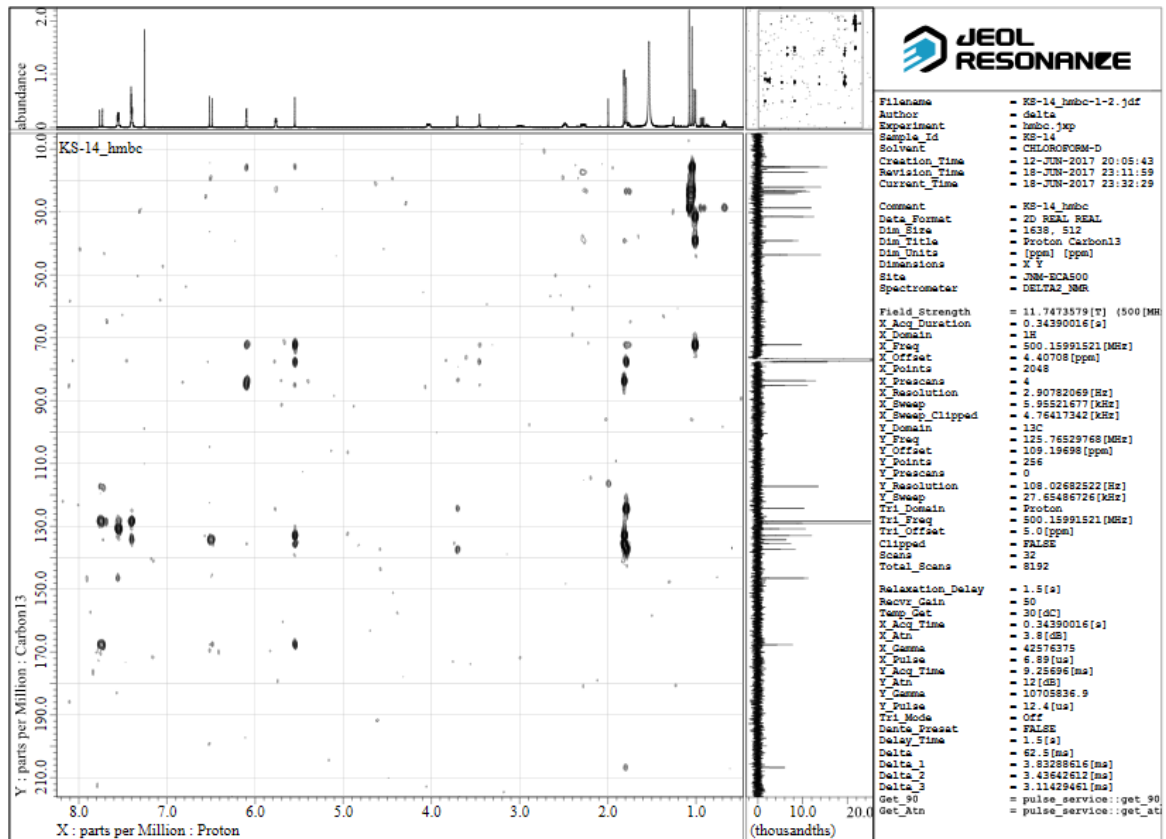

The HMBC spectrum of compound 13a

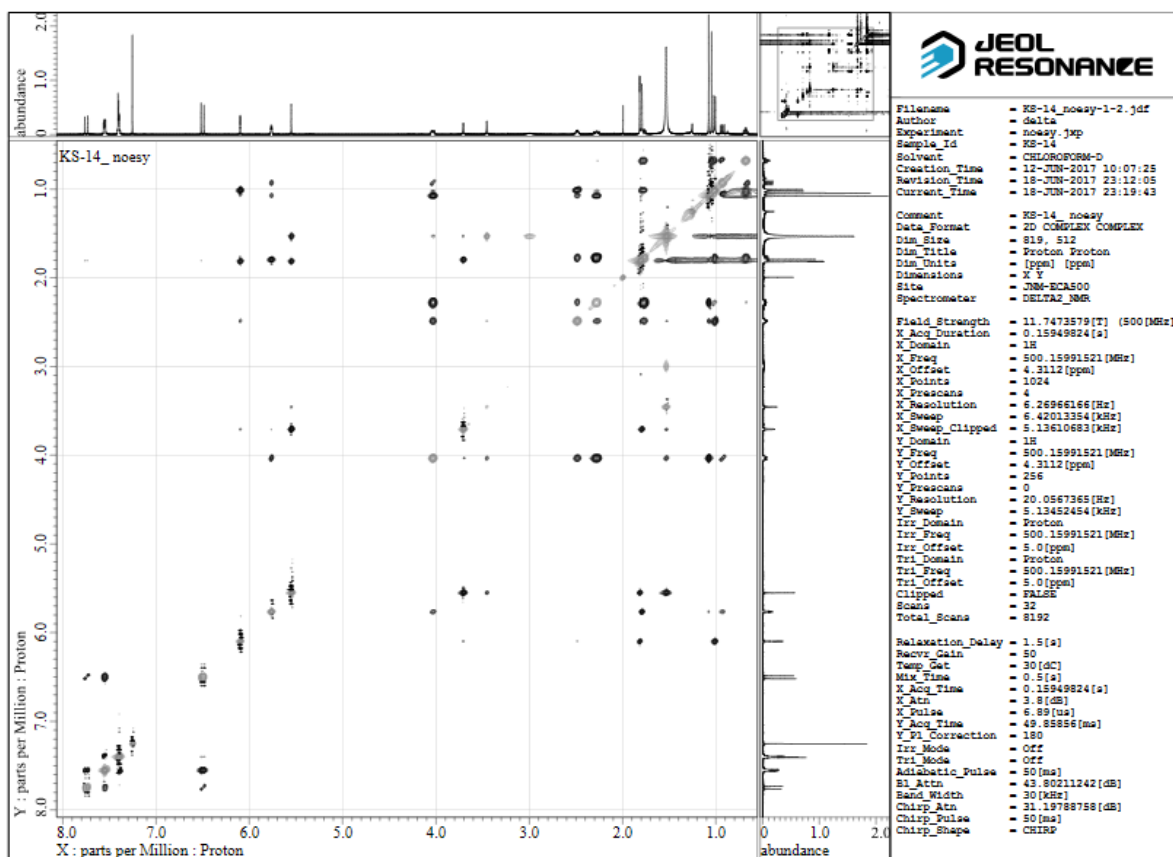

The NOESY spectrum of compound **13a**

測定データ名: KS-13.02  
作成条件: 平均(MS[1] 経過時間: 0.64.0.96)  
×10<sup>3</sup> 面積 (19136)

実験日時: 2017/10/13 21:44:25  
イオン化モード: ESI+

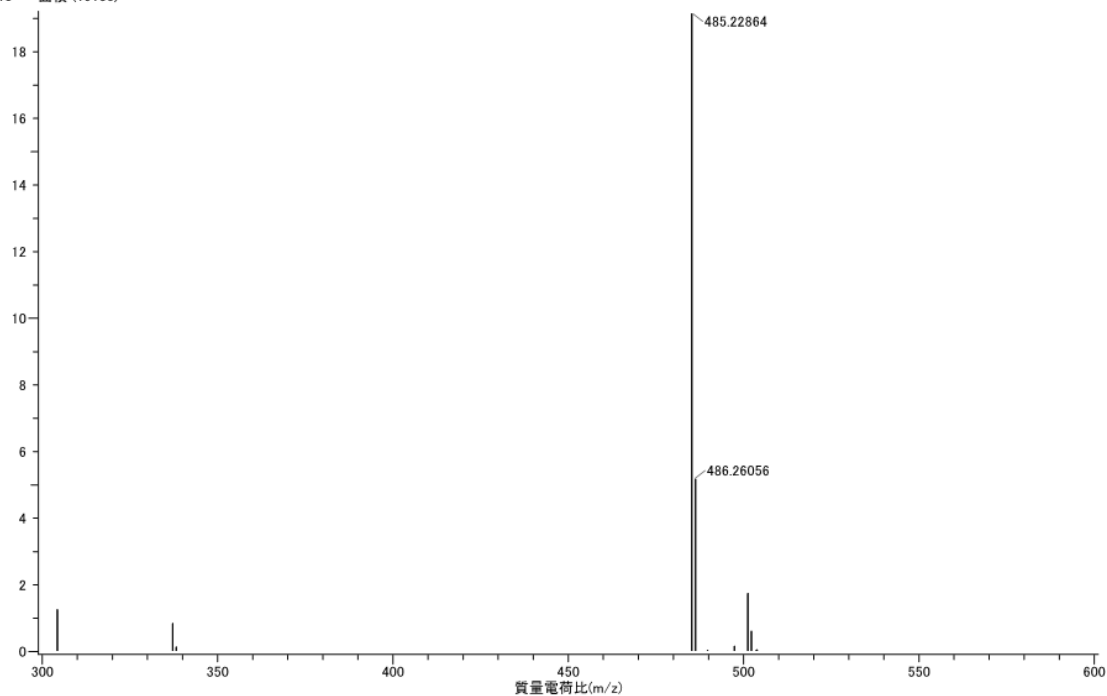

The HRESIMS spectrum of compound **13b**



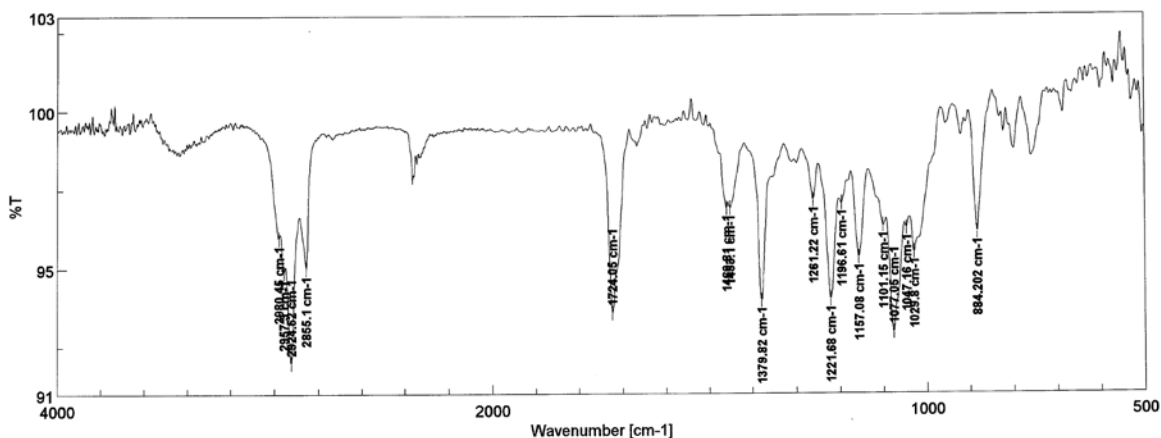

[コメント情報]  
 試料名 KS-12  
 コメント  
 測定者 B  
 所属会社 東邦大学 薬学部  
 [データ情報]  
 作成日時 2017/07/26 15:14  
 データタイプ 等間隔データ  
 横軸 Wavenumber [cm-1]  
 縦軸 %T  
 スタート 0 cm-1  
 エンド 7800.65 cm-1  
 データ間隔 0.964233 cm-1  
 データ数 8091

[測定情報]  
 機種名 FT/IR-4100typeA  
 シリアル番号 B109261016  
 光源 標準光源  
 検出器 TGS  
 積算回数 Auto (190)  
 分解 4 cm-1  
 ゼロフリンギング On  
 アポダイゼーション Cosine  
 ゲイン Auto (16)  
 アパーチャー Auto (7.1 mm)  
 スキャンスピード Auto (2 mm/sec)  
 フィルタ Auto (30000 Hz)

Memory-2

The HRESIMS spectrum of compound 13b

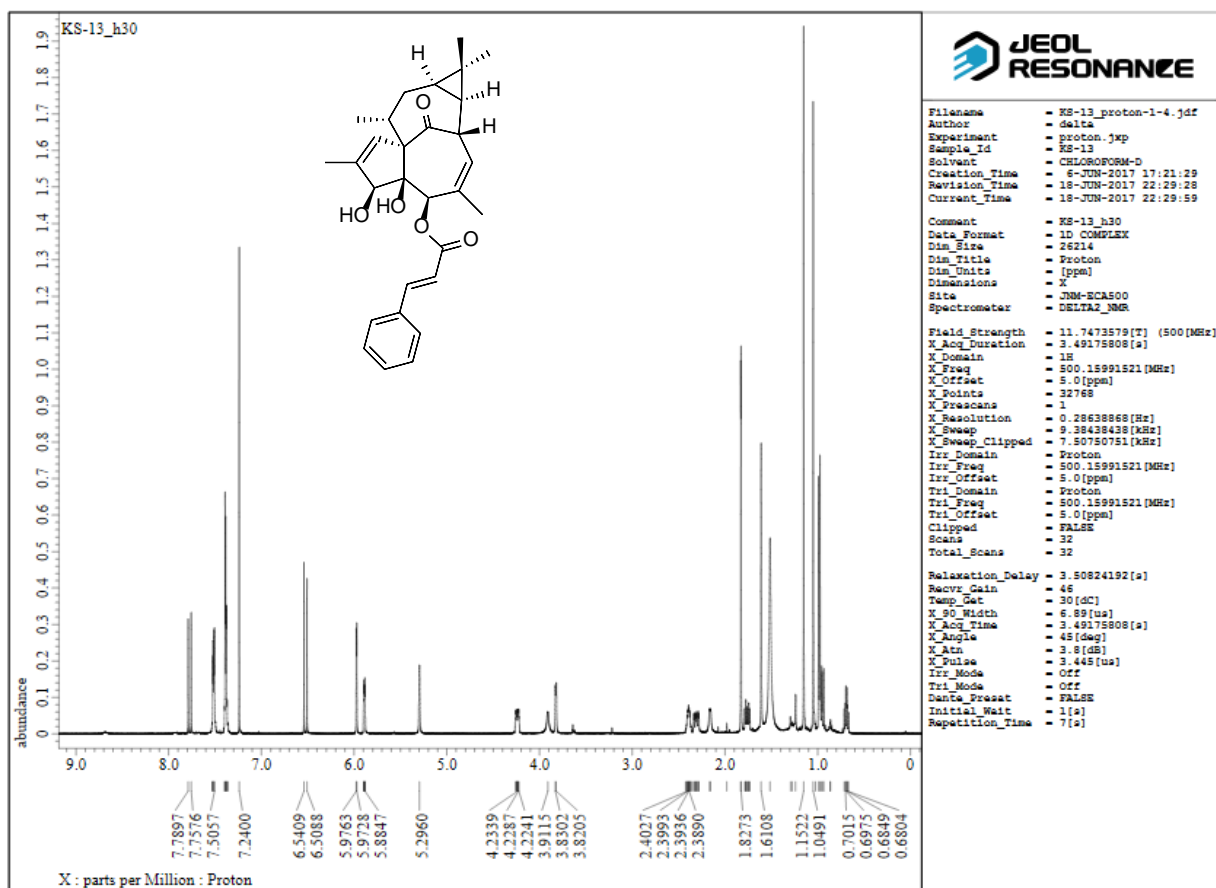

The <sup>1</sup>H spectrum of compound 13b



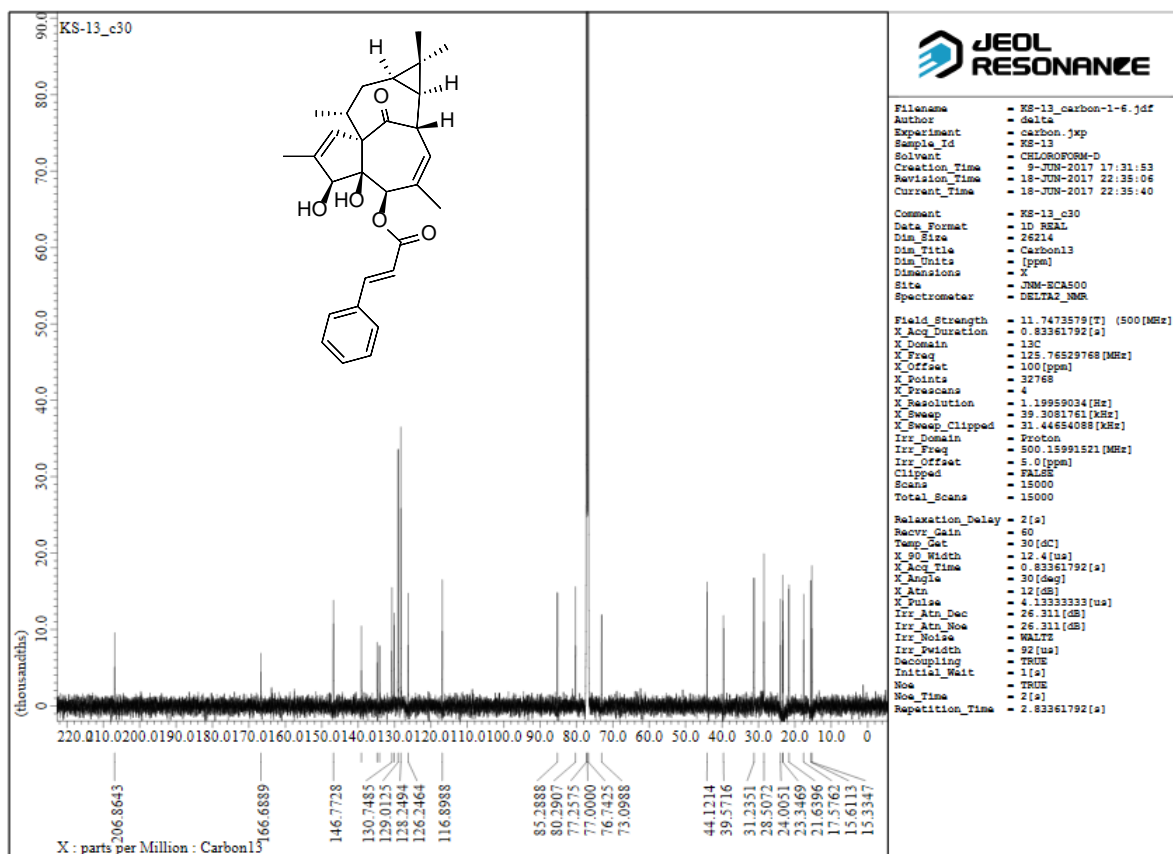

The  $^{13}\text{C}$  spectrum of compound 13b

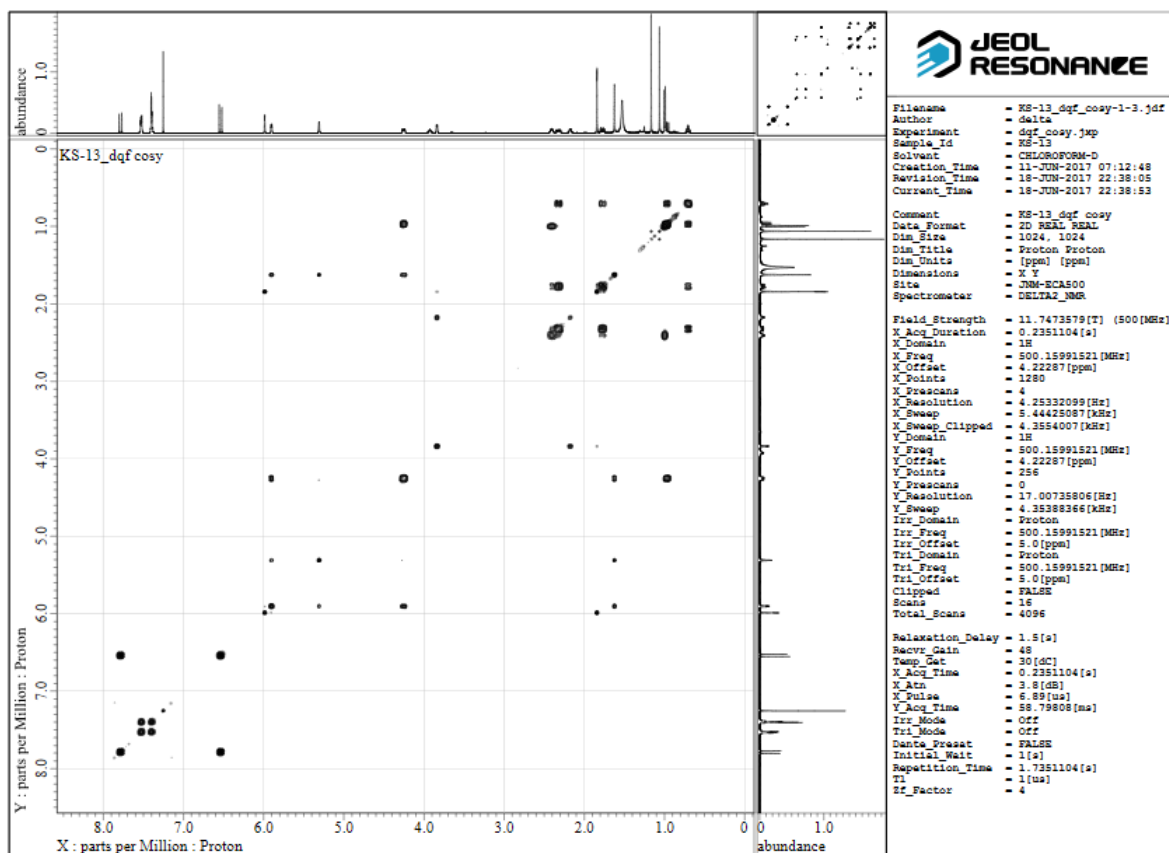

The DQF-COSY spectrum of compound 13b

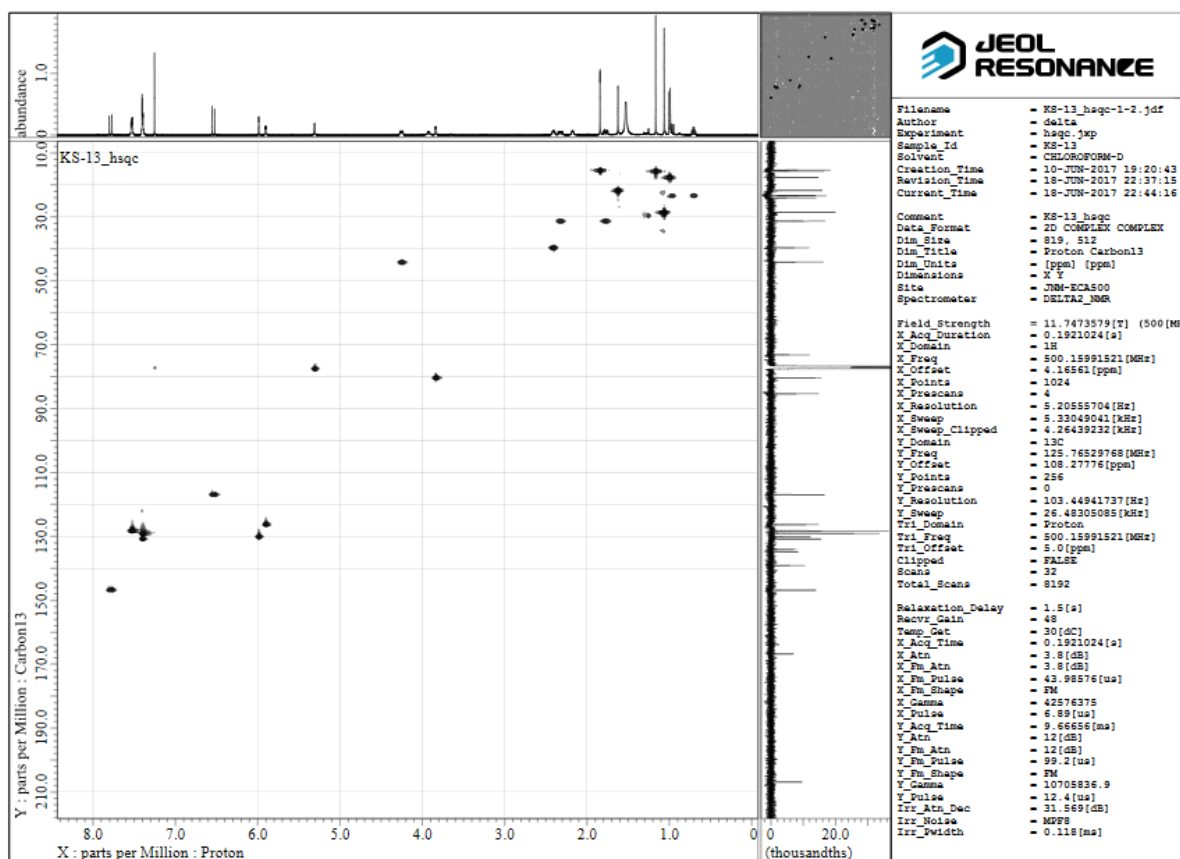

The HSQC spectrum of compound **13b**

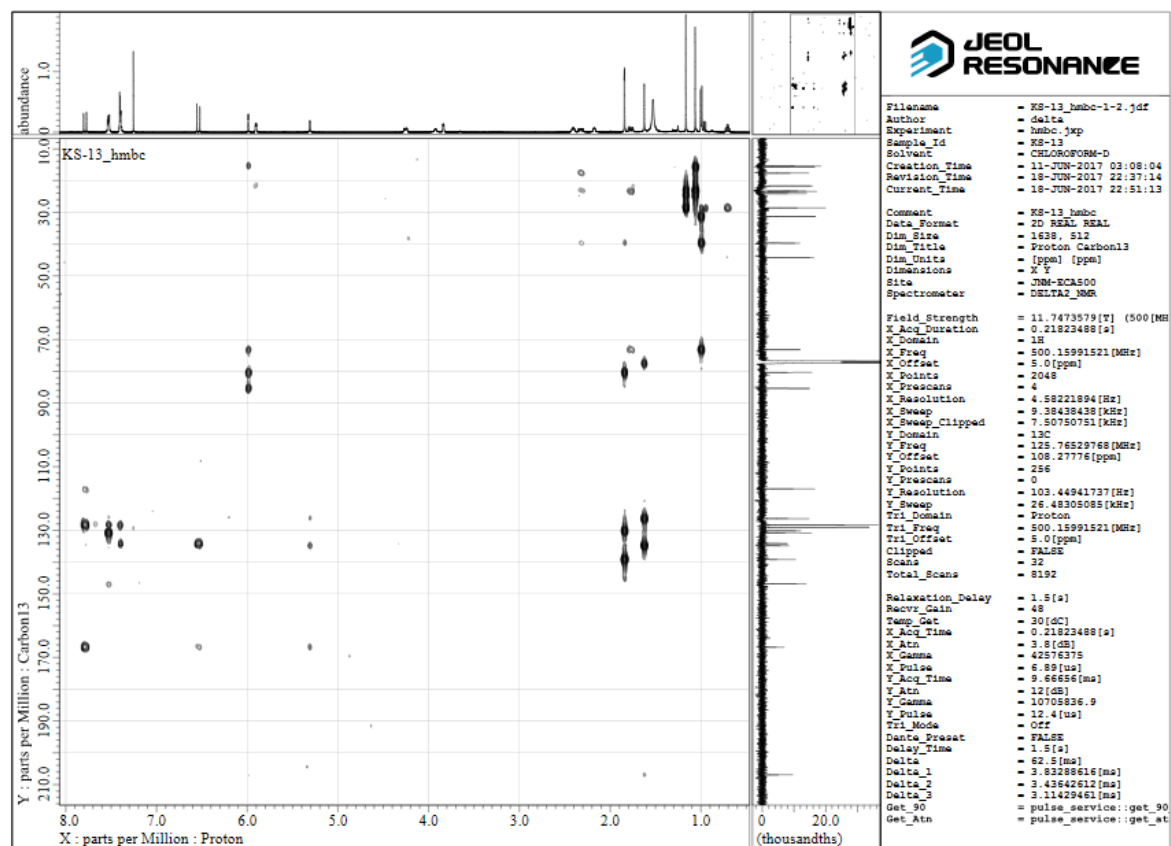

The HMBC spectrum of compound **13b**

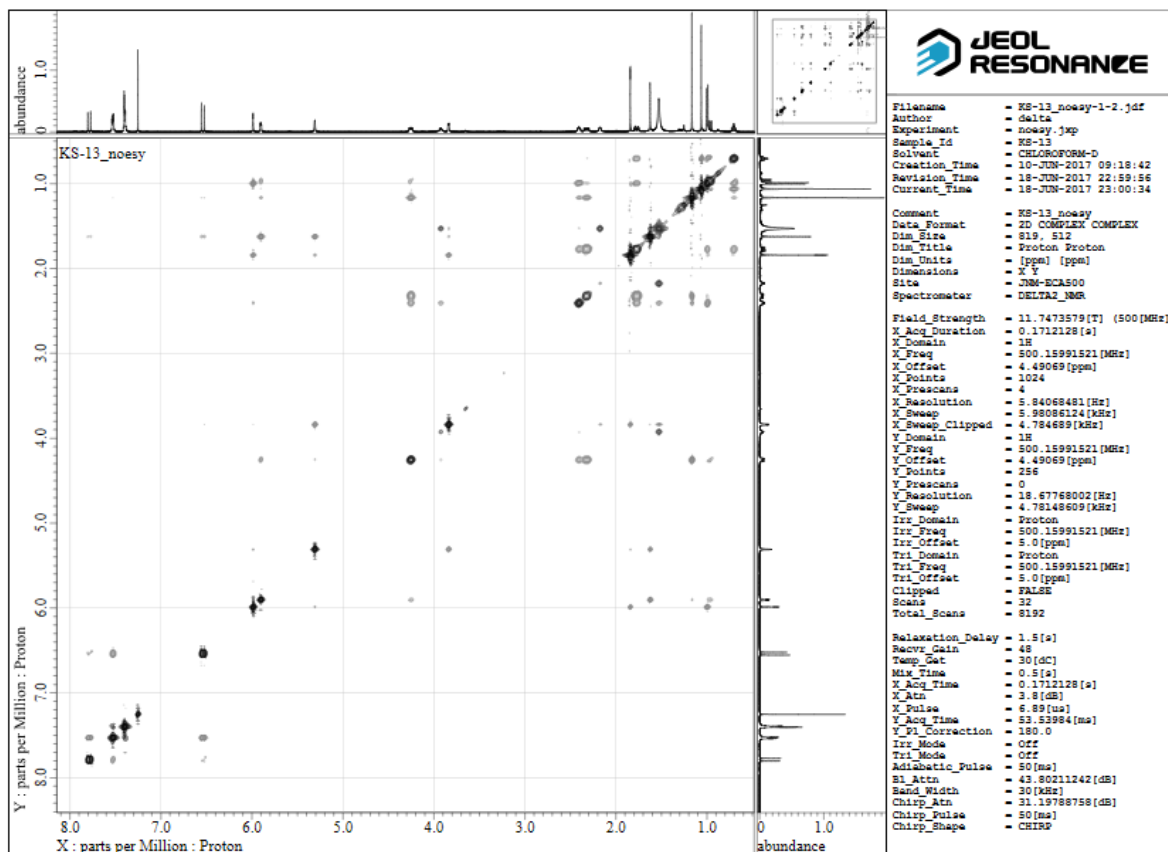

The NOESY spectrum of compound **13b**

測定データ名: KS-16.01  
作成条件: 平均(MS[1]) 経過時間: 0.43.0.52  
x10<sup>3</sup> 面積 (14808)

実験日時: 2017/10/13 22:06:09  
イオン化モード: ESI+

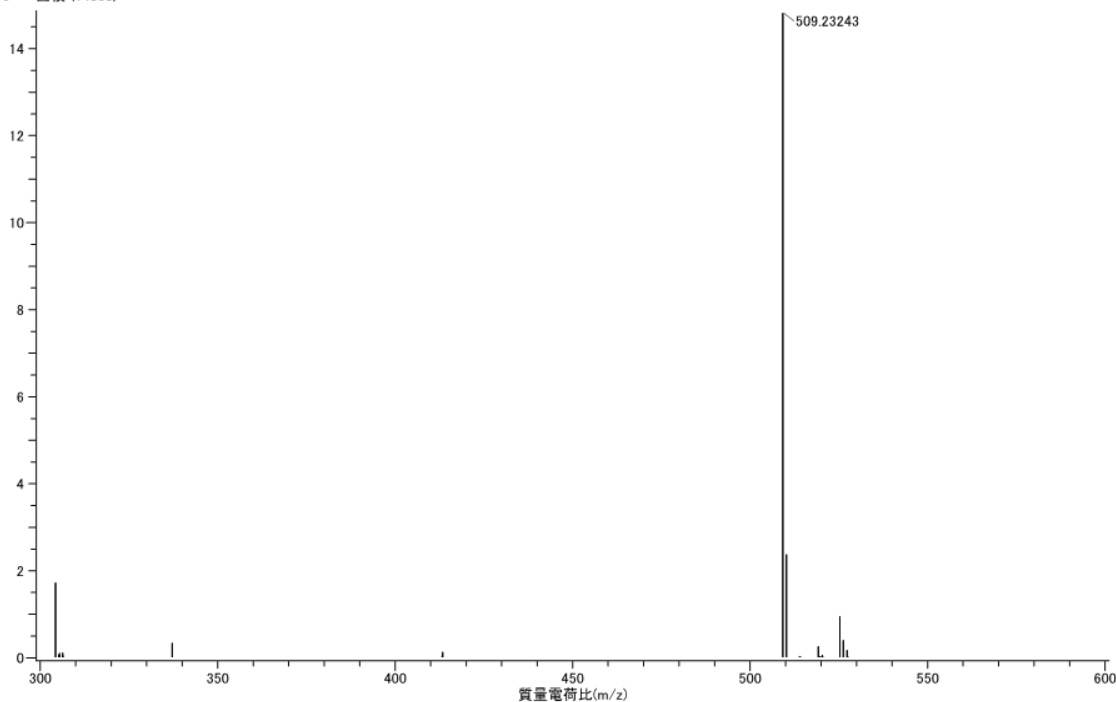

The HRESIMS spectrum of compound **14a**

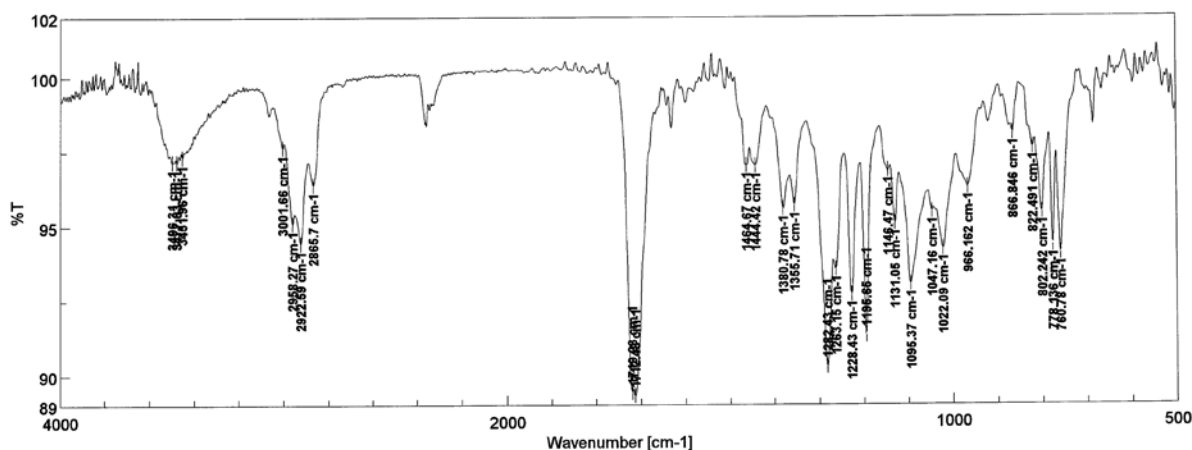

|                 |                   |               |                     |          |
|-----------------|-------------------|---------------|---------------------|----------|
| <b>[コメント情報]</b> | KS-16             | <b>[測定情報]</b> | 機種名 FT/IR-4100typeA | Memory-2 |
| 試料名             |                   | シリアル番号        | B109261016          |          |
| 測定者             | B                 | 光源            | 標準光源                |          |
| 所属会社            | 東邦大学 薬学部          | 検出器           | TGS                 |          |
|                 |                   | 積算回数          | Auto (221)          |          |
| <b>[データ情報]</b>  |                   | 分解            | 4 cm-1              |          |
| 作成日時            | 2017/07/26 16:23  | ゼロフリンギング      | On                  |          |
| データタイプ          | 等間隔データ            | アポダイゼーション     | Cosine              |          |
| 横軸              | Wavenumber [cm-1] | ゲイン           | Auto (16)           |          |
| 縦軸              | %T                | アパーチャー        | Auto (7.1 mm)       |          |
| スタート            | 0 cm-1            | スキャンスピード      | Auto (2 mm/sec)     |          |
| エンド             | 7800.65 cm-1      | フィルタ          | Auto (30000 Hz)     |          |
| データ間隔           | 0.964233 cm-1     |               |                     |          |
| データ数            | 8091              |               |                     |          |

The IR spectrum of compound 14a

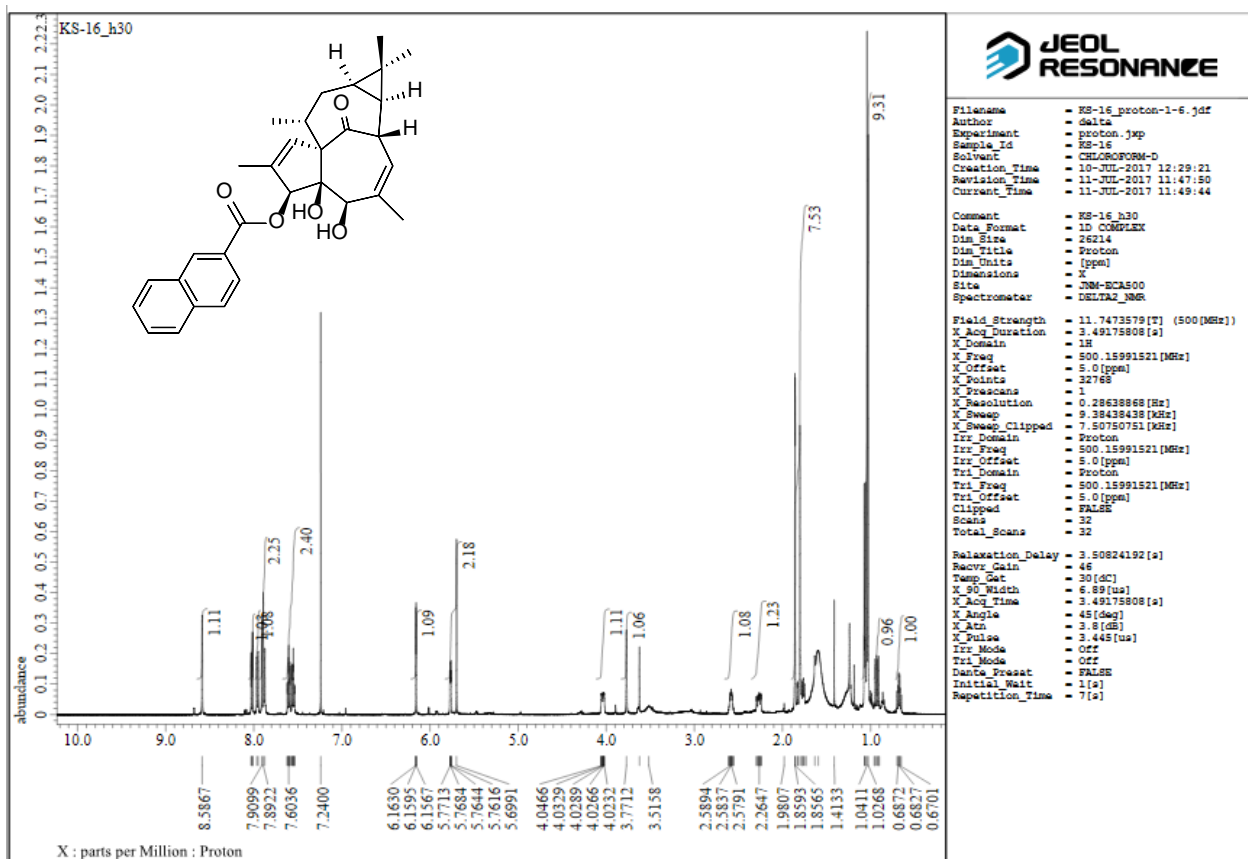

The <sup>1</sup>H spectrum of compound 14a

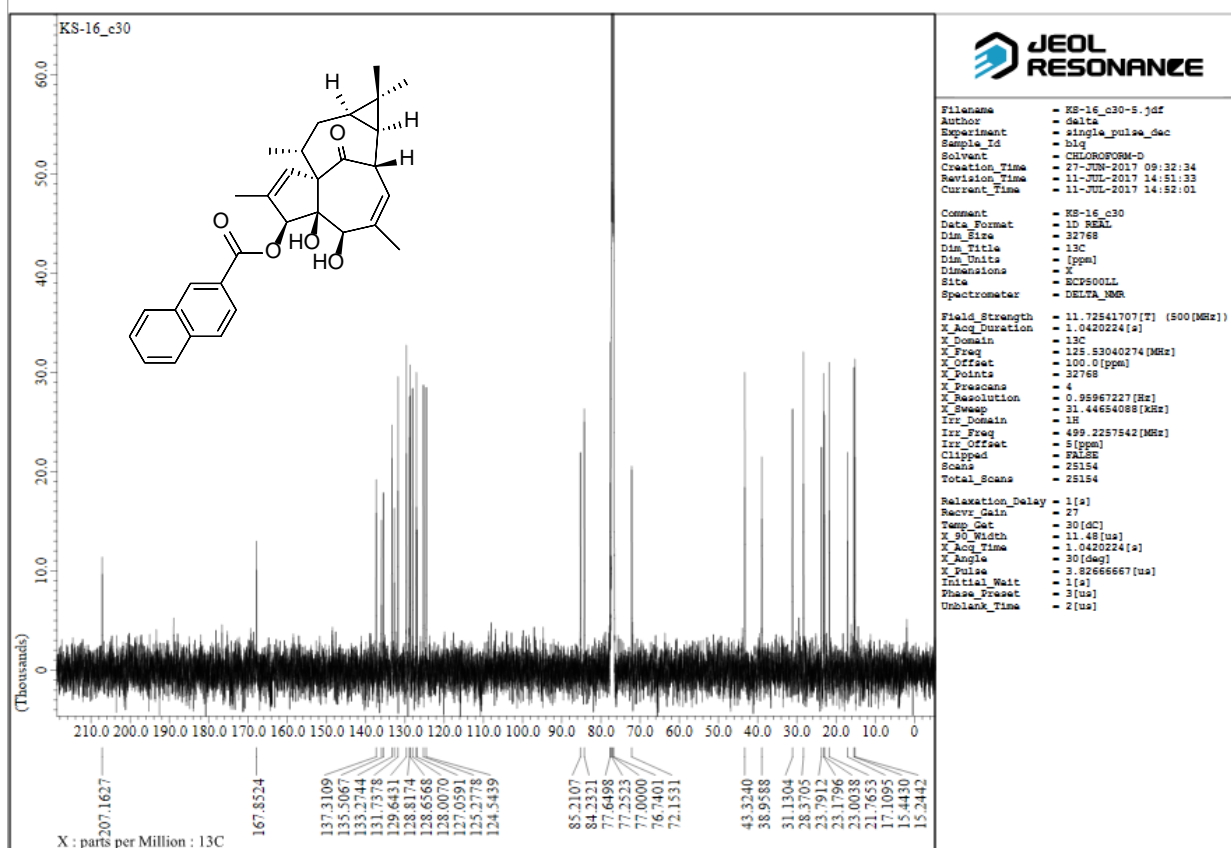

The  $^{13}\text{C}$  spectrum of compound 14a

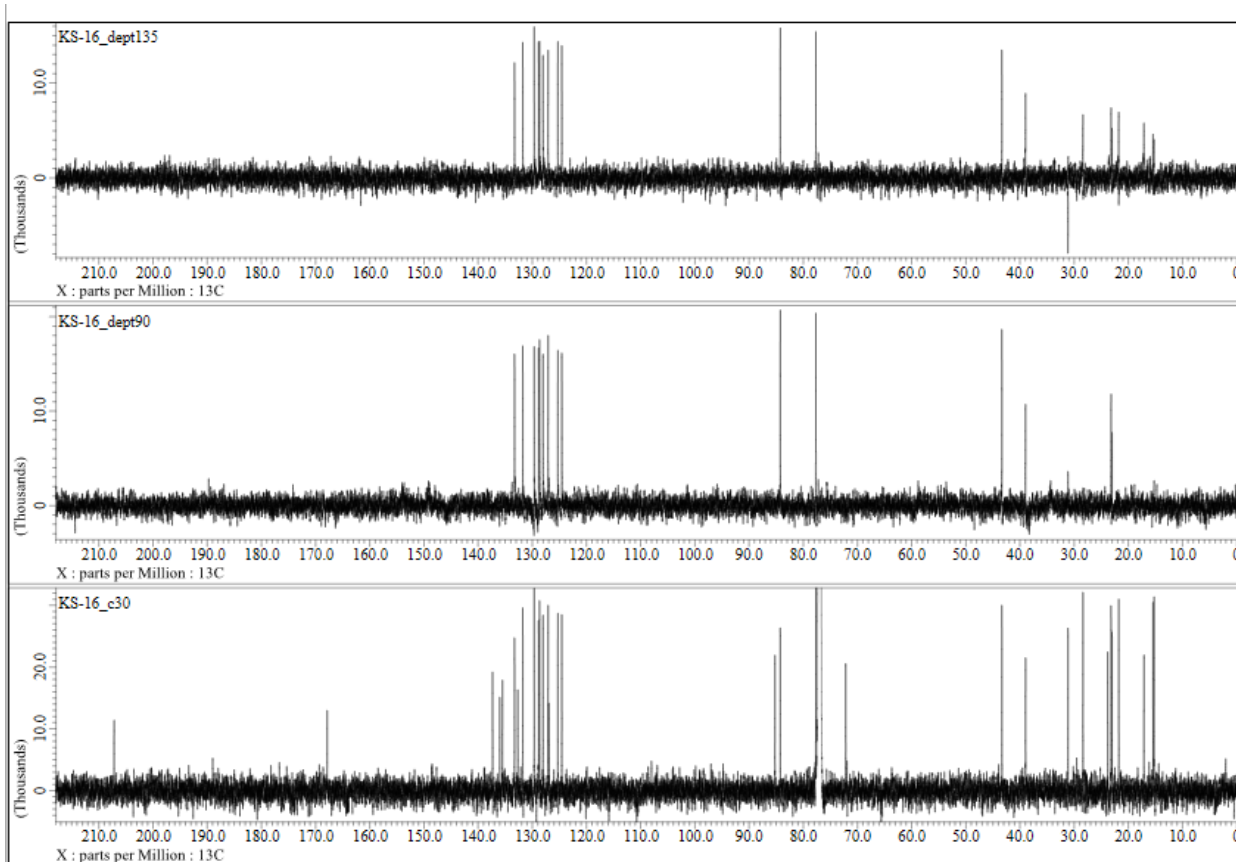

The DEPT spectrum of compound 14a

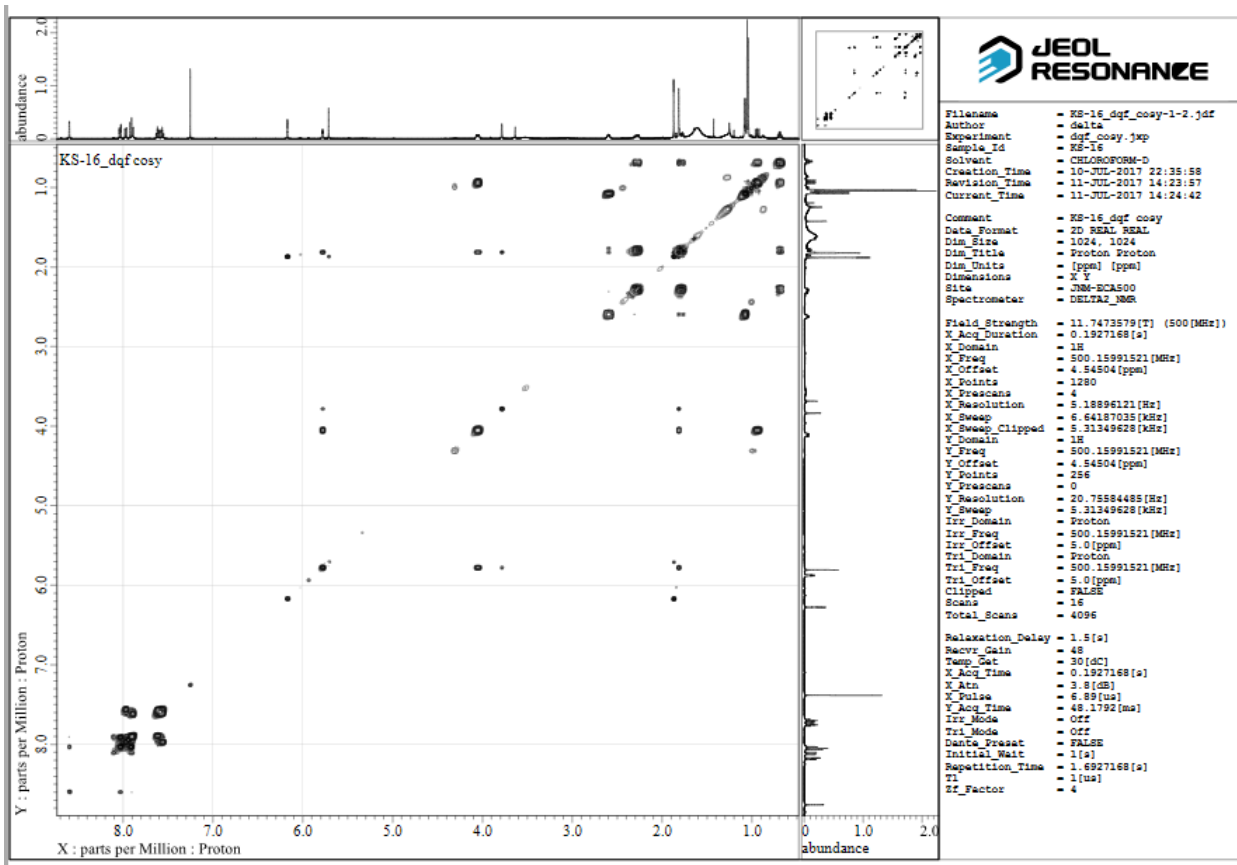

The DQF\_COSY spectrum of compound 14a

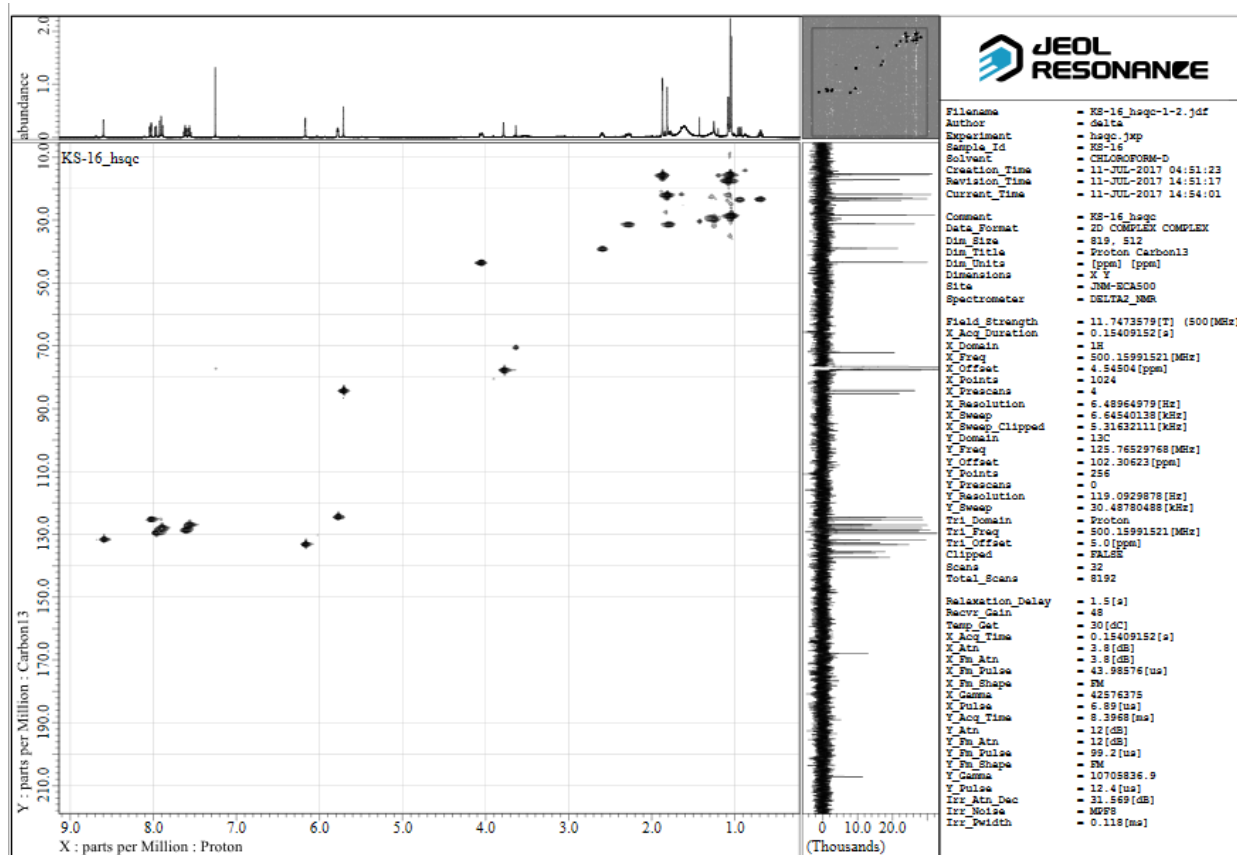

The HSQC spectrum of compound 14a



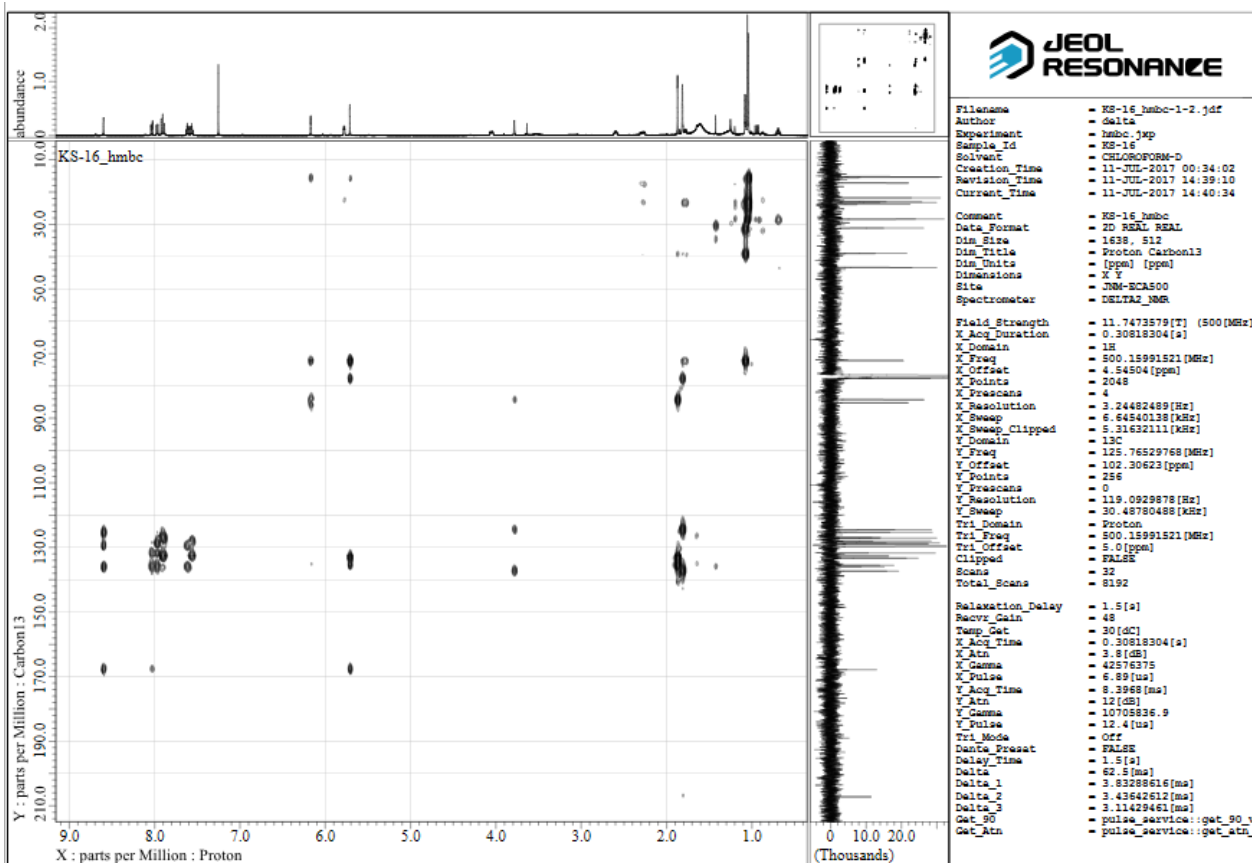

The HMBC spectrum of compound **14a**

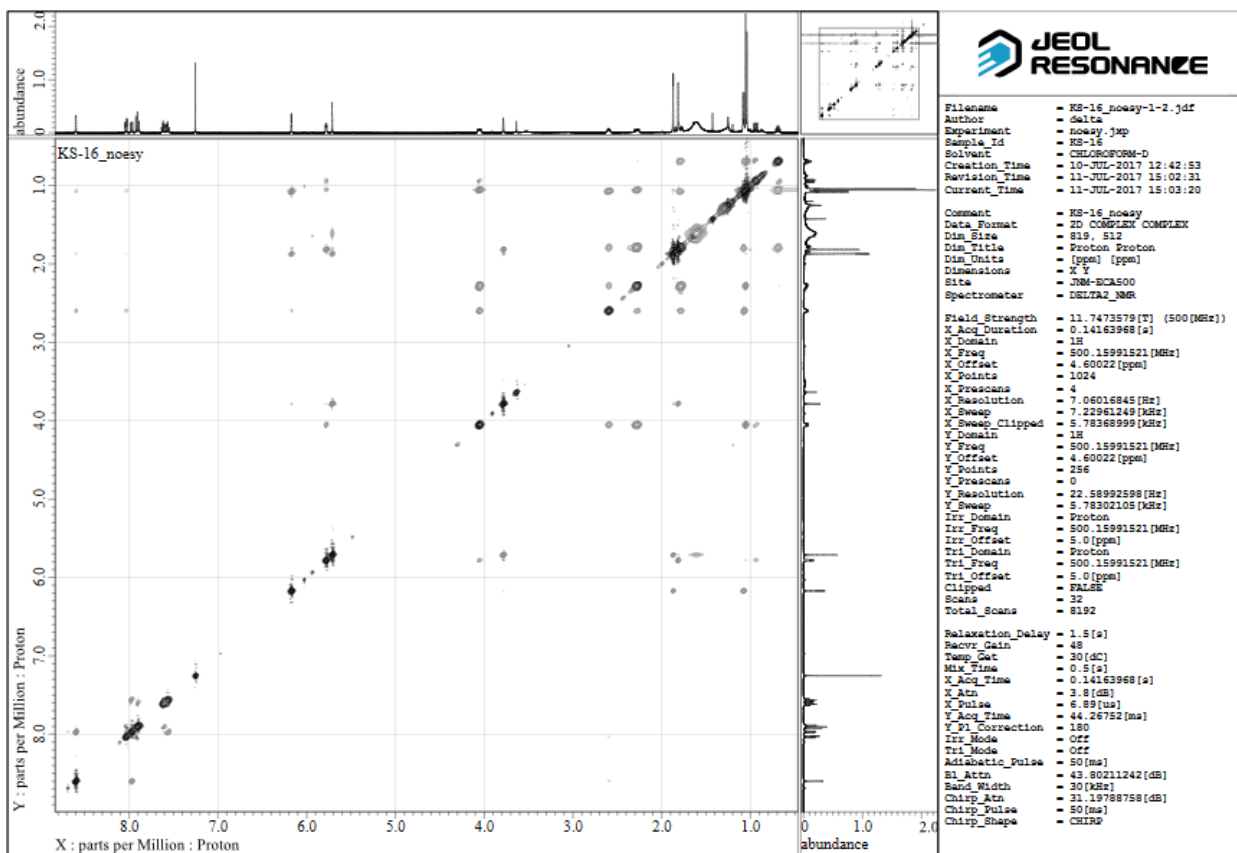

The NOESY spectrum of compound **14a**

測定データ名: KS-15\_01  
 作成条件: 平均(MS1) 経過時間: 1.00.1.13

実験日時: 2017/10/13 21:59:57  
 イオン化モード: ESI+

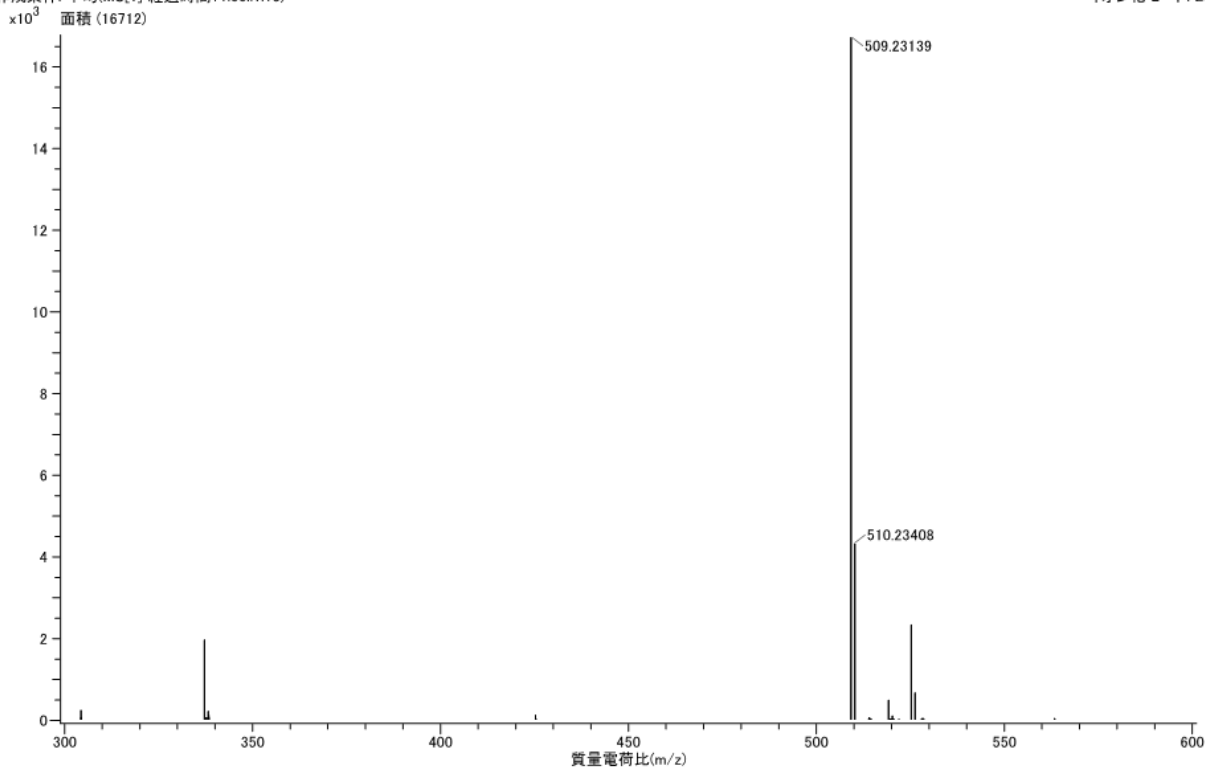

The HRESIMS spectrum of compound **14b**

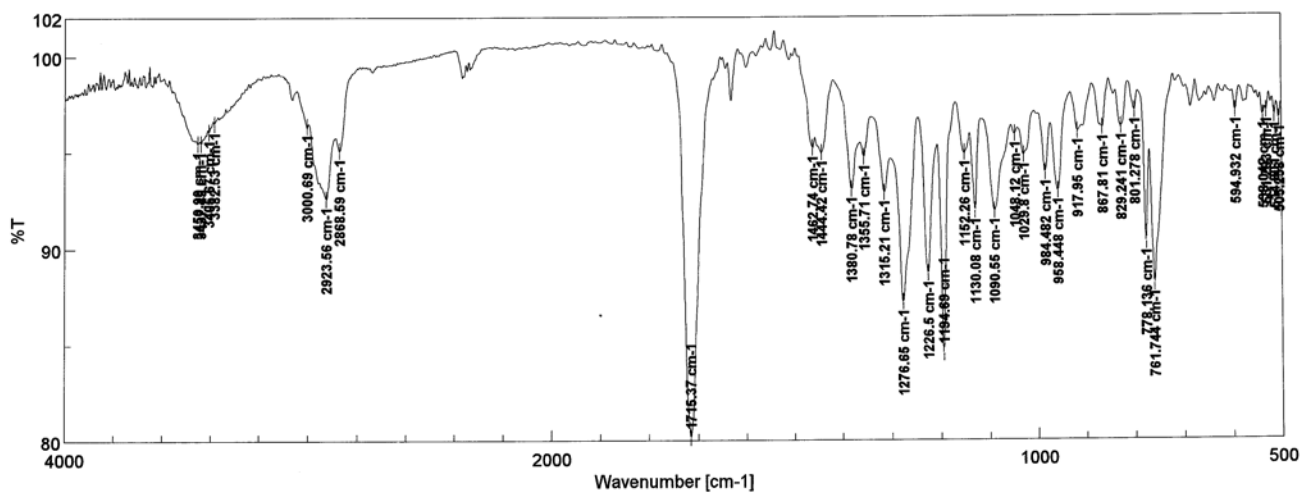

[コメント情報]

試料名 KS-15  
 コメント  
 測定者 B  
 所属 東邦大学 薬学部  
 会社

[測定情報]

機種名 FT/IR-4100typeA  
 シリアル番号 B109261016

光源 標準光源  
 検出器 TGS  
 積算回数 Auto (221)  
 分解 4 cm-1  
 ゼロフィリング On  
 アポダイゼーション Cosine  
 ゲイン Auto (16)  
 アパーチャ Auto (7.1 mm)  
 スキャンスピード Auto (2 mm/sec)  
 フィルタ Auto (30000 Hz)

Memory-2

[データ情報]

作成日時 2017/07/26 16:12  
 データタイプ 等間隔データ  
 縦軸 Wavenumber [cm-1]  
 横軸 %T  
 スタート 0 cm-1  
 エンド 7800.65 cm-1  
 データ間隔 0.964233 cm-1  
 データ数 8091

The IR spectrum of compound **14b**



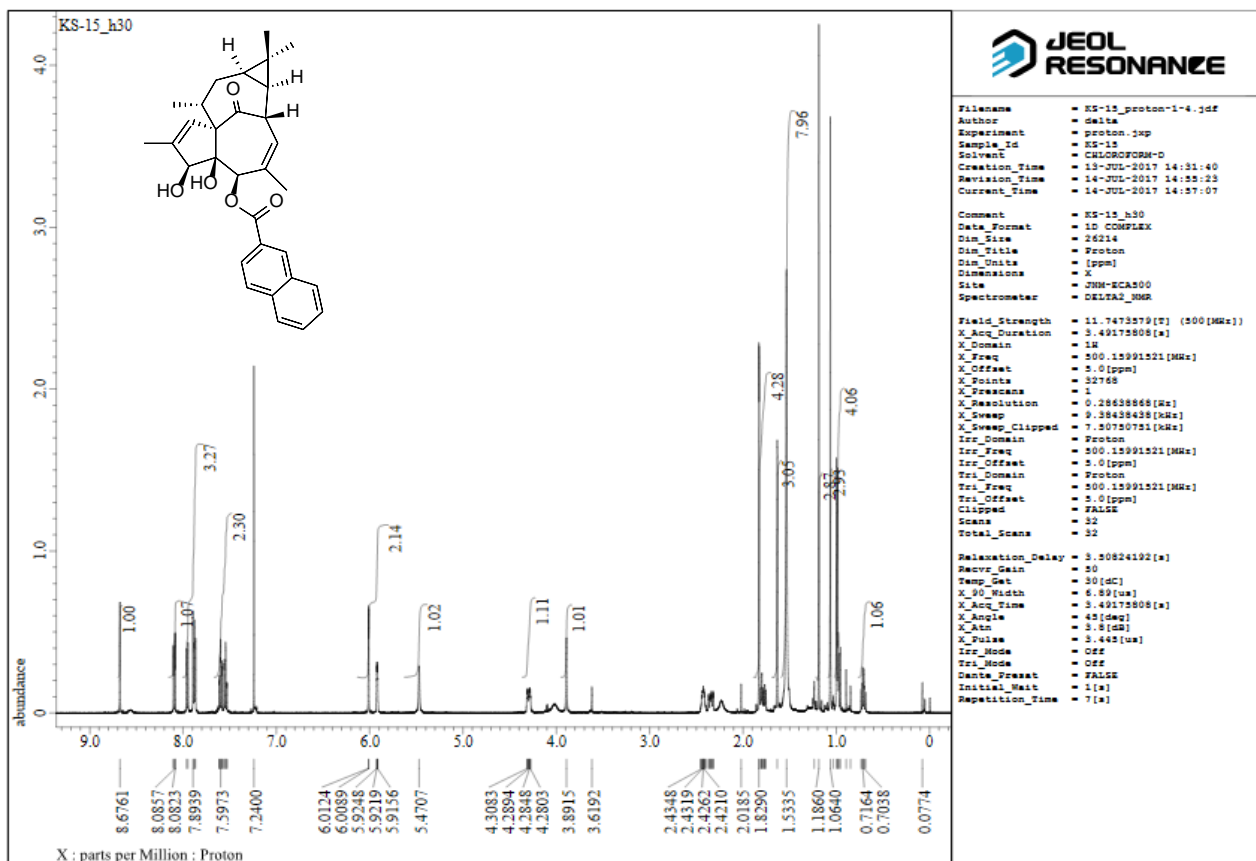

The  $^1\text{H}$  spectrum of compound **14b**

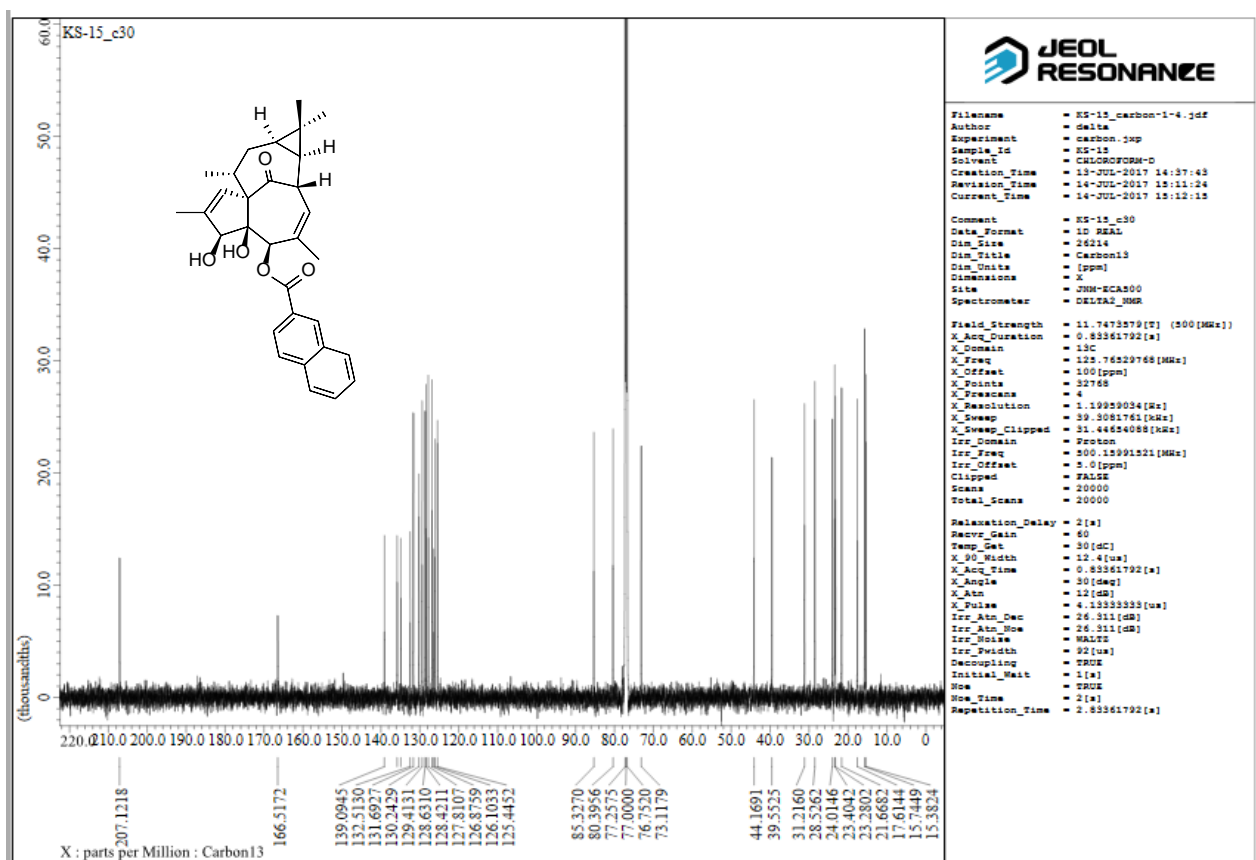

The  $^{13}\text{C}$  spectrum of compound **14b**

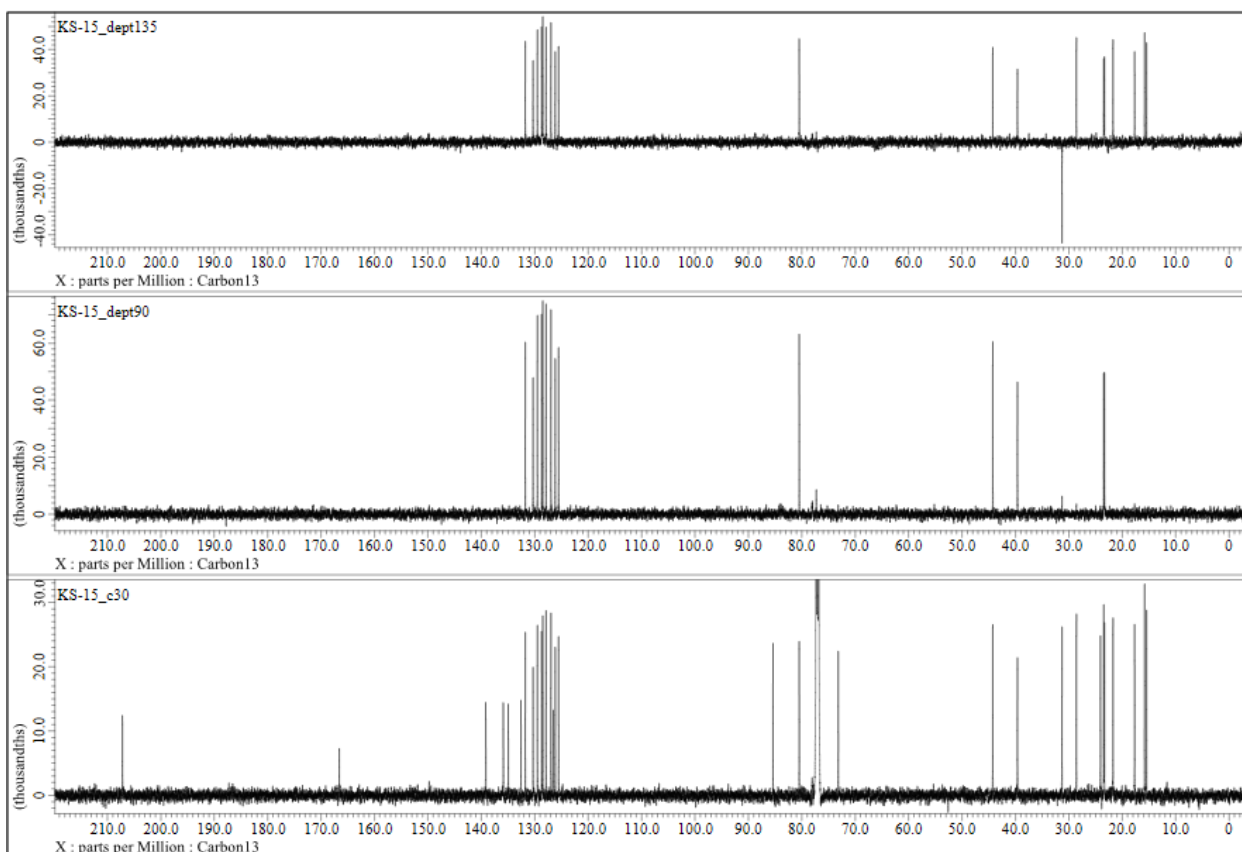

The DEPT spectrum of compound **14b**

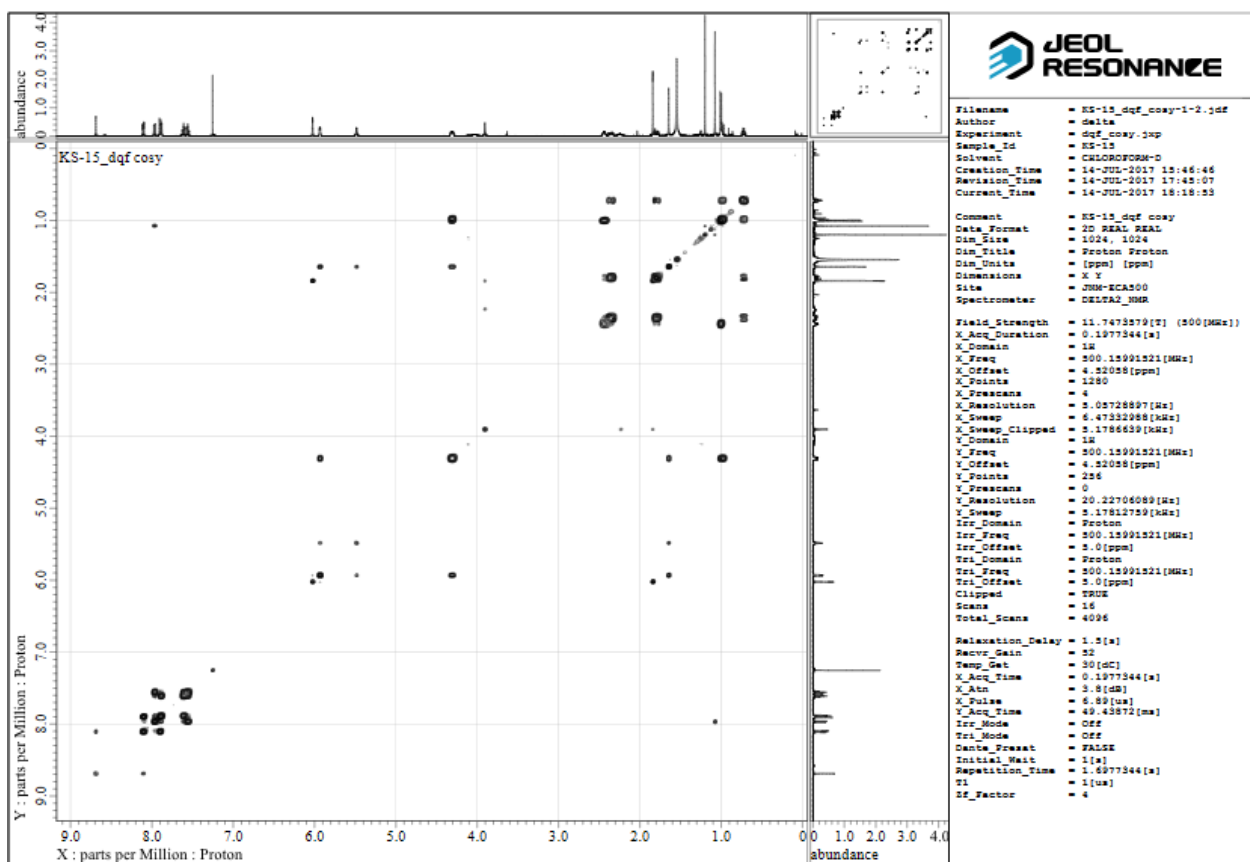

The DQF-COSY spectrum of compound **14b**

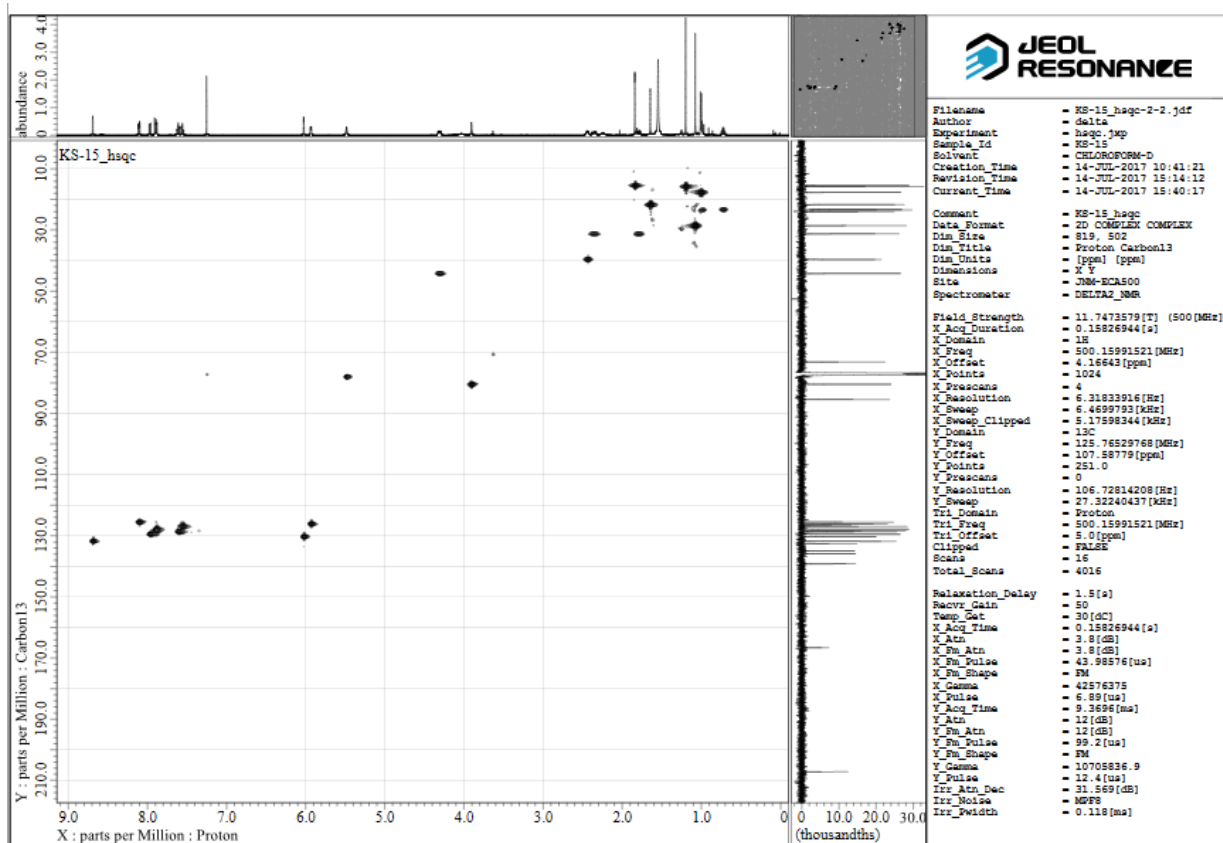

The HSQC spectrum of compound **14b**

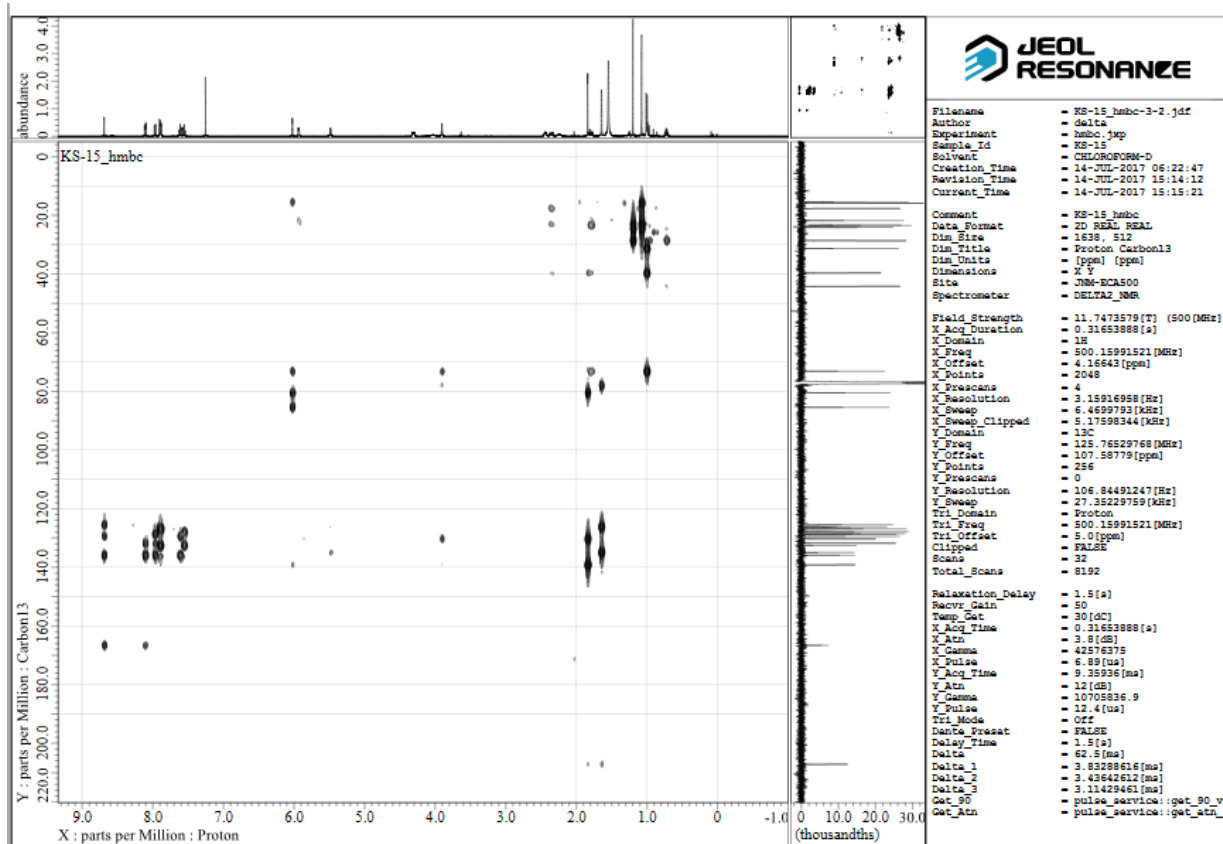

The HMBC spectrum of compound **14b**

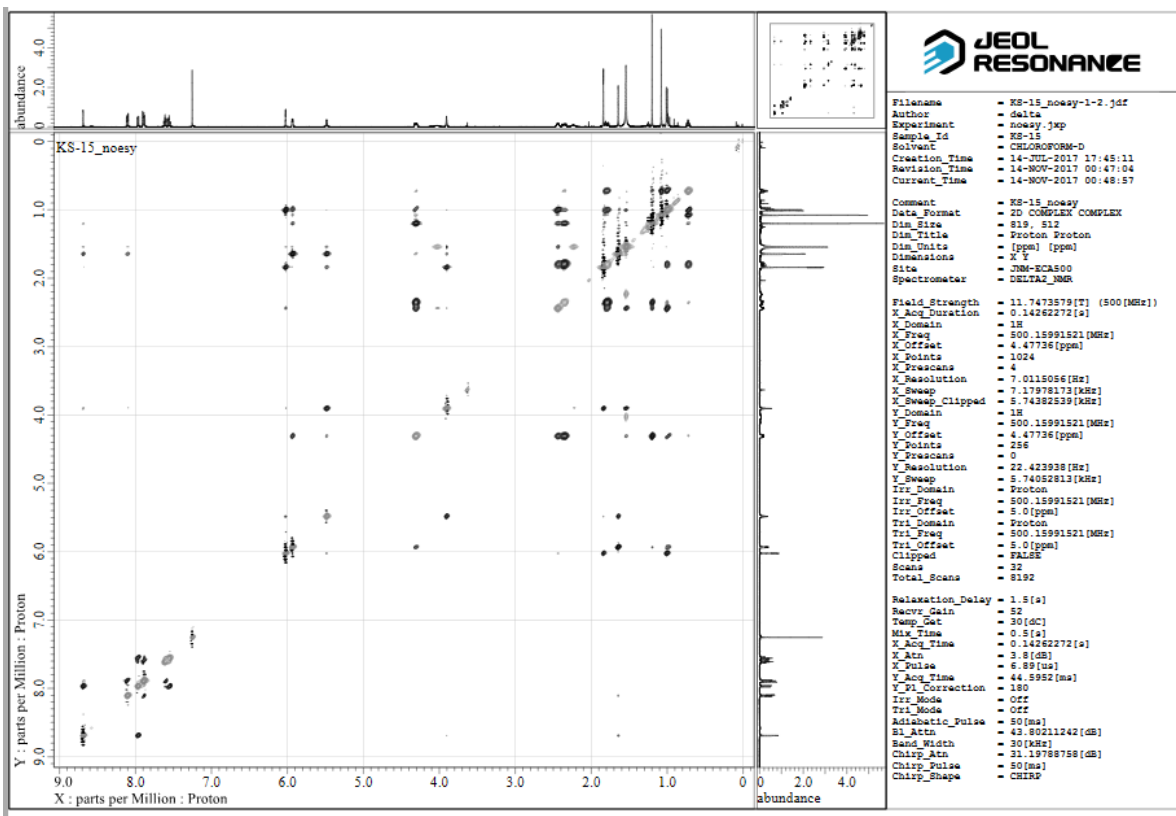

The NOESY spectrum of compound **14b**

[Mass Spectrum]  
 Data : KS-3Na-FABpHRI-NBA Date : 18-Aug-2017 15:27  
 Instrument : MStation  
 Sample : KS-3  
 Note : -  
 Inlet : Direct Ion Mode : FAB+  
 Spectrum Type : Normal Ion [EF-Linear]  
 RT : 3.94 min Scan# : 14 Temp : 3276.7 deg.C  
 BP : m/z 423.2146 Int. : 1599.99 (16777072)  
 Output m/z range : 370 to 510 Cut Level : 0.00 %

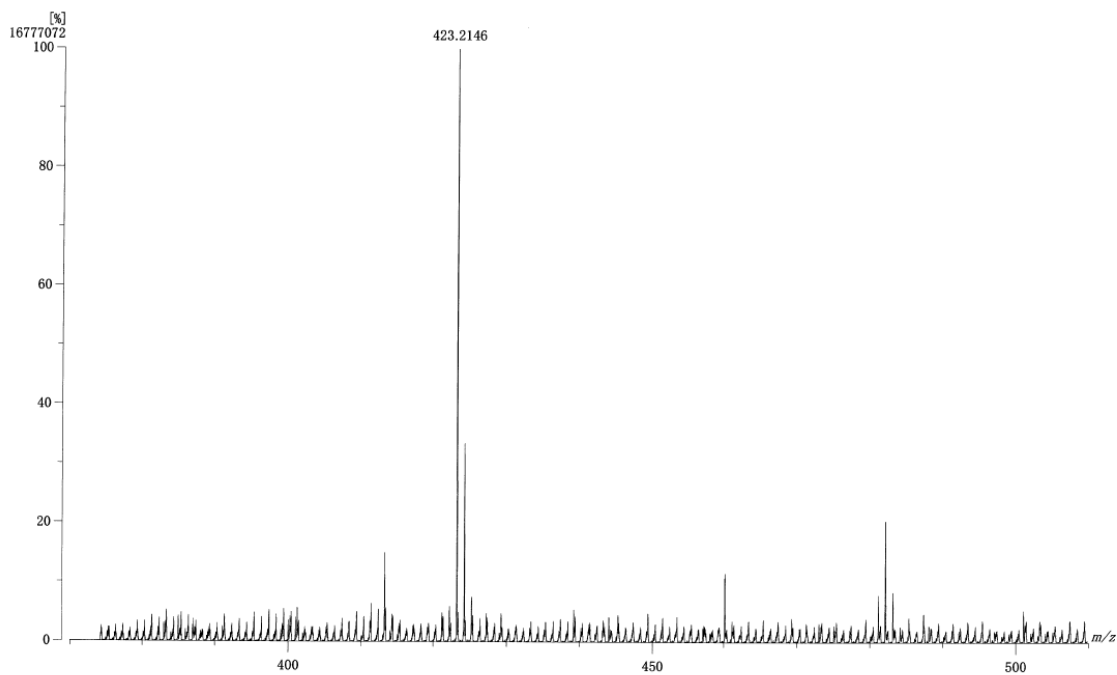

The HRFABMS spectrum of compound **15a**

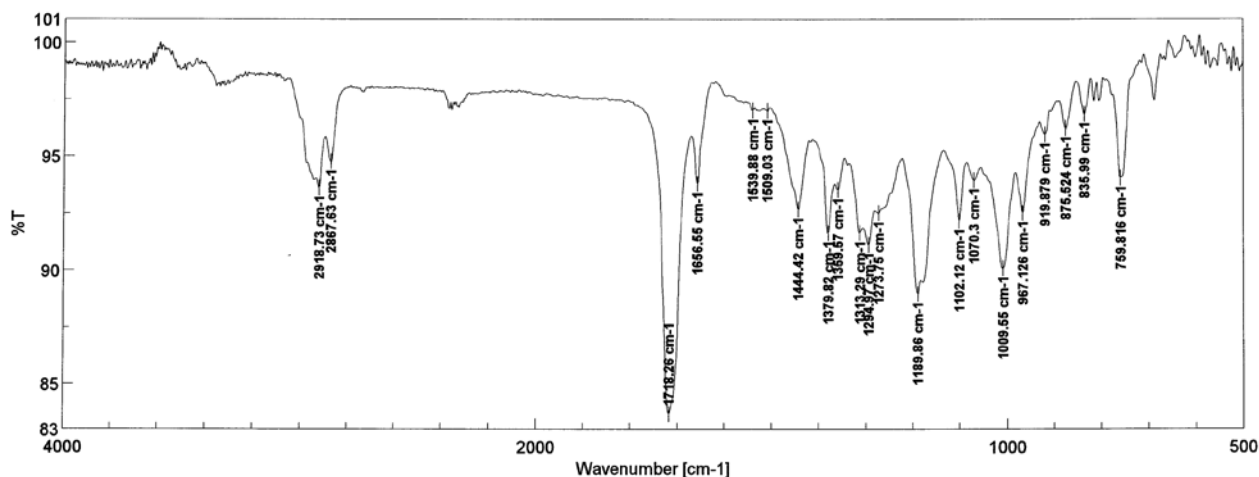

|                                                                                                                                                                                                                                                                                                                                                                         |                                                                                                                                                                                                                                                                                                                                                                         |                 |
|-------------------------------------------------------------------------------------------------------------------------------------------------------------------------------------------------------------------------------------------------------------------------------------------------------------------------------------------------------------------------|-------------------------------------------------------------------------------------------------------------------------------------------------------------------------------------------------------------------------------------------------------------------------------------------------------------------------------------------------------------------------|-----------------|
| <p><b>[コメント情報]</b><br/>         試料名 KS-4<br/>         コメント<br/>         測定者<br/>         所属<br/>         会社</p> <p><b>[データ情報]</b><br/>         作成日時 2017/07/26 13:08<br/>         データタイプ 等間隔データ<br/>         横軸 Wavenumber [cm-1]<br/>         縦軸 %T<br/>         スタート 0 cm-1<br/>         エンド 7800.65 cm-1<br/>         データ間隔 0.964233 cm-1<br/>         データ数 8091</p> | <p><b>[測定情報]</b><br/>         機種名 FT/IR-4100typeA<br/>         シリアル番号 B109261016</p> <p>光源 標準光源<br/>         検出器 TGS<br/>         積算回数 Auto (178)<br/>         分解 4 cm-1<br/>         ゼロファイリング On<br/>         アポダイゼーション Cosine<br/>         ゲイン Auto (16)<br/>         アパーチャ Auto (7.1 mm)<br/>         スキャンスピード Auto (2 mm/sec)<br/>         フィルタ Auto (30000 Hz)</p> | <p>Memory-5</p> |
|-------------------------------------------------------------------------------------------------------------------------------------------------------------------------------------------------------------------------------------------------------------------------------------------------------------------------------------------------------------------------|-------------------------------------------------------------------------------------------------------------------------------------------------------------------------------------------------------------------------------------------------------------------------------------------------------------------------------------------------------------------------|-----------------|

The IR spectrum of compound 15a

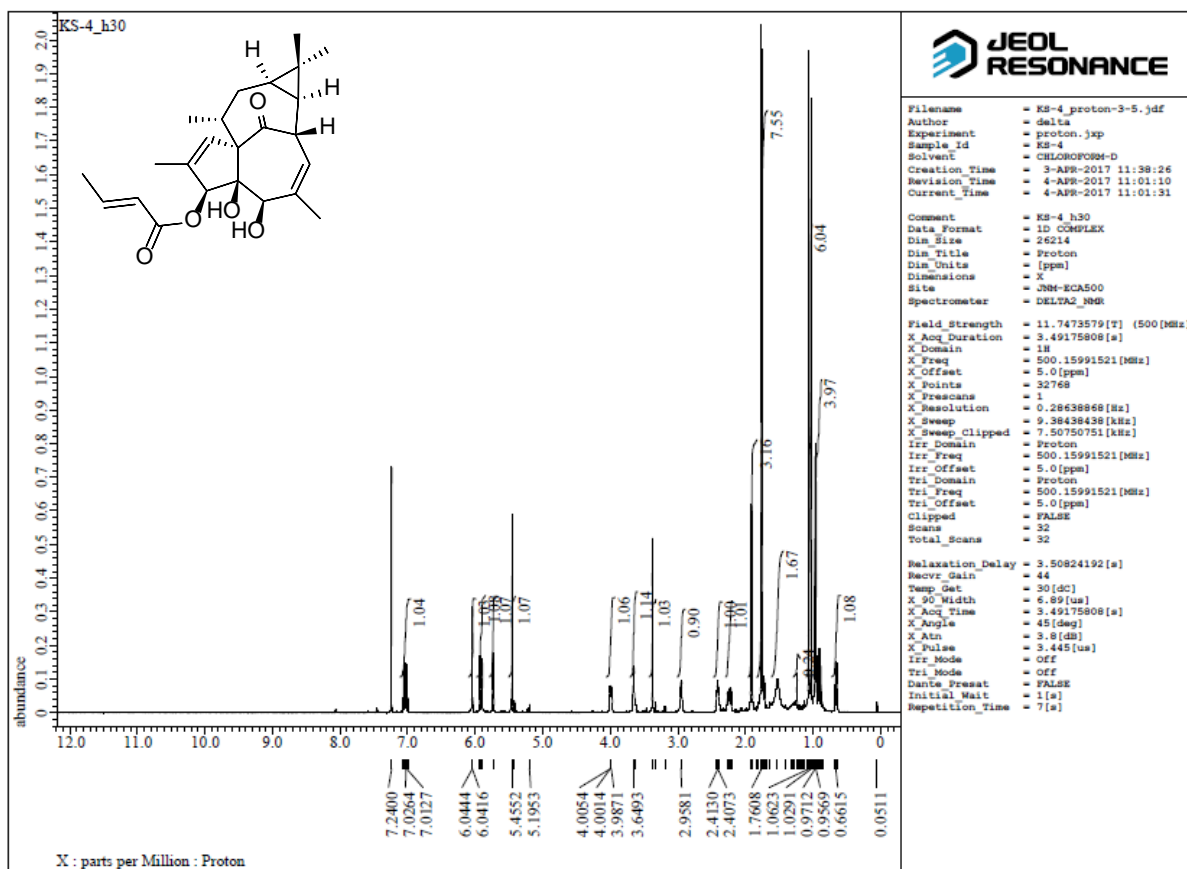

The <sup>1</sup>H spectrum of compound 15a

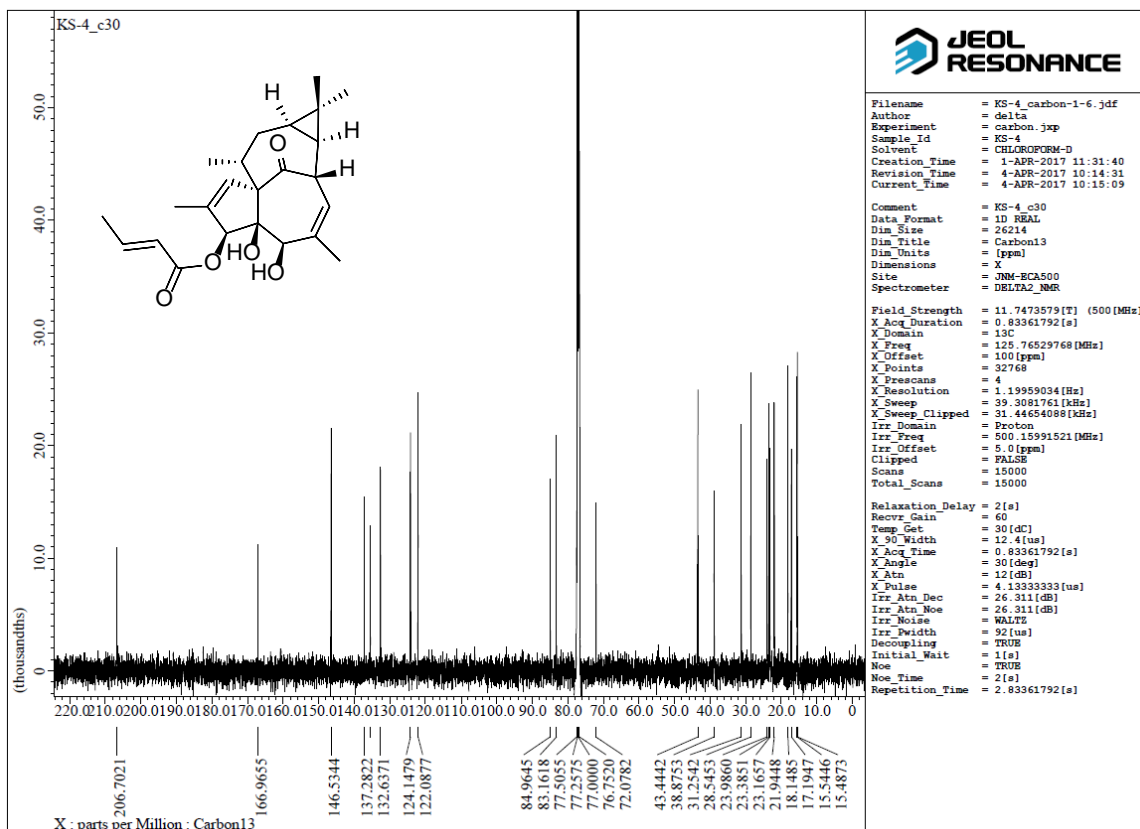

The  $^{13}\text{C}$  spectrum of compound 15a

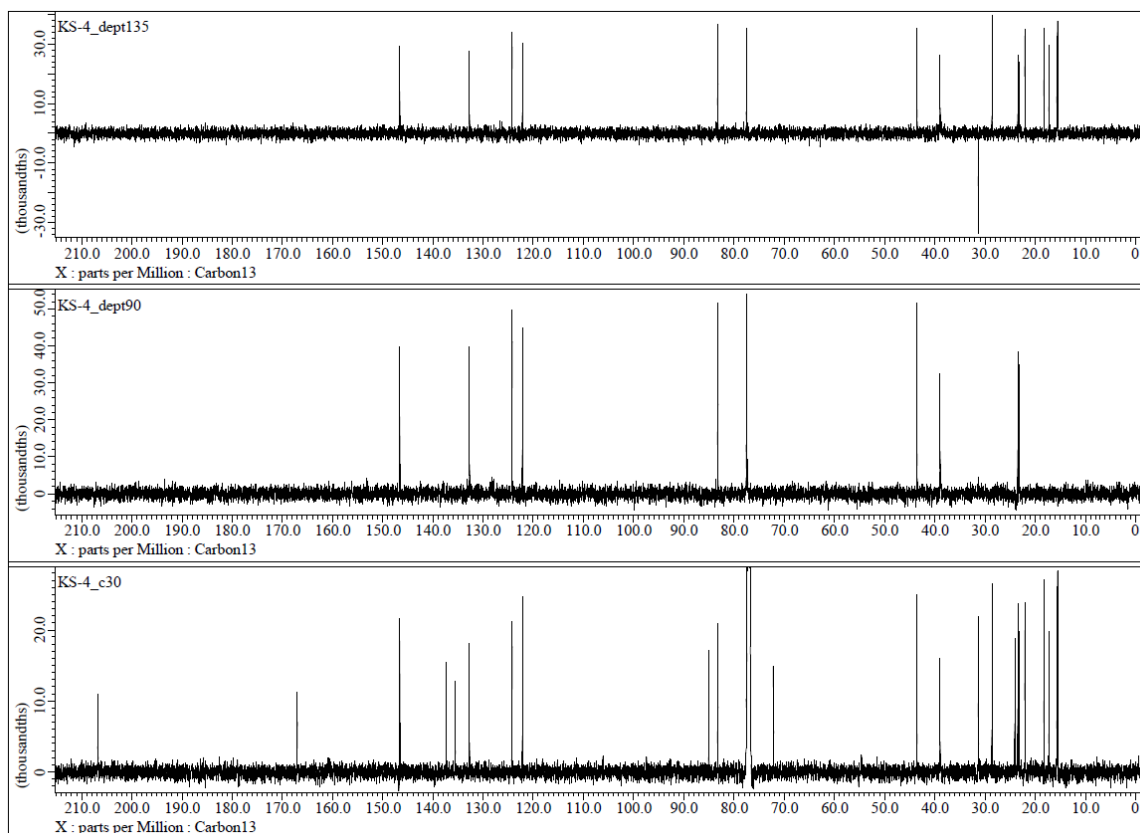

The DEPT of compound 15a

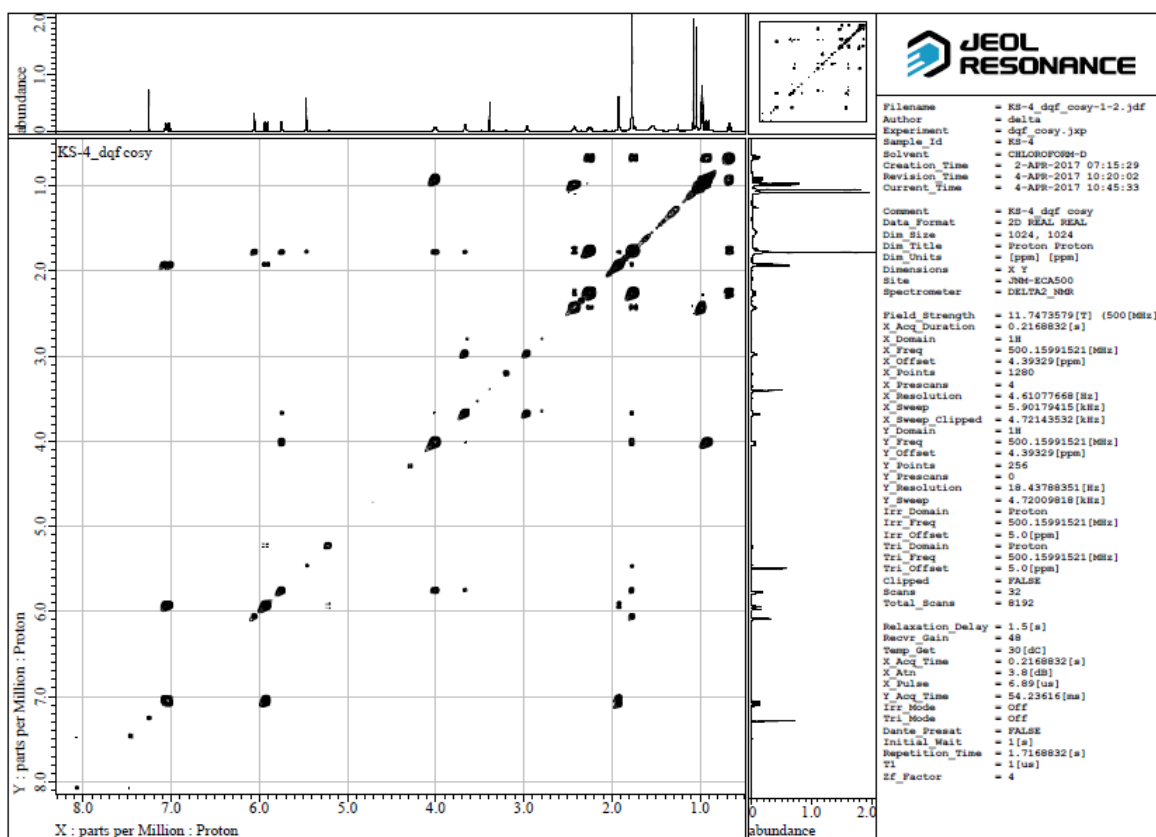

The DQF\_COSY of compound 15a

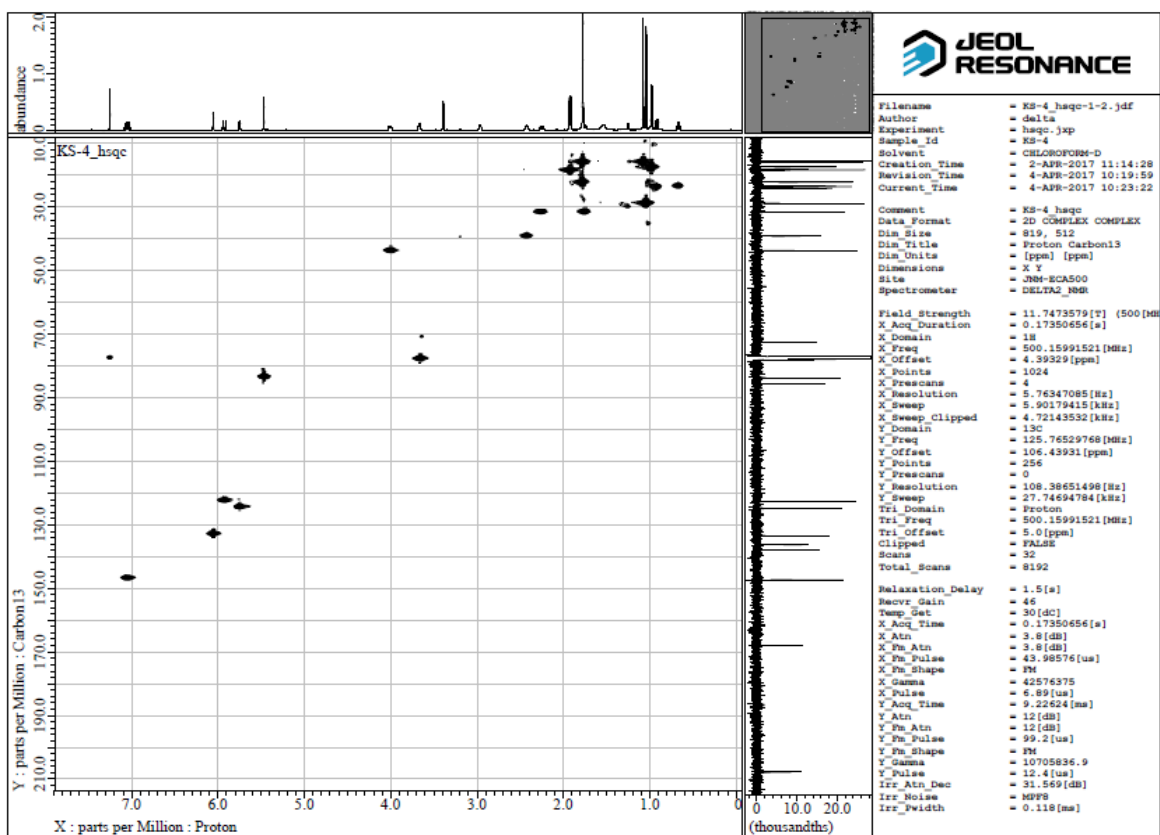

The HSQC of compound 15a



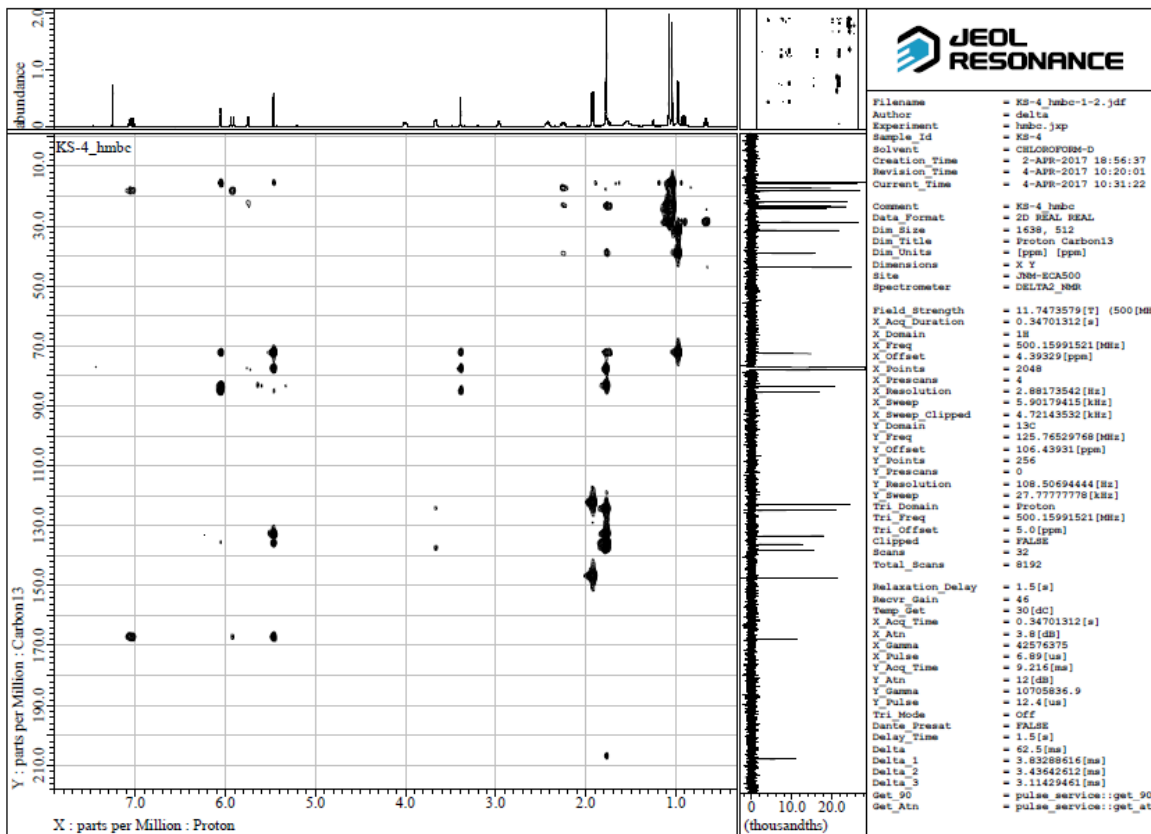

The HMBC of compound 15a

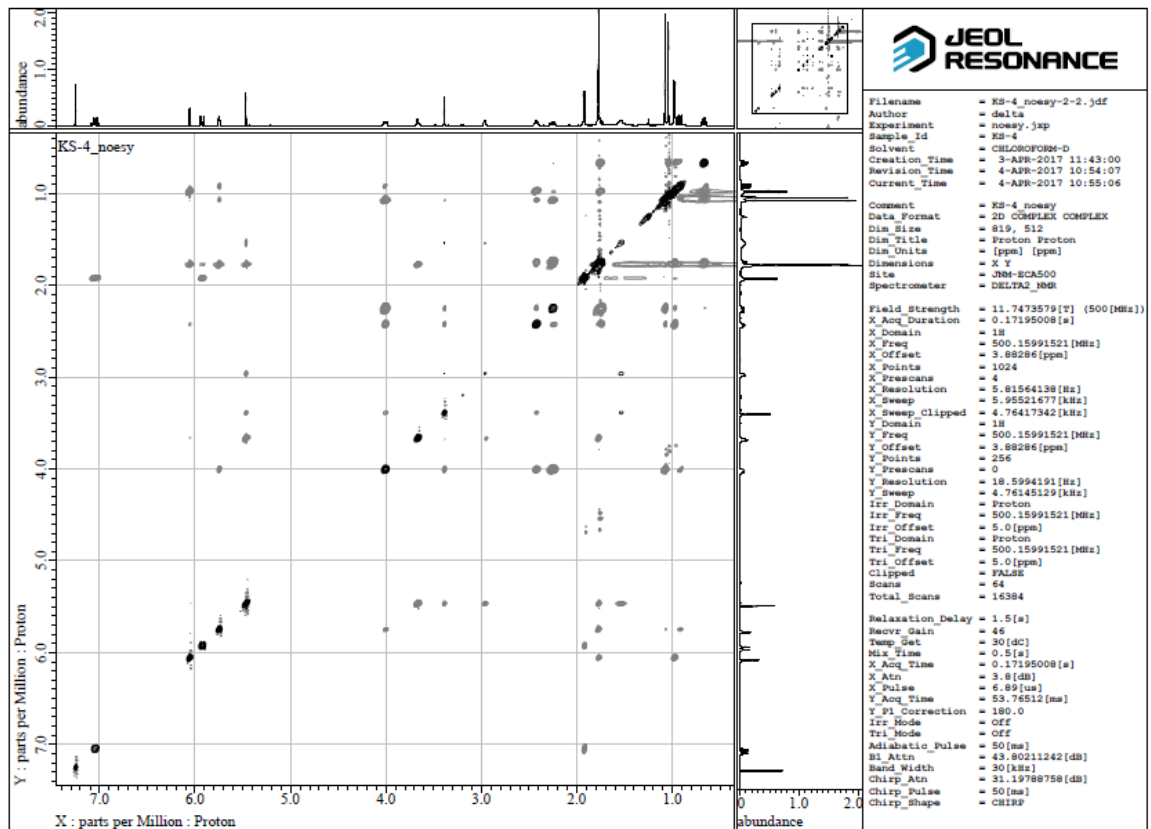

The NOESY of compound 15a



[ Mass Spectrum ]  
 Data : KS-4+Na-FABpHR1-NBA Date : 18-Aug-2017 12:24  
 Instrument : MStation  
 Sample : KS-4  
 Note : -  
 Inlet : Direct Ion Mode : FAB+  
 Spectrum Type : Normal Ion [EF-Linear]  
 RT : 5.15 min Scan# : 18 Temp : 327.6 deg.C  
 BP : m/z 423.2143 Int. : 1599.99 (16777072)  
 Output m/z range : 370 to 510 Cut Level : 0.00 %

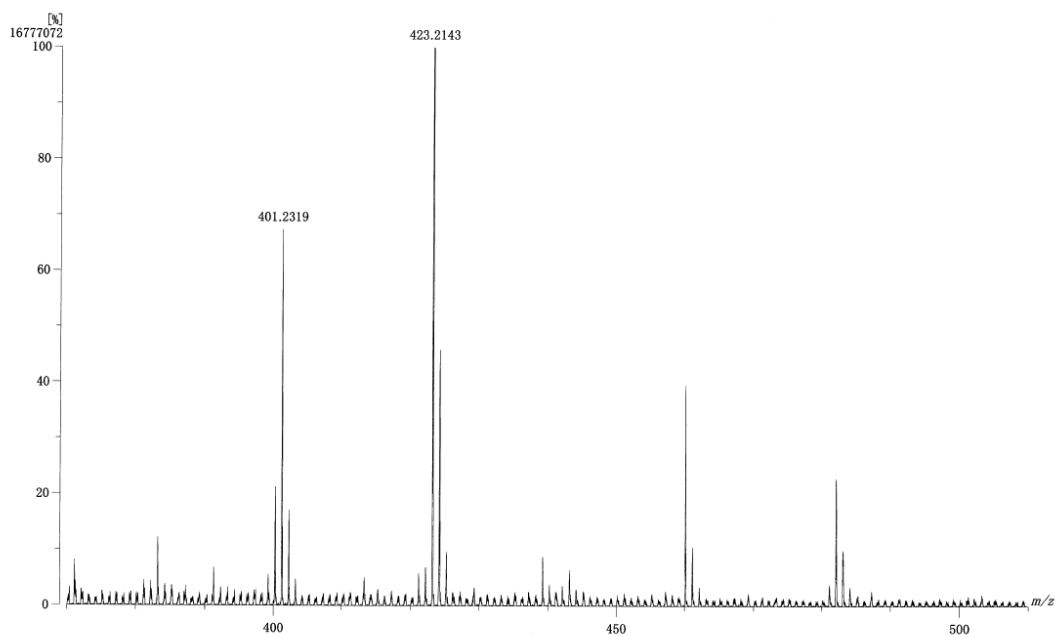

The HRFABMS spectrum of compound **15b**

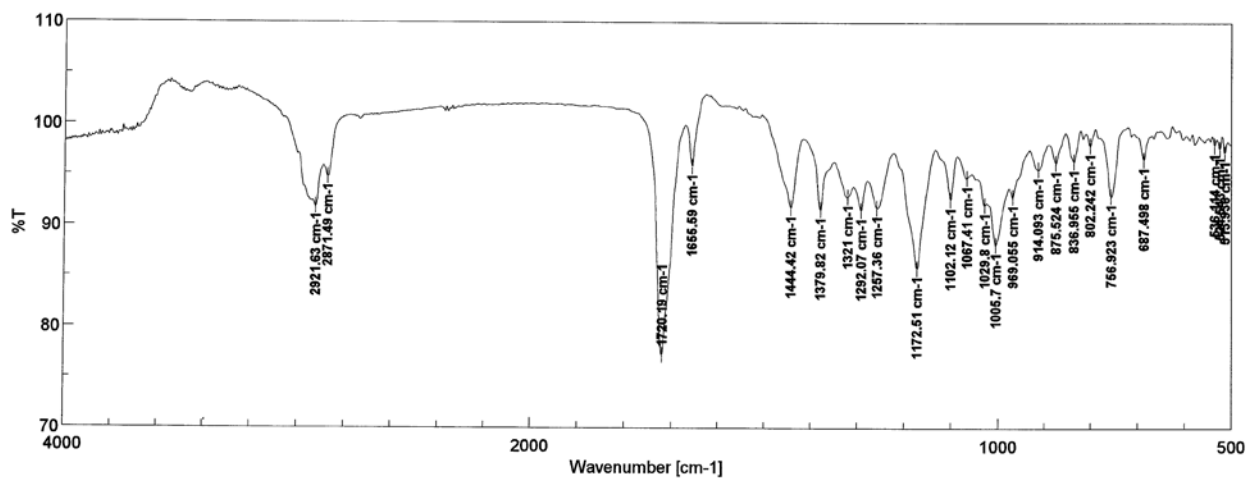

[コメント情報]  
 試料名 KS-3  
 コメント  
 測定者 B  
 所属 東邦大学 薬学部  
 会社  
 [データ情報]  
 作成日時 2017/07/26 12:54  
 データタイプ 等間隔データ  
 横軸 Wavenumber [cm-1]  
 縦軸 %T  
 スタート 0 cm-1  
 エンド 7800.65 cm-1  
 データ間隔 0.964233 cm-1  
 データ数 8091

[測定情報]  
 機種名 FT/IR-4100typeA  
 シリアル番号 B109261016  
 光源 標準光源  
 検出器 TGS  
 積算回数 Auto (188)  
 分解 4 cm-1  
 ゼロフライング On  
 アポダイゼーション Cosine  
 ゲイン Auto (16)  
 アパーチャ Auto (7.1 mm)  
 スキャンスピード Auto (2 mm/sec)  
 フィルタ Auto (30000 Hz)

Memory-2

The IR spectrum of compound **KS-3**

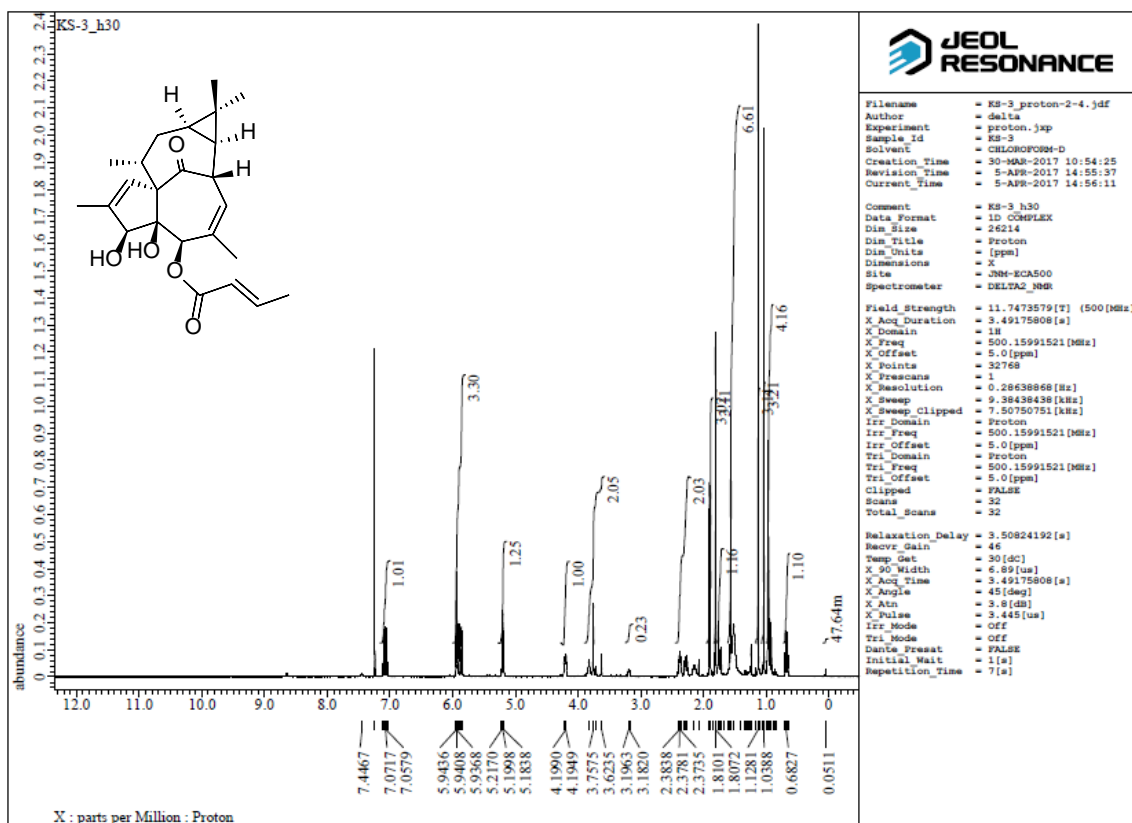

The  $^1\text{H}$  spectrum of compound 15b

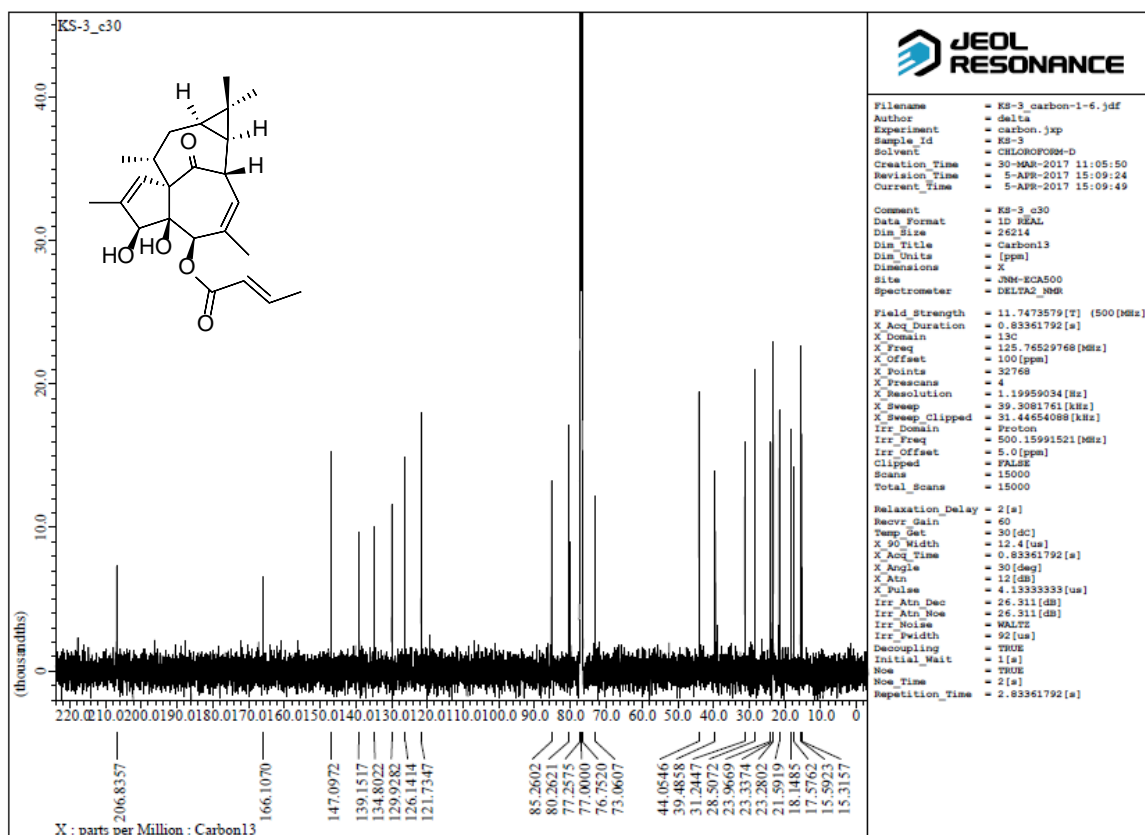

The  $^{13}\text{C}$  spectrum of compound 15b

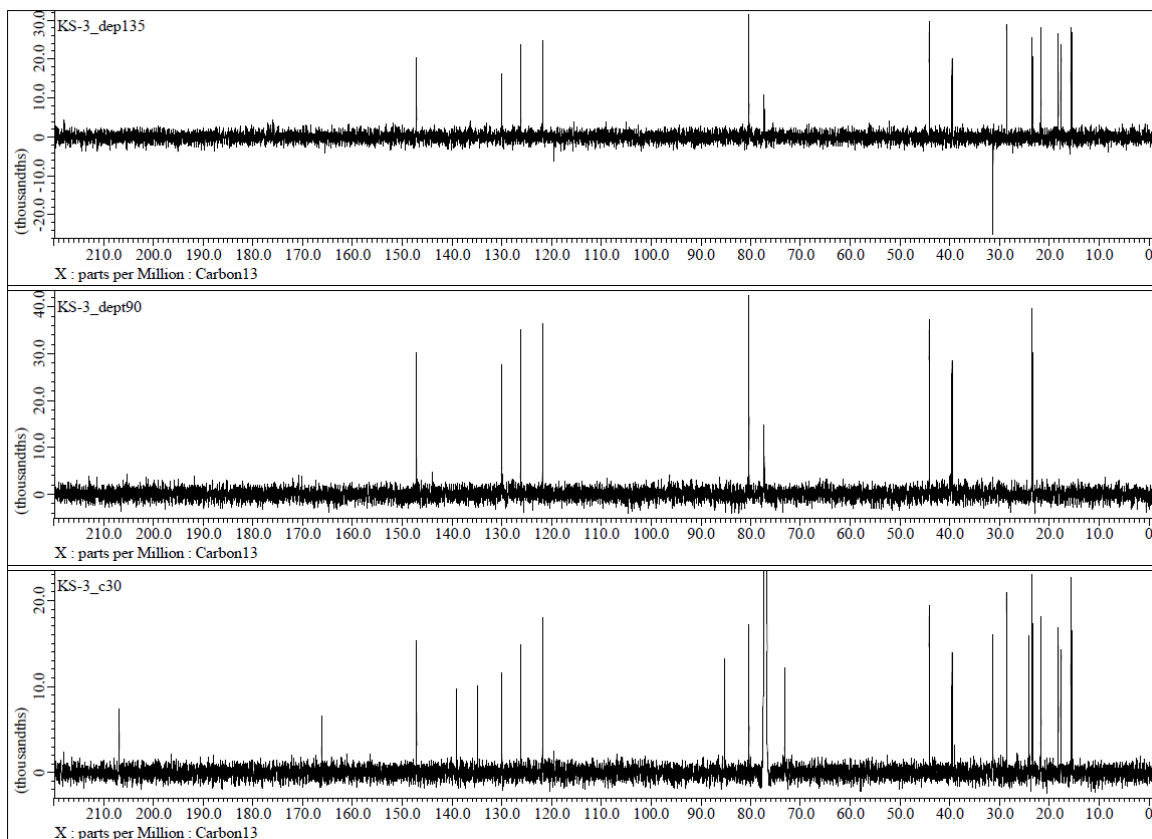

The DEPT spectrum of compound **15b**

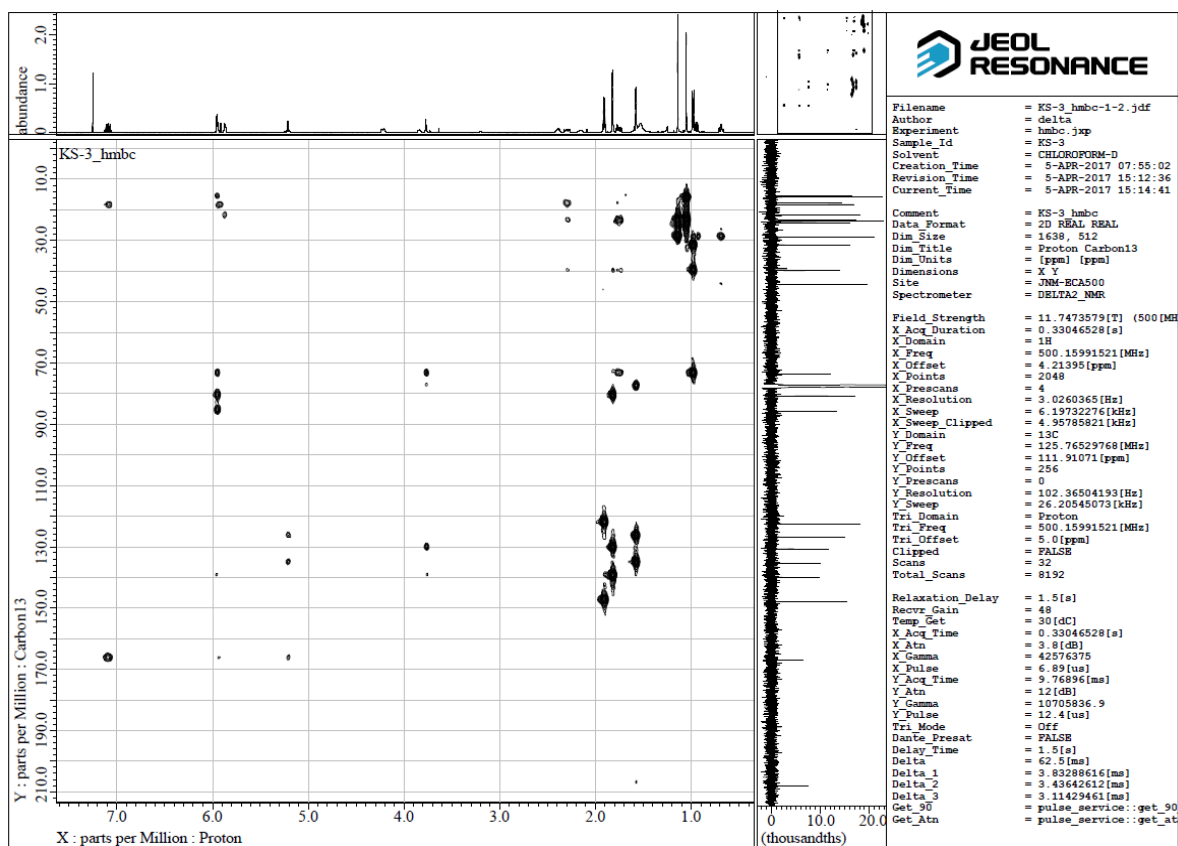

The DQF\_COSY spectrum of compound **15b**

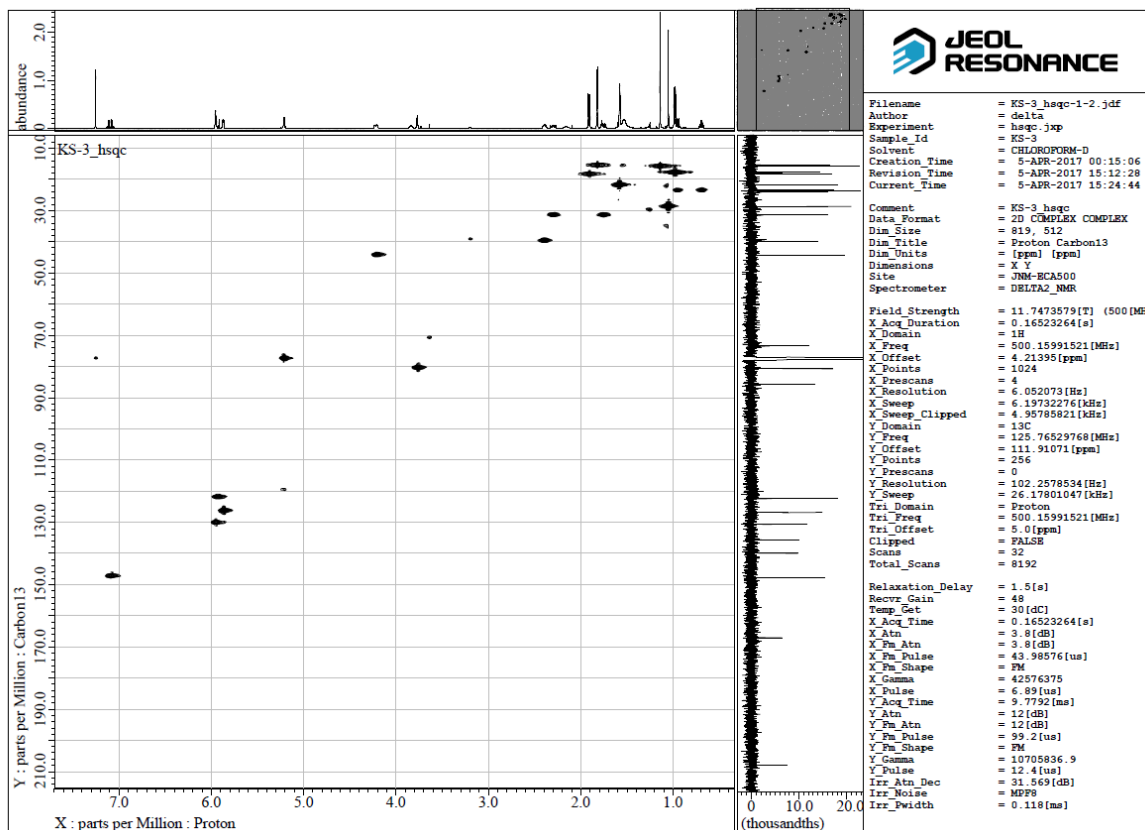

The HSQC spectrum of compound **15b**

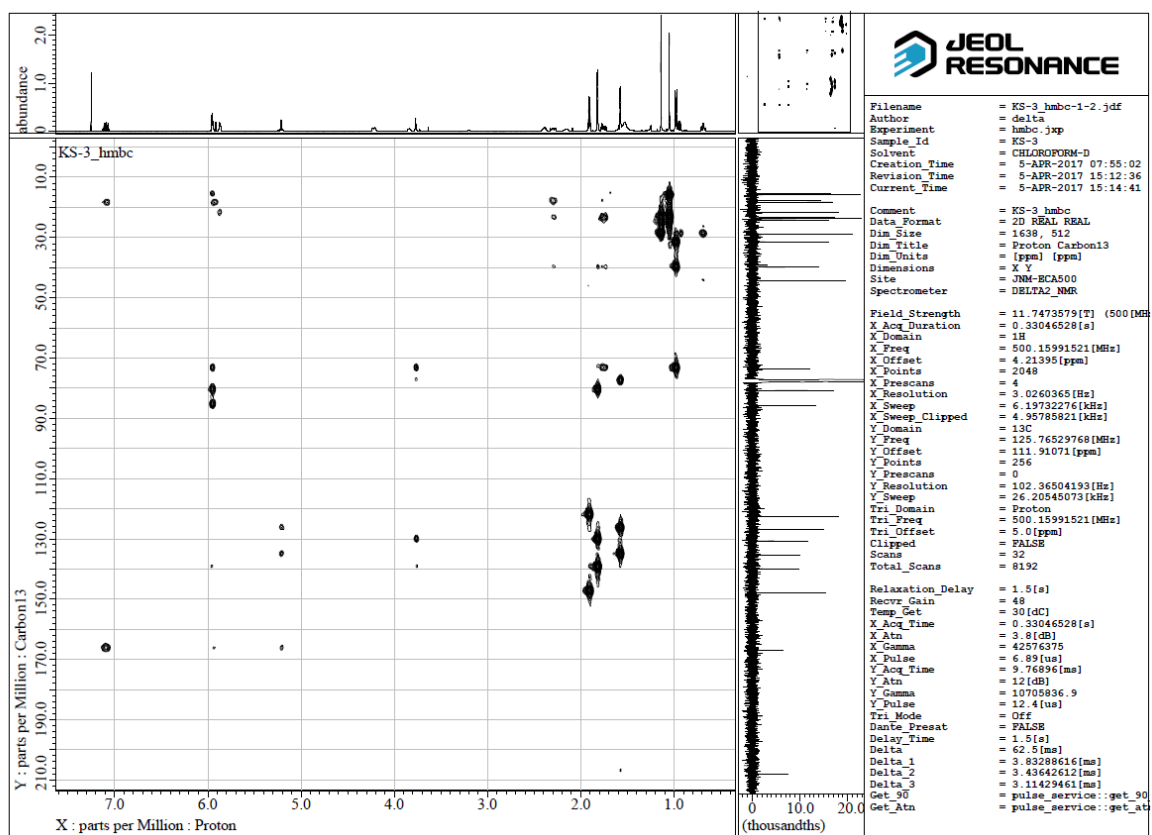

The HMBC spectrum of compound **15b**

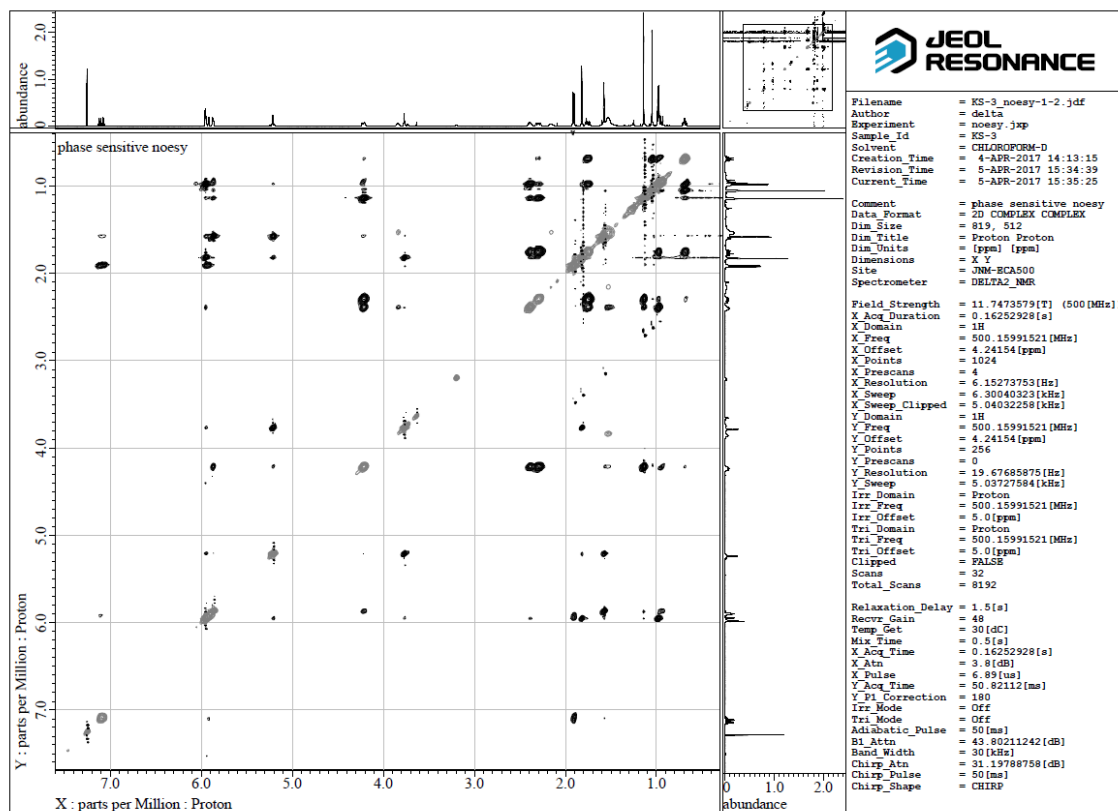

The NOESY spectrum of compound **15b**

測定データ名: KS-8.02  
 作成条件: 平均(MS[1]) 経過時間: 0.62..0.83  
 x10<sup>3</sup> 面積 (10121)

実験日時: 2017/10/07 17:13:26  
 イオン化モード: ESI+

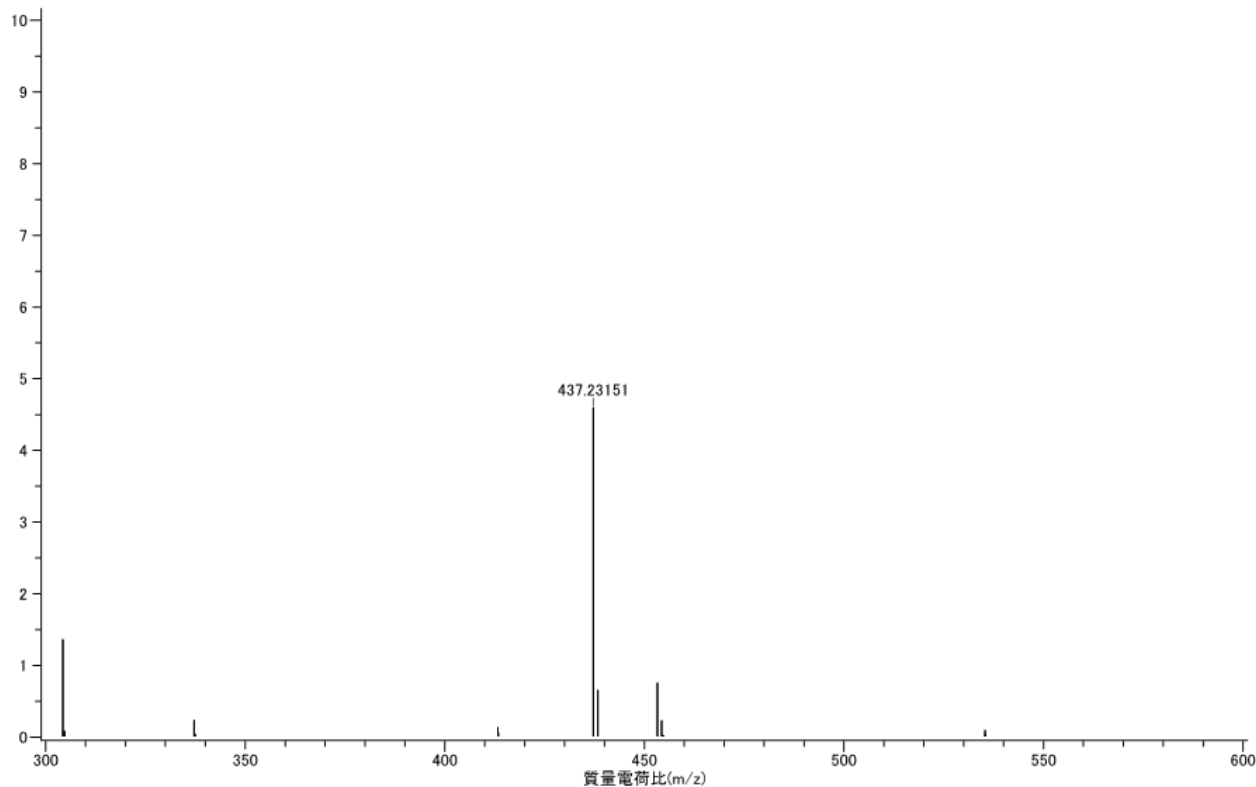

The HRESIMS spectrum of compound **16**

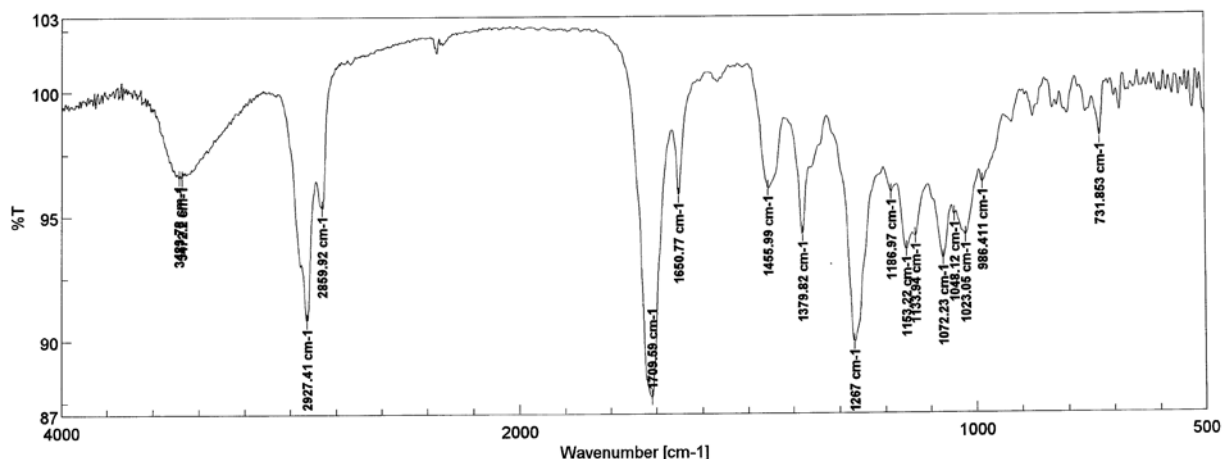

[コメント情報]

試料名 KS-8  
 コメント  
 測定者 B  
 所属 東邦大学 薬学部  
 会社

[データ情報]

作成日時 2017/07/26 14:35  
 データタイプ 等間隔データ  
 横軸 Wavenumber [cm-1]  
 縦軸 %T  
 スタート 0 cm-1  
 エンド 7800.65 cm-1  
 データ間隔 0.964233 cm-1  
 データ数 8091

[測定情報]

機種名 FT/IR-4100typeA  
 シリアル番号 B109261016  
 光源 標準光源  
 検出器 TGS  
 積算回数 Auto (174)  
 分解 4 cm-1  
 ゼロフリンジ On  
 アポダイゼーション Cosine  
 ゲイン Auto (16)  
 アパーチャー Auto (7.1 mm)  
 スキャンスピード Auto (2 mm/sec)  
 フィルタ Auto (30000 Hz)

Memory-2

The IR spectrum of compound 16

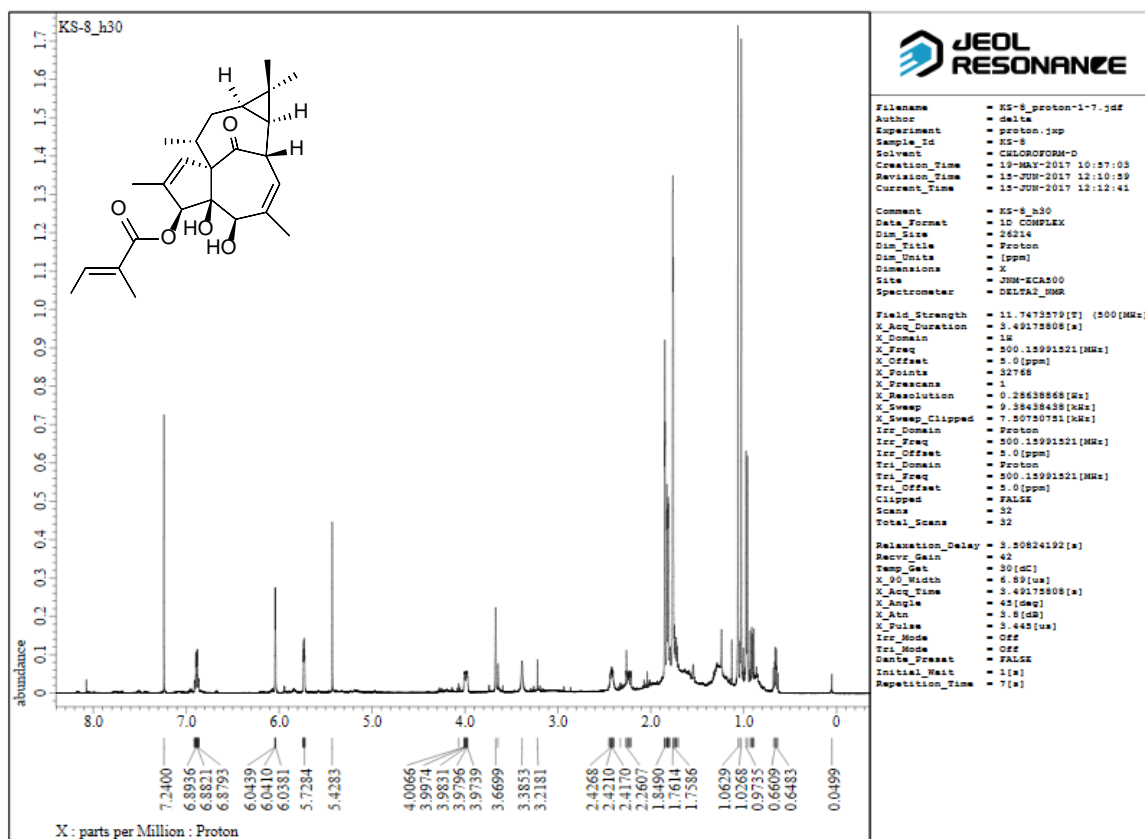

The <sup>1</sup>H spectrum of compound 16

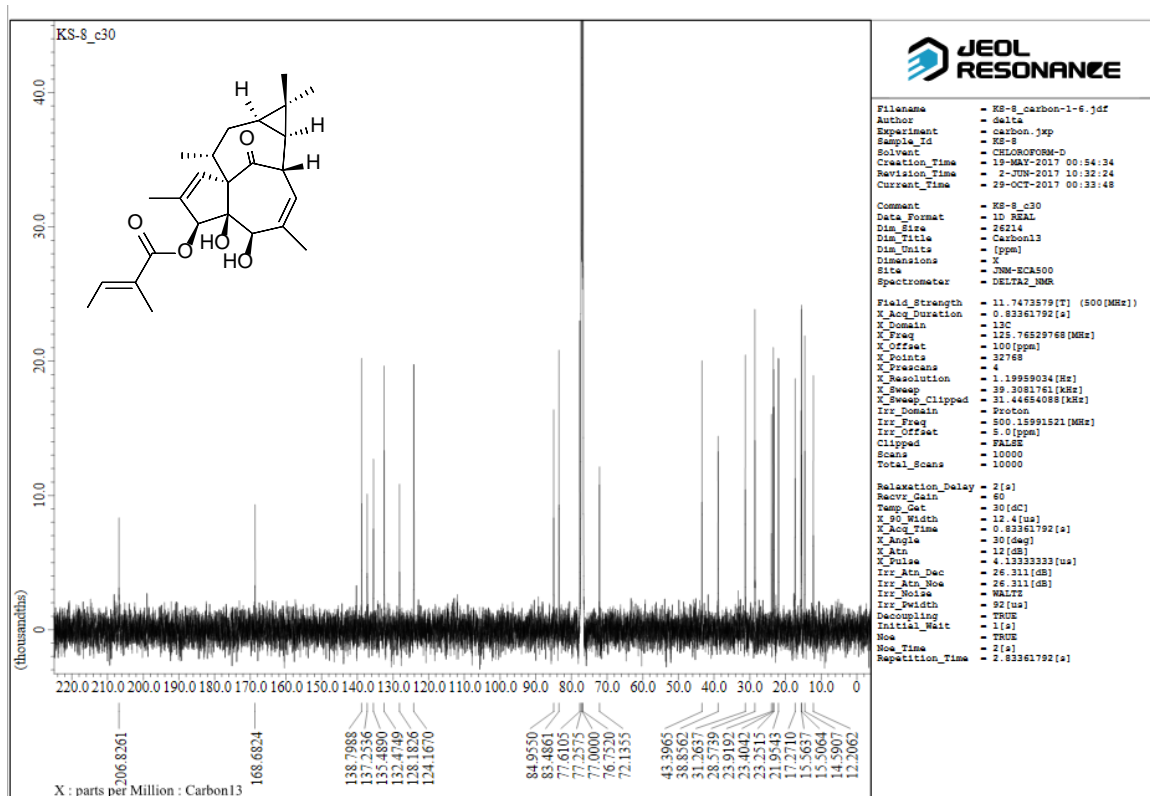

The  $^{13}\text{C}$  spectrum of compound 16

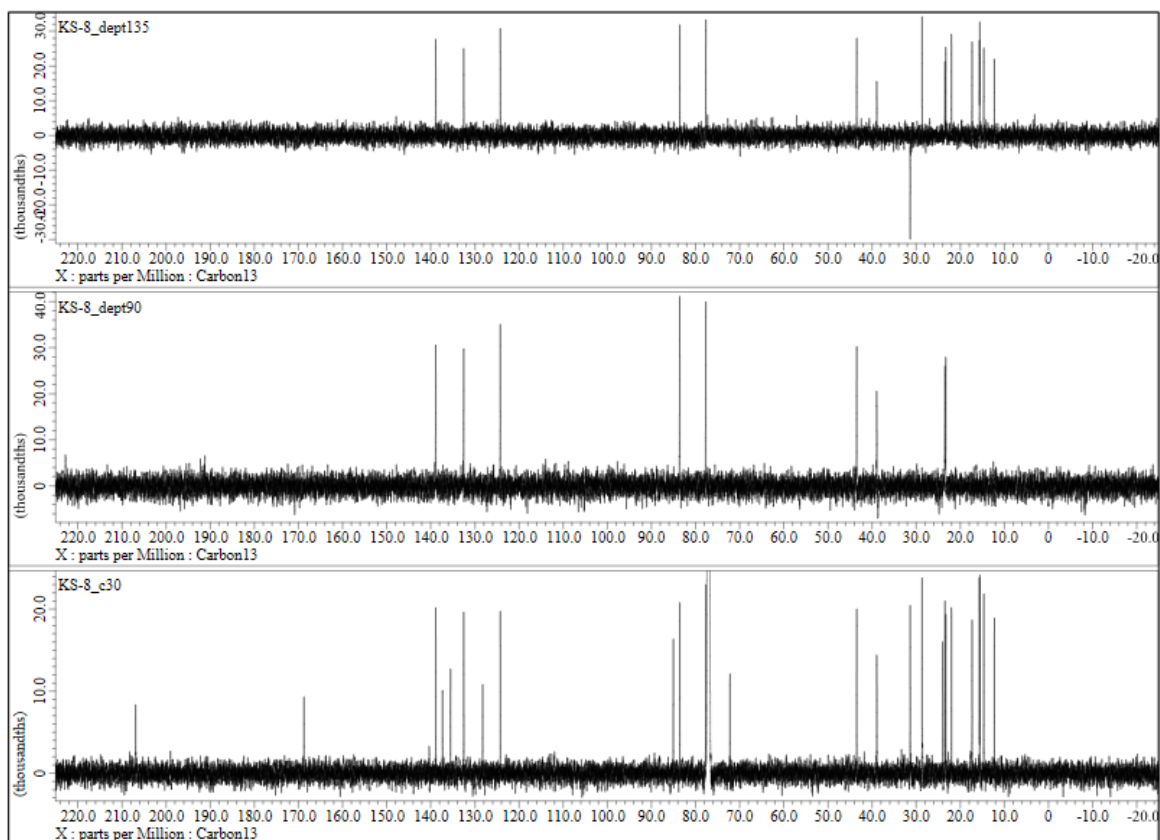

The DEPT spectrum of compound 16

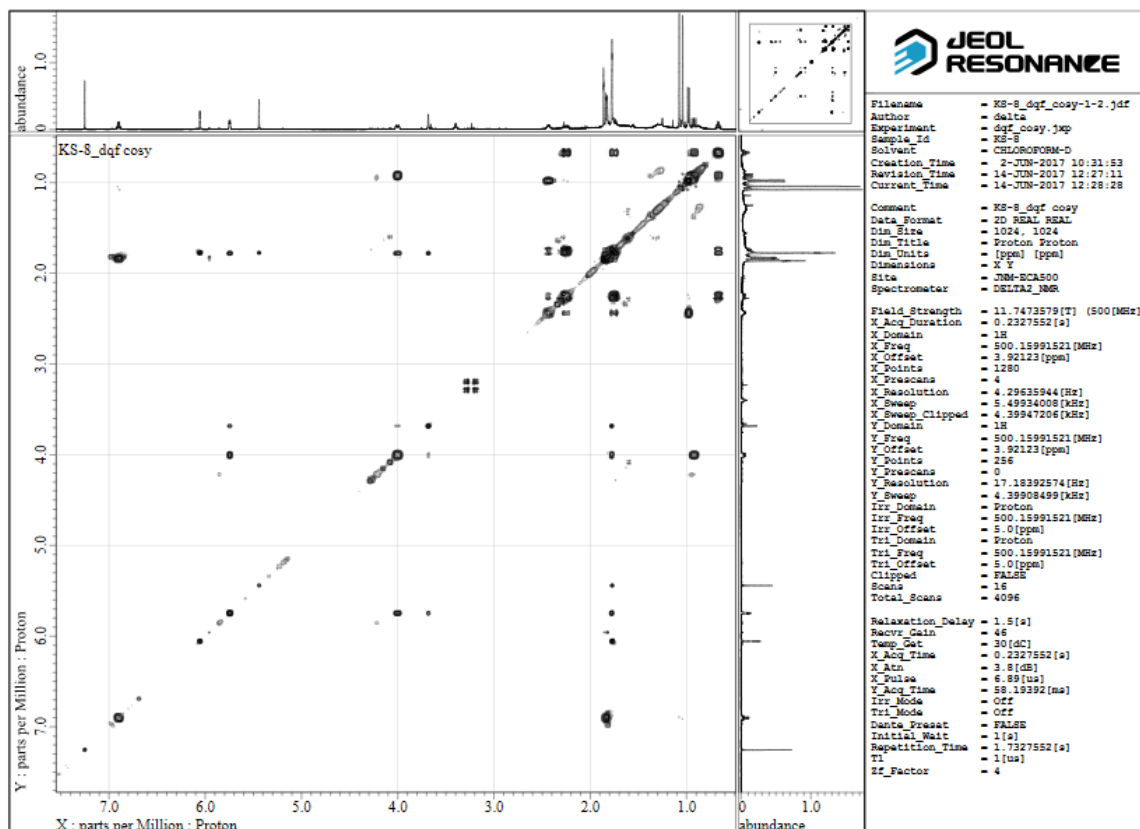

The DQF\_COSY spectrum of compound 16

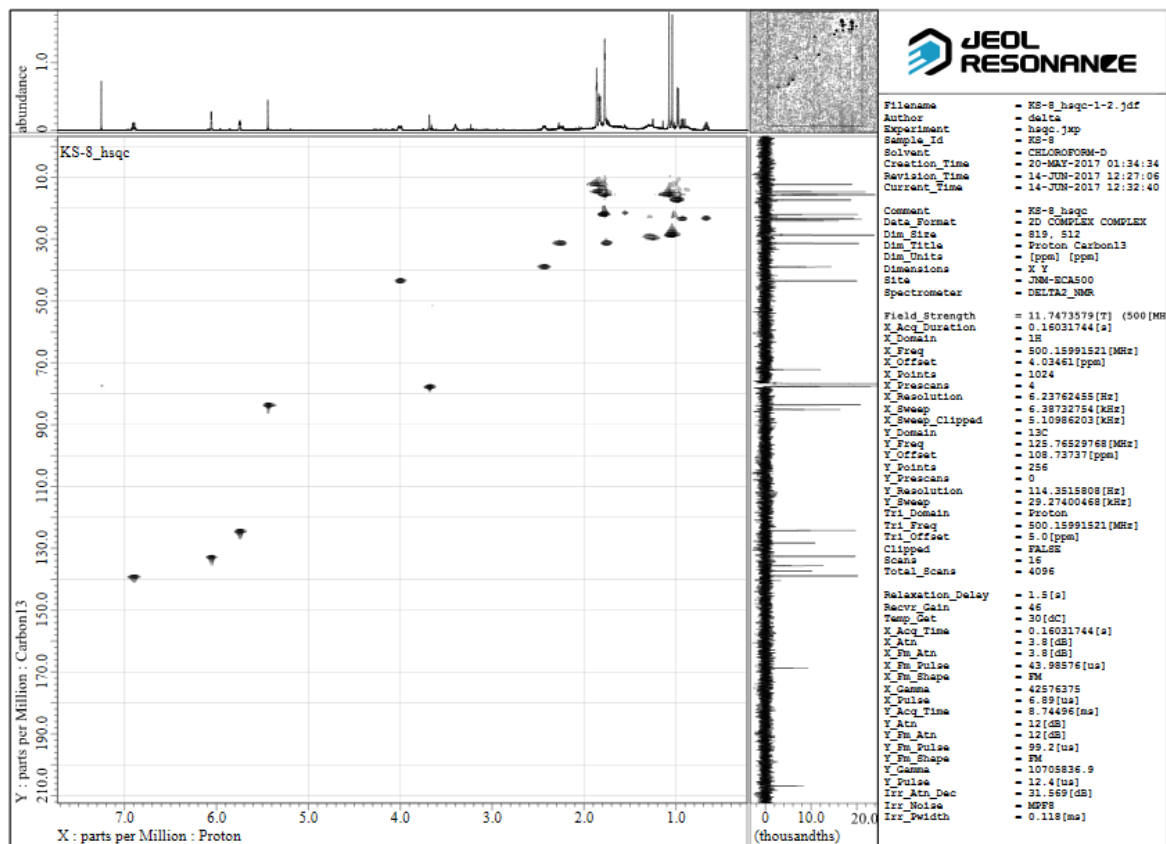

The HSQC spectrum of compound 16



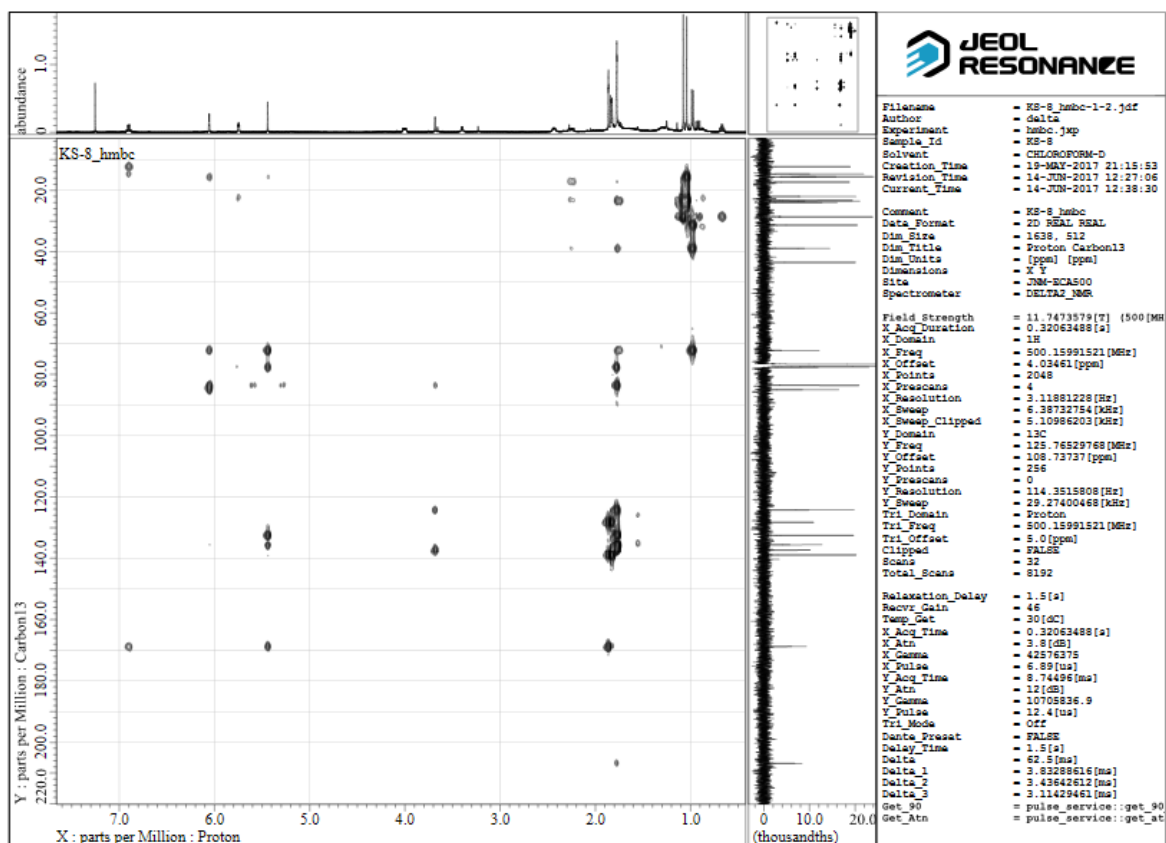

The HMBC spectrum of compound 16

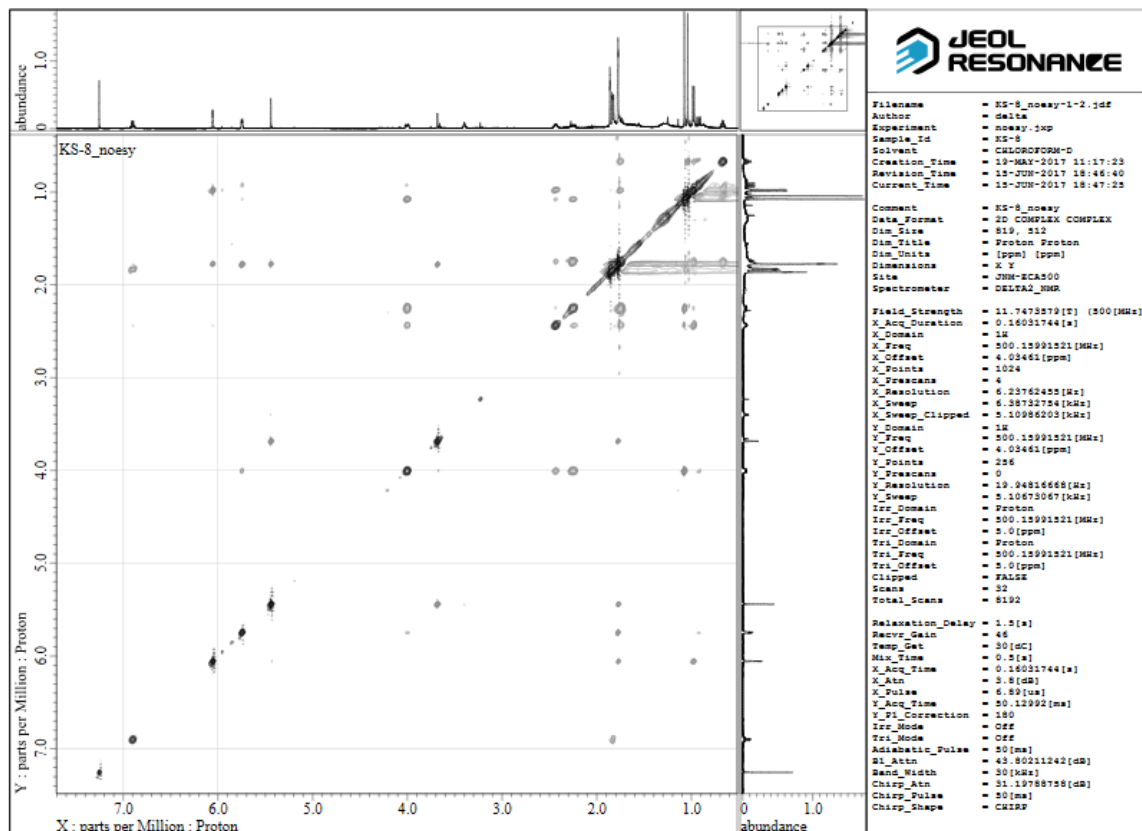

The NOESY spectrum of compound 16

測定データ名: KS-9\_04  
 作成条件: 平均(MS[1] 経過時間: 1.22.2.65)

実験日時: 2017/10/07 21:09:03  
 イオン化モード: ESI+

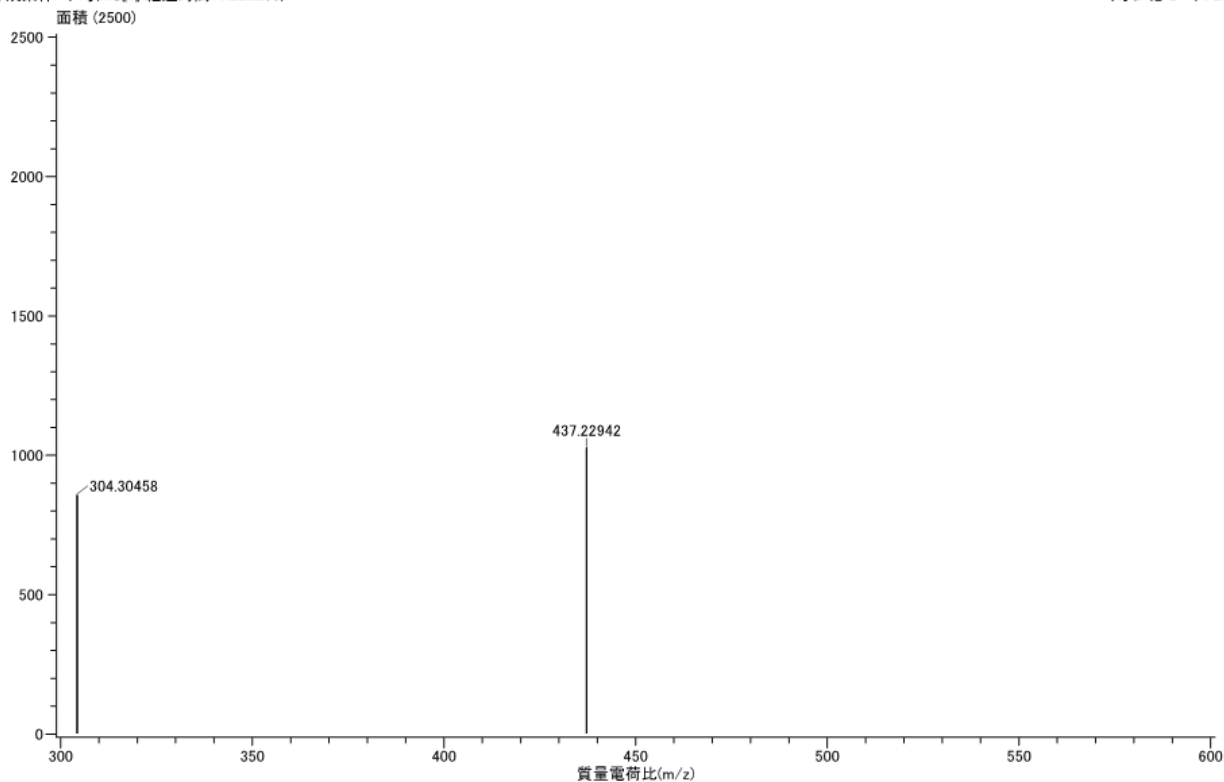

The HRESIMS spectrum of compound 17

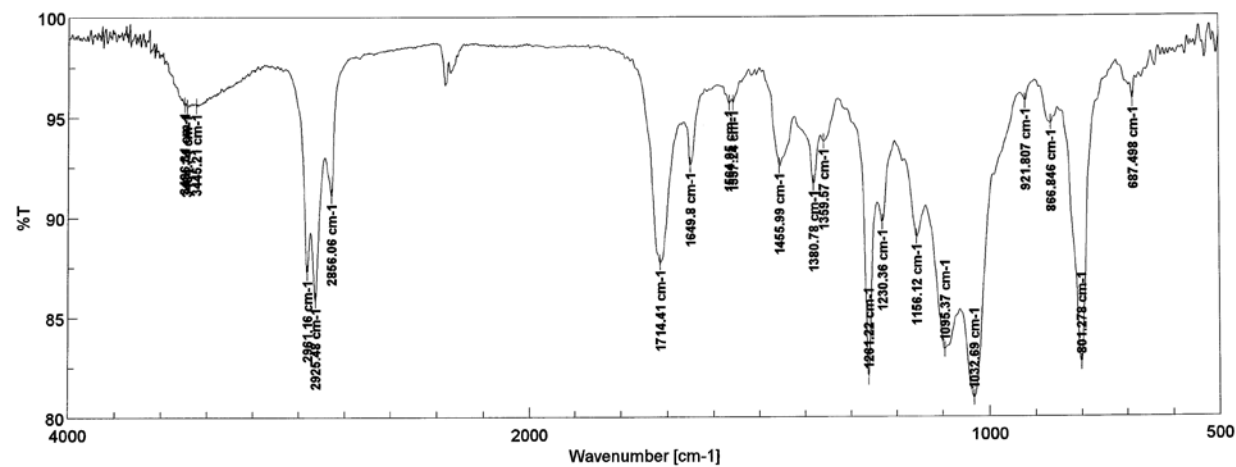

[コメント情報]  
 試料名 KS-9  
 コメント  
 測定者 B  
 所属 東邦大学 薬学部  
 会社  
 [データ情報]  
 作成日時 2017/07/26 14:49  
 データタイプ 等間隔データ  
 横軸 Wavenumber [cm-1]  
 縦軸 %T  
 スタート 0 cm-1  
 エンド 7800.65 cm-1  
 データ間隔 0.964233 cm-1  
 データ数 8091

[測定情報]  
 機種名 FT/IR-4100typeA  
 シリアル番号 B109261016  
 光源 標準光源  
 検出器 TGS  
 積算回数 Auto (204)  
 分解 4 cm-1  
 ゼロフライング On  
 アポダイゼーション Cosine  
 ゲイン Auto (16)  
 アパーチャ Auto (7.1 mm)  
 スキャンスピード Auto (2 mm/sec)  
 フィルタ Auto (30000 Hz)

The IR spectrum of compound 17

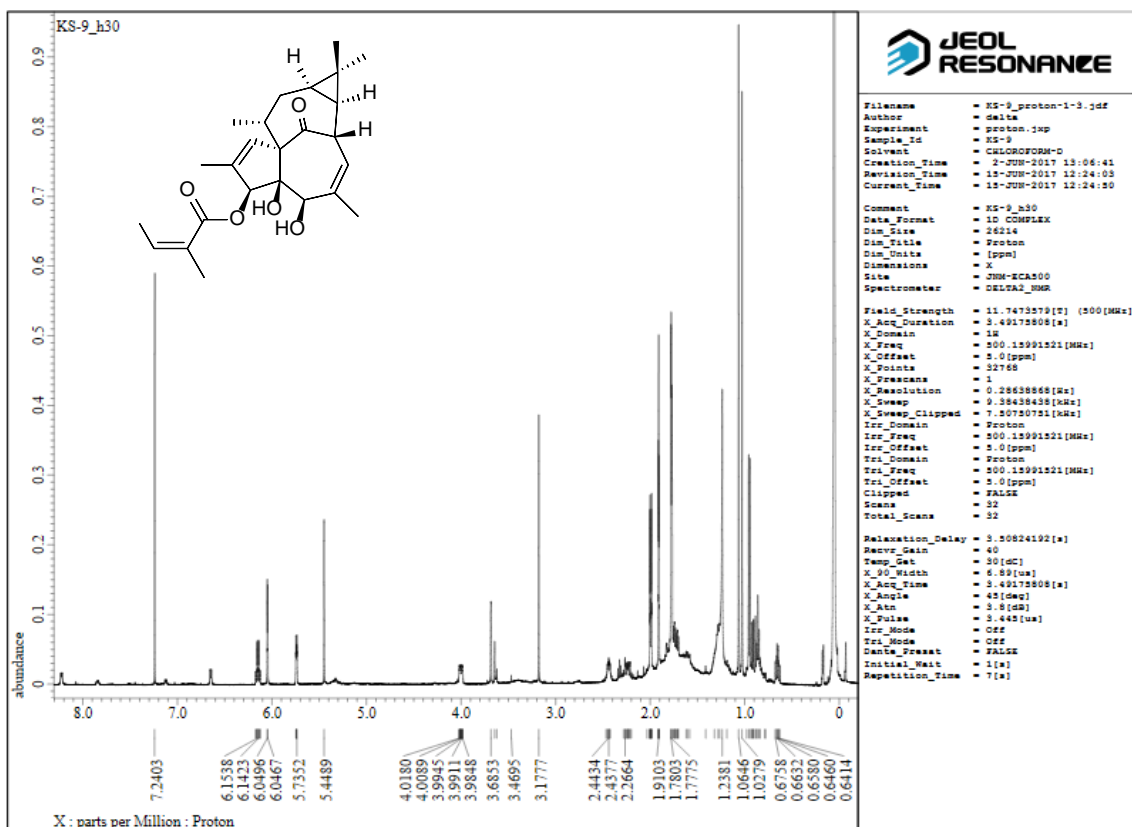

The  $^1\text{H}$  spectrum of compound 17

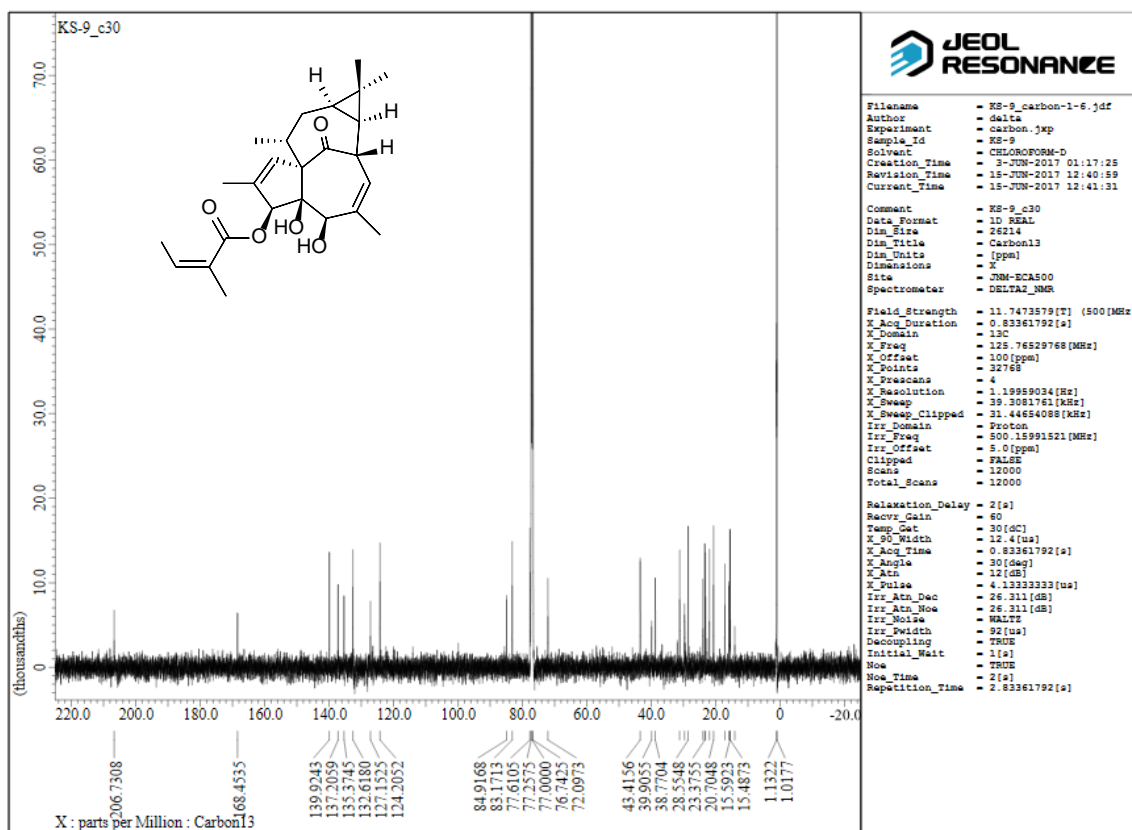

The  $^{13}\text{C}$  spectrum of compound 17

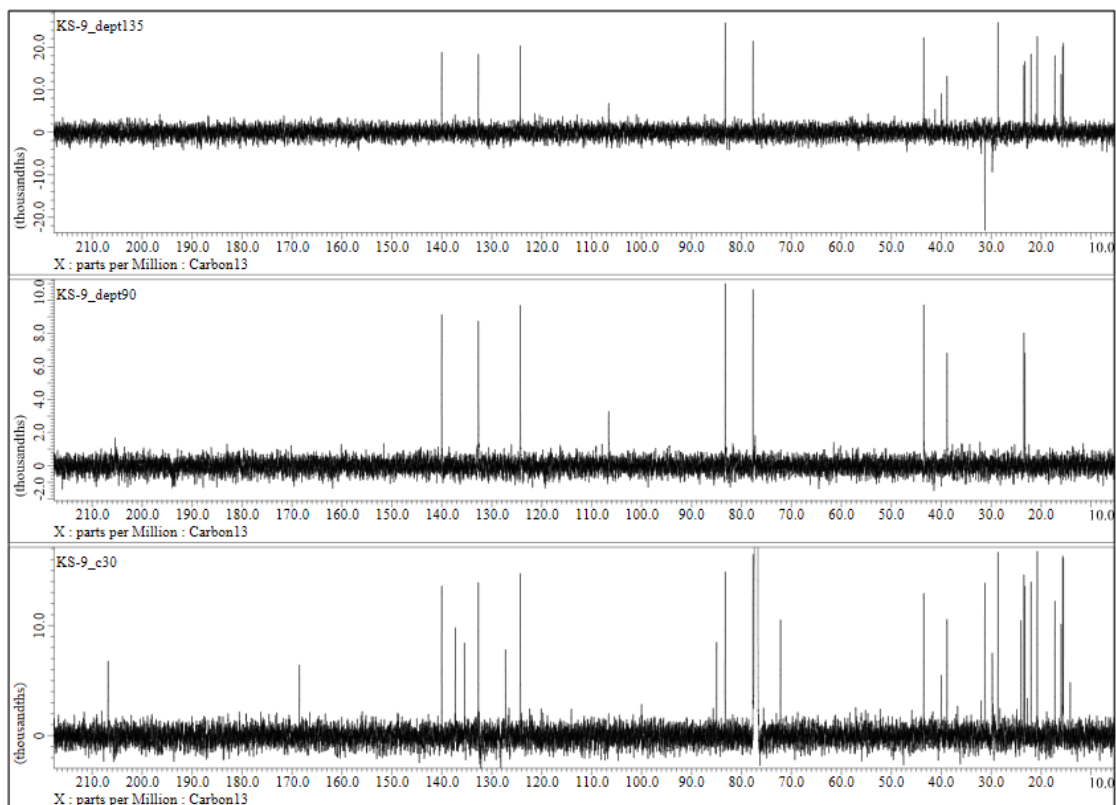

The DEPT spectrum of compound 17

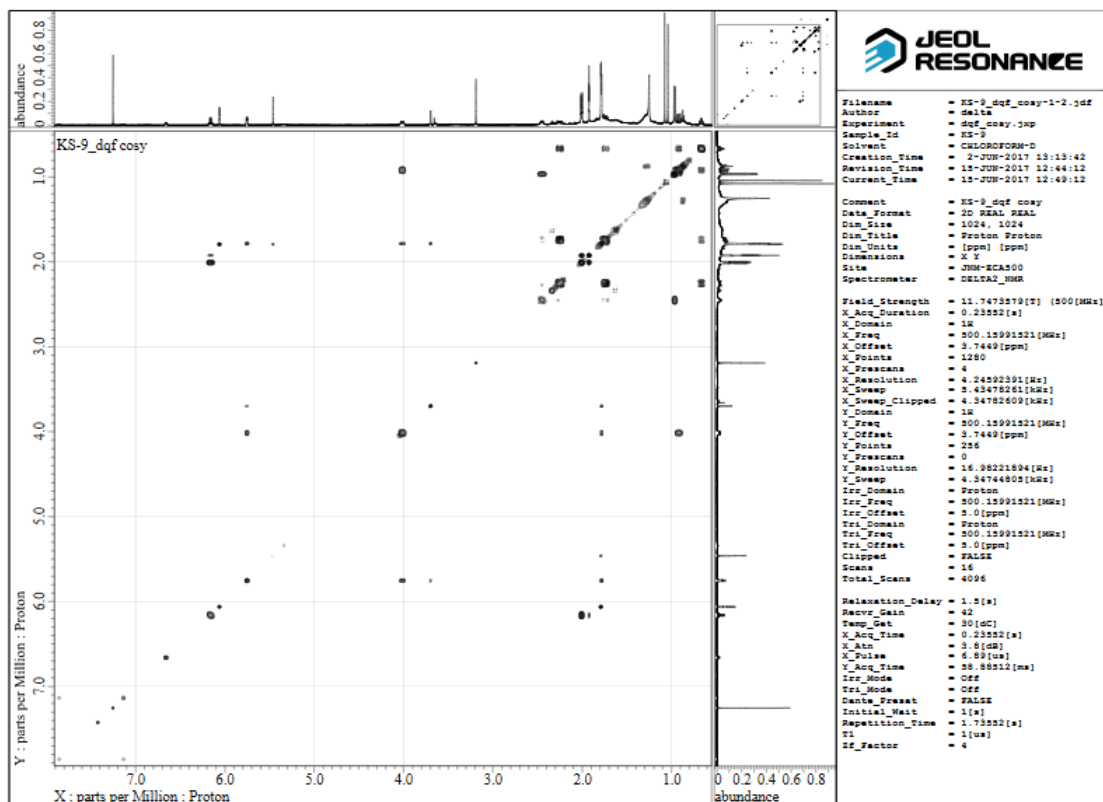

The DQF-COSY spectrum of compound 17

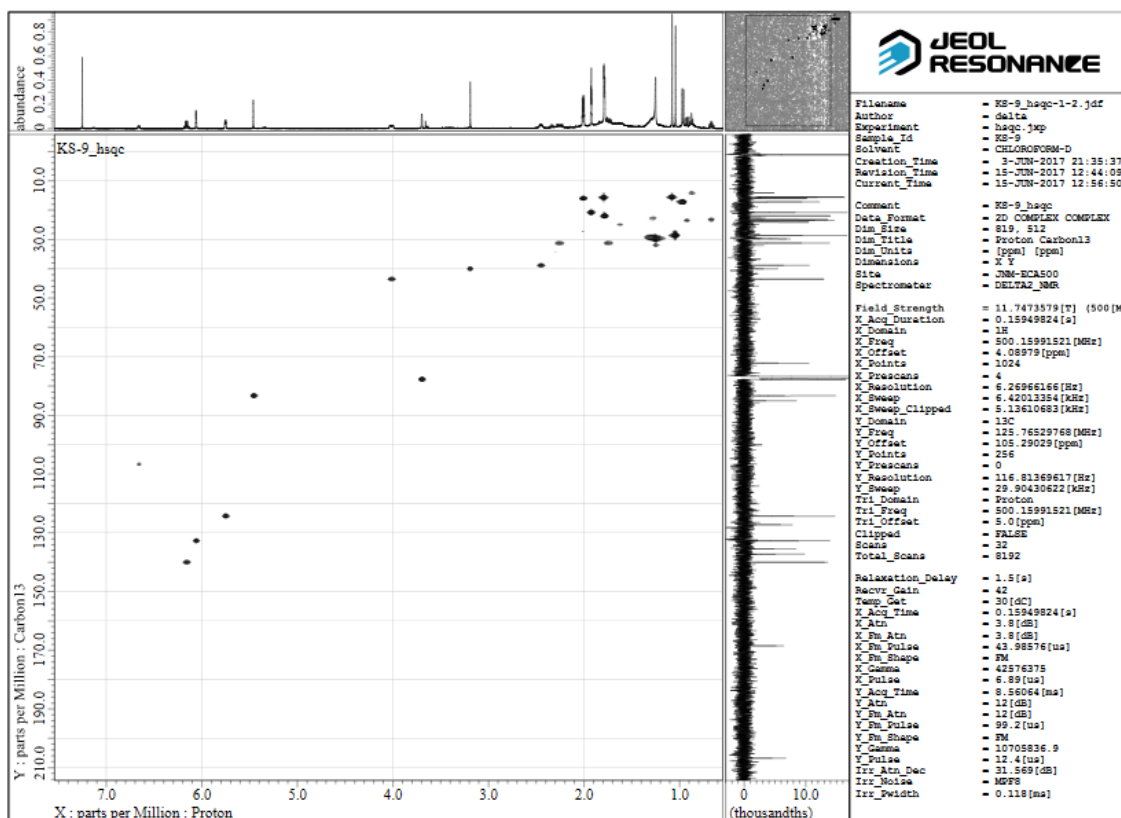

The HSQC spectrum of compound 17

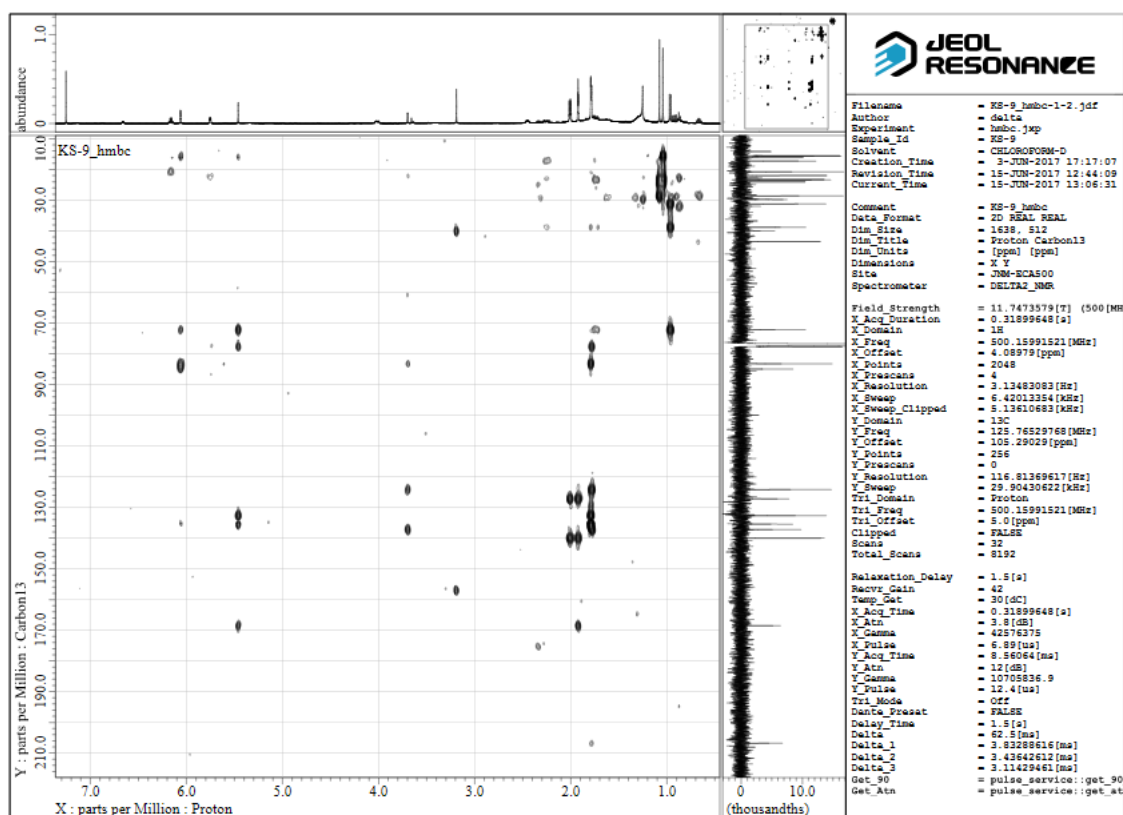

The HMBC spectrum of compound 17

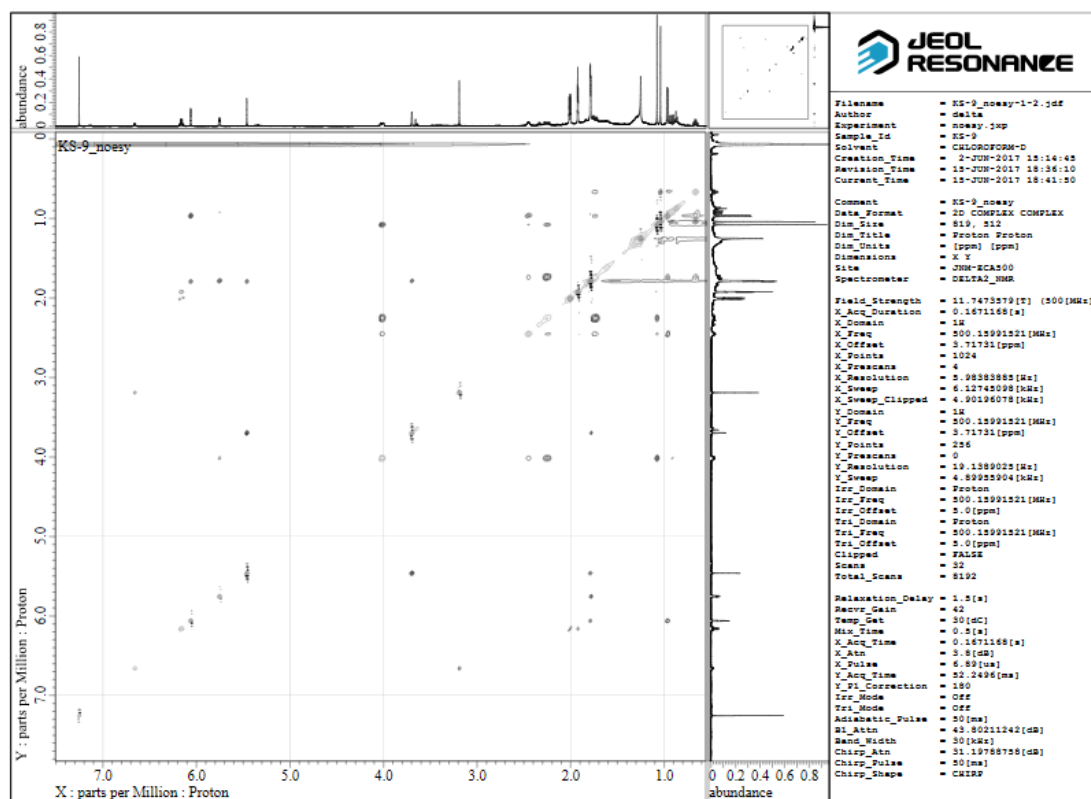

The NOESY spectrum of compound 17

測定データ名: KS-11  
 作成条件: 平均(MS[1]) 経過時間: 0.47-0.65  
 x10<sup>3</sup> 面積 (25197)

実験日時: 2017/10/13 21:33:15  
 イオン化モード: ESI+

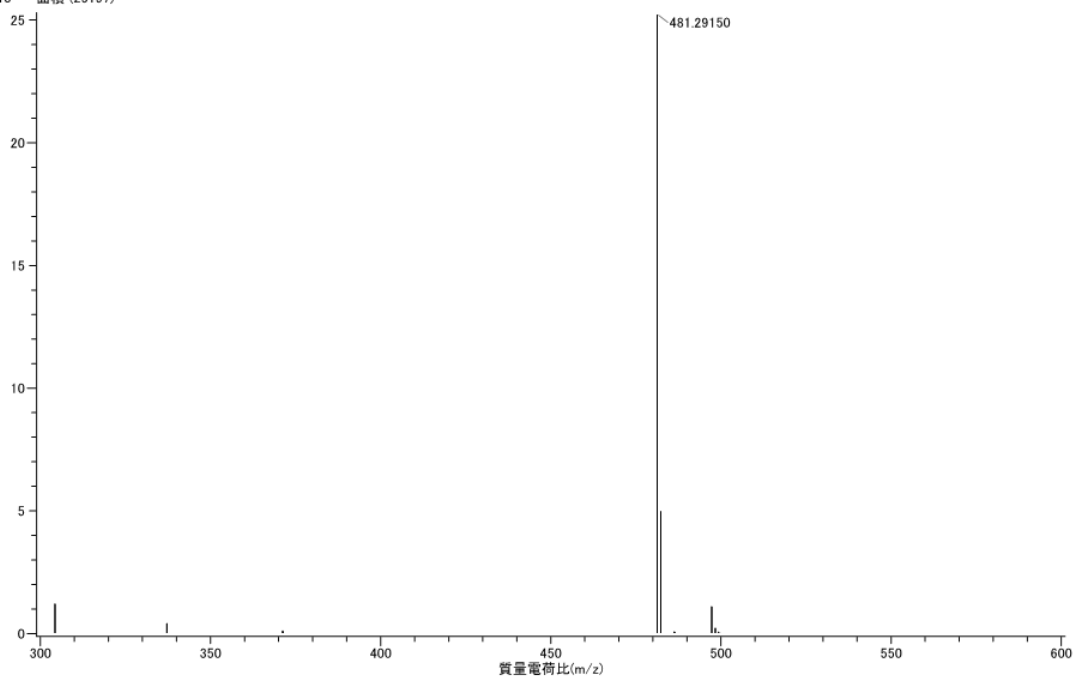

The HRESIMS spectrum of compound 18

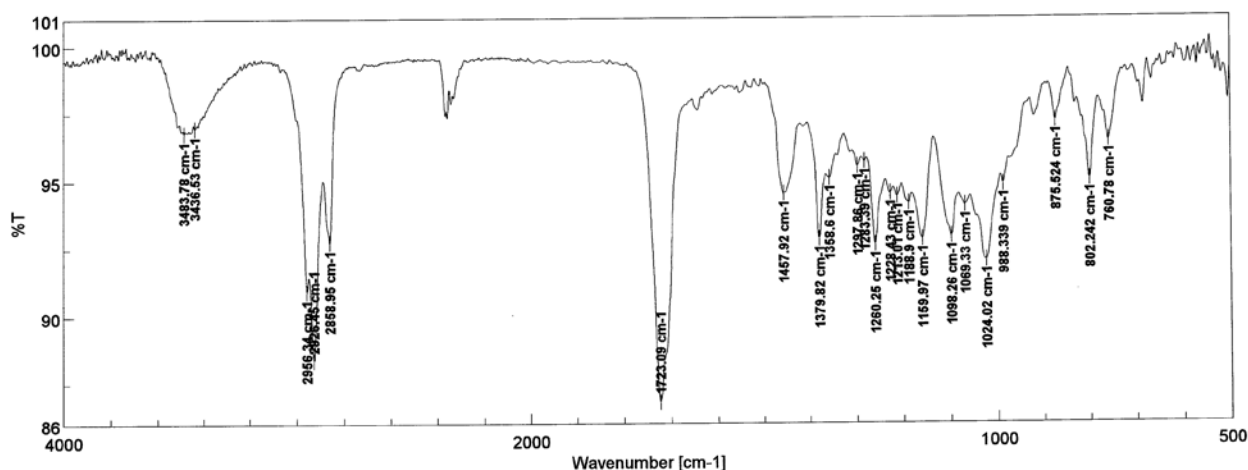

【コメント情報】  
 試料名  
 コメント  
 測定者  
 所属  
 会社

KS-11  
 B  
 東邦大学 薬学部

【データ情報】  
 作成日時  
 データタイプ  
 横軸  
 縦軸  
 スタート  
 エンド  
 データ間隔  
 データ数

2017/07/26 15:01  
 等間隔データ  
 Wavenumber [cm-1]  
 %T  
 0 cm-1  
 7800.65 cm-1  
 0.964233 cm-1  
 8091

【測定情報】  
 機種名  
 シリアル番号

FT/IR-4100typeA  
 B109261016

光源  
 検出器  
 積算回数  
 分解  
 ゼロフリンギ  
 アボタイゼーション  
 ゲイン  
 アパーチャー  
 スキャンスピード  
 フィルタ

標準光源  
 TGS  
 Auto (178)  
 4 cm-1  
 On  
 Cosine  
 Auto (16)  
 Auto (7.1 mm)  
 Auto (2 mm/sec)  
 Auto (30000 Hz)

Memory-2

The IR spectrum of compound 18

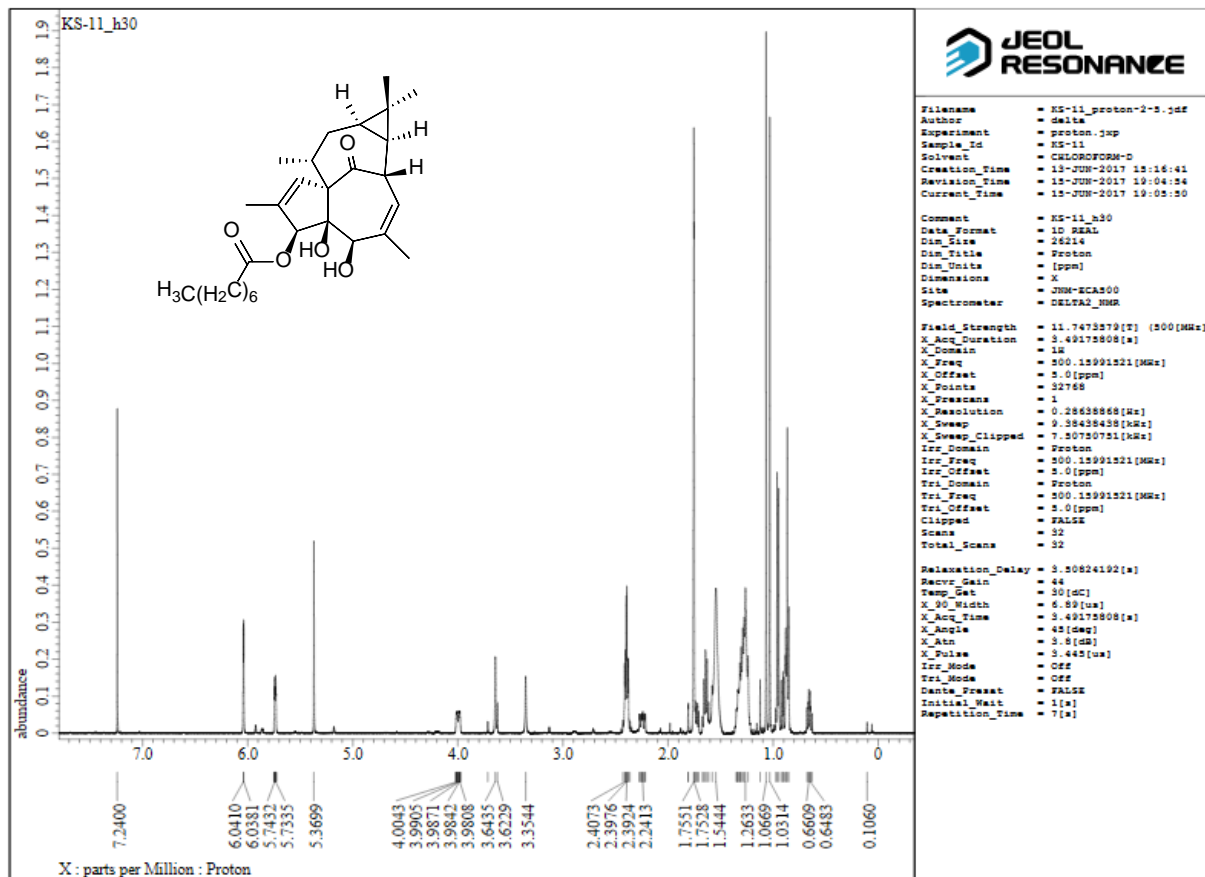

The <sup>1</sup>H spectrum of compound 18



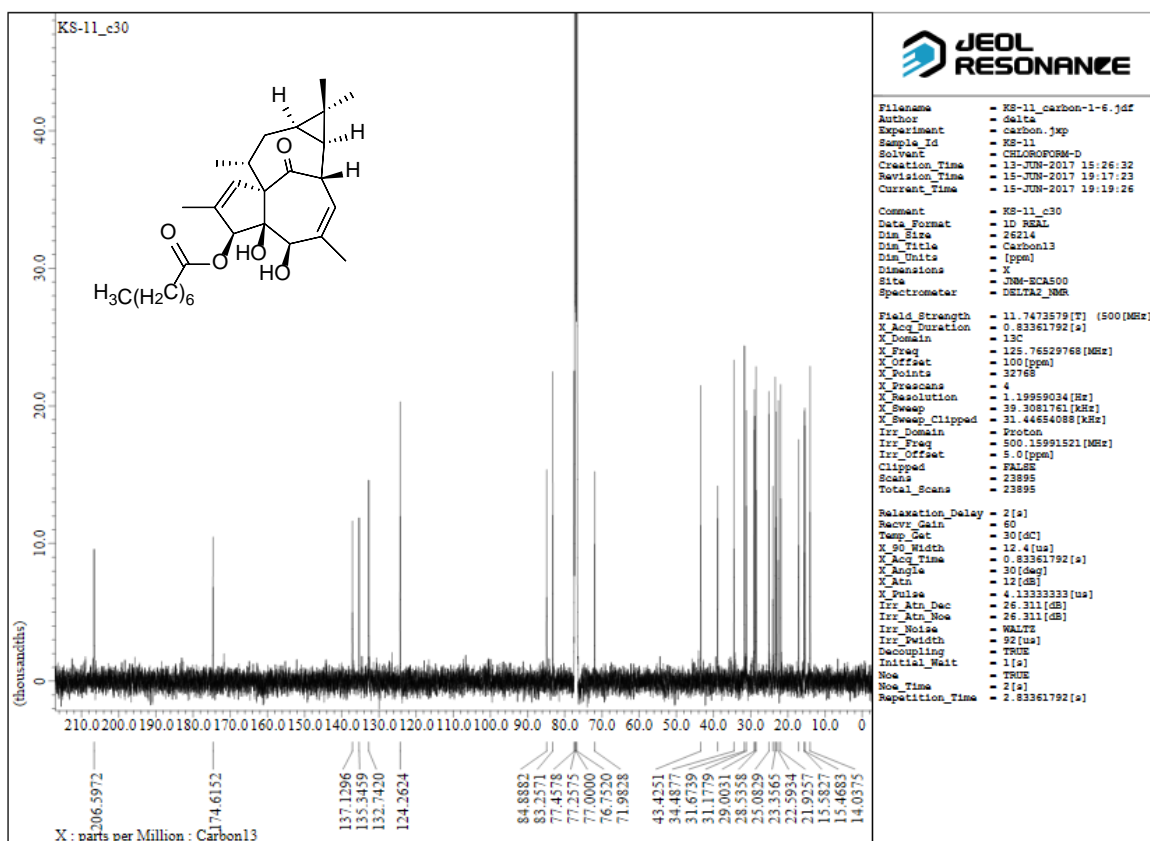

The  $^{13}\text{C}$  spectrum of compound 18

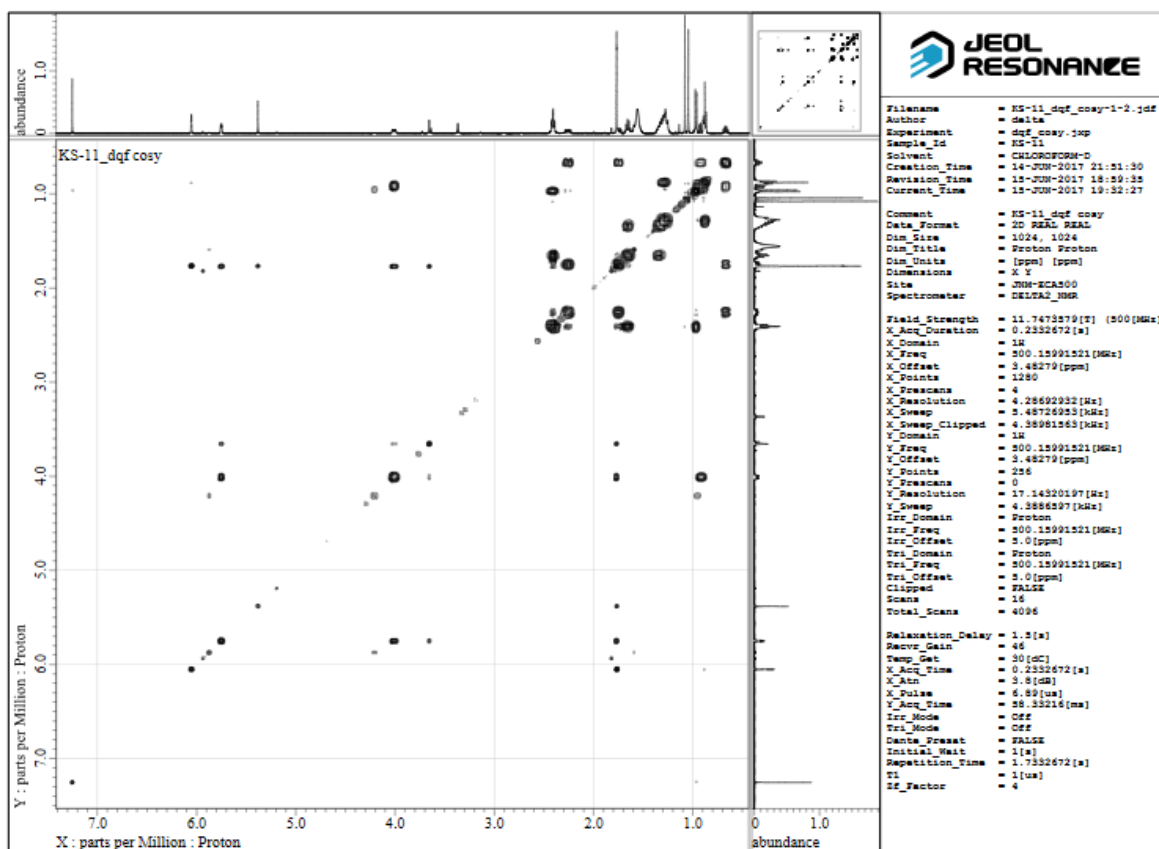

The DQF-COSY spectrum of compound 18



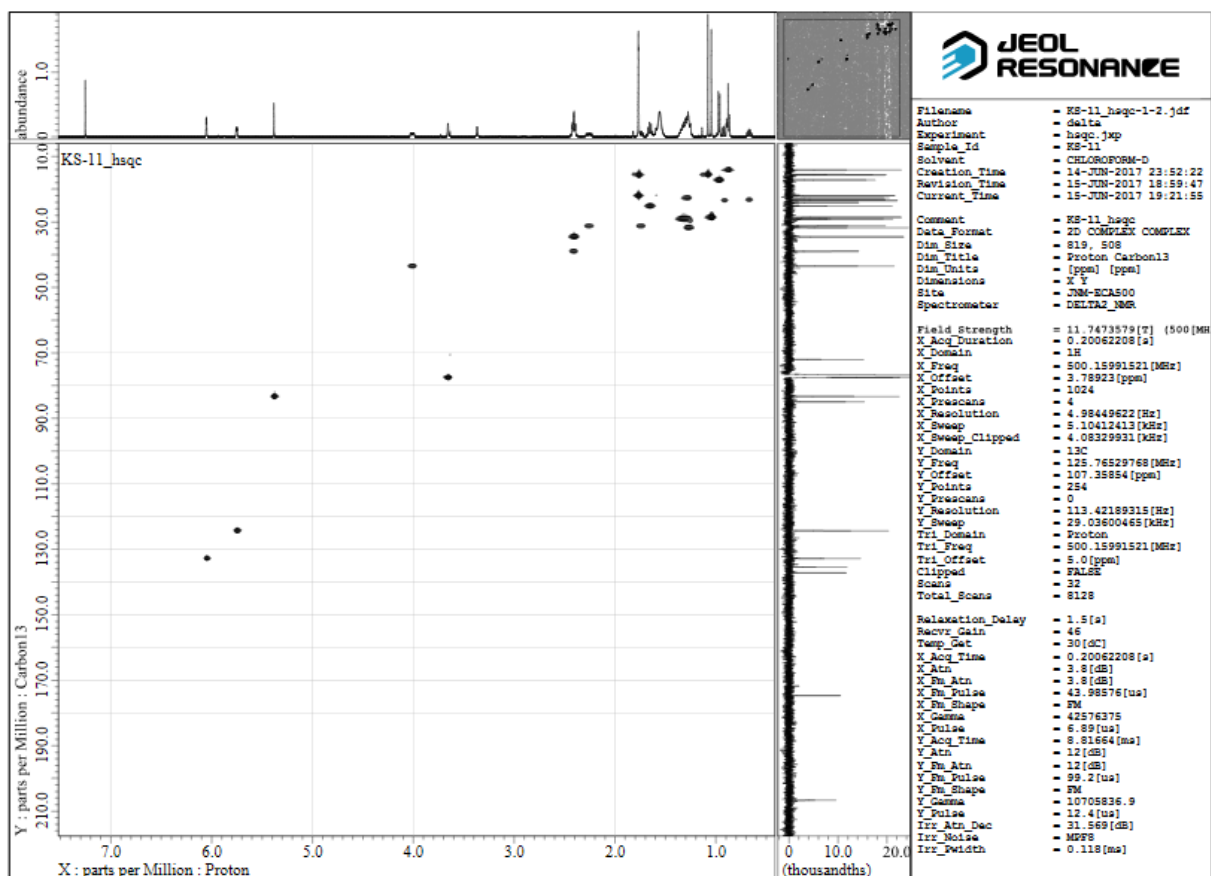

The HSQC spectrum of compound 18

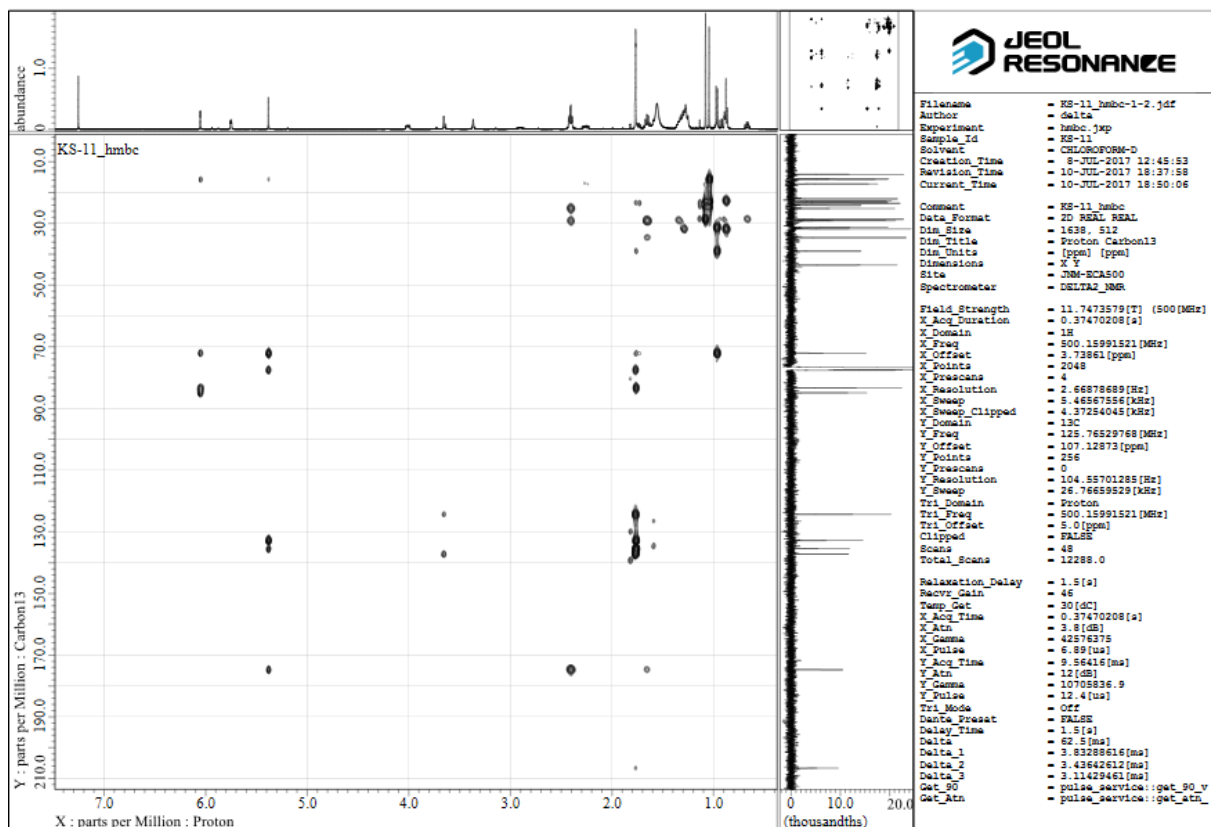

The HMBC spectrum of compound 18

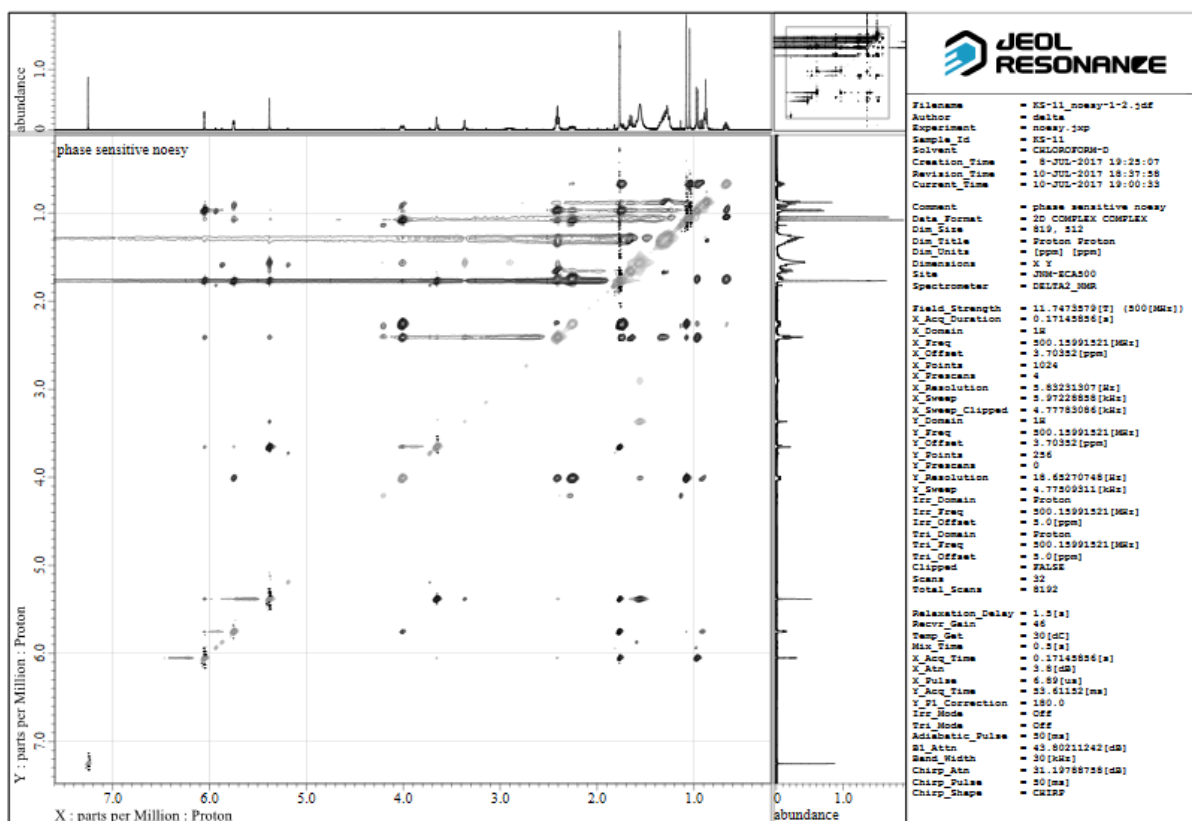

The NOESY spectrum of compound 18

測定データ名: KS-12.02  
 作成条件: 平均(MS[1] 経過時間: 0.76..1.03)  
 x10<sup>3</sup> 面積 (12139)

実験日時: 2017/10/13 22:37:12  
 イオン化モード: ESI+

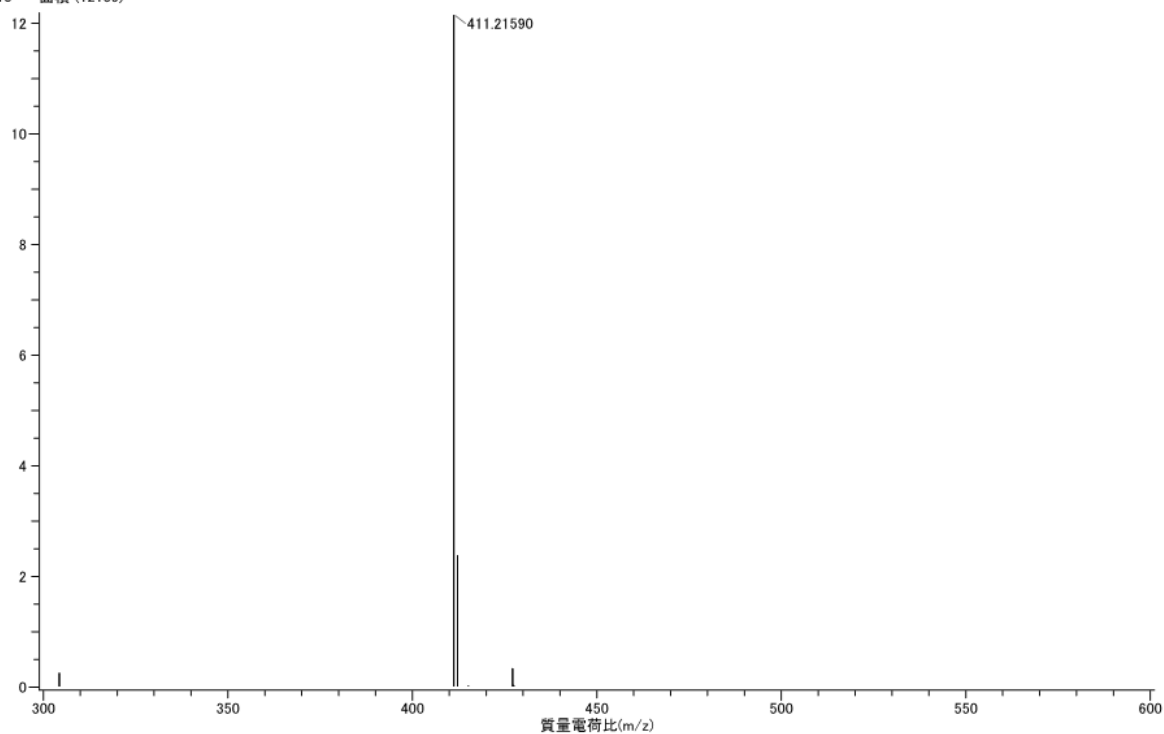

The HRMS spectrum of compound 19

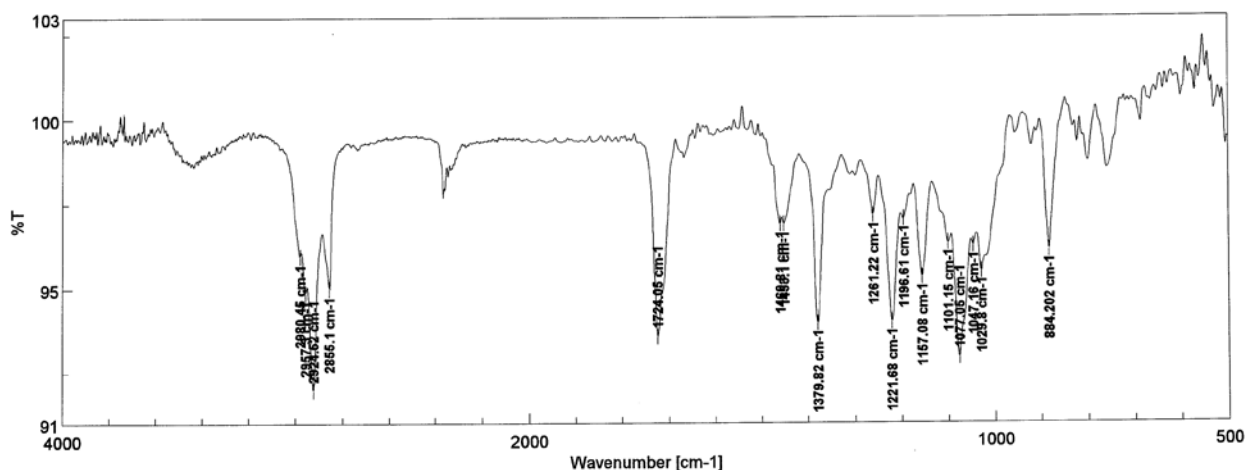

[コメント情報]  
 試料名 KS-12  
 コメント  
 測定者 B  
 所属 東邦大学 薬学部  
 会社

[データ情報]  
 作成日時 2017/07/26 15:14  
 データタイプ 等間隔データ  
 横軸 Wavenumber [cm-1]  
 縦軸 %T  
 スタート 0 cm-1  
 エンド 7800.65 cm-1  
 データ間隔 0.964233 cm-1  
 データ数 8091

[測定情報]  
 機種名 FT/IR-4100typeA  
 シリアル番号 B109261016

光源 標準光源  
 検出器 TGS  
 積算回数 Auto (190)  
 分解 4 cm-1  
 ゼロフリング On  
 アボタイゼーション Cosine  
 ゲイン Auto (16)  
 アパーチャー Auto (7.1 mm)  
 スキャンスピード Auto (2 mm/sec)  
 フィルタ Auto (30000 Hz)

Memory-2

The IR spectrum of compound 19

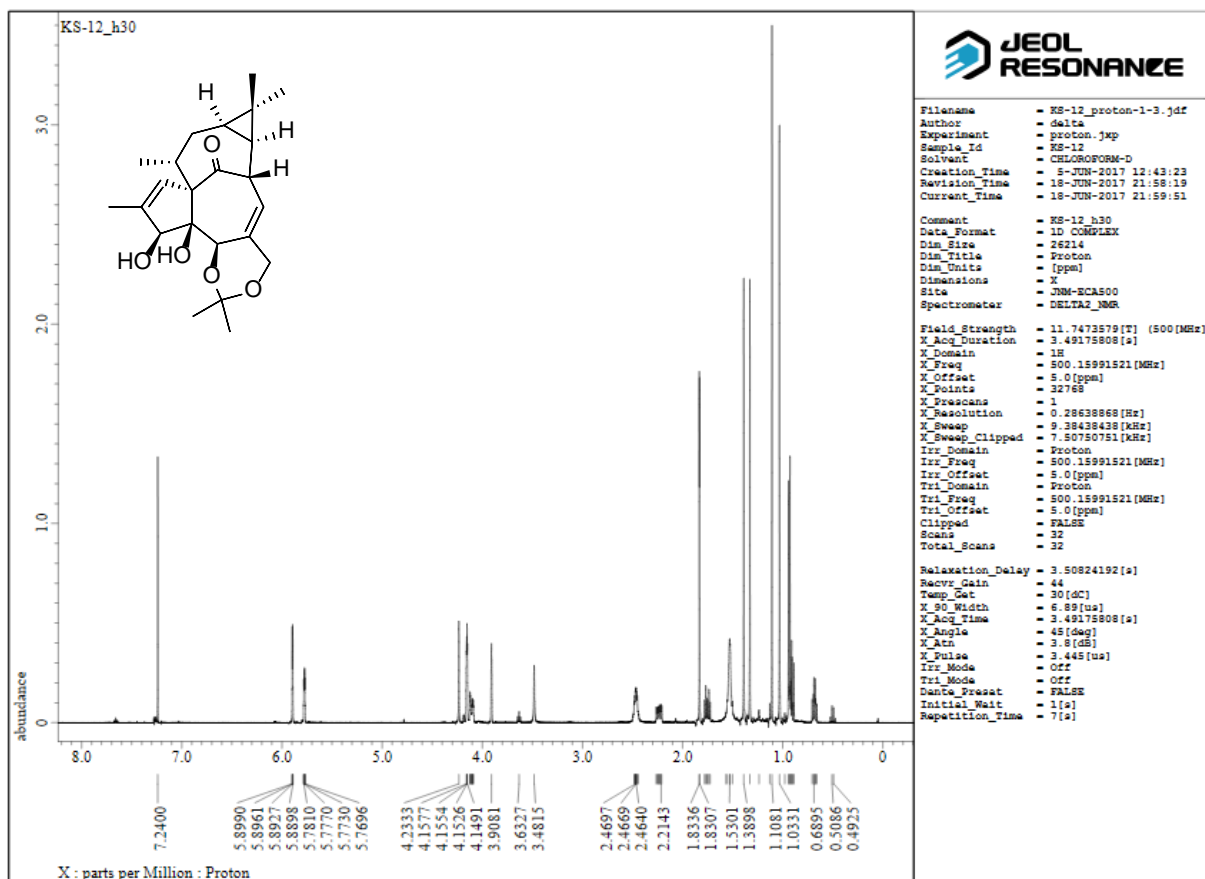

The  $^1\text{H}$  spectrum of compound 19

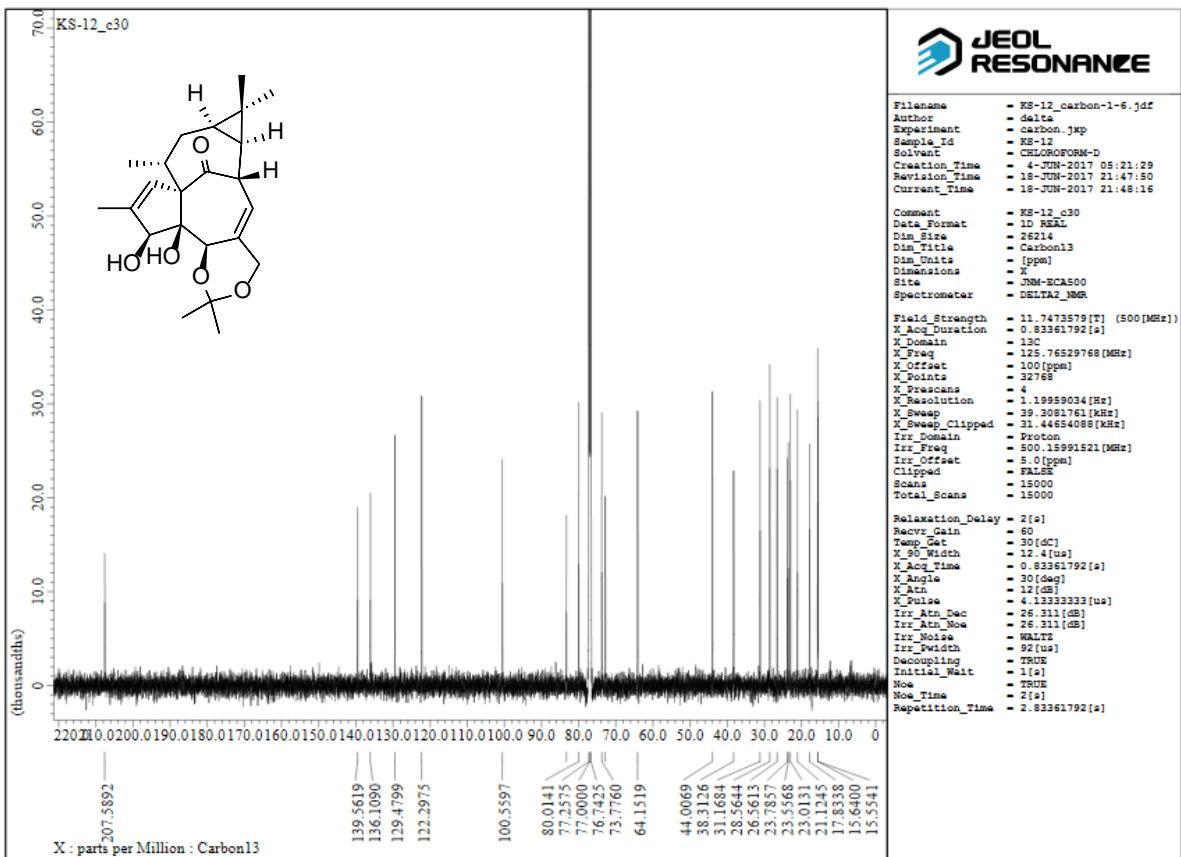

The <sup>13</sup>C spectrum of compound 19

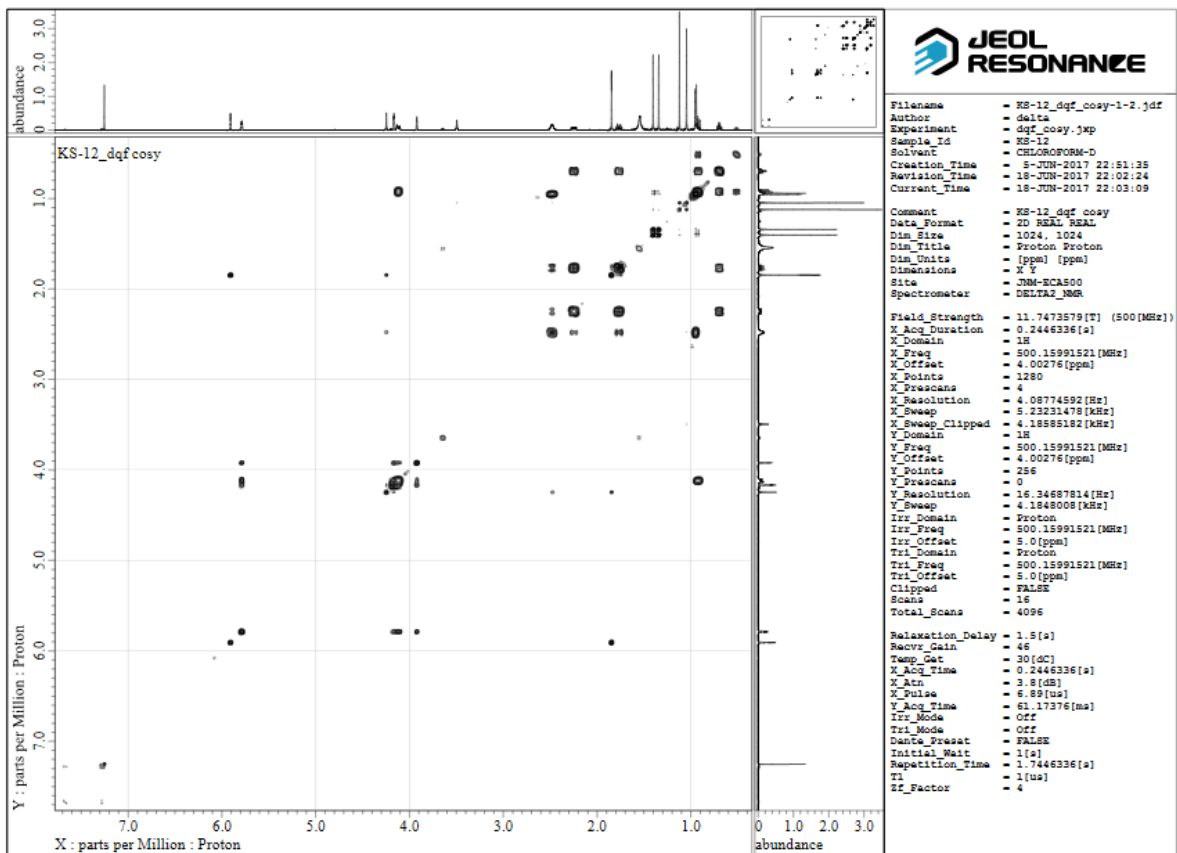

The DQF-COSY spectrum of compound 19

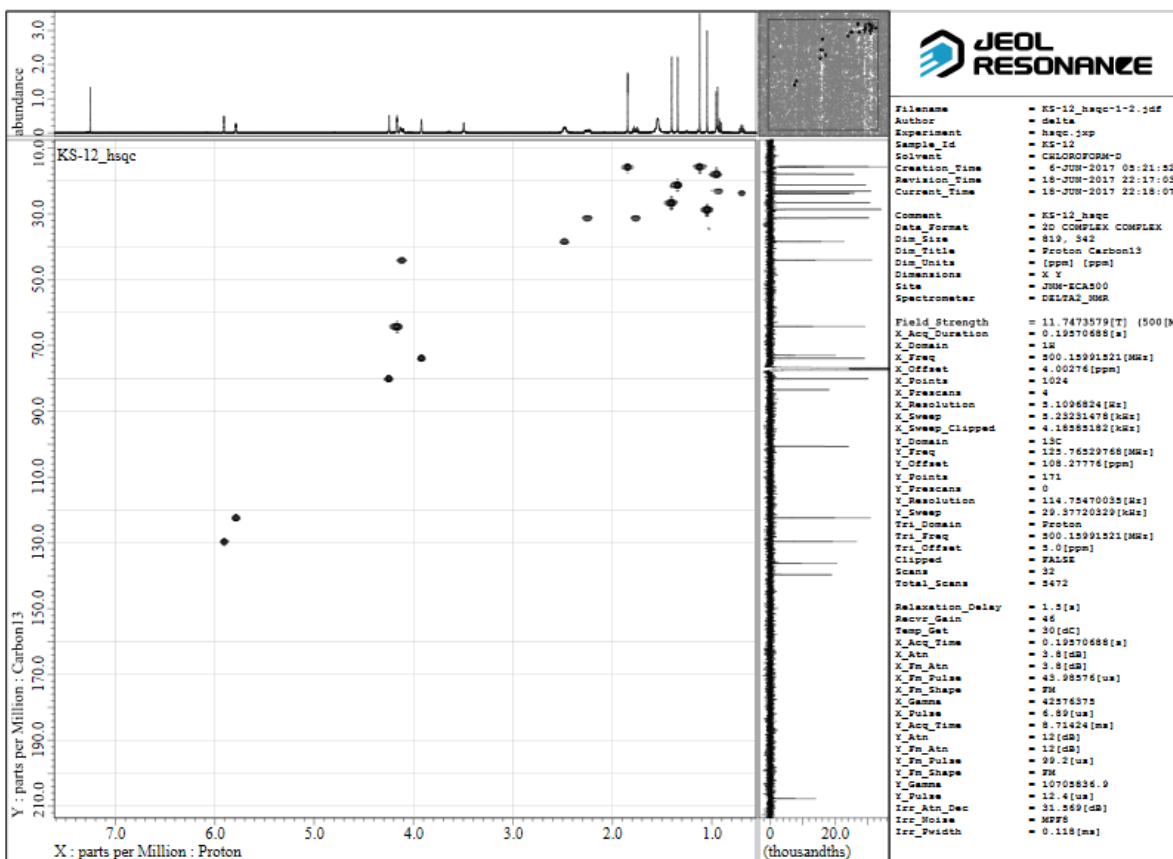

The HSQC spectrum of compound 19

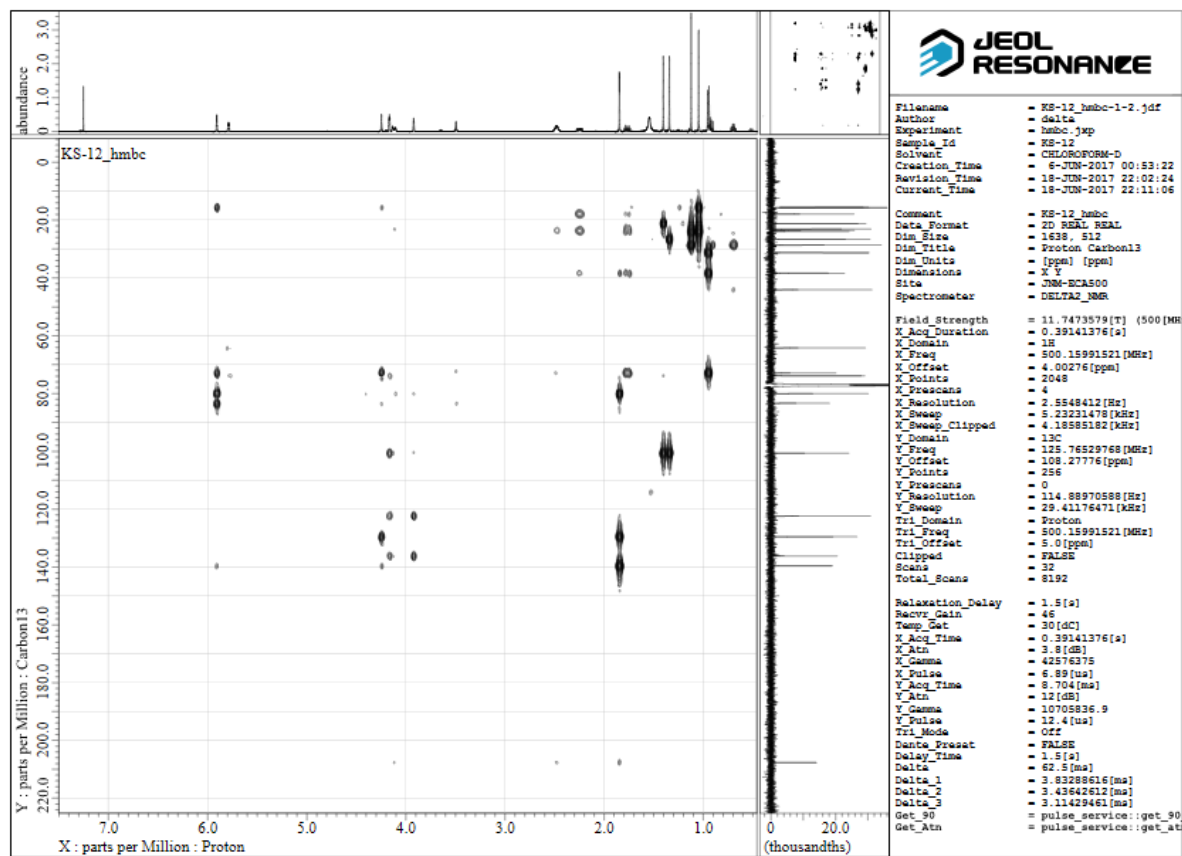

The HMBC spectrum of compound 19

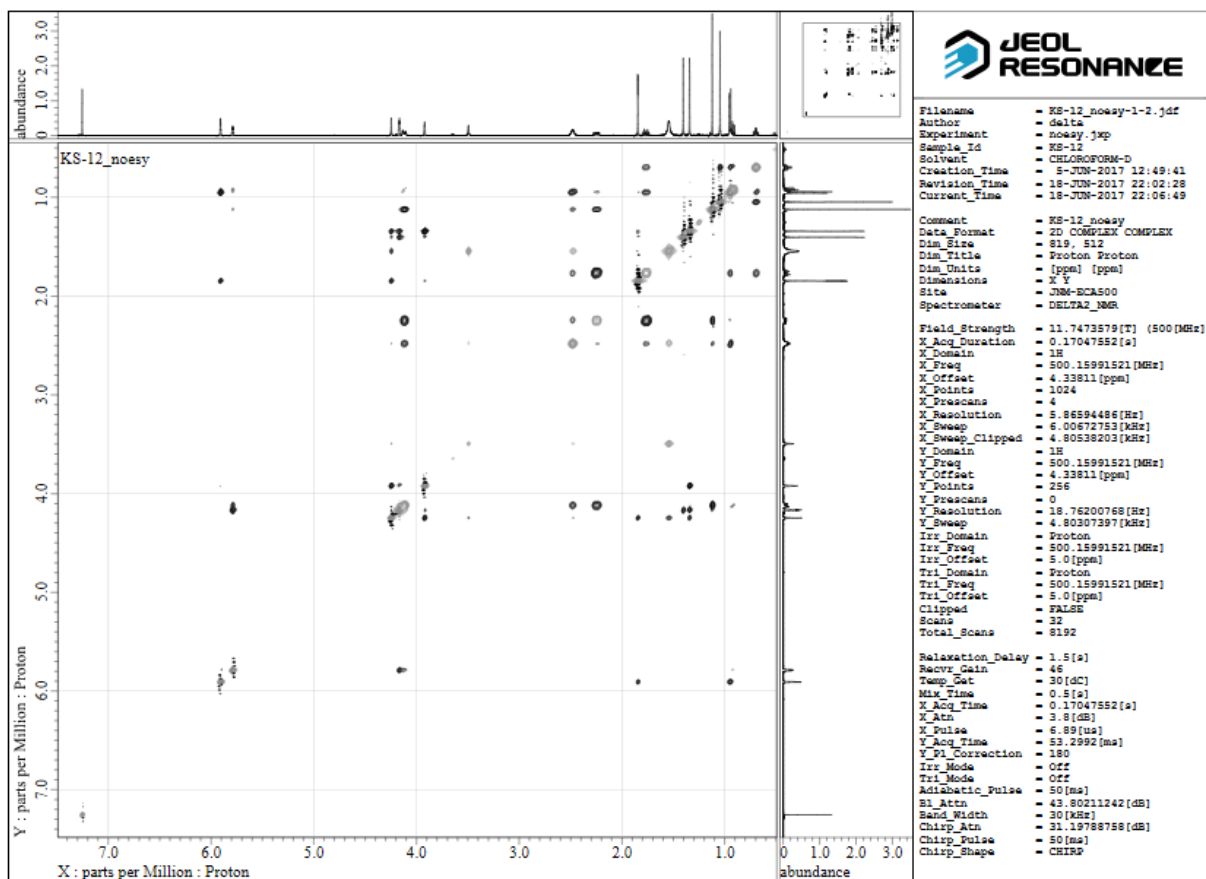

The NOESY spectrum of compound 19

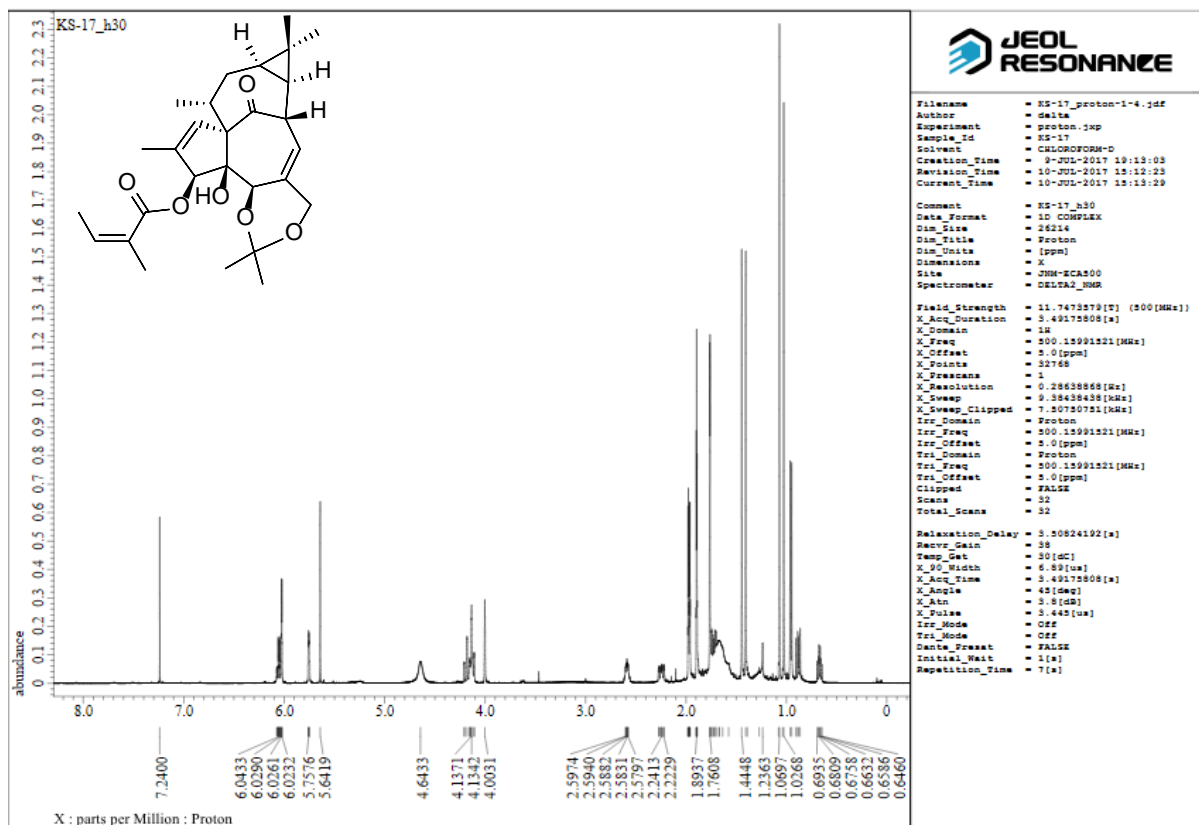

The  $^1\text{H}$  spectrum of compound 20



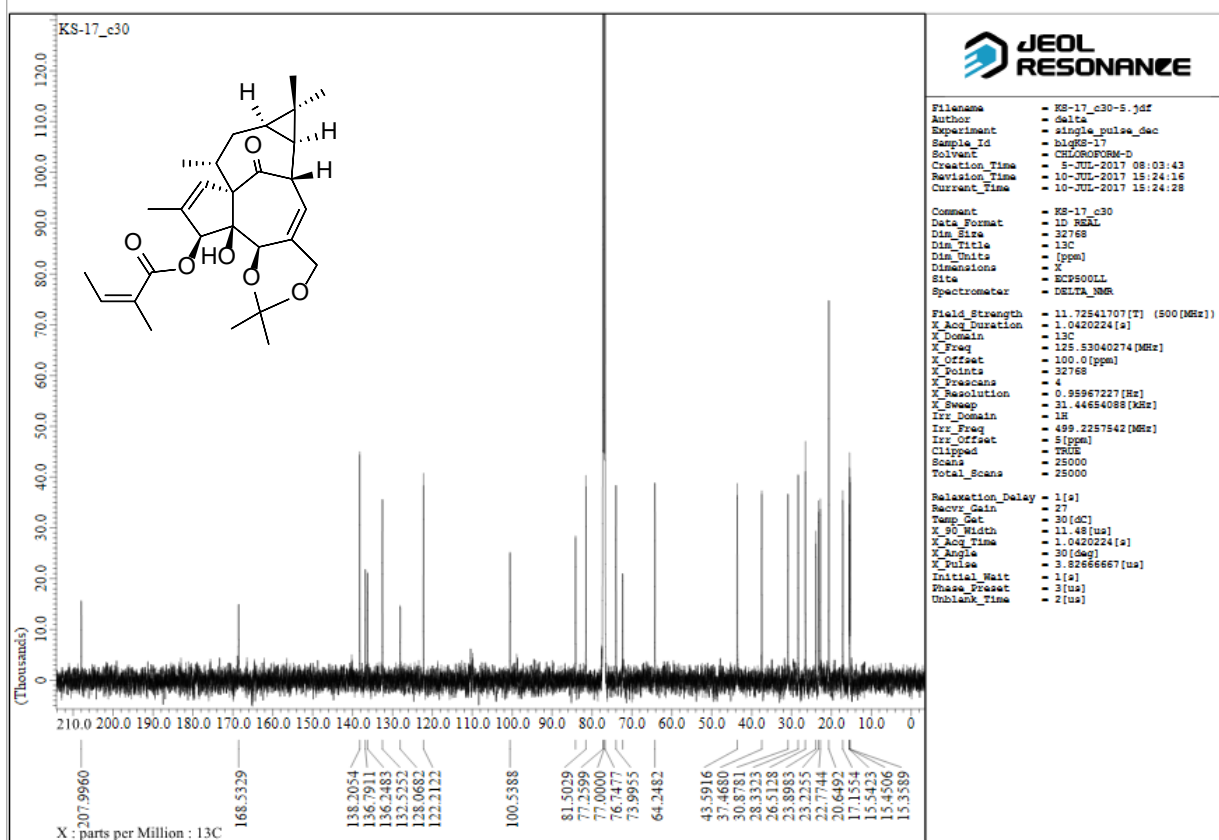

The  $^{13}\text{C}$  spectrum of compound 20

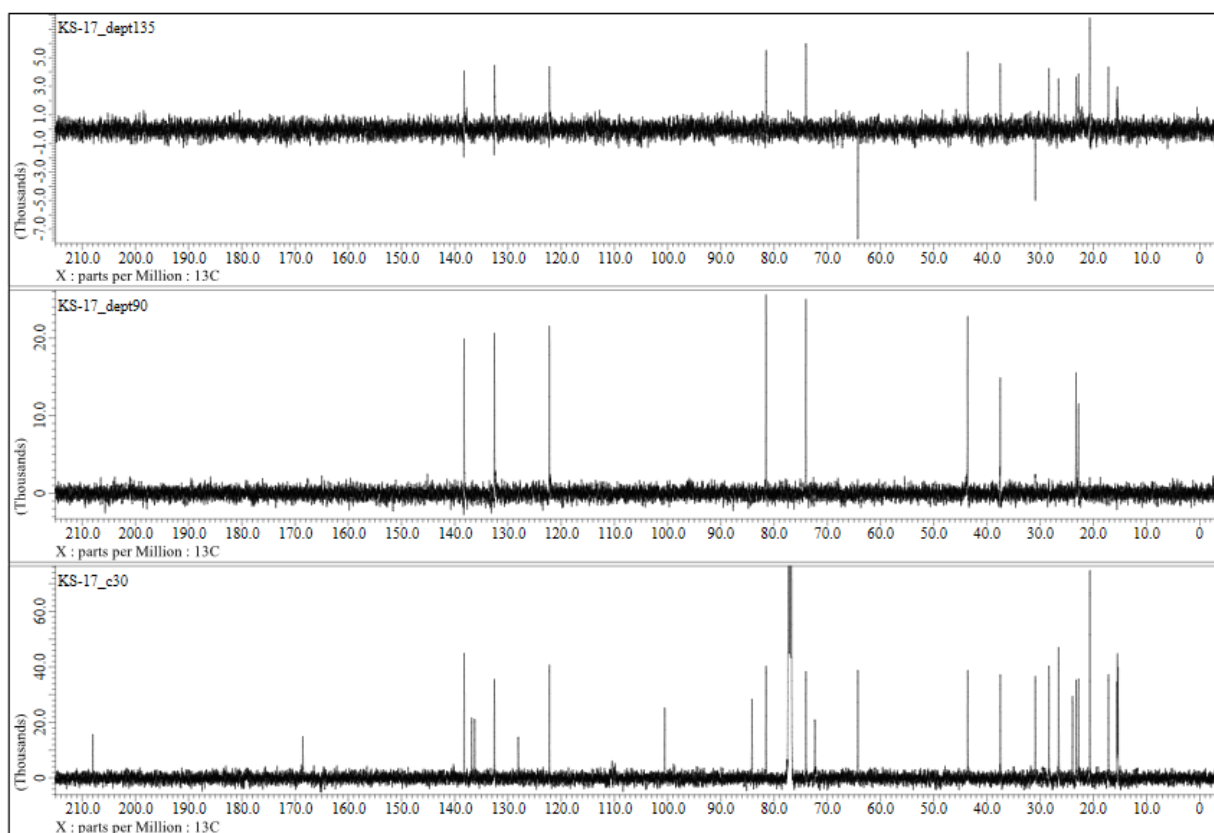

The DEPT spectrum of compound 20

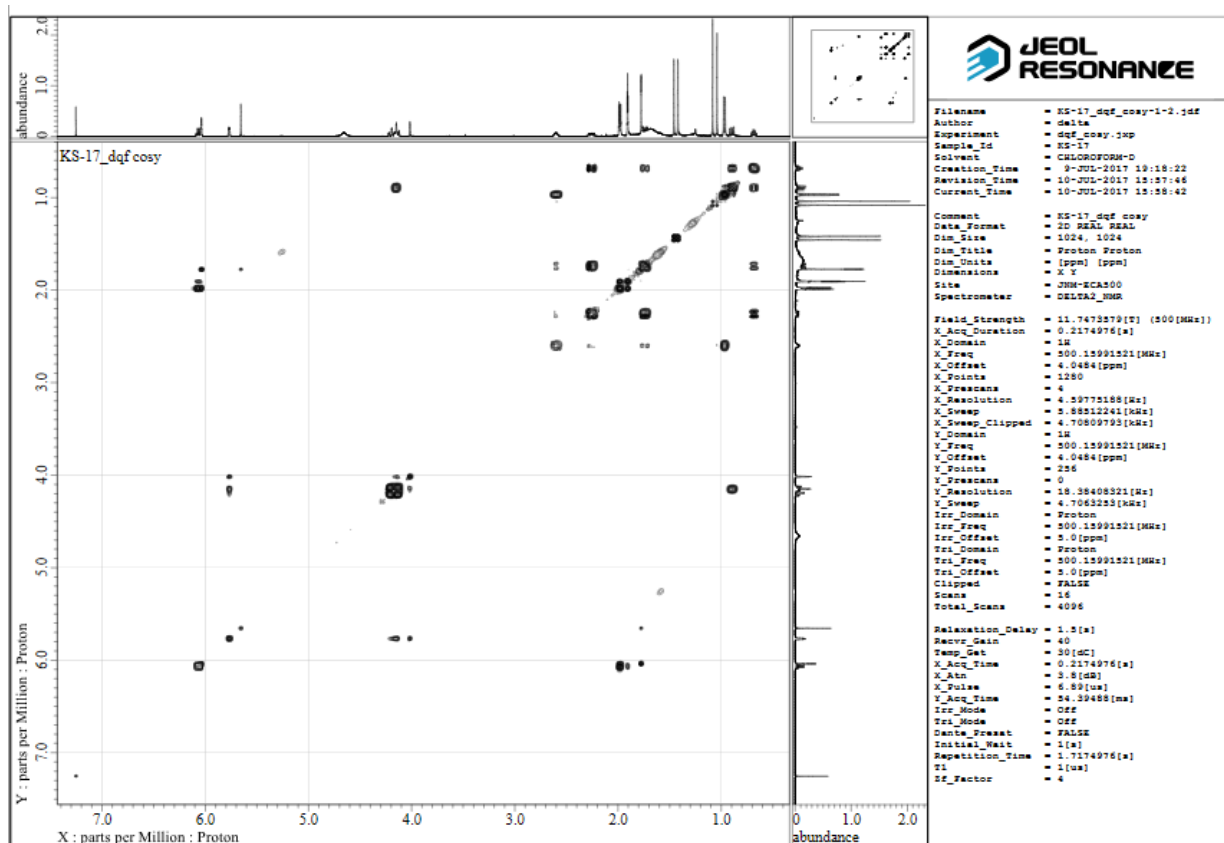

The DQF\_COSY spectrum of compound 20

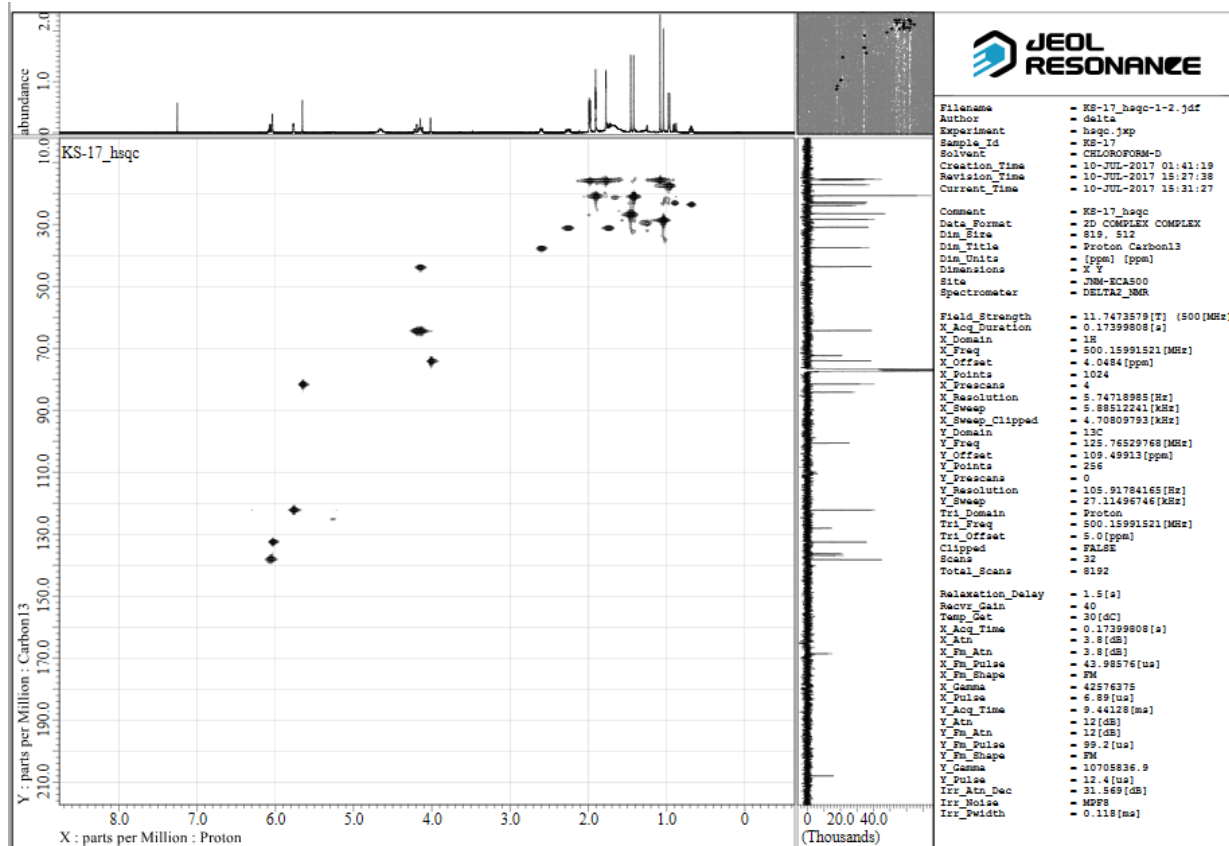

The HSQC spectrum of compound 20



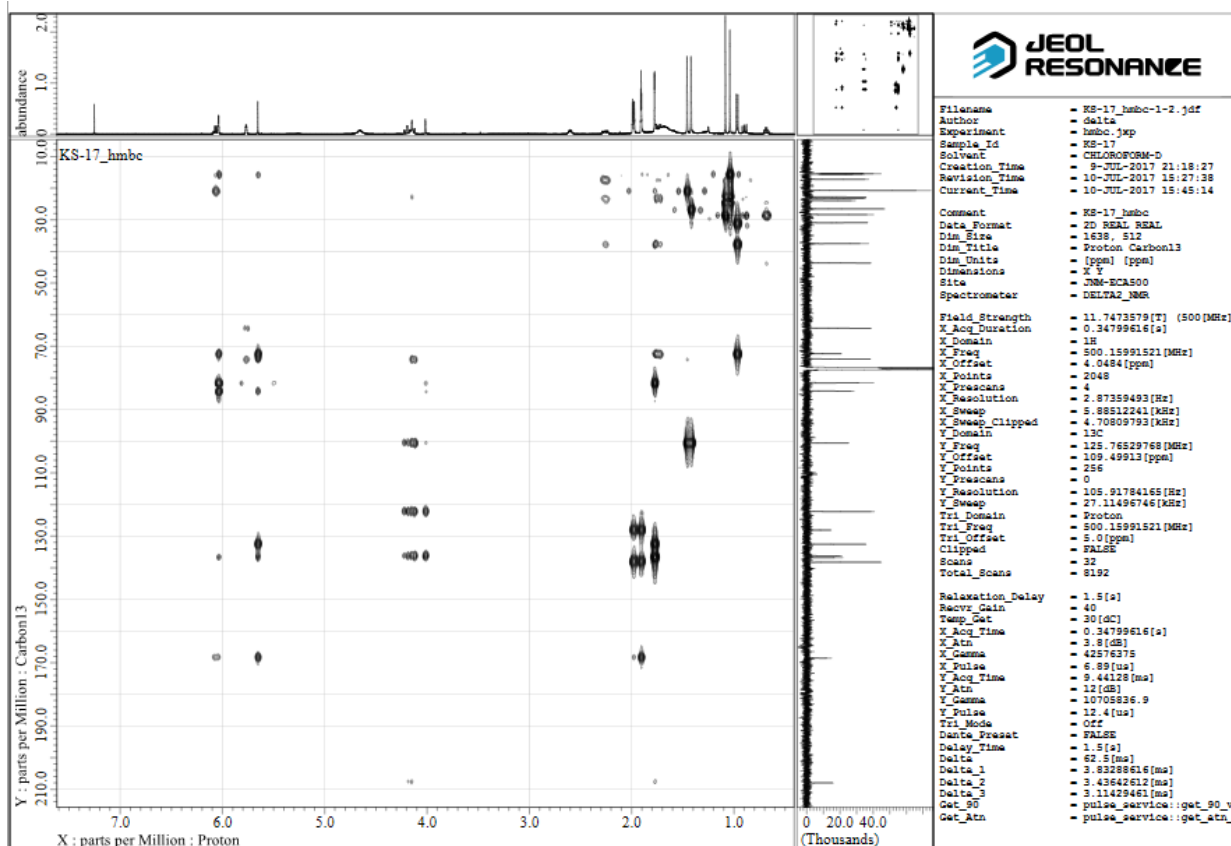

The HMBC spectrum of compound 20

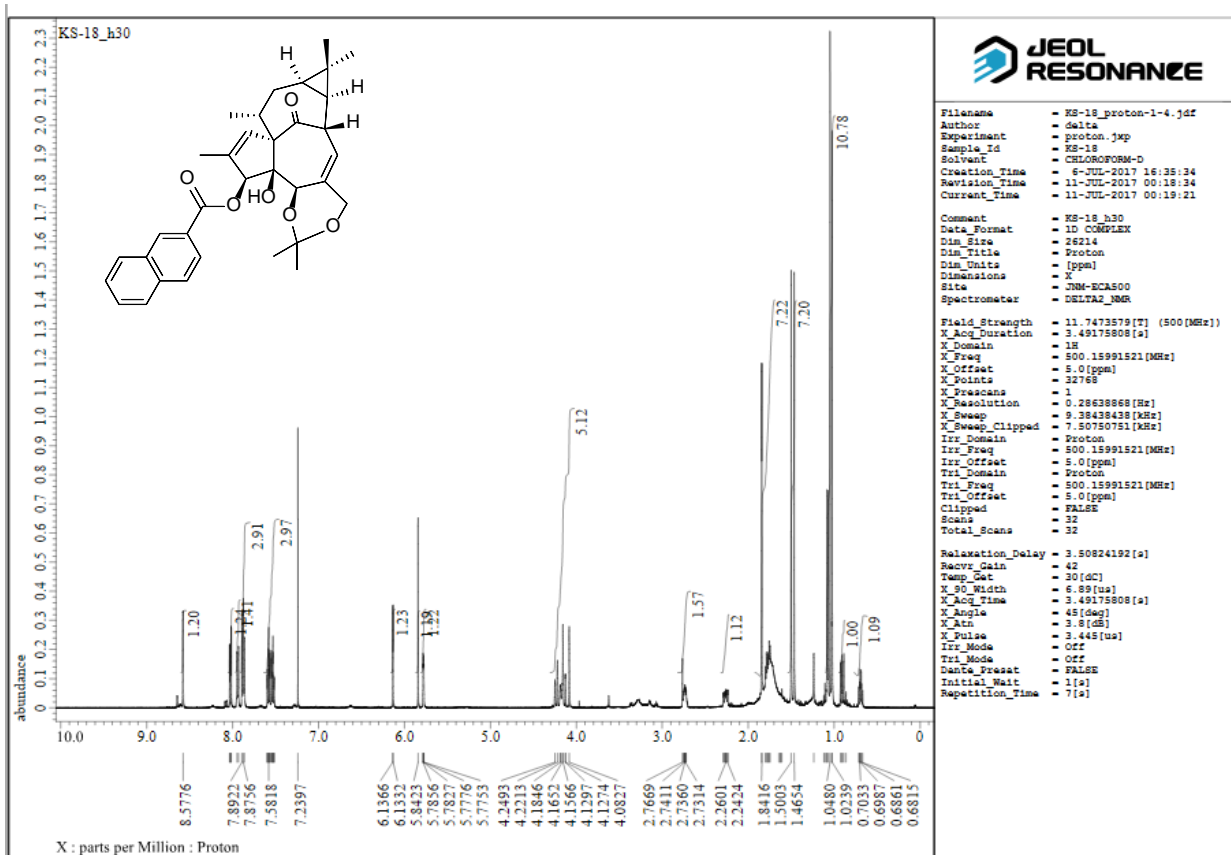

The <sup>1</sup>H spectrum of compound 21

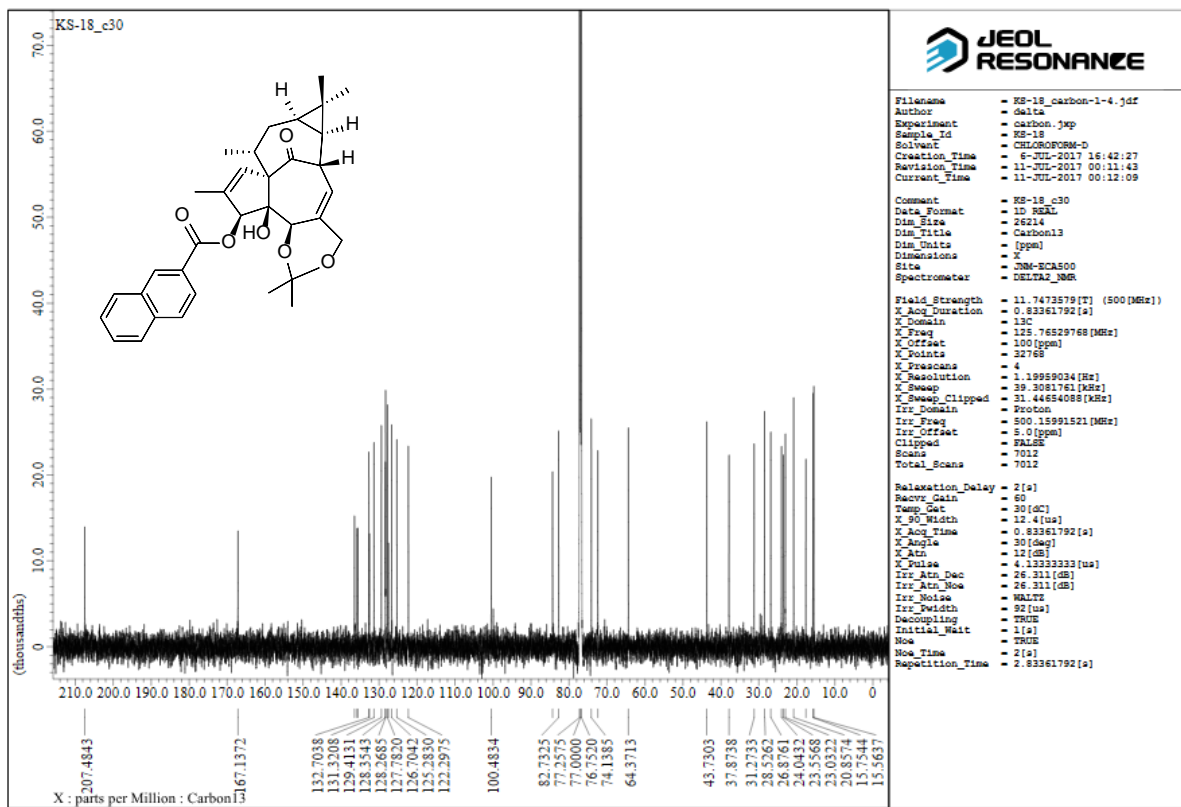

The  $^{13}\text{C}$  spectrum of compound 21

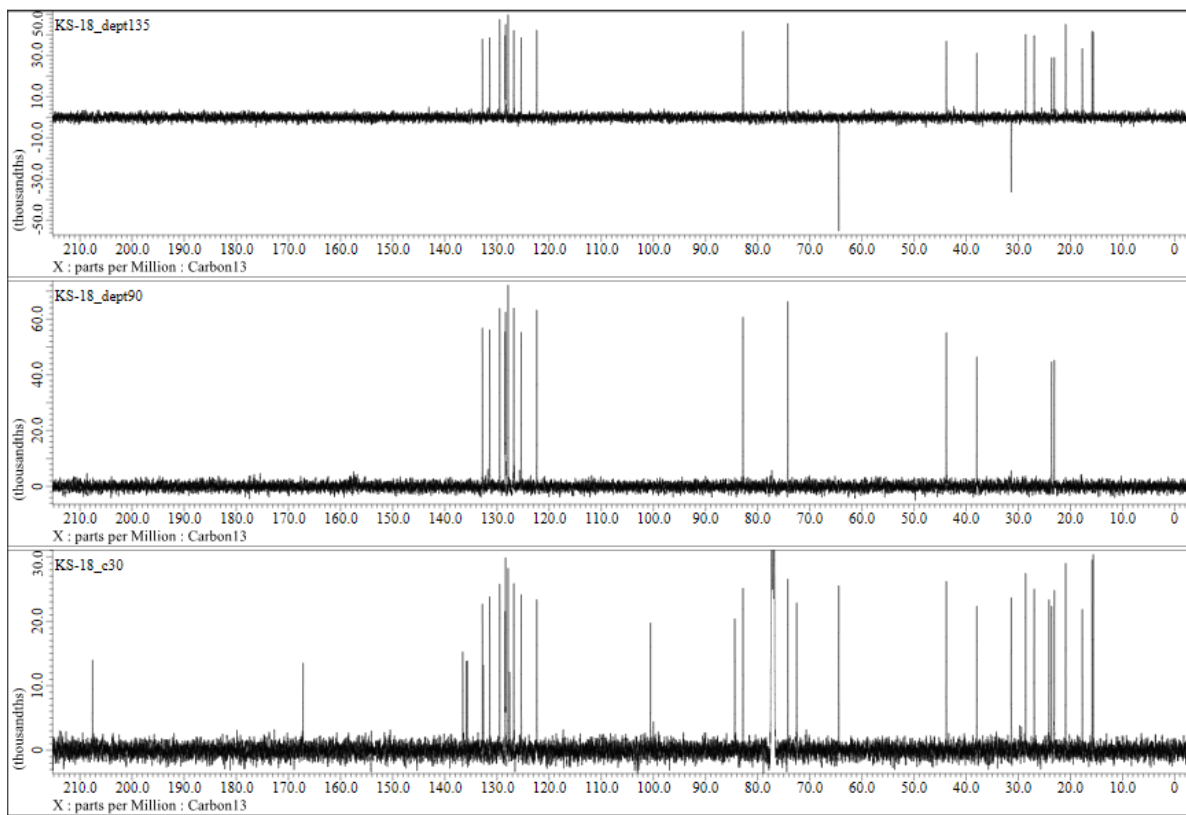

The DEPT spectrum of compound 21

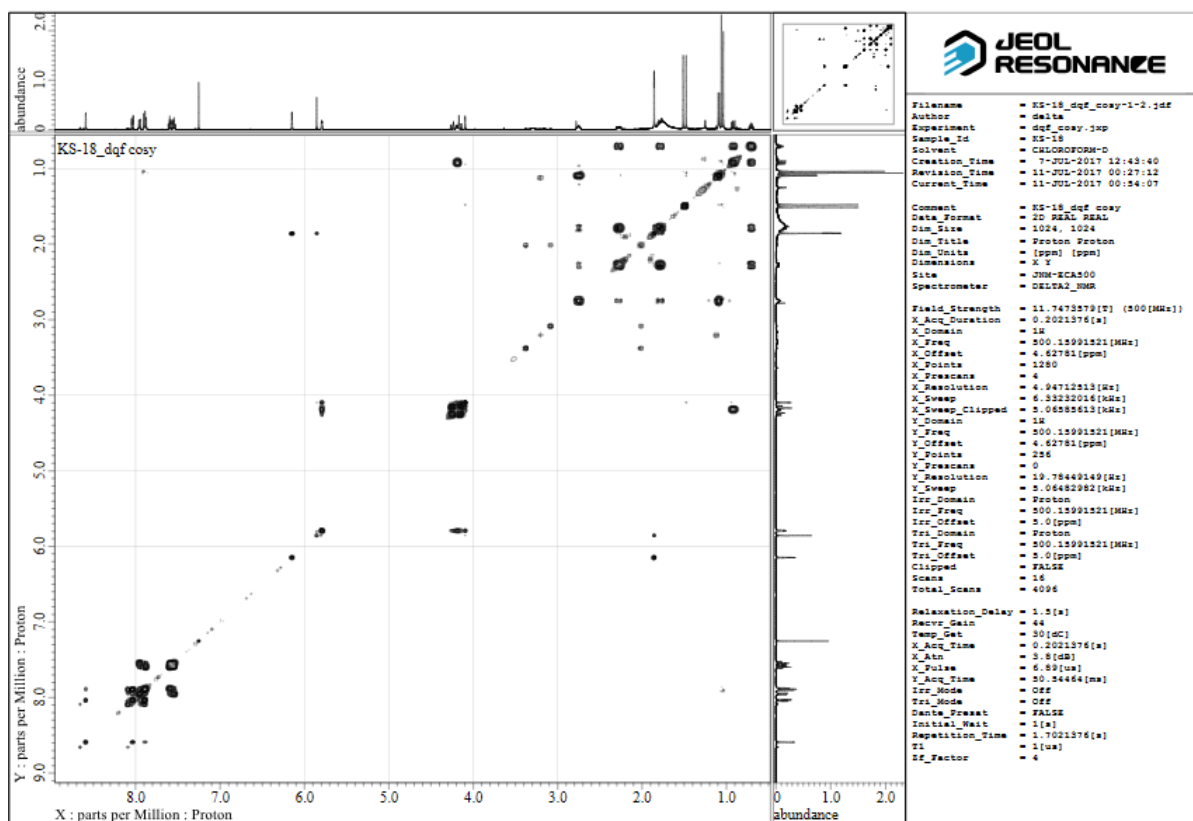

The DQF\_COSY spectrum of compound 21

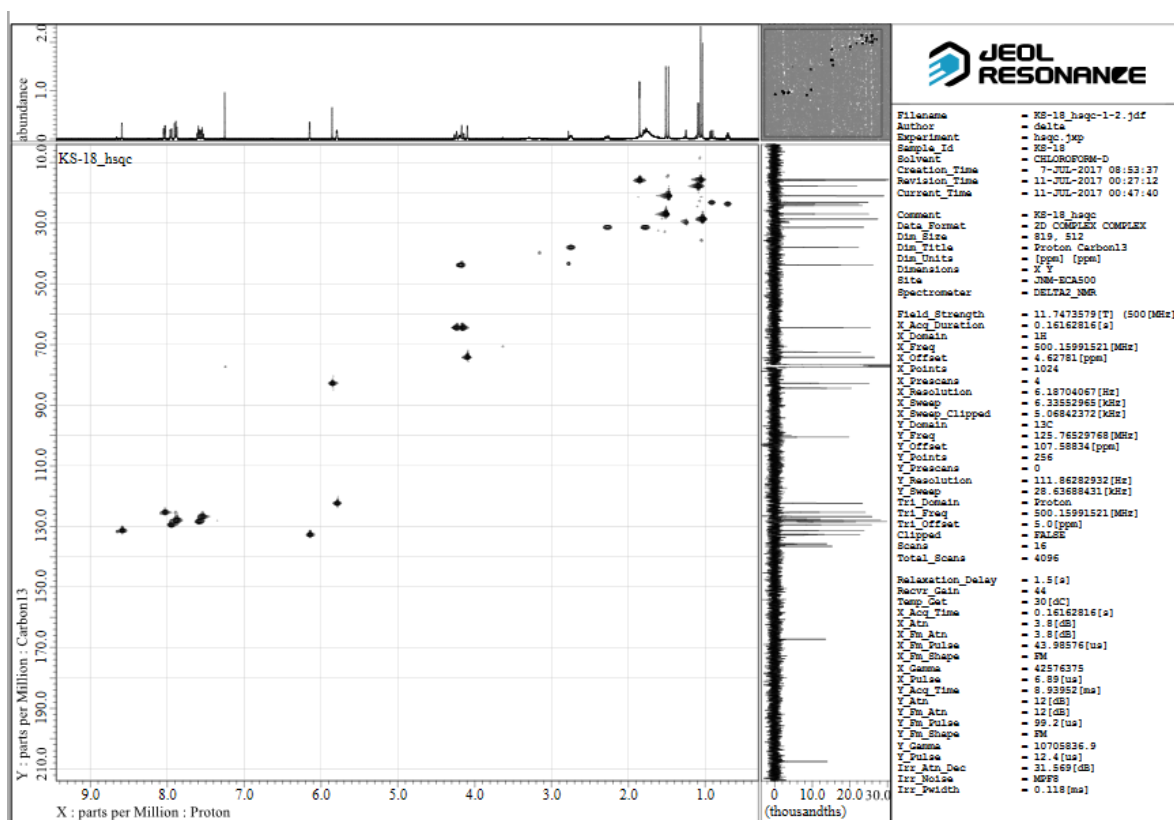

The HSQC spectrum of compound 21

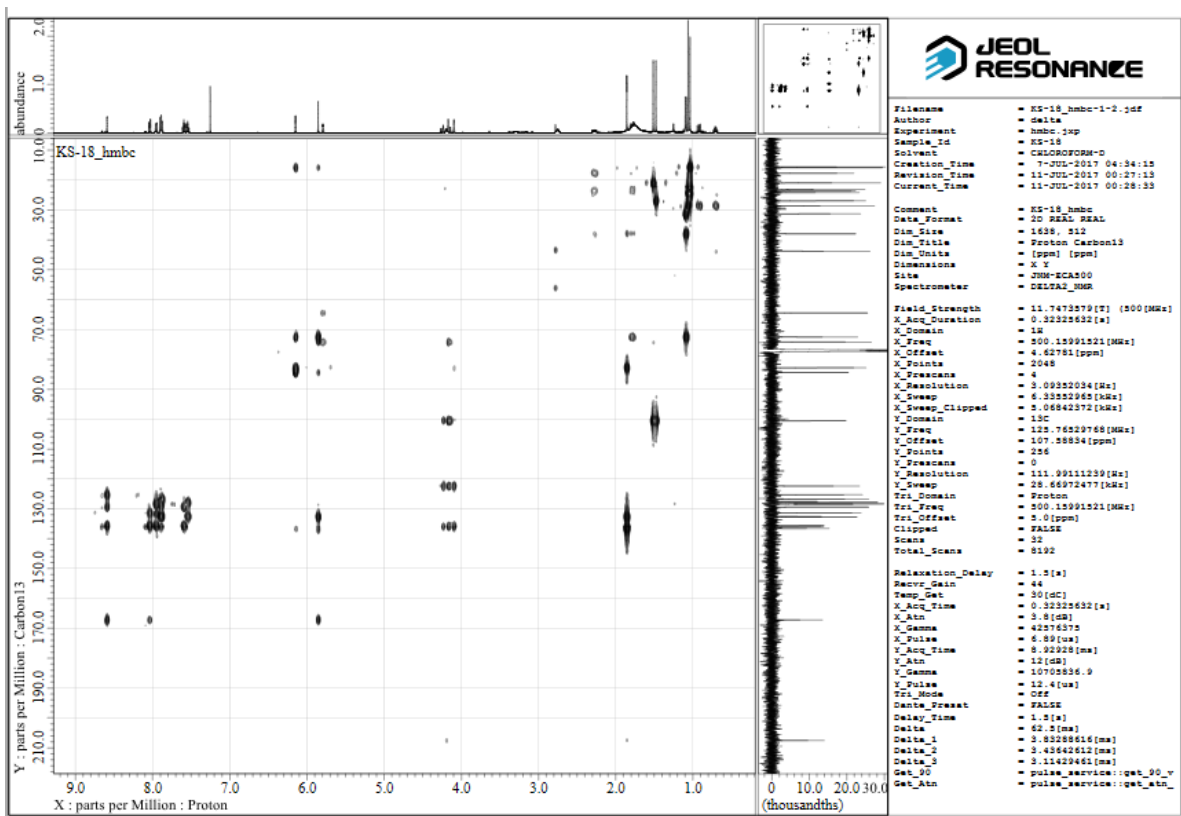

The HMBC spectrum of compound 21

測定データ名: KS-19  
作成条件: 平均(MS[1]) 経過時間: 0.82.0.99

実験日時: 2017/10/13 22:13:47  
イオン化モード: ESI+

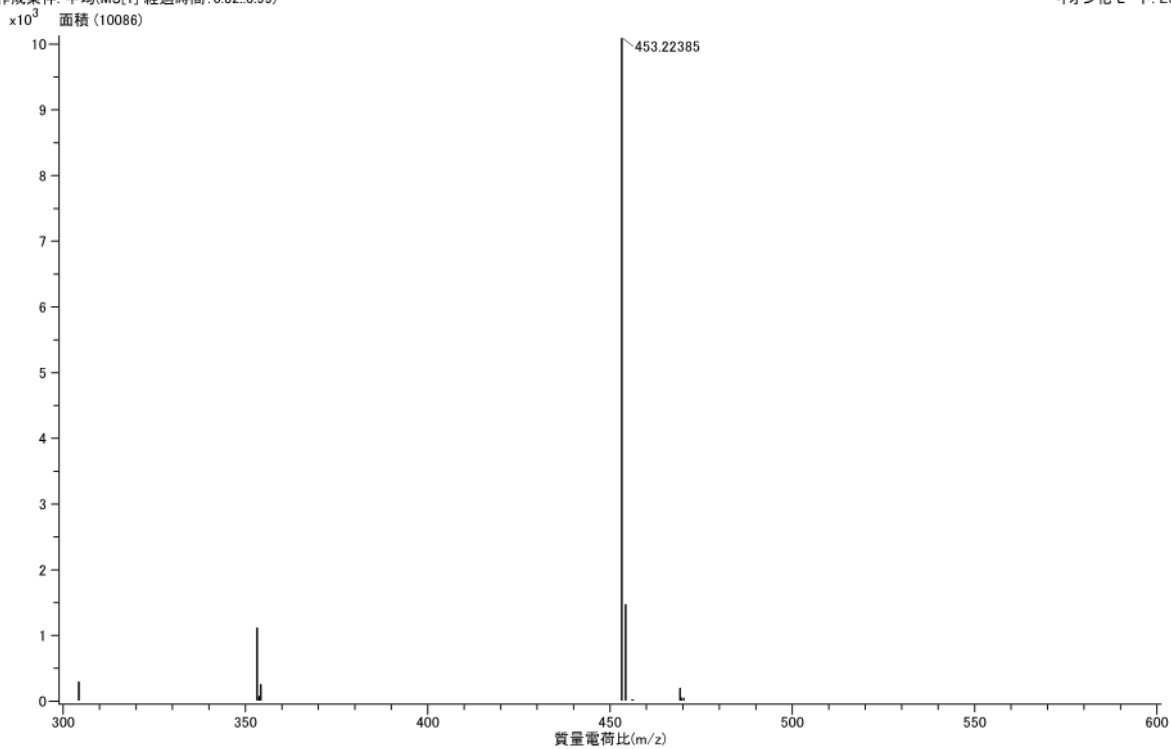

The HRESIMS spectrum of compound 22

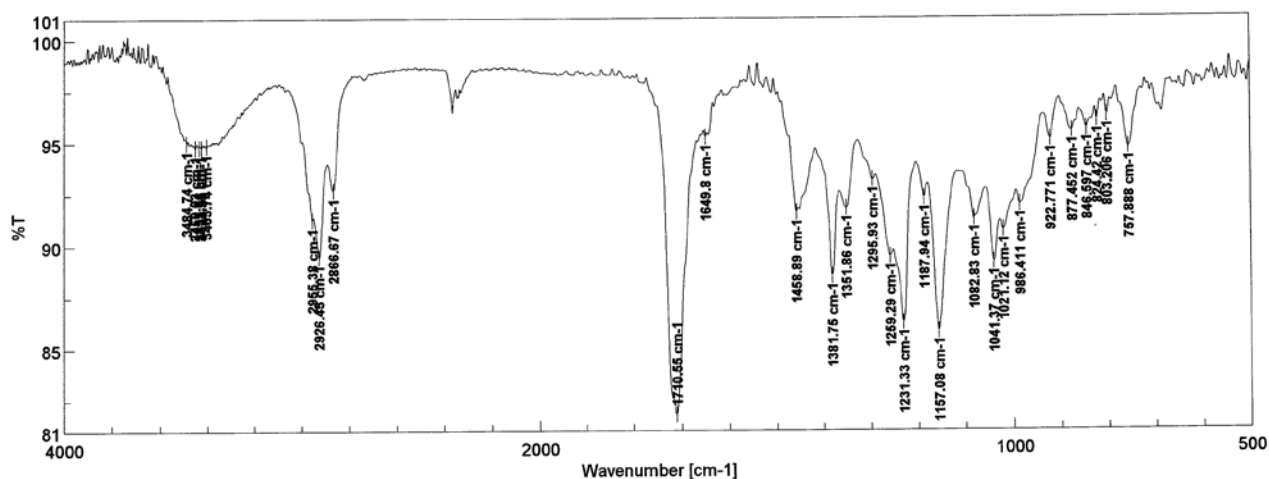

|          |                   |           |                 |          |
|----------|-------------------|-----------|-----------------|----------|
| [コメント情報] |                   | [測定情報]    |                 | Memory-2 |
| 試料名      | KS-19             | 機種名       | FT/IR-4100typeA |          |
| コメント     |                   | シリアル番号    | B109261016      |          |
| 測定者      |                   | 光源        | 標準光源            |          |
| 所属       | B                 | 検出器       | TGS             |          |
| 会社       | 東邦大学 薬学部          | 積算回数      | Auto (204)      |          |
|          |                   | 分解        | 4 cm-1          |          |
|          |                   | ゼロフライング   | On              |          |
| [データ情報]  |                   | アポダイゼーション | Cosine          |          |
| 作成日時     | 2017/07/26 16:37  | ゲイン       | Auto (16)       |          |
| データタイプ   | 等間隔データ            | アパーチャ     | Auto (7.1 mm)   |          |
| 横軸       | Wavenumber [cm-1] | スキャンスピード  | Auto (2 mm/sec) |          |
| 縦軸       | %T                | フィルタ      | Auto (30000 Hz) |          |
| スタート     | 0 cm-1            |           |                 |          |
| エンド      | 7800.65 cm-1      |           |                 |          |
| データ間隔    | 0.964233 cm-1     |           |                 |          |
| データ数     | 8091              |           |                 |          |

The IR spectrum of compound 22

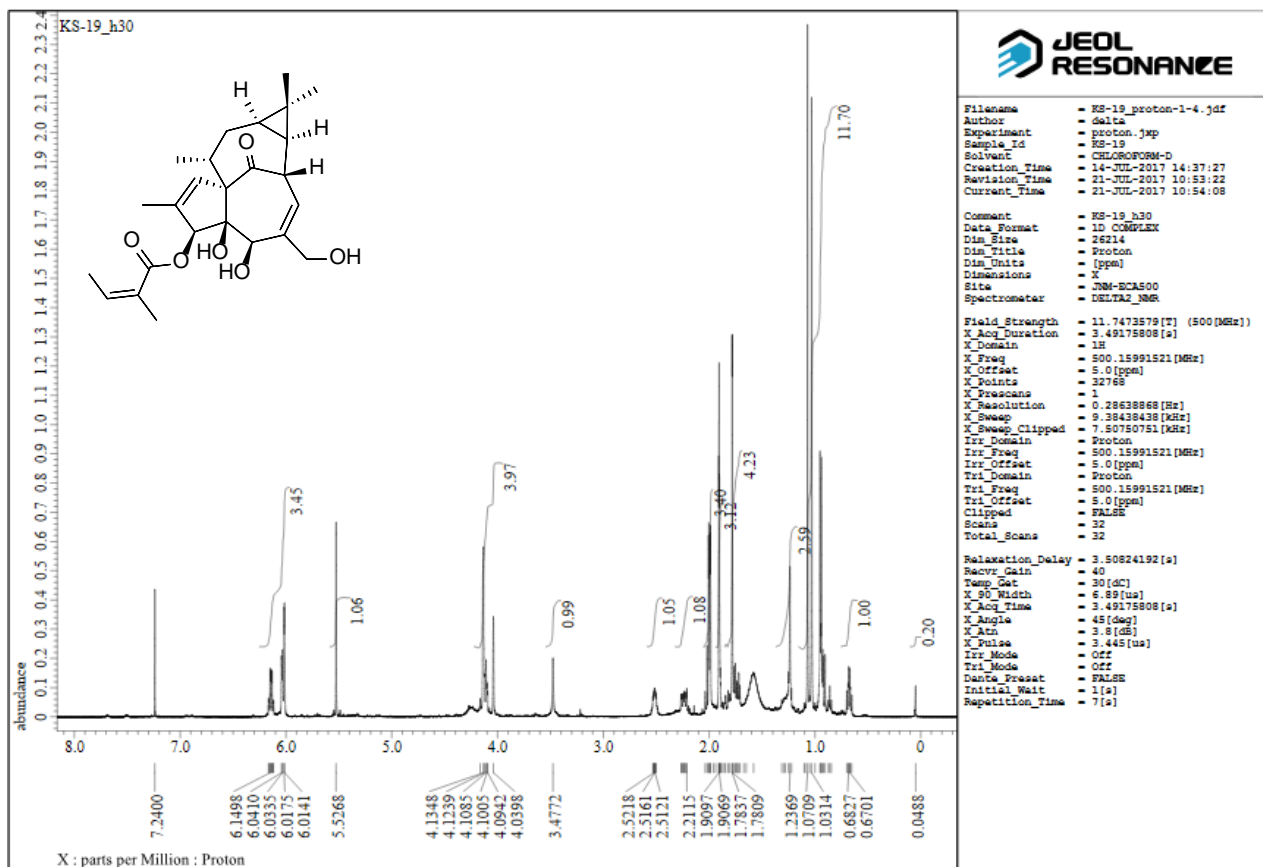

The <sup>1</sup>H spectrum of compound 22

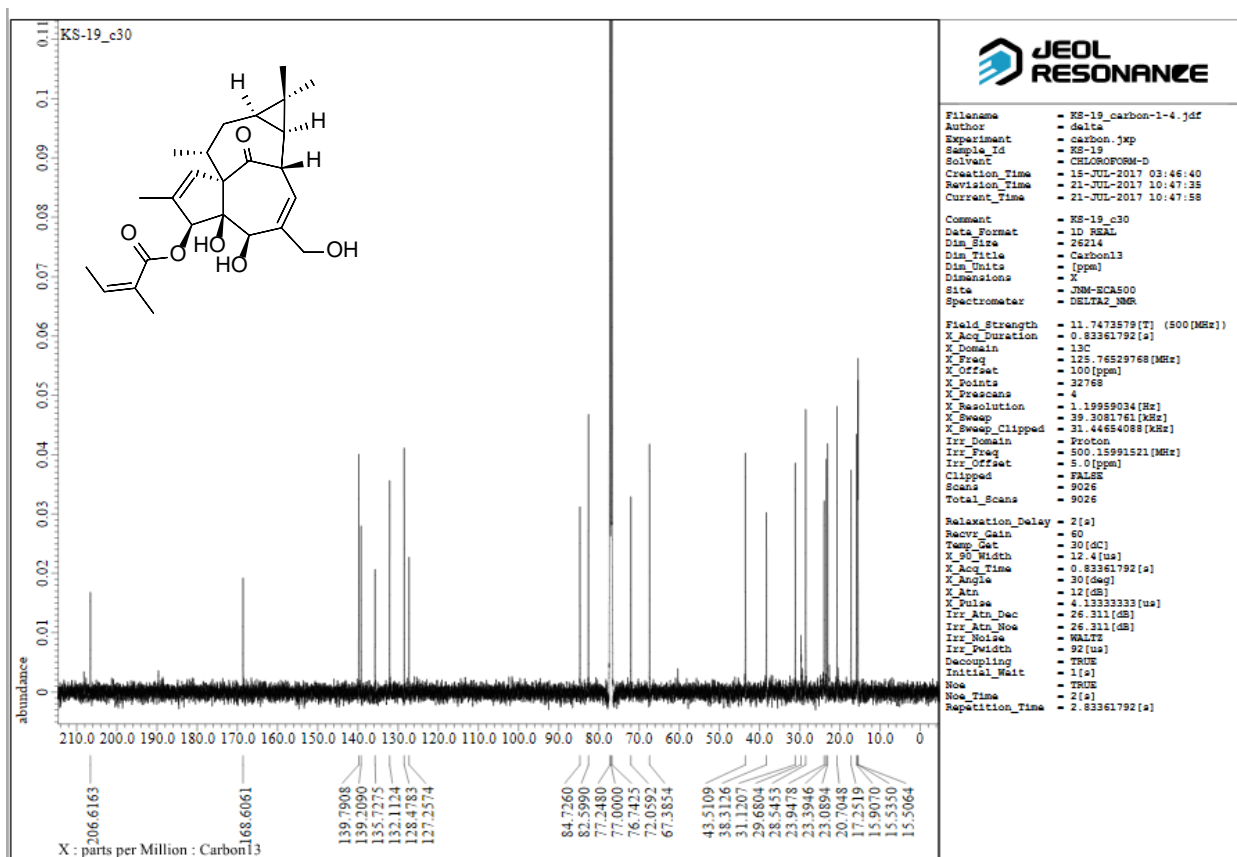

The  $^{13}\text{C}$  spectrum of compound 22

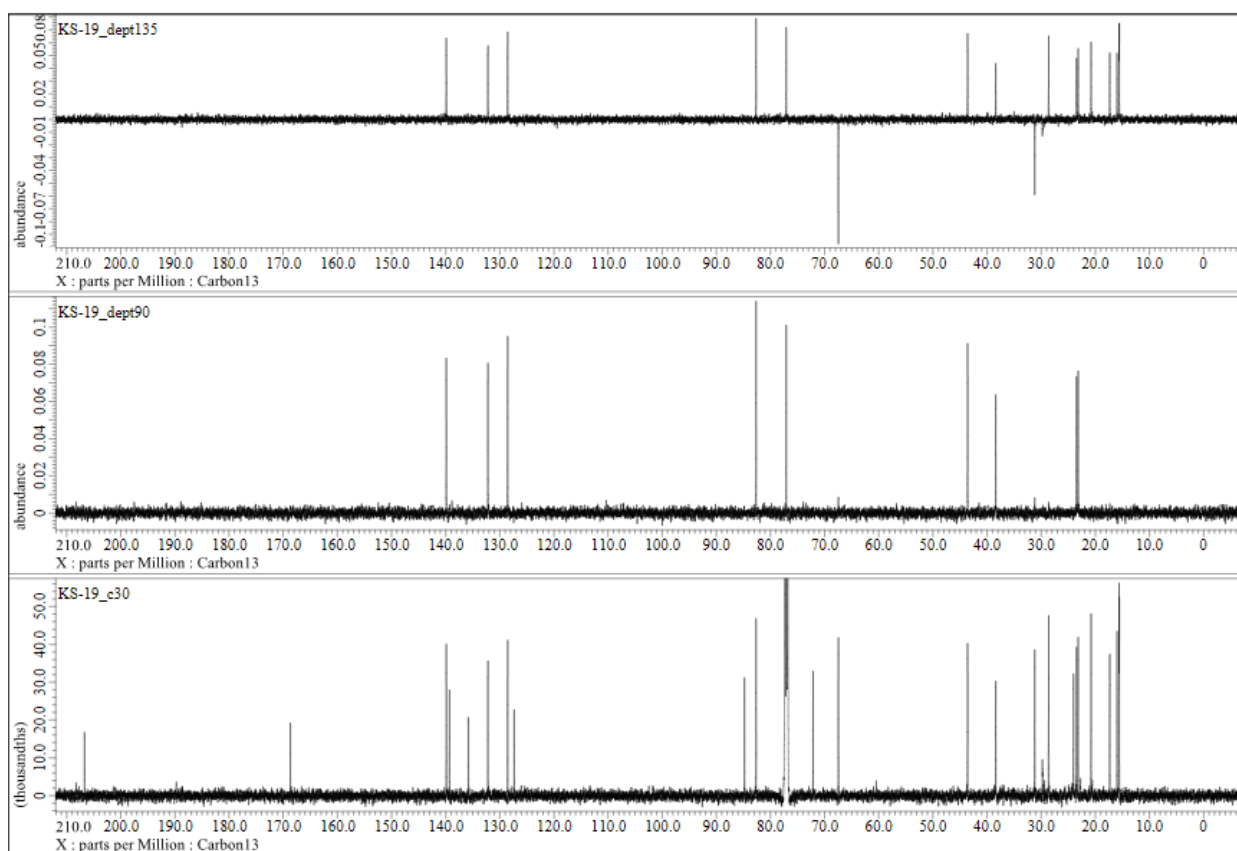

The DEPT spectrum of compound 22



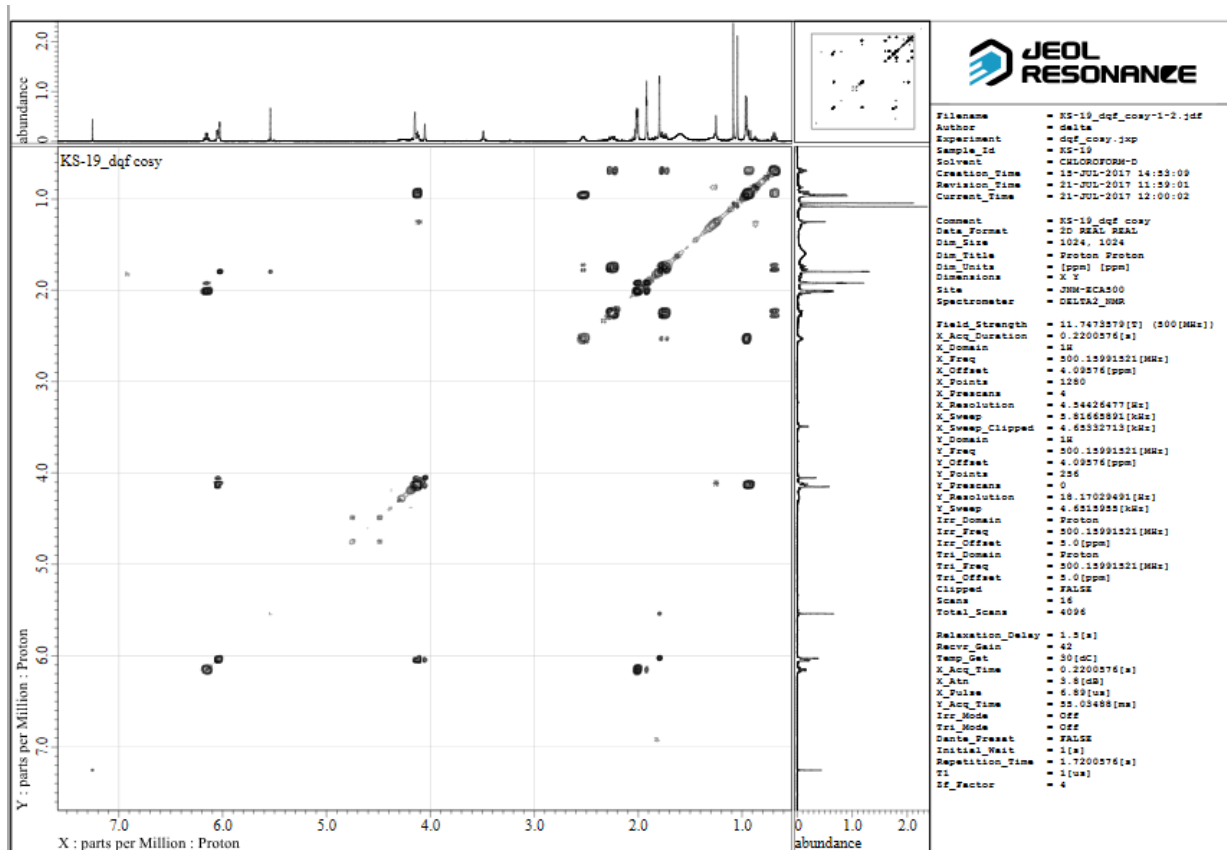

The DQF\_COSY spectrum of compound 22

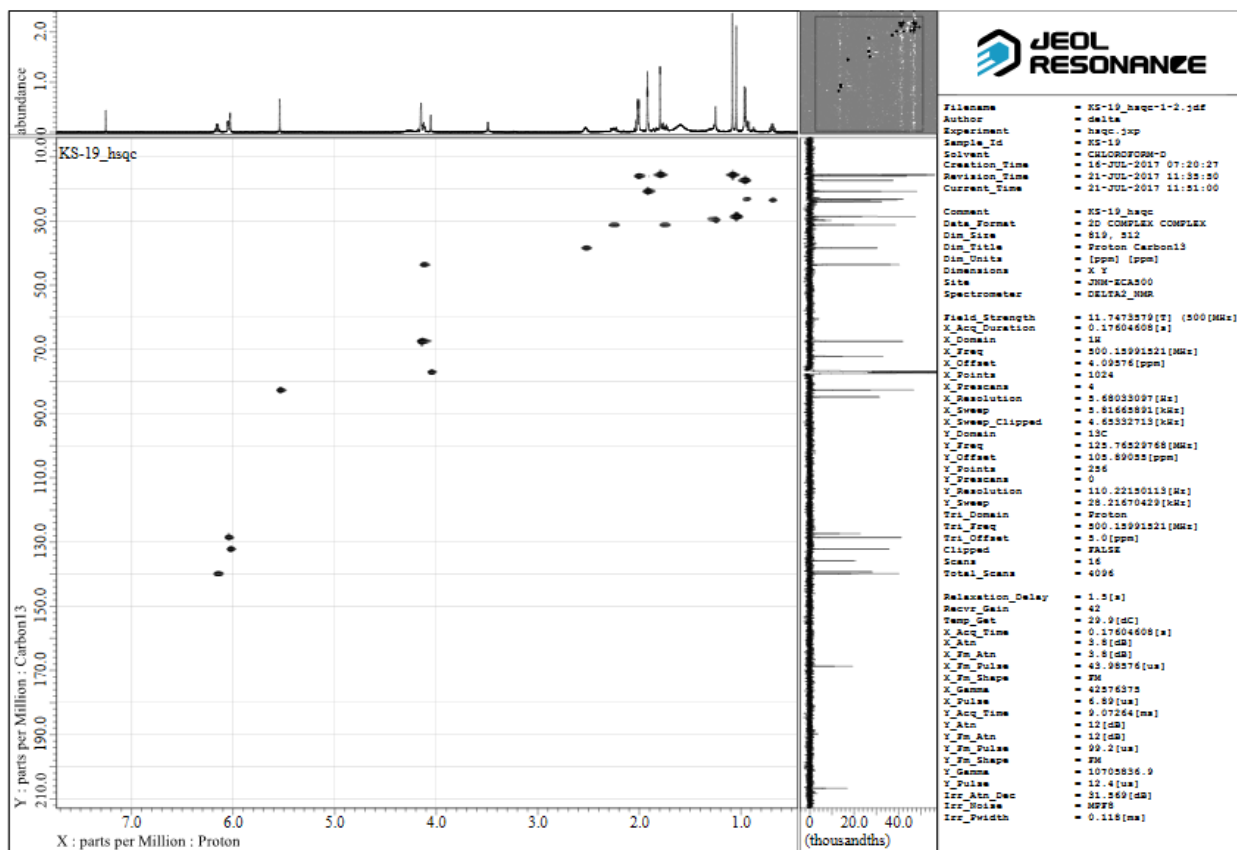

The HSQC spectrum of compound 22

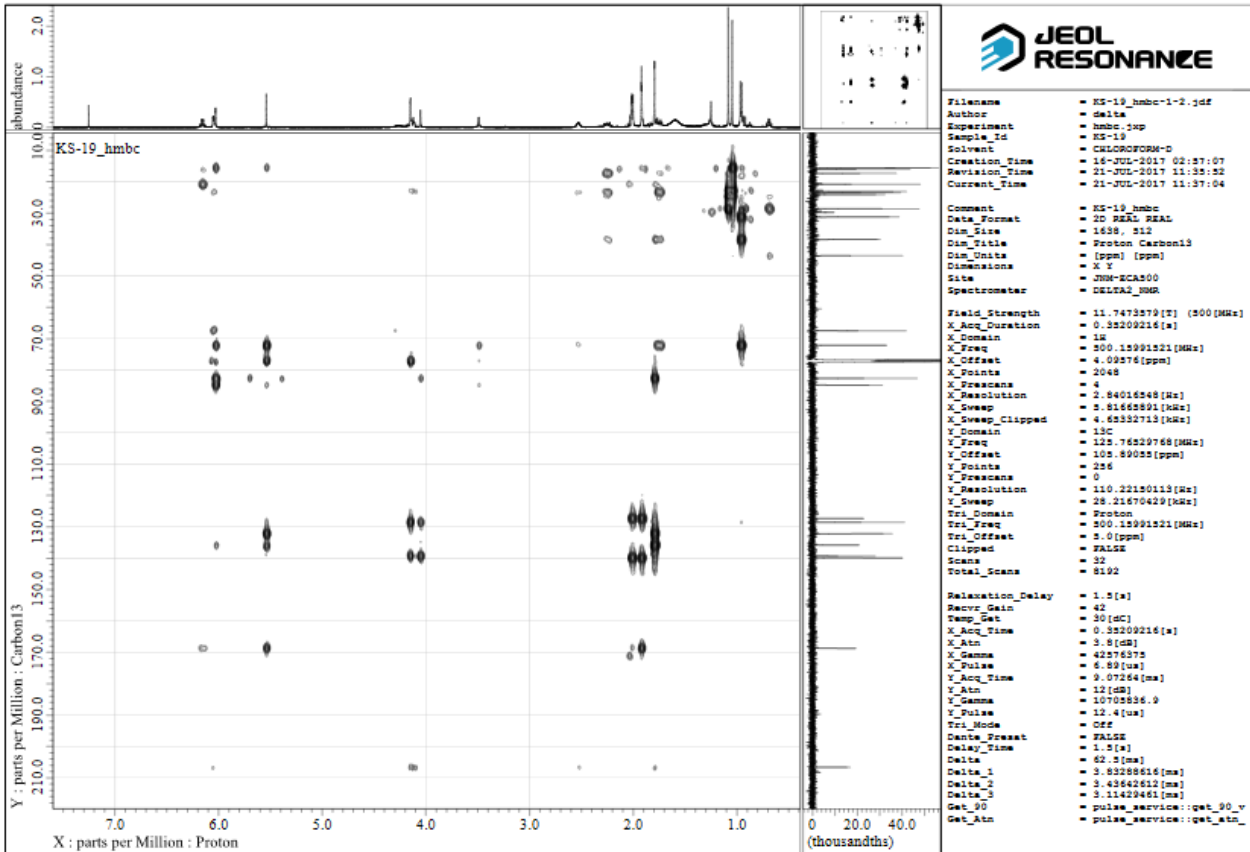

The HMBC spectrum of compound 22

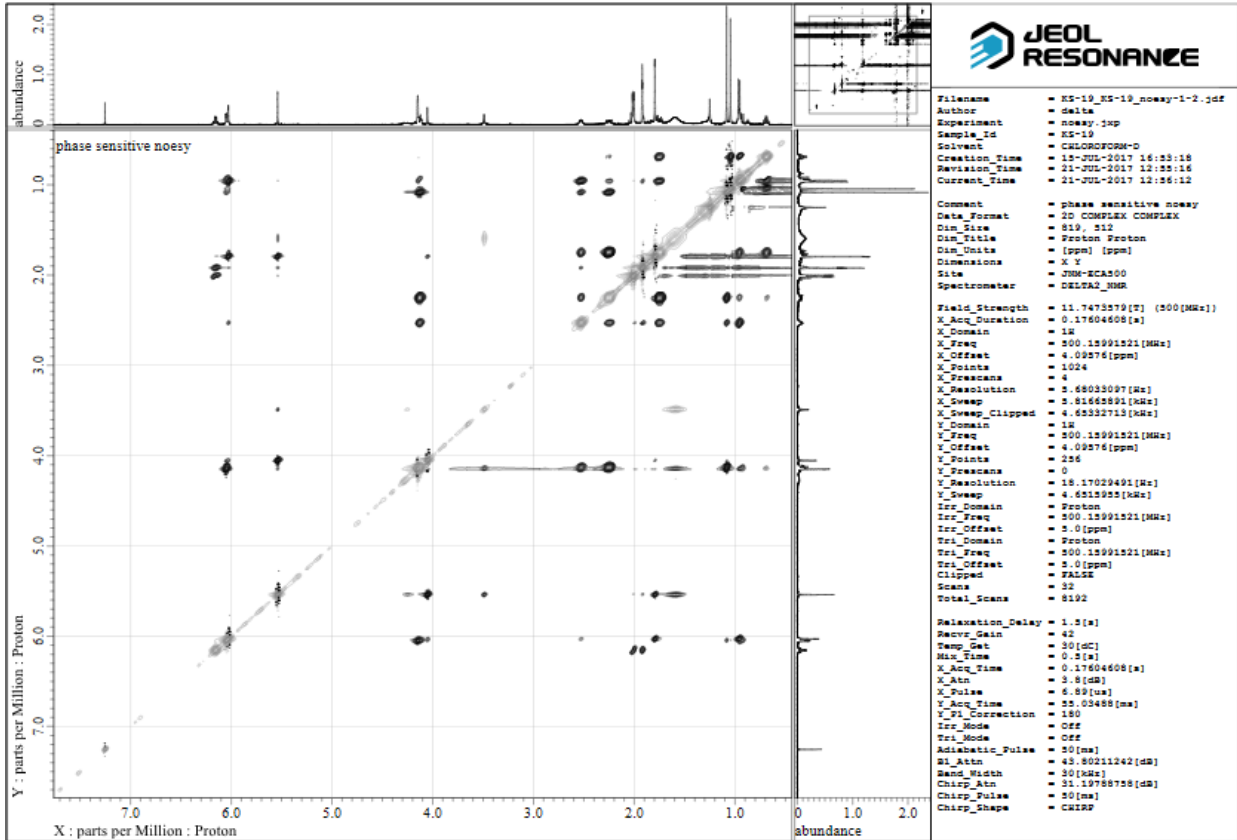

The NOESY spectrum of compound 22



測定データ名: KS-20  
 作成条件: 平均(MS[1]) 経過時間: 1.44..1.52  
 x10<sup>3</sup> 面積 (13436)

実験日時: 2017/10/13 22:18:36  
 イオン化モード: ESI+

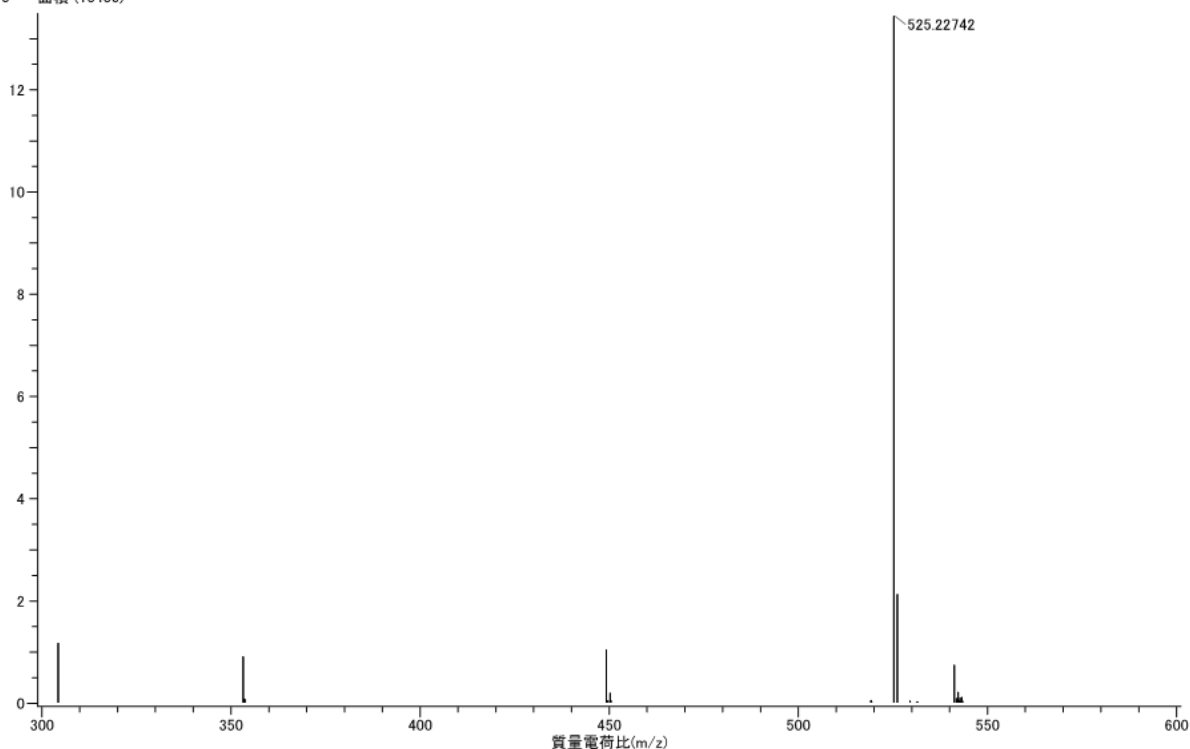

The HRESIMS spectrum of compound 23

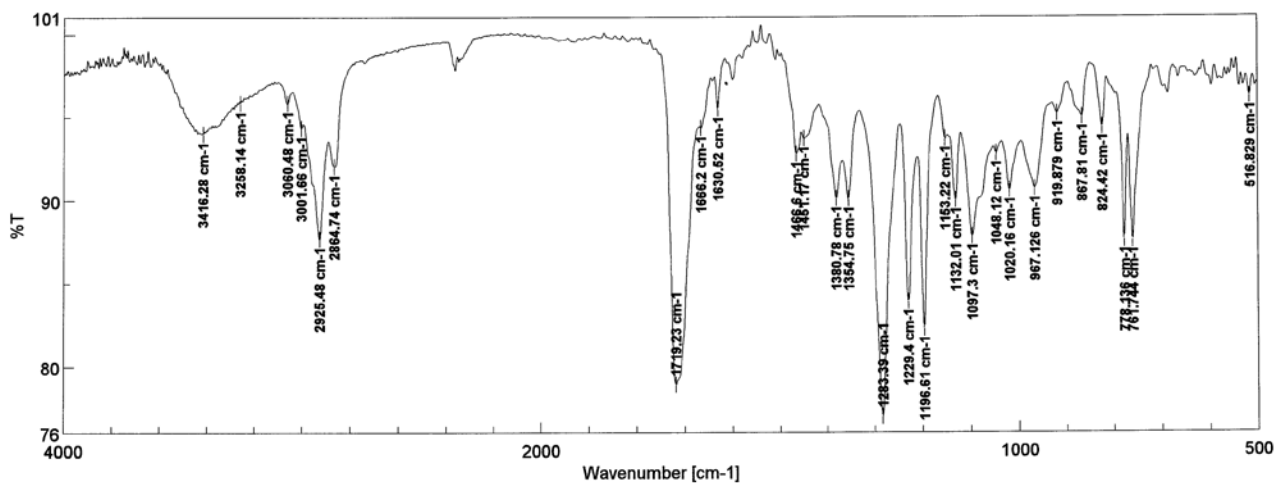

[コメント情報]

試料名 KS-20  
 コメント  
 測定者 B  
 所属 東邦大学 薬学部  
 会社

[データ情報]

作成日時 2017/07/26 16:50  
 データタイプ 等間隔データ  
 横軸 Wavenumber [cm-1]  
 縦軸 %T  
 スタート 0 cm-1  
 エンド 7800.65 cm-1  
 データ間隔 0.964233 cm-1  
 データ数 8091

[測定情報]

機種名 FT/IR-4100typeA  
 シリアル番号 B109261016

光源 標準光源  
 検出器 TGS  
 積算回数 Auto (210)  
 分解 4 cm-1  
 ゼロフリンク On  
 アポダイゼーション Cosine  
 ゲイン Auto (16)  
 アパーチャー Auto (7.1 mm)  
 スキャンスピード Auto (2 mm/sec)  
 フィルタ Auto (30000 Hz)

Memory-2

The IR spectrum of compound 23

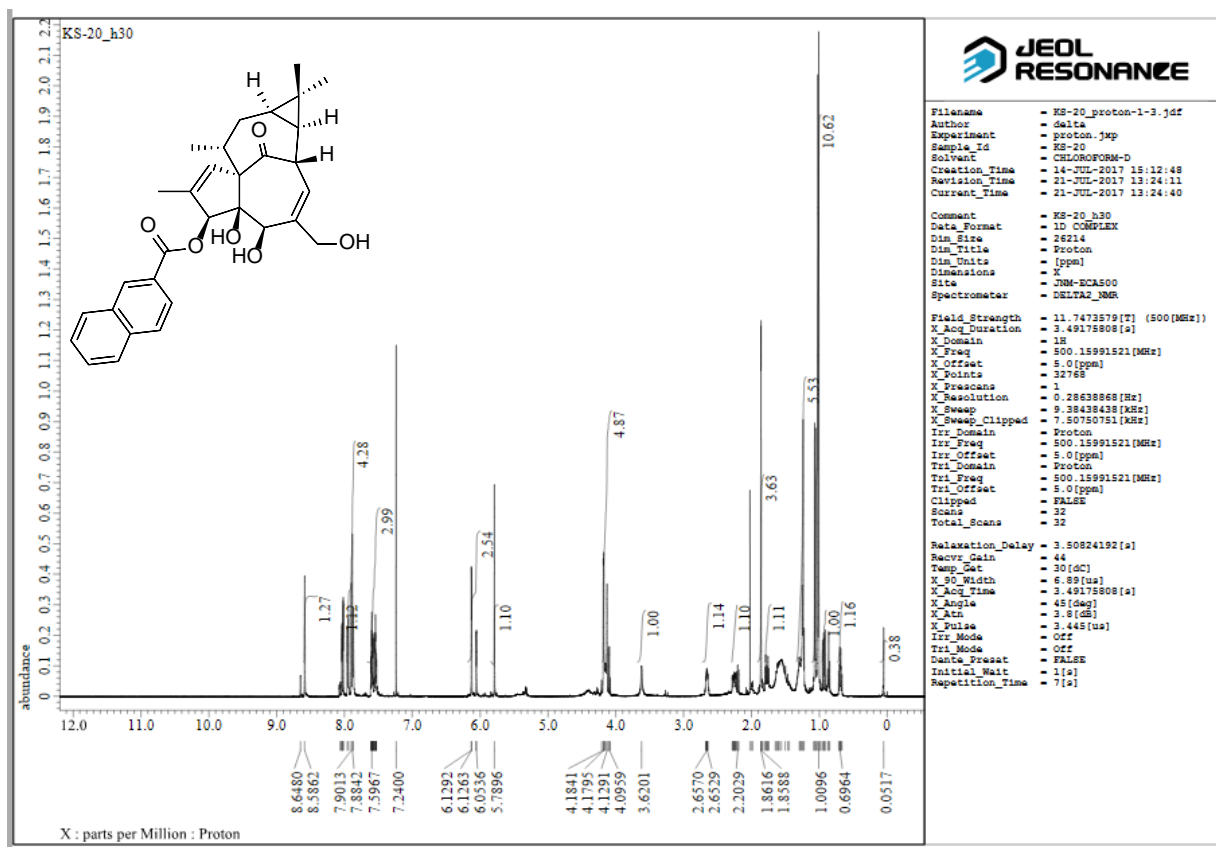

The  $^1\text{H}$  spectrum of compound 23

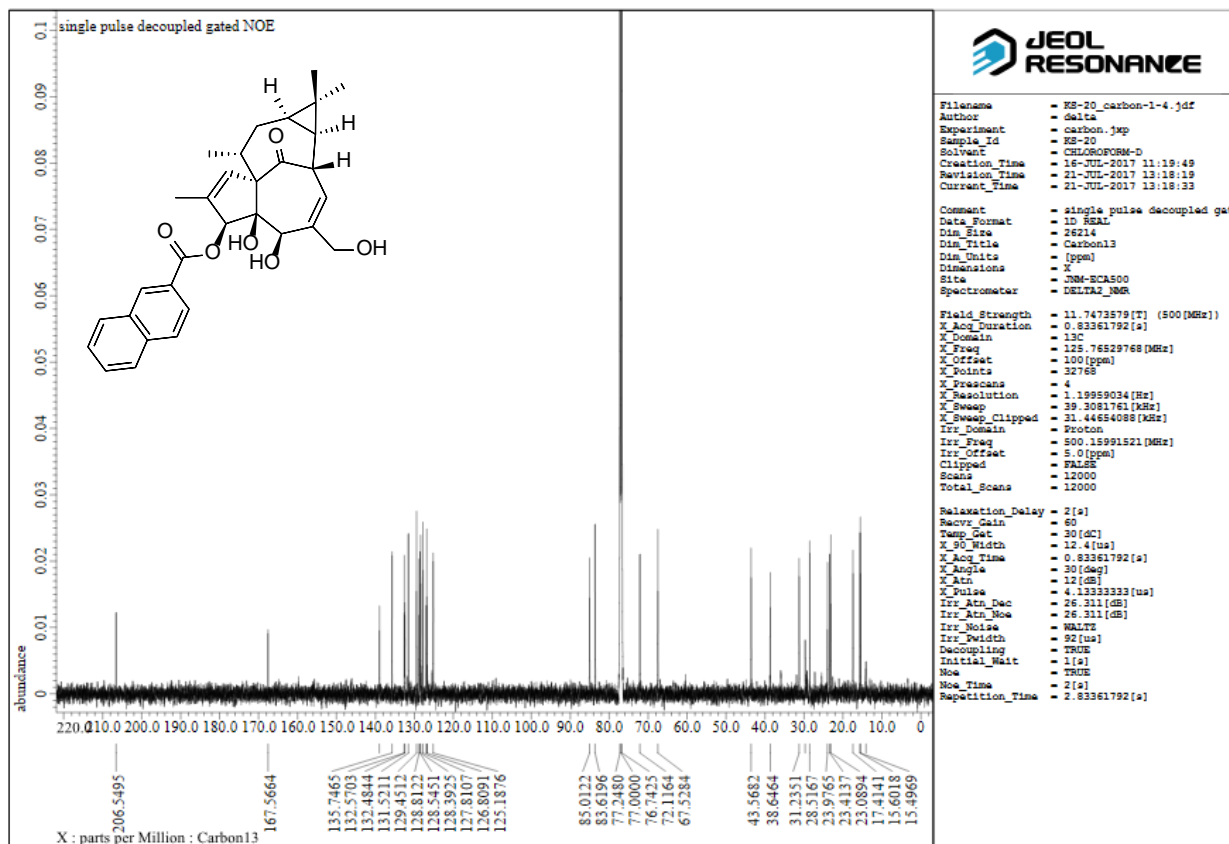

The  $^{13}\text{C}$  spectrum of compound 23

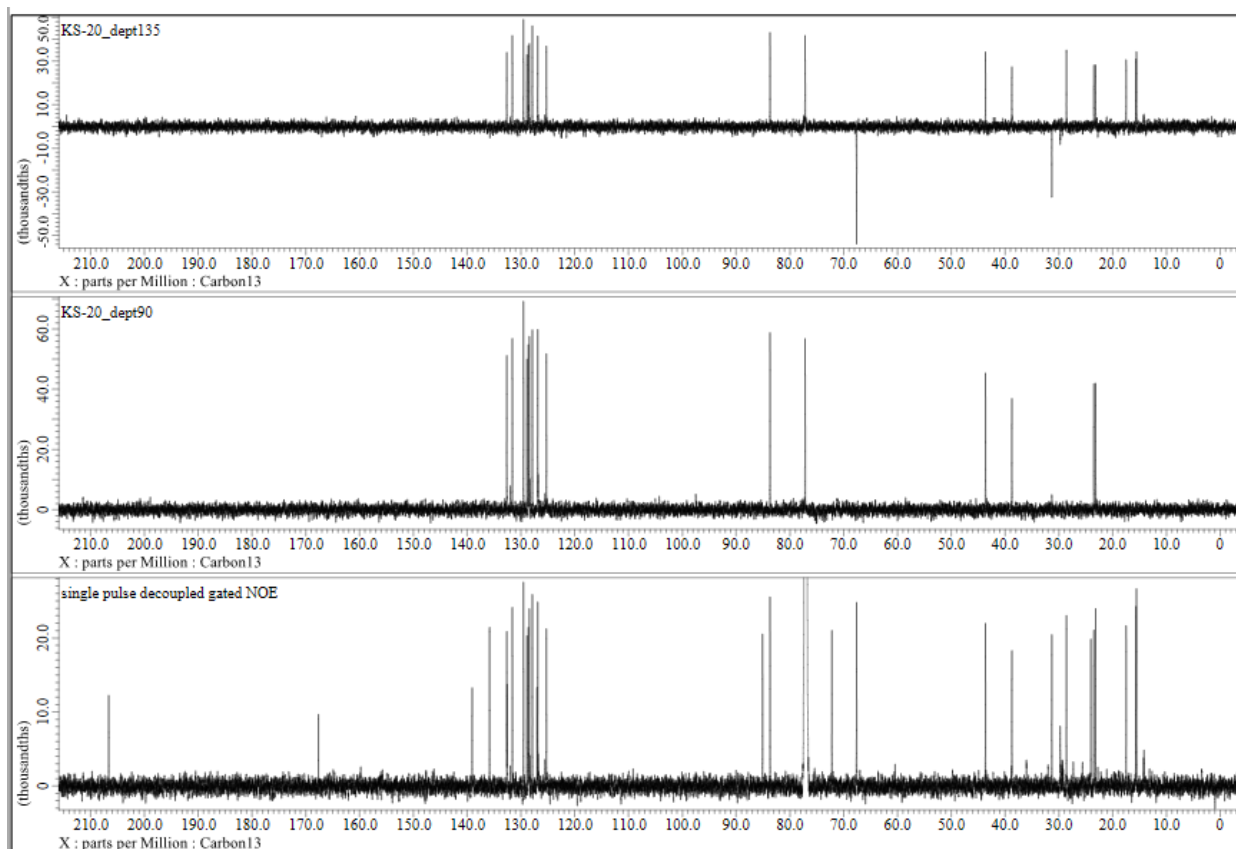

The DEPT spectrum of compound 23

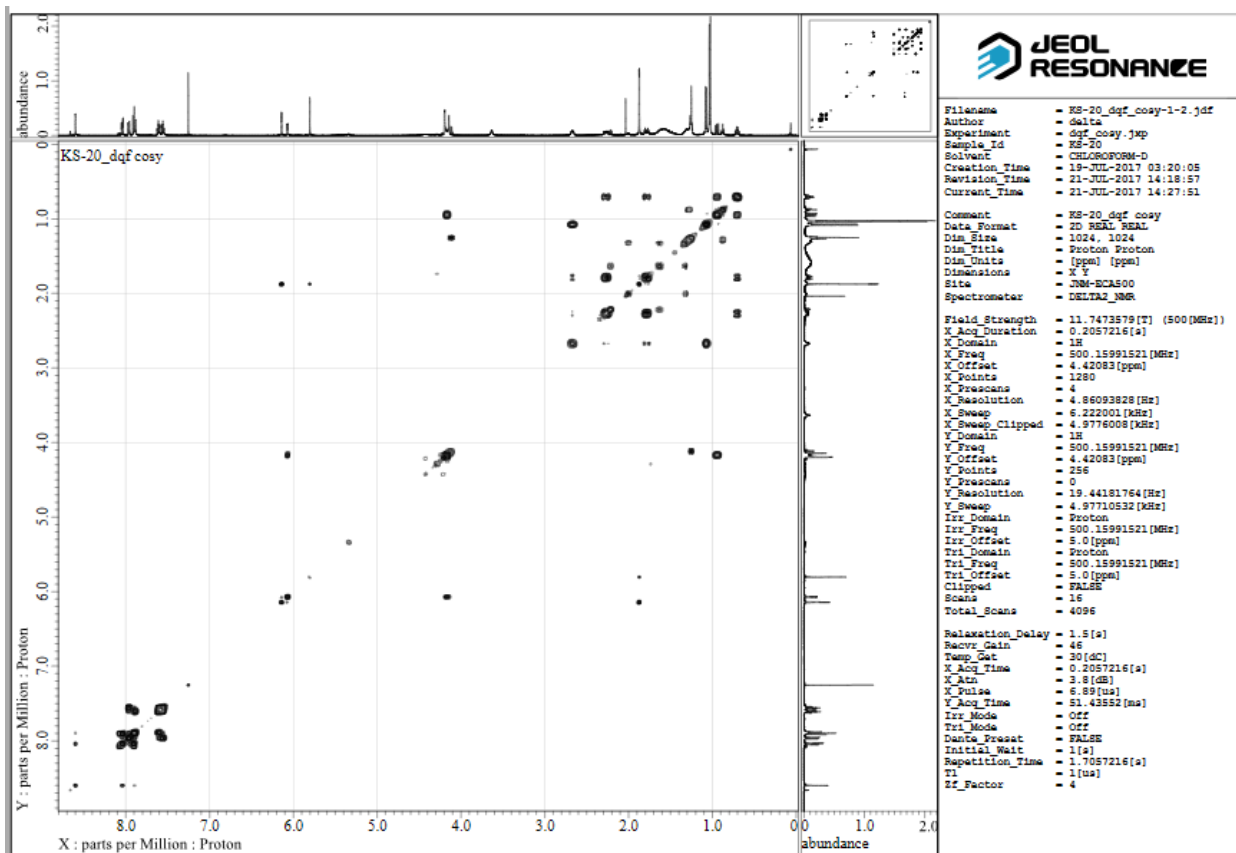

The DQF-COSY spectrum of compound 23

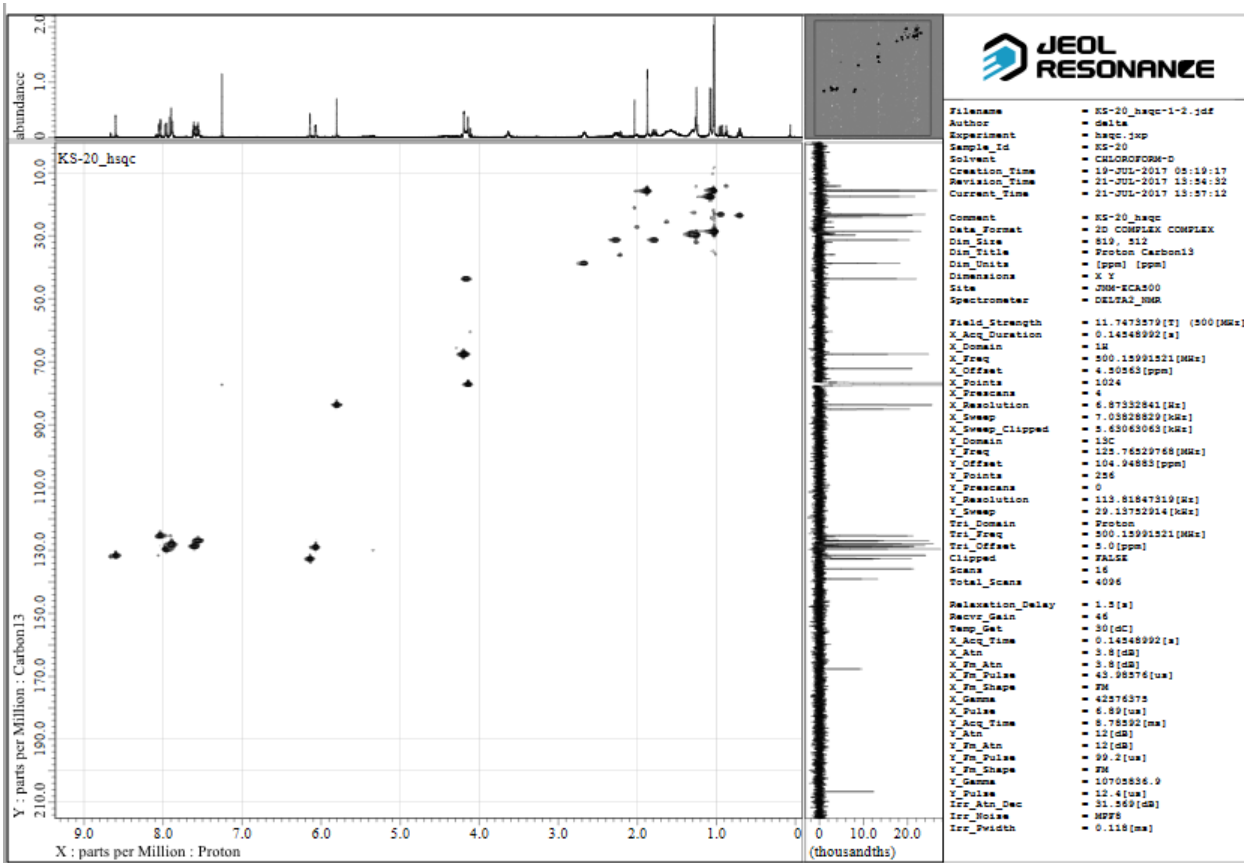

The HSQC spectrum of compound 23

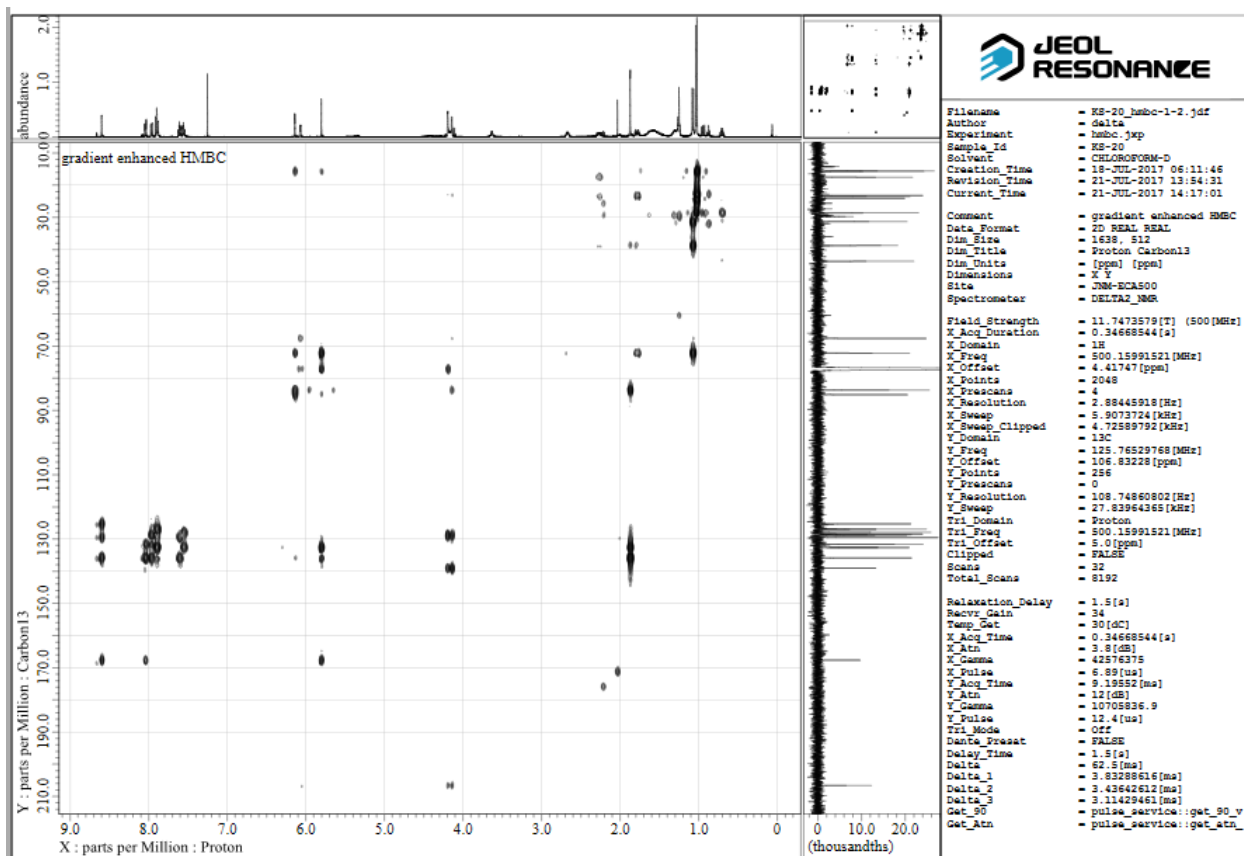

The HMBC spectrum of compound 23

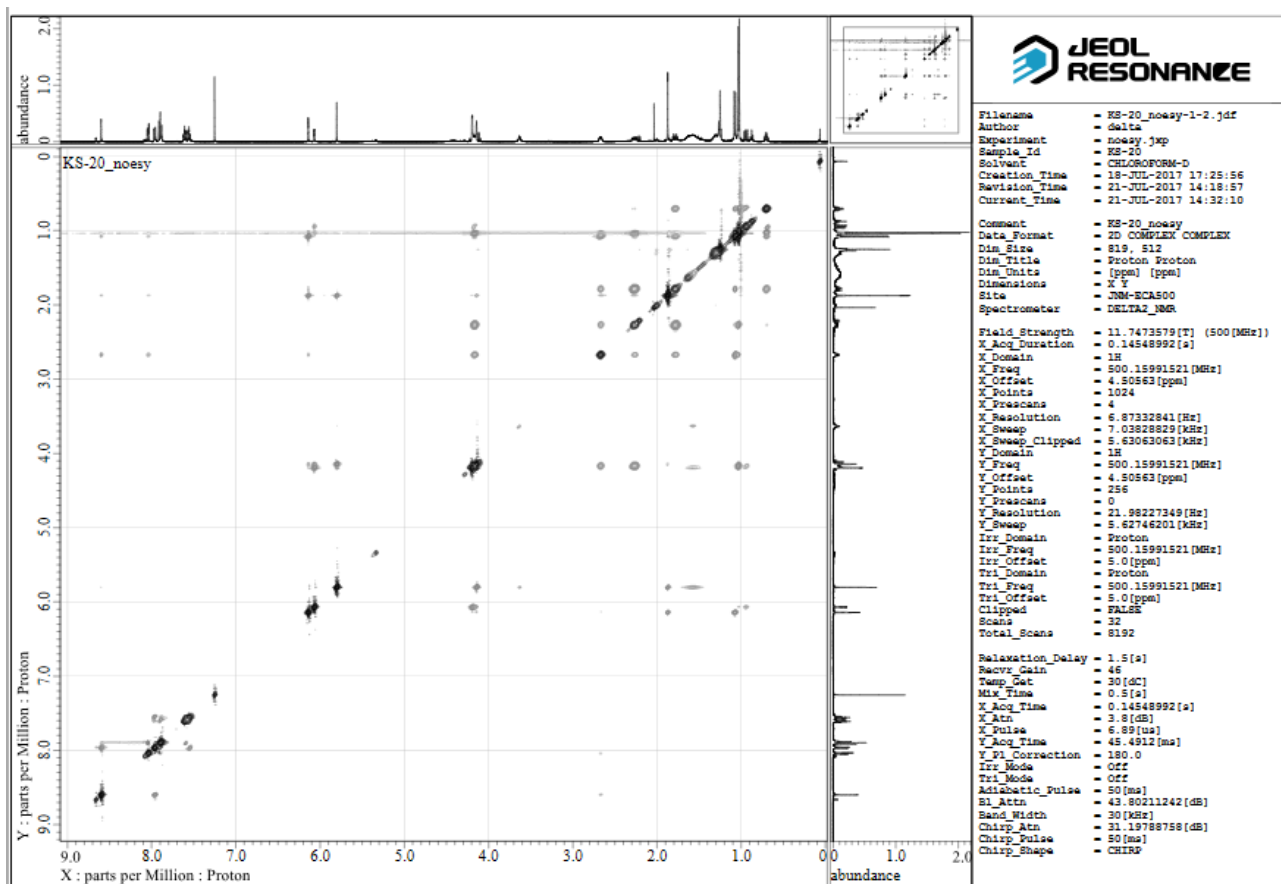

The NOESY spectrum of compound **23**
